# Supplementary material for: Stringency of COVID-19 Containment Response Policies and Air Quality Changes: A Global Analysis across 1851 Cities
Source: PubMed Central journal article supplement — Environ Sci Technol. 2022 Aug 15;56(17):12086–96. doi: 10.1021/acs.est.2c04303 (PMC9454244; doi:10.1021/acs.est.2c04303), 2022-08-15
Supplement: es2c04303_si_001.pdf [file es2c04303_si_001.pdf]

## Supplementary Information

# Stringency of COVID-19 Containment Response Policies and Air Quality Changes: A Global Analysis across 1,851 Cities

Jiawei Zhang<sup>1</sup>, Youn-Hee Lim<sup>1</sup>, Zorana Jovanovic Andersen<sup>1</sup>, George Napolitano<sup>1</sup>, Seyed Mahmood Taghavi Shahri<sup>1</sup>, Rina So<sup>1</sup>, Maude Plucker<sup>1</sup>, Mahdiah Danesh-Yazdi<sup>2,3</sup>, Thomas Cole-Hunter<sup>1</sup>, Jeanette Therning Jørgensen<sup>1</sup>, Shuo Liu<sup>1</sup>, Marie Bergmann<sup>1</sup>, Amar Jayant Mehta<sup>1</sup>, Laust H. Mortensen<sup>1,4</sup>, Weeberb Requia<sup>5</sup>, Theis Lange<sup>1</sup>, Steffen Loft<sup>1</sup>, Nino Kuenzli<sup>6,7</sup>, Joel Schwartz<sup>2</sup>, Heresh Amini<sup>1,\*</sup>

<sup>1</sup>Department of Public Health, University of Copenhagen, 1014, Copenhagen, Denmark

<sup>2</sup>Department of Environmental Health, Harvard TH Chan School of Public Health, Boston, Massachusetts 02115 United States

<sup>3</sup>Program in Public Health, Department of Family, Population & Preventive Medicine, Stony Brook University School of Medicine, Stony Brook, New York 11794-8434, USA

<sup>4</sup>Methods and Analysis, Statistics Denmark, 2100, Copenhagen, Denmark

<sup>5</sup>School of Public Policy and Government, Fundação Getúlio Vargas, Brasília, Distrito Federal 72125590, Brazil

<sup>6</sup>Swiss Tropical and Public Health Institute (Swiss TPH), Basel 4051, Switzerland

<sup>7</sup>University of Basel, Basel 4001, Switzerland

**\*Corresponding author:** Dr. Heresh Amini, Department of Public Health, University of Copenhagen, Copenhagen, 1014, Denmark. Email: [heresh.amini@sund.ku.dk](mailto:heresh.amini@sund.ku.dk)

### **This document contains:**

Tables S1 to S11

Supplementary Text 1: COVID-19 containment response policies data and clustering

Supplementary Text 2: Statistical analysis

Figures S1 to S14

Supplementary Text 3: Sample R code for Analysis

SI References

**Table S1** – A selection of studies on the impact of COVID-19 lockdowns on air quality.

| Author, Year              | Study Scale    | Study location                    | Study Period                    | Methodology                                | Study sample size              | Air pollution reported                | Air pollution measurement               | Lockdown definition                                     | Adjusted confounders |            |                     |
|---------------------------|----------------|-----------------------------------|---------------------------------|--------------------------------------------|--------------------------------|---------------------------------------|-----------------------------------------|---------------------------------------------------------|----------------------|------------|---------------------|
|                           |                |                                   |                                 |                                            |                                |                                       |                                         |                                                         | Weather              | Time trend | Time-varying policy |
| Lian et al, 2020(1)       | City level     | Wuhan, China                      | January to February, 2015–2020  | Calculating monthly mean difference        | 9 sites                        | AQI, PM2.5, PM10, SO2, NO2, CO and O3 | State-controlled monitoring stations    | 24 January to 23 February 2020 as lockdown period       | No                   | No         | No                  |
| Zangari et al, 2020(2)    | City level     | New York City, USA                | First 17 weeks of 2015–2020     | Linear time lag models                     | 13 PM2.5 sites and 3 NO2 sites | PM2.5 and NO2                         | Central monitoring air quality stations | From March 20, 2020, “NY on PAUSE”                      | No                   | Yes        | No                  |
| S Abdullah et al, 2020(3) | National level | Malaysia                          | 14 March 2020 to 14 April 2020  | Calculating the mean difference            | 68 sites                       | API, PM2.5                            | Central monitoring air quality stations | Government's Movement Control Order                     | No                   | No         | Yes                 |
| G Dantas et al, 2020(4)   | City level     | Rio de Janeiro, Brazil            | March 2, 2020 to April 16, 2020 | Calculating the median difference          | 3 sites                        | PM10, NO2, CO, O3                     | Monitoring station                      | State's governor declared public health emergency       | No                   | No         | No                  |
| Li et al, 2020(5)         | Regional level | Yangtze River Delta Region, China | January to March 2020           | Counterfactual model study, using WRF-CAMx | 41 cities                      | SO2, NO2, CO, O3, PM2.5 and PM10      | Monitoring station and WRF-CAMx model   | National Emergency Response Plan for Public Emergencies | Yes                  | Yes        | Yes                 |
| A Tobías et al, 2020(6)   | City level     | Barcelona, Spain                  | February 16th to March          | Calculating the mean difference            | 2 sites                        | PM10, NO2, SO2, O3                    | Monitoring station                      | Based on National Lockdown                              | No                   | No         | No                  |

|                                             |                   |                                         |                                                         |                                                                          |                   |                                                                               |                       |                                                                    |     |     |    |  |
|---------------------------------------------|-------------------|-----------------------------------------|---------------------------------------------------------|--------------------------------------------------------------------------|-------------------|-------------------------------------------------------------------------------|-----------------------|--------------------------------------------------------------------|-----|-----|----|--|
|                                             |                   |                                         | 30th,<br>2020                                           |                                                                          |                   |                                                                               |                       |                                                                    |     |     |    |  |
| Zheng et al,<br>2020(7)                     | City<br>level     | Wuhan,<br>China                         | January<br>23–<br>February<br>22 of<br>2020 and<br>2019 | De-weather<br>model using<br>boosted<br>regression tree                  | 1 sites           | CO, NO2,<br>O3, PM10,<br>PM2.5, SO2,<br>and PM2.5<br>chemical<br>compositions | Monitoring<br>station | Based on<br>local<br>government<br>policy                          | Yes | No  | No |  |
| Xu, K et al,<br>2020(8)                     | City<br>level     | Hubei,<br>China                         | January<br>to March<br>2017–<br>2020                    | Calculating<br>monthly mean<br>difference                                | 3 cities          | AQI, PM2.5,<br>PM10, SO2,<br>CO, NO2,<br>and O3                               | Monitoring<br>station | NA                                                                 | No  | No  | No |  |
| JD Berman et<br>al, 2020(9)                 | National<br>level | USA                                     | January 8<br>to April<br>21st,<br>2020                  | Calculating<br>mean<br>difference<br>with T-test                         | 122<br>counties   | PM2.5 and<br>NO2                                                              | Monitoring<br>station | States'<br>mandatory<br>non-essential<br>business<br>closure order | No  | Yes | No |  |
| P Wang et al,<br>2020(10)                   | National<br>level | China                                   | January 1<br>to<br>February<br>12, 2020                 | Scenario<br>analysis using<br>CMAP model                                 | 10 cities         | PM2.5                                                                         | CMAP model            | NA                                                                 | Yes | No  | No |  |
| MC<br>Collivignarelli<br>et al,<br>2020(11) | Regional<br>level | Metropolitan<br>City of<br>Milan, Italy | January 1<br>to April<br>10, 2020                       | Calculating<br>mean<br>difference<br>with<br>meteorological<br>selection | 3 sub-<br>regions | PM10,<br>PM2.5, BC,<br>C6H5, CO,<br>SO2, NO2,<br>NOx, O3,<br>NH3              | Monitoring<br>station | Based on<br>National<br>Lockdown<br>order                          | Yes | No  | No |  |
| Bao et al,<br>2020(12)                      | Regional<br>level | Northern<br>China,<br>China             | January 1<br>to March<br>21, 2020                       | City dynamic<br>panel data<br>model                                      | 44 cities         | AQI, SO2,<br>PM2.5,<br>PM10, NO2,<br>and CO                                   | Monitoring<br>station | Based on<br>Travel<br>restrictions in<br>each cities               | Yes | Yes | No |  |

|                           |                |                    |                                         |                                                    |                        |                                            |                                              |                                      |     |     |    |
|---------------------------|----------------|--------------------|-----------------------------------------|----------------------------------------------------|------------------------|--------------------------------------------|----------------------------------------------|--------------------------------------|-----|-----|----|
| Kerimray et al, 2020(13)  | City level     | Almaty, Kazakhstan | February 21 to April 14, 2020 and 2019  | Calculating mean difference                        | 31 sites               | PM2.5, NO2, SO2, CO, O3, and BTEX          | Monitoring station                           | Based on city-scale quarantine order | No  | No  | No |
| S Sharma et al, 2020(14)  | National level | India              | March 16 to April 14, 2017 to 2020      | Calculating mean difference                        | 22 cities              | PM10, PM2.5, CO, NO2, O3 and SO2           | Monitoring station                           | Based on National Lockdown order     | No  | No  | No |
| S Mahato et al, 2020(15)  | City level     | Delhi, India       | March 3 to April, 2017 to 2020          | Calculating mean difference                        | 34 sites               | AQI, PM10, PM2.5, SO2, NO2, CO, O3 and NH3 | Monitoring station                           | Based on local government policy     | No  | No  | No |
| M Bauwens et al, 2020(16) | Global level   | Global             | January to April, 2019 to 2020          | Calculating 14-day rolling means difference        | 5 regions or countries | NO2                                        | Satellite observation                        | Based on National Lockdown order     | No  | No  | No |
| A Chauhan et al, 2020(17) | City level     | NA                 | December to March 2017–2020             | Calculating monthly mean difference                | 9 cities               | PM2.5                                      | Monitoring station                           | NA                                   | No  | No  | No |
| K Chen et al, 2020(18)    | National level | China              | Jan 5 to March 14, 2016 to 2020         | Difference in difference method                    | 367 cities             | PM2.5 and NO2                              | Monitoring station                           | National Lockdown Order              | No  | Yes | No |
| T Le et al, 2020(19)      | National level | China              | January 23 to February 13, 2015 to 2020 | Difference in difference method and WRF-Chem model | 1 country              | PM2.5, NO2, SO2, and O3                    | Monitoring station and satellite observation | National Lockdown Order              | Yes | Yes | No |

|                           |                |                          |                                 |                                                                               |                                 |                                                                               |                    |                                                                                                |     |     |    |
|---------------------------|----------------|--------------------------|---------------------------------|-------------------------------------------------------------------------------|---------------------------------|-------------------------------------------------------------------------------|--------------------|------------------------------------------------------------------------------------------------|-----|-----|----|
| J Xing et al, 2020(20)    | Regional level | North China Plain, China | January and March, 2019 to 2020 | Response model combine both observation data and chemical transport modeling. | 5 Provinces                     | NO <sub>2</sub> , SO <sub>2</sub> , VOC and primary PM <sub>2.5</sub>         | Response Model     | National Lockdown Order                                                                        | No  | No  | No |
| G He et al, 2020(21)      | National level | China                    | January 1 to March 1, 2020      | Difference-in-difference model                                                | 324 cities                      | AQI and PM <sub>2.5</sub>                                                     | Monitoring station | local governments' lockdown                                                                    | Yes | Yes | No |
| ZS Venter et al, 2020(22) | Global level   | Global                   | January to May 15, 2017 to 2020 | Counterfactual model study, using multiple linear regression                  | 34 countries                    | NO <sub>2</sub> , O <sub>3</sub> and PM <sub>2.5</sub>                        | Monitoring station | Based on policies for stay-at-home restrictions, mobility restrictions, and workplace closures | Yes | Yes | No |
| Y Wang et al, 2020(23)    | City level     | China                    | January to April 2020           | Counterfactual analysis using random forest model                             | 6 cities                        | NO <sub>2</sub> , O <sub>3</sub> , PM <sub>2.5</sub> , and CO                 | Monitoring station | Based on Level-1 public health emergency response                                              | Yes | No  | No |
| L Menut et al, 2020(24)   | Regional level | Western Europe           | March of 2020                   | WRF-Chem model combine with monitoring data                                   | 27 countries                    | PM <sub>2.5</sub> and PM <sub>10</sub> , O <sub>3</sub> , and NO <sub>2</sub> | WRF-Chem model     | NA                                                                                             | Yes | No  | No |
| P Giani et al, 2020(25)   | Regional level | Europe and China         | Jan 1 to June 30, 2016-2020     | WRF-Chem model combine with monitoring data                                   | ~ 27 countries in Europe and 32 | PM <sub>2.5</sub>                                                             | WRF-Chem model     | Feb 1 to March 31, for China, and Feb 21 to                                                    | No  | No  | No |

|                             |                   |        |                                                                          |                                       |                                     |                                                      |                                                      |                                                                                            |     |     |    |
|-----------------------------|-------------------|--------|--------------------------------------------------------------------------|---------------------------------------|-------------------------------------|------------------------------------------------------|------------------------------------------------------|--------------------------------------------------------------------------------------------|-----|-----|----|
|                             |                   |        |                                                                          |                                       | areas in<br>China                   |                                                      |                                                      | May 17, for<br>Europe                                                                      |     |     |    |
| F Liu et al,<br>2020(26)    | National<br>level | China  | 4 weeks<br>before<br>LNY to 8<br>weeks<br>after<br>LNY                   | Fixed-effects<br>models               | 1023<br>observation<br>data         | NO2<br>tropospheric<br>vertical<br>column<br>density | Satellite<br>observation                             | First cases in<br>each<br>province,<br>restrict<br>movement<br>and stay in-<br>doors order | Yes | No  | No |
| HAH Dang et<br>al, 2021(27) | Global<br>level   | Global | 100 days<br>before<br>and after<br>the<br>lockdown<br>for each<br>county | Regression<br>Discontinuity<br>Design | 164<br>countries;<br>~ 1250<br>ADM1 | PM2.5 and<br>NO2                                     | Satellite<br>observation<br>and ground<br>monitoring | Positive<br>stringency<br>index,<br>defined by<br>OxCGRT                                   | Yes | Yes | No |
| Y Zhao et al,<br>2020(28)   | National<br>level | China  | January<br>16 to<br>February<br>1, 2020                                  | WRF-CMAQ<br>model                     | 354 cities                          | PM2.5,<br>PM10, CO,<br>SO2, NO2,<br>and O3           | Satellite<br>observation                             | First-Level<br>Public Health<br>Emergency<br>Response                                      | Yes | No  | No |

Note: AQI/API: Air quality(pollutant) index; PM10 (PM2.5): particulate matter with a diameter of <10  $\mu\text{m}$  (2.5  $\mu\text{m}$ ); BC: black carbon; C6H6: benzene; CO: carbon monoxide; SO2: sulfur dioxide; NO2: nitrogen dioxide, NOx: total nitrogen oxides, O3: ozone; NH3: ammonia, BTEX: benzene, toluene, ethylbenzene, and o-xylene; VOC: volatile organic compound; WRF-CAMx: Weather Research and Forecasting model coupled with Comprehensive Air Quality Model; CAMQ: Community Multi-scale Air Quality model; WRF-Chem: Weather Research and Forecasting model coupled to Chemistry; LNY: Lunar New Year; OxCGRT: Oxford University's COVID-19 Government Response Tracker; ADM1: first-order administrative division

**Table S2** - Summary statistics of daily air pollutants and CRPs implementation. Note that the population in each city is the total population in 2020, estimated by the Population division, Department of Economic and Social Affairs, United Nations. Further, the change in NO<sub>2</sub> was estimated by subtracting the mean difference in satellite observed NO<sub>2</sub> pre-CRPs and post-CRPs. Finally, the relative change (RC) and 95% confidence interval (CI) associated with 10 units increase for CRPs scores are presented. The RC was estimated by city-specific log-linear model, after adjusting the non-linear effect of time trend, meteorology, and the day of week. For the overall RC in last row, the estimates were pooled from each city using multilevel mixed effect meta-analytic model. Note that the RC here is for CRP score as a continuous variable (See Table S4 for results of CRPs as a categorical variable). Statistically significant (with P-value < 0.05) changes in NO<sub>2</sub> levels are indicated in bold.

| ID | Country or area | City           | Population | First Date of CRPs | Pre-CRPs NO <sub>2</sub> (µmol/m <sup>2</sup> ) Mean (25th, 50th, 75th Percentile) | Post-CRPs NO <sub>2</sub> (µmol/m <sup>2</sup> ) Mean (25th, 50th, 75th Percentile) | Change in NO <sub>2</sub> | Relative Change (95% CI)    |
|----|-----------------|----------------|------------|--------------------|------------------------------------------------------------------------------------|-------------------------------------------------------------------------------------|---------------------------|-----------------------------|
| 1  | Afghanistan     | Herat          | 605,575    | 2/23/2020          | 63.8 (55.3, 65.2, 72.3)                                                            | 65.7 (60.9, 67.4, 70.9)                                                             | 1.9                       | <b>-3.6% (-0.5%, -6.6%)</b> |
| 2  | Afghanistan     | Kabul          | 4,221,532  | 2/23/2020          | 124.0 (91.7, 115.2, 147.4)                                                         | 95.9 (72.4, 90.8, 109.1)                                                            | -28.0                     | 0.2% (3.7%, -3.1%)          |
| 3  | Afghanistan     | Kandahar       | 498,002    | 2/23/2020          | 68.5 (59.6, 69.5, 78.0)                                                            | 72.1 (65.8, 72.6, 78.5)                                                             | 3.6                       | 0.0% (2.3%, -2.2%)          |
| 4  | Afghanistan     | Mazar-e Sharif | 532,689    | 2/23/2020          | 73.4 (60.2, 72.3, 86.4)                                                            | 73.5 (64.0, 75.9, 82.4)                                                             | 0.0                       | 1.5% (4.2%, -1.1%)          |
| 5  | Albania         | Tirana         | 493,712    | 2/25/2020          | 80.0 (67.5, 80.9, 93.1)                                                            | 78.4 (68.8, 78.5, 86.2)                                                             | -1.6                      | 1.0% (4.0%, -1.8%)          |
| 6  | Algeria         | Algiers        | 2,767,661  | 3/10/2020          | 124.7 (83.4, 105.2, 141.1)                                                         | 102.9 (82.9, 93.5, 105.7)                                                           | -21.8                     | 3.8% (8.6%, -0.9%)          |
| 7  | Algeria         | Annaba         | 358,241    | 3/10/2020          | 91.5 (73.5, 86.7, 99.0)                                                            | 81.7 (74.0, 81.1, 86.6)                                                             | -9.8                      | <b>-2.7% (-0.5%, -4.9%)</b> |
| 8  | Algeria         | Batna          | 329,333    | 3/10/2020          | 77.1 (64.3, 75.4, 87.0)                                                            | 75.6 (67.2, 75.5, 81.2)                                                             | -1.5                      | <b>-2.2% (-0.4%, -4.1%)</b> |
| 9  | Algeria         | Blida          | 472,733    | 3/10/2020          | 136.4 (92.4, 122.2, 161.5)                                                         | 125.7 (94.1, 113.9, 145.7)                                                          | -10.7                     | 3.8% (8.9%, -1.1%)          |
| 10 | Algeria         | Qacentina      | 414,011    | 3/10/2020          | 107.1 (78.0, 99.5, 125.6)                                                          | 98.9 (84.5, 95.5, 110.2)                                                            | -8.2                      | 1.2% (3.8%, -1.3%)          |
| 11 | Algeria         | El Djelfa      | 503,397    | 3/10/2020          | 63.5 (54.2, 62.6, 72.5)                                                            | 67.4 (60.6, 68.5, 73.0)                                                             | 3.9                       | -0.7% (1.0%, -2.3%)         |

|    |           |                            |            |           |                             |                            |       |                             |
|----|-----------|----------------------------|------------|-----------|-----------------------------|----------------------------|-------|-----------------------------|
| 12 | Algeria   | Wahran (Oran)              | 899,182    | 3/10/2020 | 103.3 (78.1, 90.8, 115.6)   | 89.8 (77.5, 84.8, 95.2)    | -13.5 | 1.5% (4.1%, -1.1%)          |
| 13 | Algeria   | S'if                       | 313,401    | 3/10/2020 | 94.2 (73.3, 88.7, 107.9)    | 91.6 (75.7, 86.7, 100.4)   | -2.6  | 1.9% (5.3%, -1.4%)          |
| 14 | Angola    | Luanda                     | 8,329,798  | 2/6/2020  | 76.1 (61.0, 72.1, 88.6)     | 78.9 (63.4, 73.5, 90.9)    | 2.8   | <b>-2.4% (-0.3%, -4.5%)</b> |
| 15 | Angola    | Huambo                     | 671,413    | 2/6/2020  | 52.3 (39.6, 46.0, 65.0)     | 49.0 (37.2, 42.5, 62.7)    | -3.2  | 1.1% (3.0%, -0.7%)          |
| 16 | Angola    | Cabinda                    | 777,697    | 2/6/2020  | 50.0 (43.7, 49.6, 55.2)     | 54.6 (45.0, 52.5, 64.0)    | 4.5   | <b>-3.0% (-1.7%, -4.3%)</b> |
| 17 | Angola    | Lubango                    | 828,248    | 2/6/2020  | 53.9 (42.9, 49.9, 63.4)     | 49.9 (40.2, 47.2, 57.2)    | -4.0  | <b>1.7% (3.4%, 0.0%)</b>    |
| 18 | Angola    | Lobito                     | 426,310    | 2/6/2020  | 52.8 (44.8, 50.3, 60.3)     | 51.1 (43.0, 47.8, 58.8)    | -1.8  | <b>2.2% (3.5%, 0.8%)</b>    |
| 19 | Angola    | Benguela                   | 715,130    | 2/6/2020  | 52.8 (44.7, 49.7, 61.0)     | 50.1 (42.3, 47.6, 58.4)    | -2.8  | <b>1.4% (2.7%, 0.1%)</b>    |
| 20 | Angola    | Malanje                    | 665,150    | 2/6/2020  | 54.0 (38.7, 44.9, 63.6)     | 60.4 (39.2, 45.7, 81.1)    | 6.3   | -0.3% (1.5%, -2.0%)         |
| 21 | Angola    | Cuito                      | 535,407    | 2/6/2020  | 51.3 (39.0, 45.3, 64.0)     | 49.0 (37.2, 40.9, 64.2)    | -2.3  | 0.9% (2.7%, -0.8%)          |
| 22 | Angola    | Uige                       | 510,631    | 2/6/2020  | 52.6 (39.1, 45.9, 59.2)     | 64.2 (39.6, 51.4, 84.0)    | 11.7  | -1.5% (0.7%, -3.6%)         |
| 23 | Argentina | Bahia Blanca               | 315,533    | 3/11/2020 | 69.3 (61.0, 67.5, 76.2)     | 64.6 (49.4, 58.7, 72.6)    | -4.8  | 0.1% (1.7%, -1.5%)          |
| 24 | Argentina | Buenos Aires               | 15,153,729 | 3/11/2020 | 161.3 (111.9, 139.3, 187.1) | 146.1 (91.4, 113.2, 154.2) | -15.2 | <b>-3.5% (-1.5%, -5.5%)</b> |
| 25 | Argentina | C?doba                     | 1,571,944  | 3/11/2020 | 70.6 (59.6, 68.4, 77.8)     | 66.5 (57.2, 63.1, 72.1)    | -4.1  | -1.1% (0.4%, -2.5%)         |
| 26 | Argentina | Corrientes                 | 407,725    | 3/11/2020 | 59.0 (51.0, 58.1, 65.6)     | 54.7 (46.1, 52.3, 60.1)    | -4.2  | -0.6% (0.8%, -2.0%)         |
| 27 | Argentina | La Plata                   | 884,054    | 3/11/2020 | 92.5 (72.0, 84.1, 101.8)    | 90.1 (61.2, 73.1, 98.7)    | -2.4  | -2.1% (0.4%, -4.6%)         |
| 28 | Argentina | Mar Del Plata              | 665,707    | 3/11/2020 | 63.6 (55.5, 62.6, 69.9)     | 56.8 (46.1, 53.4, 63.2)    | -6.8  | <b>-2.8% (-0.9%, -4.7%)</b> |
| 29 | Argentina | Mendoza                    | 1,172,619  | 3/11/2020 | 85.6 (69.9, 81.3, 92.7)     | 86.9 (65.3, 75.4, 105.3)   | 1.3   | <b>-2.2% (-0.5%, -3.9%)</b> |
| 30 | Argentina | Neuqu?-Plottier-Cipolletti | 408,609    | 3/11/2020 | 69.4 (60.7, 67.3, 76.2)     | 66.3 (54.4, 62.8, 73.6)    | -3.1  | <b>-1.7% (0.0%, -3.3%)</b>  |
| 31 | Argentina | Posadas                    | 388,782    | 3/11/2020 | 60.7 (51.7, 59.7, 67.1)     | 52.2 (46.2, 51.5, 57.3)    | -8.4  | <b>-1.5% (-0.2%, -2.7%)</b> |
| 32 | Argentina | Resistencia                | 432,250    | 3/11/2020 | 58.5 (50.6, 57.4, 64.3)     | 54.8 (46.7, 53.1, 59.3)    | -3.7  | <b>-1.8% (0.0%, -3.6%)</b>  |
| 33 | Argentina | Rosario                    | 1,532,128  | 3/11/2020 | 75.2 (64.4, 71.6, 84.1)     | 75.3 (61.2, 68.9, 79.9)    | 0.1   | <b>-1.7% (0.0%, -3.3%)</b>  |



|    |           |                       |           |           |                            |                           |       |                          |
|----|-----------|-----------------------|-----------|-----------|----------------------------|---------------------------|-------|--------------------------|
| 34 | Argentina | Salta                 | 684,751   | 3/11/2020 | 54.0 (45.9, 52.2, 60.9)    | 50.9 (44.0, 49.1, 56.5)   | -3.1  | 1.6% (3.4%, -0.2%)       |
| 35 | Argentina | San Juan              | 536,913   | 3/11/2020 | 62.3 (56.6, 62.3, 68.2)    | 58.9 (52.7, 57.8, 62.7)   | -3.4  | 0.8% (1.8%, -0.3%)       |
| 36 | Argentina | San Miguel de Tucum?  | 985,656   | 3/11/2020 | 62.4 (51.6, 59.1, 71.3)    | 64.0 (50.3, 60.6, 74.6)   | 1.6   | -0.8% (0.8%, -2.3%)      |
| 37 | Argentina | San Salvador de Jujuy | 361,106   | 3/11/2020 | 52.8 (46.0, 52.2, 58.5)    | 48.0 (44.2, 48.1, 52.1)   | -4.8  | 0.3% (1.3%, -0.7%)       |
| 38 | Argentina | Santa Fe              | 562,917   | 3/11/2020 | 59.8 (52.9, 59.1, 65.7)    | 58.0 (49.4, 56.5, 63.6)   | -1.9  | -0.7% (1.0%, -2.3%)      |
| 39 | Argentina | Santiago Del Estero   | 435,567   | 3/11/2020 | 58.1 (50.2, 57.8, 65.3)    | 52.7 (47.3, 52.0, 57.6)   | -5.4  | -0.4% (0.7%, -1.4%)      |
| 40 | Australia | Gold Coast-Tweed Head | 699,226   | 2/1/2020  | 71.6 (59.5, 68.5, 79.3)    | 65.5 (57.0, 62.6, 71.2)   | -6.1  | -0.1% (2.3%, -2.6%)      |
| 41 | Australia | Sunshine Coast        | 346,829   | 2/1/2020  | 62.3 (55.0, 61.3, 68.4)    | 60.4 (53.3, 59.1, 65.7)   | -2.0  | -1.3% (0.6%, -3.3%)      |
| 42 | Australia | Wollongong            | 305,329   | 2/1/2020  | 92.8 (66.8, 83.2, 103.6)   | 81.9 (61.3, 72.5, 94.3)   | -10.9 | 0.8% (5.7%, -3.9%)       |
| 43 | Australia | Sydney                | 4,925,987 | 2/1/2020  | 122.1 (81.0, 102.8, 137.1) | 113.7 (75.2, 96.7, 125.4) | -8.5  | 1.3% (5.6%, -2.8%)       |
| 44 | Australia | Melbourne             | 4,967,733 | 2/1/2020  | 119.3 (81.5, 102.0, 136.7) | 111.3 (75.4, 94.6, 131.8) | -7.9  | <b>4.8% (9.0%, 0.9%)</b> |
| 45 | Australia | Brisbane              | 2,406,182 | 2/1/2020  | 90.3 (71.2, 83.5, 98.8)    | 85.0 (66.2, 77.9, 97.8)   | -5.3  | -1.2% (1.7%, -4.1%)      |
| 46 | Australia | Adelaide              | 1,336,403 | 2/1/2020  | 78.9 (63.3, 74.3, 88.7)    | 79.1 (60.8, 73.0, 90.1)   | 0.1   | 1.1% (3.7%, -1.4%)       |
| 47 | Australia | Perth                 | 2,041,959 | 2/1/2020  | 75.6 (64.2, 73.9, 85.1)    | 70.0 (55.3, 68.9, 81.3)   | -5.6  | 1.1% (2.7%, -0.5%)       |
| 48 | Australia | Canberra              | 457,330   | 2/1/2020  | 64.1 (54.6, 62.8, 71.9)    | 61.0 (50.8, 60.0, 68.8)   | -3.1  | <b>3.5% (6.2%, 0.8%)</b> |
| 49 | Australia | Newcastle-Maitland    | 450,360   | 2/1/2020  | 109.7 (74.3, 90.1, 130.4)  | 104.9 (66.6, 91.6, 131.5) | -4.8  | 0.6% (5.2%, -3.8%)       |

|    |            |                     |            |           |                             |                            |       |                             |
|----|------------|---------------------|------------|-----------|-----------------------------|----------------------------|-------|-----------------------------|
| 50 | Australia  | Central Coast       | 334,922    | 2/1/2020  | 104.8 (73.3, 93.6, 119.7)   | 103.3 (70.3, 89.5, 118.2)  | -1.6  | 1.5% (6.1%, -2.9%)          |
| 51 | Austria    | Wien (Vienna)       | 1,929,944  | 3/9/2020  | 117.3 (90.2, 105.7, 134.8)  | 101.1 (84.8, 96.0, 112.2)  | -16.2 | 0.1% (1.9%, -1.7%)          |
| 52 | Azerbaijan | Baku                | 2,341,443  | 1/30/2020 | 90.7 (69.2, 86.0, 102.8)    | 86.4 (71.1, 80.1, 93.7)    | -4.3  | -1.8% (0.2%, -3.7%)         |
| 53 | Azerbaijan | Gäncä               | 340,912    | 1/30/2020 | 79.1 (69.5, 78.4, 88.2)     | 73.7 (66.0, 74.8, 80.8)    | -5.4  | -0.1% (1.8%, -2.0%)         |
| 54 | Azerbaijan | Sumquayit           | 354,086    | 1/30/2020 | 80.9 (67.8, 79.7, 89.8)     | 79.1 (67.8, 77.4, 85.9)    | -1.7  | 0.5% (2.6%, -1.6%)          |
| 55 | Bahrain    | Al-Manamah (Manama) | 634,508    | 1/27/2020 | 152.2 (106.5, 137.1, 183.9) | 147.7 (97.3, 123.6, 175.3) | -4.5  | <b>-3.4% (-0.2%, -6.5%)</b> |
| 56 | Bangladesh | Barisal             | 483,506    | 1/22/2020 | 75.4 (62.0, 71.4, 81.5)     | 71.4 (61.8, 69.7, 78.0)    | -4.0  | -0.3% (1.6%, -2.2%)         |
| 57 | Bangladesh | Bogra               | 775,034    | 1/22/2020 | 86.7 (71.2, 82.4, 98.1)     | 91.9 (74.1, 85.0, 100.5)   | 5.2   | 1.3% (3.8%, -1.3%)          |
| 58 | Bangladesh | Chittagong          | 5,019,824  | 1/22/2020 | 114.7 (75.9, 97.8, 135.9)   | 105.9 (68.8, 94.2, 126.4)  | -8.8  | <b>8.2% (13.5%, 3.1%)</b>   |
| 59 | Bangladesh | Comilla             | 588,772    | 1/22/2020 | 76.4 (64.1, 73.0, 84.0)     | 78.0 (66.0, 73.8, 84.9)    | 1.6   | 0.0% (2.0%, -2.0%)          |
| 60 | Bangladesh | Dhaka               | 21,005,860 | 1/22/2020 | 182.2 (101.0, 145.8, 226.3) | 142.3 (85.4, 104.7, 154.3) | -40.0 | -2.6% (2.2%, -7.1%)         |
| 61 | Bangladesh | Khulna              | 953,745    | 1/22/2020 | 78.2 (64.6, 72.5, 86.0)     | 75.6 (64.6, 71.9, 82.8)    | -2.6  | -0.9% (0.7%, -2.5%)         |
| 62 | Bangladesh | Mymensingh          | 459,983    | 1/22/2020 | 80.9 (65.3, 75.5, 89.5)     | 83.2 (69.0, 76.6, 87.4)    | 2.3   | 1.8% (4.5%, -0.9%)          |
| 63 | Bangladesh | Rajshahi            | 907,732    | 1/22/2020 | 88.4 (72.6, 85.6, 99.7)     | 93.7 (73.5, 84.6, 100.5)   | 5.2   | 0.8% (2.9%, -1.2%)          |
| 64 | Bangladesh | Rangpur             | 406,956    | 1/22/2020 | 77.0 (63.0, 74.5, 86.0)     | 84.3 (68.2, 75.9, 90.8)    | 7.3   | <b>2.3% (4.3%, 0.4%)</b>    |
| 65 | Bangladesh | Sylhet              | 851,808    | 1/22/2020 | 77.1 (65.3, 73.7, 86.5)     | 78.8 (65.8, 76.9, 85.7)    | 1.7   | 0.6% (2.4%, -1.3%)          |
| 66 | Bangladesh | Rupganj             | 481,718    | 1/22/2020 | 190.7 (114.5, 156.6, 234.3) | 167.1 (99.5, 128.8, 196.4) | -23.6 | -0.5% (5.4%, -6.0%)         |
| 67 | Belarus    | Brest               | 358,587    | 3/14/2020 | 80.9 (64.9, 79.1, 89.0)     | 76.7 (70.0, 76.6, 82.3)    | -4.3  | 9.2% (20.7%, -1.3%)         |
| 68 | Belarus    | Gomel               | 557,589    | 3/14/2020 | 77.0 (62.2, 74.0, 84.2)     | 77.5 (68.9, 75.3, 82.4)    | 0.6   | 3.1% (14.4%, -7.1%)         |
| 69 | Belarus    | Grodno              | 386,787    | 3/14/2020 | 78.6 (62.5, 76.6, 90.8)     | 77.2 (70.4, 76.5, 83.7)    | -1.4  | -6.1% (5.2%, -16.1%)        |
| 70 | Belarus    | Minsk               | 2,028,104  | 3/14/2020 | 89.6 (69.4, 84.3, 101.0)    | 83.5 (73.8, 80.7, 89.7)    | -6.1  | 0.3% (12.9%, -11.0%)        |
| 71 | Belarus    | Mogilev             | 388,465    | 3/14/2020 | 73.0 (58.2, 72.2, 82.8)     | 73.2 (67.4, 72.5, 78.3)    | 0.2   | <b>8.2% (16.9%, 0.2%)</b>   |

|    |                                        |                   |           |           |                             |                             |       |                             |
|----|----------------------------------------|-------------------|-----------|-----------|-----------------------------|-----------------------------|-------|-----------------------------|
| 72 | Belarus                                | Vitebsk           | 377,966   | 3/14/2020 | 70.0 (55.2, 70.2, 82.8)     | 73.6 (66.8, 73.7, 79.4)     | 3.6   | 1.0% (12.8%, -9.5%)         |
| 73 | Belgium                                | Antwerpen         | 1,042,471 | 3/4/2020  | 156.8 (108.9, 142.2, 182.8) | 134.0 (100.7, 122.1, 150.3) | -22.8 | -3.2% (0.7%, -7.0%)         |
| 74 | Belgium                                | Bruxelles-Brussel | 2,080,788 | 3/4/2020  | 136.5 (96.9, 123.3, 158.1)  | 119.4 (92.2, 112.9, 138.9)  | -17.1 | -2.6% (1.8%, -6.8%)         |
| 75 | Belgium                                | Charleroi         | 413,429   | 3/4/2020  | 113.7 (80.4, 102.2, 131.8)  | 102.6 (82.3, 96.5, 117.4)   | -11.2 | -1.4% (1.9%, -4.6%)         |
| 76 | Belgium                                | Gent              | 466,412   | 3/4/2020  | 128.5 (88.1, 114.2, 150.9)  | 120.2 (87.6, 108.1, 152.1)  | -8.3  | -3.1% (1.1%, -7.2%)         |
| 77 | Belgium                                | Liège             | 677,589   | 3/4/2020  | 116.8 (83.3, 106.4, 133.6)  | 110.2 (85.5, 101.3, 122.3)  | -6.6  | 1.5% (5.2%, -2.0%)          |
| 78 | Benin                                  | Cotonou           | 691,949   | 2/1/2020  | 52.2 (44.6, 51.7, 59.0)     | 51.0 (44.9, 50.1, 55.1)     | -1.2  | -1.9% (1.3%, -4.9%)         |
| 79 | Benin                                  | Djougou           | 343,419   | 2/1/2020  | 49.9 (43.1, 48.9, 56.0)     | 48.9 (44.7, 49.4, 53.4)     | -1.0  | <b>-2.1% (-0.3%, -3.9%)</b> |
| 80 | Benin                                  | Parakou           | 357,912   | 2/1/2020  | 49.0 (42.6, 48.7, 54.4)     | 49.3 (45.4, 49.0, 53.4)     | 0.3   | <b>-2.3% (-0.7%, -3.8%)</b> |
| 81 | Benin                                  | Abomey-Calavi     | 1,056,440 | 2/1/2020  | 54.5 (47.5, 55.0, 61.4)     | 52.3 (46.7, 51.8, 59.3)     | -2.2  | -1.1% (1.7%, -3.8%)         |
| 82 | Bolivia<br>(Plurinational<br>State of) | Cochabamba        | 1,303,907 | 3/12/2020 | 69.7 (45.0, 58.9, 84.8)     | 54.8 (42.3, 47.5, 58.7)     | -14.9 | <b>-3.6% (-1.1%, -6.0%)</b> |
| 83 | Bolivia<br>(Plurinational<br>State of) | La Paz            | 1,857,797 | 3/12/2020 | 52.3 (40.5, 46.3, 56.4)     | 50.5 (38.8, 43.8, 52.7)     | -1.8  | <b>-2.7% (-0.8%, -4.5%)</b> |
| 84 | Bolivia<br>(Plurinational<br>State of) | Oruro             | 318,022   | 3/12/2020 | 43.9 (39.2, 43.3, 47.7)     | 39.3 (36.0, 38.5, 41.8)     | -4.7  | 0.1% (1.1%, -1.0%)          |
| 85 | Bolivia<br>(Plurinational<br>State of) | Santa Cruz        | 1,712,688 | 3/12/2020 | 54.3 (43.1, 49.4, 60.1)     | 44.2 (38.1, 42.8, 48.7)     | -10.1 | 0.0% (1.4%, -1.5%)          |
| 86 | Bosnia and<br>Herzegovina              | Sarajevo          | 343,089   | 3/10/2020 | 80.9 (66.1, 77.1, 88.1)     | 73.9 (65.8, 72.7, 79.3)     | -7.0  | 1.3% (3.6%, -0.8%)          |
| 87 | Brazil                                 | Anápolis          | 384,679   | 3/12/2020 | 50.9 (43.1, 49.1, 57.0)     | 44.9 (39.9, 44.4, 49.4)     | -6.1  | 2.4% (5.3%, -0.4%)          |
| 88 | Brazil                                 | Aracaju           | 1,009,380 | 3/12/2020 | 43.3 (39.3, 42.8, 47.0)     | 40.8 (36.5, 40.1, 44.2)     | -2.5  | <b>3.1% (5.0%, 1.2%)</b>    |
| 89 | Brazil                                 | Bauru             | 375,733   | 3/12/2020 | 60.1 (50.7, 58.1, 66.3)     | 54.0 (47.7, 53.5, 60.2)     | -6.0  | <b>-3.9% (-0.9%, -6.7%)</b> |

|     |        |                       |           |           |                         |                         |      |                             |
|-----|--------|-----------------------|-----------|-----------|-------------------------|-------------------------|------|-----------------------------|
| 90  | Brazil | Bel?                  | 2,334,462 | 3/12/2020 | 37.3 (33.5, 37.3, 41.6) | 40.8 (34.0, 40.3, 45.3) | 3.5  | 1.9% (4.8%, -0.8%)          |
| 91  | Brazil | Belo Horizonte        | 6,084,430 | 3/12/2020 | 75.2 (59.2, 70.5, 84.7) | 69.7 (53.3, 62.1, 73.6) | -5.5 | <b>-3.5% (-0.6%, -6.3%)</b> |
| 92  | Brazil | Blumenau              | 347,831   | 3/12/2020 | 61.4 (53.2, 59.6, 67.8) | 55.7 (47.7, 52.8, 61.2) | -5.8 | -1.6% (0.7%, -3.8%)         |
| 93  | Brazil | Boa Vista             | 344,307   | 3/12/2020 | 36.3 (32.3, 35.8, 39.7) | 37.5 (33.1, 37.8, 41.6) | 1.3  | -0.7% (1.1%, -2.5%)         |
| 94  | Brazil | Bras?ia               | 4,645,843 | 3/12/2020 | 55.6 (44.6, 50.7, 61.1) | 48.1 (41.6, 47.3, 52.6) | -7.5 | 1.6% (4.7%, -1.4%)          |
| 95  | Brazil | Campina Grande        | 399,758   | 3/12/2020 | 41.6 (37.7, 41.4, 45.4) | 39.8 (36.6, 39.8, 43.5) | -1.8 | 0.0% (1.4%, -1.4%)          |
| 96  | Brazil | Campinas              | 3,300,794 | 3/12/2020 | 83.4 (66.8, 77.4, 94.5) | 78.3 (61.9, 72.7, 90.0) | -5.1 | <b>-3.1% (-0.5%, -5.7%)</b> |
| 97  | Brazil | Campo Grande          | 896,864   | 3/12/2020 | 54.5 (46.2, 52.9, 61.9) | 49.3 (43.3, 48.7, 54.7) | -5.2 | 0.6% (3.4%, -2.2%)          |
| 98  | Brazil | Campos dos Goytacazes | 451,055   | 3/12/2020 | 54.9 (48.7, 53.8, 60.4) | 48.0 (41.9, 46.8, 54.2) | -6.9 | -0.4% (1.3%, -2.0%)         |
| 99  | Brazil | Caruaru               | 331,175   | 3/12/2020 | 41.6 (37.9, 41.0, 44.9) | 38.9 (35.3, 38.7, 42.2) | -2.7 | 0.3% (2.1%, -1.6%)          |
| 100 | Brazil | Cascavel              | 314,244   | 3/12/2020 | 57.3 (49.0, 55.8, 63.8) | 50.3 (43.0, 50.6, 54.7) | -7.1 | -0.7% (1.3%, -2.6%)         |
| 101 | Brazil | Caxias Do Sul         | 483,770   | 3/12/2020 | 64.3 (55.6, 61.7, 69.7) | 57.4 (48.1, 53.7, 60.8) | -6.9 | -0.2% (2.3%, -2.6%)         |
| 102 | Brazil | Cuiab?a               | 588,566   | 3/12/2020 | 54.6 (44.1, 50.2, 59.2) | 50.4 (43.2, 49.1, 56.0) | -4.2 | -0.9% (1.9%, -3.7%)         |
| 103 | Brazil | Curitiba              | 3,678,732 | 3/12/2020 | 72.8 (57.6, 68.9, 83.1) | 68.6 (54.3, 63.6, 78.0) | -4.1 | <b>-3.2% (-0.6%, -5.8%)</b> |
| 104 | Brazil | Feira De Santana      | 602,128   | 3/12/2020 | 46.9 (42.4, 46.2, 51.0) | 42.9 (38.6, 41.8, 47.0) | -4.0 | 0.5% (2.0%, -1.0%)          |
| 105 | Brazil | Florian?olis          | 1,239,331 | 3/12/2020 | 61.9 (52.4, 60.4, 67.5) | 54.5 (47.5, 51.9, 59.1) | -7.4 | -1.6% (0.4%, -3.6%)         |
| 106 | Brazil | Fortaleza             | 4,073,465 | 3/12/2020 | 44.4 (40.7, 44.9, 48.8) | 43.7 (38.3, 42.8, 49.7) | -0.7 | -0.1% (2.2%, -2.3%)         |
| 107 | Brazil | Franca                | 351,926   | 3/12/2020 | 53.2 (45.7, 52.1, 58.7) | 45.9 (40.9, 46.4, 51.2) | -7.3 | 1.0% (3.6%, -1.5%)          |
| 108 | Brazil | Goi?ia                | 2,690,011 | 3/12/2020 | 62.8 (50.4, 58.6, 73.4) | 56.6 (49.1, 55.9, 64.0) | -6.2 | <b>5.1% (9.1%, 1.4%)</b>    |

|     |        |                   |           |           |                         |                         |      |                             |
|-----|--------|-------------------|-----------|-----------|-------------------------|-------------------------|------|-----------------------------|
| 109 | Brazil | Vale do A?        | 521,744   | 3/12/2020 | 75.2 (59.2, 70.5, 84.7) | 69.7 (53.3, 62.1, 73.6) | -5.5 | <b>-3.5% (-0.6%, -6.3%)</b> |
| 110 | Brazil | Jo? Pessoa        | 1,378,249 | 3/12/2020 | 41.9 (38.2, 41.9, 45.4) | 40.4 (36.5, 41.0, 44.3) | -1.5 | 0.3% (1.9%, -1.3%)          |
| 111 | Brazil | Joinville         | 1,303,141 | 3/12/2020 | 63.8 (53.2, 59.9, 70.6) | 57.9 (48.2, 55.0, 63.6) | -6.0 | <b>-3.1% (-0.4%, -5.8%)</b> |
| 112 | Brazil | Juazeiro Do Norte | 461,342   | 3/12/2020 | 42.9 (38.1, 41.5, 46.6) | 39.5 (35.6, 39.1, 42.5) | -3.4 | -1.2% (0.3%, -2.7%)         |
| 113 | Brazil | Juiz De Fora      | 575,481   | 3/12/2020 | 57.4 (49.5, 56.3, 63.1) | 49.6 (43.2, 47.8, 53.2) | -7.8 | -1.4% (0.6%, -3.4%)         |
| 114 | Brazil | Jundia?           | 678,521   | 3/12/2020 | 85.5 (67.8, 79.0, 98.0) | 79.5 (60.5, 73.5, 84.7) | -6.0 | -1.4% (1.9%, -4.6%)         |
| 115 | Brazil | Londrina          | 885,516   | 3/12/2020 | 60.8 (52.0, 58.8, 67.9) | 54.0 (48.0, 53.2, 60.5) | -6.8 | -1.6% (1.1%, -4.2%)         |
| 116 | Brazil | Macap?            | 486,424   | 3/12/2020 | 34.8 (30.4, 35.0, 39.3) | 36.8 (31.5, 37.0, 41.8) | 1.9  | 1.0% (2.8%, -0.7%)          |
| 117 | Brazil | Macei?            | 1,323,039 | 3/12/2020 | 41.5 (37.8, 40.8, 44.9) | 39.5 (34.6, 39.6, 44.0) | -2.0 | <b>3.8% (5.8%, 1.7%)</b>    |
| 118 | Brazil | Manaus            | 2,260,788 | 3/12/2020 | 42.3 (34.8, 40.6, 47.6) | 42.2 (35.5, 42.1, 46.7) | -0.1 | 0.6% (3.2%, -2.0%)          |
| 119 | Brazil | Maring?           | 419,993   | 3/12/2020 | 62.6 (53.2, 61.1, 70.1) | 54.4 (47.7, 54.3, 60.4) | -8.2 | <b>-5.2% (-2.5%, -8.0%)</b> |
| 120 | Brazil | Montes Claros     | 397,815   | 3/12/2020 | 48.8 (43.0, 47.4, 53.5) | 42.1 (37.4, 41.4, 46.1) | -6.8 | 0.4% (2.4%, -1.6%)          |
| 121 | Brazil | Natal             | 1,456,844 | 3/12/2020 | 39.0 (36.4, 38.9, 41.7) | 38.6 (34.9, 38.4, 42.4) | -0.3 | -0.6% (0.9%, -2.0%)         |
| 122 | Brazil | Pelotas           | 326,241   | 3/12/2020 | 60.4 (50.7, 57.6, 66.4) | 55.5 (47.3, 52.8, 60.6) | -4.9 | 0.5% (3.0%, -1.9%)          |
| 123 | Brazil | Petrolina         | 477,235   | 3/12/2020 | 43.8 (39.1, 42.8, 47.7) | 39.5 (36.1, 38.9, 43.1) | -4.3 | 0.4% (2.3%, -1.6%)          |
| 124 | Brazil | Piracicaba        | 401,095   | 3/12/2020 | 70.2 (57.1, 66.1, 78.6) | 66.5 (55.3, 65.2, 72.9) | -3.7 | -0.9% (2.2%, -3.9%)         |
| 125 | Brazil | Ponta Grossa      | 349,363   | 3/12/2020 | 56.7 (49.3, 55.9, 62.8) | 52.0 (44.2, 52.2, 58.0) | -4.7 | -1.9% (0.7%, -4.4%)         |
| 126 | Brazil | P?to Alegre       | 4,137,418 | 3/12/2020 | 75.8 (60.9, 71.9, 83.9) | 68.2 (55.4, 63.4, 77.2) | -7.6 | -1.8% (1.0%, -4.5%)         |
| 127 | Brazil | P?to Velho        | 510,419   | 3/12/2020 | 41.9 (34.3, 38.4, 45.7) | 40.4 (33.4, 38.0, 44.6) | -1.5 | 0.8% (3.7%, -2.0%)          |
| 128 | Brazil | Recife            | 4,127,092 | 3/12/2020 | 42.4 (38.2, 42.3, 46.2) | 42.6 (37.8, 41.8, 46.7) | 0.2  | -0.4% (1.8%, -2.6%)         |

|     |        |                     |            |           |                             |                             |       |                             |
|-----|--------|---------------------|------------|-----------|-----------------------------|-----------------------------|-------|-----------------------------|
| 129 | Brazil | Ribeir? Preto       | 714,111    | 3/12/2020 | 61.6 (52.2, 60.3, 69.4)     | 56.0 (50.8, 55.1, 61.1)     | -5.7  | -0.9% (1.6%, -3.2%)         |
| 130 | Brazil | Rio Branco          | 370,129    | 3/12/2020 | 39.0 (33.7, 37.3, 42.2)     | 37.9 (33.3, 36.8, 41.8)     | -1.1  | 1.0% (3.0%, -1.0%)          |
| 131 | Brazil | Rio de Janeiro      | 13,458,075 | 3/12/2020 | 102.6 (77.0, 94.9, 118.0)   | 91.2 (68.8, 81.9, 103.0)    | -11.4 | <b>-6.0% (-2.8%, -9.1%)</b> |
| 132 | Brazil | Salvador            | 3,839,076  | 3/12/2020 | 49.8 (43.4, 48.4, 54.9)     | 43.4 (37.6, 42.3, 46.1)     | -6.3  | 1.2% (3.1%, -0.6%)          |
| 133 | Brazil | Baixada Santista    | 1,892,314  | 3/12/2020 | 116.7 (66.0, 85.9, 123.5)   | 114.5 (66.1, 95.4, 141.9)   | -2.2  | -2.2% (4.7%, -8.6%)         |
| 134 | Brazil | S? Jos?do Rio Preto | 439,018    | 3/12/2020 | 61.0 (51.5, 58.5, 69.5)     | 54.0 (48.0, 52.6, 59.5)     | -7.0  | -1.6% (1.6%, -4.7%)         |
| 135 | Brazil | S? Jos?dos Campos   | 721,795    | 3/12/2020 | 79.2 (63.1, 74.4, 89.9)     | 81.7 (64.2, 74.3, 92.5)     | 2.6   | -1.4% (1.4%, -4.1%)         |
| 136 | Brazil | Grande S? Lu?       | 1,485,763  | 3/12/2020 | 38.0 (34.5, 38.5, 41.6)     | 40.3 (34.5, 39.6, 44.7)     | 2.3   | -1.1% (1.6%, -3.7%)         |
| 137 | Brazil | S? Paulo            | 22,043,028 | 3/12/2020 | 158.4 (100.3, 131.8, 191.2) | 150.7 (103.4, 130.4, 173.5) | -7.7  | <b>-4.3% (0.0%, -8.4%)</b>  |
| 138 | Brazil | Sorocaba            | 785,997    | 3/12/2020 | 74.7 (60.5, 70.4, 81.7)     | 73.6 (58.0, 68.0, 82.6)     | -1.1  | -1.9% (0.9%, -4.6%)         |
| 139 | Brazil | Taubat?e            | 312,617    | 3/12/2020 | 64.3 (55.8, 62.8, 70.7)     | 61.0 (51.9, 58.1, 69.5)     | -3.4  | -1.2% (0.9%, -3.2%)         |
| 140 | Brazil | Teresina            | 1,021,229  | 3/12/2020 | 44.8 (38.4, 43.5, 50.2)     | 42.1 (37.2, 41.5, 46.1)     | -2.7  | <b>-1.5% (0.0%, -3.0%)</b>  |
| 141 | Brazil | Uberaba             | 333,487    | 3/12/2020 | 54.1 (45.8, 51.9, 60.7)     | 46.5 (42.0, 46.4, 51.9)     | -7.5  | 0.3% (2.4%, -1.8%)          |
| 142 | Brazil | Uberl?dia           | 686,896    | 3/12/2020 | 57.4 (48.6, 55.6, 64.8)     | 50.1 (44.8, 49.2, 56.4)     | -7.3  | -0.7% (1.5%, -2.8%)         |
| 143 | Brazil | Grande Vit?ia       | 2,075,857  | 3/12/2020 | 67.3 (53.3, 63.8, 77.8)     | 58.3 (45.7, 54.1, 68.4)     | -9.0  | -0.9% (1.7%, -3.5%)         |
| 144 | Brazil | Vit?ia da Conquista | 327,672    | 3/12/2020 | 45.1 (39.5, 43.6, 48.7)     | 40.2 (36.8, 39.1, 43.1)     | -4.9  | 1.5% (3.5%, -0.5%)          |
| 145 | Brazil | Volta Redonda       | 445,226    | 3/12/2020 | 74.9 (60.3, 70.7, 84.7)     | 72.3 (56.5, 67.3, 80.6)     | -2.6  | -0.7% (2.1%, -3.5%)         |

|     |              |                              |           |           |                            |                            |       |                             |
|-----|--------------|------------------------------|-----------|-----------|----------------------------|----------------------------|-------|-----------------------------|
| 146 | Bulgaria     | Plovdiv                      | 346,563   | 2/3/2020  | 93.4 (78.6, 88.7, 102.0)   | 85.5 (74.2, 82.5, 92.4)    | -7.9  | 0.7% (3.2%, -1.9%)          |
| 147 | Bulgaria     | Sofia                        | 1,280,968 | 2/3/2020  | 116.6 (82.2, 95.0, 120.8)  | 96.3 (72.7, 83.4, 101.8)   | -20.2 | 4.7% (11.2%, -1.4%)         |
| 148 | Bulgaria     | Varna                        | 335,068   | 2/3/2020  | 75.0 (64.4, 76.2, 86.0)    | 74.6 (68.2, 75.2, 81.9)    | -0.4  | -2.0% (0.2%, -4.2%)         |
| 149 | Burkina Faso | Bobo-Dioulasso               | 972,124   | 3/12/2020 | 51.7 (45.0, 50.7, 56.8)    | 54.8 (48.0, 54.2, 58.5)    | 3.0   | 0.0% (1.3%, -1.2%)          |
| 150 | Burkina Faso | Ouagadougou                  | 2,780,331 | 3/12/2020 | 64.4 (55.8, 62.5, 71.4)    | 66.9 (56.7, 66.0, 71.9)    | 2.5   | 1.5% (3.1%, -0.1%)          |
| 151 | Burundi      | Bujumbura                    | 1,012,996 | 3/5/2020  | 46.0 (38.6, 46.1, 52.5)    | 49.1 (41.5, 49.1, 56.8)    | 3.1   | 4.2% (39.8%, -22.4%)        |
| 152 | Cambodia     | Phnum P?h (Phnom Penh)       | 2,077,757 | 3/7/2020  | 89.8 (63.2, 82.0, 108.8)   | 87.3 (69.2, 82.1, 98.8)    | -2.5  | 2.8% (6.9%, -1.2%)          |
| 153 | Cameroon     | Bafoussam                    | 423,982   | 3/13/2020 | 47.7 (40.1, 45.7, 55.3)    | 43.4 (38.8, 43.4, 48.0)    | -4.4  | 0.3% (2.9%, -2.1%)          |
| 154 | Cameroon     | Bamenda                      | 533,257   | 3/13/2020 | 47.5 (38.8, 45.9, 54.6)    | 41.1 (36.7, 42.3, 47.3)    | -6.5  | -1.1% (1.6%, -3.7%)         |
| 155 | Cameroon     | Douala                       | 3,663,227 | 3/13/2020 | 60.6 (48.7, 59.4, 70.8)    | 55.1 (47.1, 52.6, 64.8)    | -5.5  | -0.6% (2.4%, -3.5%)         |
| 156 | Cameroon     | Garoua                       | 345,853   | 3/13/2020 | 52.7 (46.1, 52.1, 59.8)    | 57.3 (50.1, 58.3, 64.5)    | 4.6   | 1.7% (4.9%, -1.4%)          |
| 157 | Cameroon     | Yaoundé                      | 3,992,411 | 3/13/2020 | 52.6 (44.1, 50.8, 60.1)    | 49.8 (44.1, 50.1, 55.6)    | -2.8  | <b>2.9% (5.6%, 0.3%)</b>    |
| 158 | Cameroon     | Loum                         | 497,578   | 3/13/2020 | 46.4 (39.4, 44.9, 52.1)    | 42.9 (40.0, 43.3, 46.6)    | -3.5  | -1.0% (1.1%, -3.0%)         |
| 159 | Cameroon     | Mbouda                       | 485,660   | 3/13/2020 | 48.1 (39.8, 46.2, 55.0)    | 42.7 (38.2, 42.9, 48.7)    | -5.4  | 1.2% (4.1%, -1.6%)          |
| 160 | Canada       | Calgary                      | 1,547,484 | 1/22/2020 | 111.2 (73.6, 92.5, 119.6)  | 94.2 (71.0, 84.3, 107.3)   | -17.0 | -2.7% (3.6%, -8.6%)         |
| 161 | Canada       | Edmonton                     | 1,461,182 | 1/22/2020 | 139.1 (76.4, 97.8, 132.8)  | 118.5 (69.6, 93.1, 131.2)  | -20.6 | <b>-4.8% (-0.5%, -8.9%)</b> |
| 162 | Canada       | Halifax                      | 412,674   | 1/22/2020 | 66.4 (51.1, 68.2, 81.1)    | 69.7 (59.8, 68.4, 78.9)    | 3.4   | 0.2% (4.8%, -4.2%)          |
| 163 | Canada       | Hamilton                     | 766,688   | 1/22/2020 | 124.8 (85.4, 109.0, 144.0) | 112.3 (88.3, 106.6, 132.2) | -12.4 | -0.8% (5.4%, -6.6%)         |
| 164 | Canada       | Kitchener-Cambridge-Waterloo | 562,466   | 1/22/2020 | 98.6 (62.6, 81.3, 101.6)   | 91.4 (67.3, 82.5, 98.2)    | -7.2  | -0.6% (7.4%, -8.1%)         |

|     |                          |                        |           |           |                             |                             |       |                              |
|-----|--------------------------|------------------------|-----------|-----------|-----------------------------|-----------------------------|-------|------------------------------|
| 165 | Canada                   | London                 | 508,230   | 1/22/2020 | 99.4 (68.4, 85.2, 107.8)    | 93.7 (71.6, 86.6, 101.8)    | -5.7  | -2.7% (4.4%, -9.3%)          |
| 166 | Canada                   | Montreal               | 4,220,566 | 1/22/2020 | 138.9 (84.1, 101.0, 143.8)  | 114.2 (81.5, 97.0, 119.0)   | -24.7 | -1.4% (2.4%, -5.1%)          |
| 167 | Canada                   | Oshawa                 | 398,459   | 1/22/2020 | 112.1 (76.2, 94.4, 123.8)   | 101.9 (72.6, 89.3, 117.5)   | -10.2 | <b>-8.8% (-1.3%, -15.8%)</b> |
| 168 | Canada                   | Ottawa-Gatineau        | 1,393,086 | 1/22/2020 | 92.5 (64.2, 79.0, 99.9)     | 84.1 (63.3, 77.9, 92.0)     | -8.4  | -2.1% (3.2%, -7.1%)          |
| 169 | Canada                   | Qu?ec                  | 826,109   | 1/22/2020 | 86.7 (62.5, 75.9, 90.2)     | 77.8 (65.2, 74.7, 87.3)     | -8.9  | <b>-6.9% (-2.3%, -11.4%)</b> |
| 170 | Canada                   | Saskatoon              | 324,721   | 1/22/2020 | 68.7 (52.3, 67.2, 82.5)     | 68.5 (55.8, 69.9, 78.3)     | -0.2  | -2.6% (2.2%, -7.1%)          |
| 171 | Canada                   | St. Catharines-Niagara | 416,049   | 1/22/2020 | 108.9 (79.6, 97.2, 118.8)   | 102.2 (81.3, 92.5, 108.0)   | -6.7  | -0.8% (5.5%, -6.7%)          |
| 172 | Canada                   | Toronto                | 6,196,731 | 1/22/2020 | 145.6 (91.9, 118.1, 165.6)  | 134.0 (93.7, 111.9, 149.6)  | -11.6 | <b>-9.5% (-3.0%, -15.7%)</b> |
| 173 | Canada                   | Vancouver              | 2,581,079 | 1/22/2020 | 132.4 (93.4, 120.4, 156.3)  | 115.0 (82.7, 108.8, 132.9)  | -17.4 | 2.4% (10.9%, -5.4%)          |
| 174 | Canada                   | Victoria               | 385,999   | 1/22/2020 | 86.2 (67.8, 82.8, 95.8)     | 77.9 (63.3, 78.4, 88.7)     | -8.3  | -4.4% (1.9%, -10.3%)         |
| 175 | Canada                   | Windsor                | 336,082   | 1/22/2020 | 139.1 (90.5, 115.6, 148.5)  | 110.1 (86.5, 102.6, 123.5)  | -28.9 | -5.2% (1.3%, -11.4%)         |
| 176 | Canada                   | Winnipeg               | 816,593   | 1/22/2020 | 74.8 (53.1, 72.7, 91.4)     | 78.8 (60.2, 75.4, 90.1)     | 4.0   | <b>-4.4% (-0.3%, -8.2%)</b>  |
| 177 | Central African Republic | Bangui                 | 889,231   | 3/26/2020 | 54.4 (40.1, 49.0, 65.9)     | 45.2 (40.5, 45.7, 49.7)     | -9.2  | <b>-4.4% (-0.7%, -8.1%)</b>  |
| 178 | Chad                     | N'Djam?a               | 1,422,547 | 3/8/2020  | 59.4 (50.2, 57.1, 66.1)     | 68.1 (57.0, 66.8, 76.8)     | 8.8   | 1.1% (2.4%, -0.1%)           |
| 179 | Chile                    | Antofagasta            | 438,871   | 3/15/2020 | 51.1 (47.1, 50.5, 54.9)     | 49.3 (44.4, 48.2, 53.1)     | -1.8  | 0.7% (2.1%, -0.7%)           |
| 180 | Chile                    | Santiago               | 6,767,223 | 3/15/2020 | 259.9 (127.0, 163.0, 284.7) | 316.2 (162.9, 279.8, 438.4) | 56.3  | -4.1% (0.6%, -8.5%)          |
| 181 | Chile                    | Temuco                 | 341,951   | 3/15/2020 | 66.7 (58.0, 65.2, 72.1)     | 66.2 (52.7, 63.8, 74.0)     | -0.5  | -0.7% (0.2%, -1.7%)          |
| 182 | Chile                    | Valpara?o              | 983,751   | 3/15/2020 | 79.7 (61.4, 68.8, 85.2)     | 82.8 (59.6, 75.3, 95.2)     | 3.2   | -2.3% (1.6%, -6.1%)          |
| 183 | Chile                    | Concepci?              | 880,722   | 3/15/2020 | 73.5 (62.1, 70.4, 81.2)     | 74.9 (58.1, 71.6, 89.2)     | 1.4   | 0.9% (2.7%, -0.9%)           |



|     |       |                    |            |           |                             |                             |        |                              |
|-----|-------|--------------------|------------|-----------|-----------------------------|-----------------------------|--------|------------------------------|
| 184 | Chile | La Serena-Coquimbo | 483,640    | 3/15/2020 | 56.1 (51.0, 56.1, 60.7)     | 52.8 (47.2, 51.9, 56.9)     | -3.3   | -0.2% (1.6%, -2.0%)          |
| 185 | China | Akesu              | 413,258    | 1/22/2020 | 93.8 (79.4, 91.9, 105.5)    | 82.1 (69.1, 81.6, 93.4)     | -11.7  | <b>3.4% (6.4%, 0.5%)</b>     |
| 186 | China | Anqing             | 726,950    | 1/22/2020 | 195.0 (101.6, 128.5, 183.2) | 120.3 (91.8, 106.3, 138.4)  | -74.7  | -4.3% (0.1%, -8.5%)          |
| 187 | China | Anshan             | 1,629,166  | 1/22/2020 | 255.4 (159.3, 216.0, 314.2) | 230.9 (138.2, 189.4, 289.7) | -24.5  | -1.4% (2.7%, -5.3%)          |
| 188 | China | Anshun             | 600,121    | 1/22/2020 | 80.4 (63.6, 75.7, 90.7)     | 84.5 (67.3, 78.6, 94.2)     | 4.1    | <b>-3.2% (-0.8%, -5.6%)</b>  |
| 189 | China | Anyang             | 1,460,114  | 1/22/2020 | 262.5 (163.0, 219.1, 308.3) | 193.8 (137.7, 174.4, 226.8) | -68.8  | -3.2% (1.1%, -7.4%)          |
| 190 | China | Baicheng           | 332,826    | 1/22/2020 | 84.7 (67.8, 80.6, 92.3)     | 81.6 (63.3, 81.7, 93.6)     | -3.1   | <b>-3.2% (-0.5%, -5.8%)</b>  |
| 191 | China | Baiyin             | 404,637    | 1/22/2020 | 123.5 (92.2, 110.7, 144.5)  | 112.0 (90.0, 105.1, 126.4)  | -11.5  | <b>-3.0% (-0.5%, -5.5%)</b>  |
| 192 | China | Baoding            | 1,975,790  | 1/22/2020 | 297.0 (155.4, 214.1, 343.9) | 178.9 (124.8, 157.9, 213.5) | -118.1 | <b>-6.0% (-1.3%, -10.5%)</b> |
| 193 | China | Baoji              | 1,164,665  | 1/22/2020 | 158.7 (102.9, 125.4, 168.0) | 110.6 (87.0, 100.4, 120.5)  | -48.1  | <b>-5.6% (-1.2%, -9.7%)</b>  |
| 194 | China | Baotou             | 2,190,495  | 1/22/2020 | 284.7 (154.4, 230.7, 363.3) | 242.5 (127.5, 201.4, 308.4) | -42.2  | -4.2% (0.6%, -8.8%)          |
| 195 | China | Beihai             | 486,986    | 1/22/2020 | 81.7 (68.9, 76.2, 89.3)     | 74.4 (62.9, 69.8, 81.9)     | -7.3   | 1.9% (4.7%, -0.9%)           |
| 196 | China | Beijing            | 20,462,610 | 1/22/2020 | 304.7 (163.2, 241.5, 379.4) | 199.4 (128.3, 173.9, 245.4) | -105.3 | <b>-7.6% (-3.4%, -11.7%)</b> |
| 197 | China | Bengbu             | 901,773    | 1/22/2020 | 211.1 (123.8, 158.9, 232.9) | 138.6 (98.7, 127.3, 154.9)  | -72.6  | <b>-7.6% (-3.9%, -11.2%)</b> |
| 198 | China | Benxi              | 1,157,413  | 1/22/2020 | 241.7 (142.9, 199.1, 296.9) | 204.1 (128.2, 181.0, 249.3) | -37.5  | -2.3% (1.8%, -6.3%)          |
| 199 | China | Botou              | 394,574    | 1/22/2020 | 205.8 (121.4, 154.2, 239.1) | 141.6 (109.0, 130.0, 156.9) | -64.2  | <b>-5.4% (-1.3%, -9.3%)</b>  |
| 200 | China | Cangzhou           | 560,962    | 1/22/2020 | 231.1 (140.9, 180.4, 273.5) | 156.8 (119.8, 146.0, 181.3) | -74.3  | <b>-5.9% (-1.8%, -9.7%)</b>  |
| 201 | China | Changchun          | 4,425,761  | 1/22/2020 | 158.0 (108.6, 137.0, 180.4) | 148.4 (95.8, 125.5, 175.8)  | -9.6   | <b>-6.9% (-3.3%, -10.3%)</b> |
| 202 | China | Changde            | 830,010    | 1/22/2020 | 144.6 (88.7, 104.3, 149.8)  | 110.8 (81.8, 104.9, 126.2)  | -33.8  | <b>-4.4% (-0.6%, -8.0%)</b>  |
| 203 | China | Changji            | 393,243    | 1/22/2020 | 409.3 (112.6, 160.9, 446.8) | 194.1 (95.5, 116.6, 207.0)  | -215.3 | -0.6% (5.5%, -6.3%)          |
| 204 | China | Changsha           | 4,577,723  | 1/22/2020 | 182.6 (105.4, 134.6, 204.6) | 128.5 (95.5, 120.5, 149.1)  | -54.1  | -1.8% (3.2%, -6.5%)          |
| 205 | China | Changzhi           | 846,365    | 1/22/2020 | 197.6 (125.2, 163.4, 223.9) | 158.0 (113.9, 141.7, 188.2) | -39.7  | <b>-6.5% (-3.7%, -9.2%)</b>  |

|     |       |                    |            |           |                             |                             |       |                                |
|-----|-------|--------------------|------------|-----------|-----------------------------|-----------------------------|-------|--------------------------------|
| 206 | China | Changzhou, Jiangsu | 3,625,328  | 1/22/2020 | 297.1 (167.1, 227.0, 349.2) | 220.5 (139.1, 194.6, 277.2) | -76.6 | -0.2% (6.1%, -6.2%)            |
| 207 | China | Chaoyang           | 539,052    | 1/22/2020 | 131.0 (92.4, 112.7, 140.9)  | 114.1 (90.9, 109.2, 128.6)  | -16.9 | <b>-5.9% (-2.8%, -8.9%)</b>    |
| 208 | China | Chaozhou           | 1,428,383  | 1/22/2020 | 108.7 (83.4, 99.1, 118.3)   | 97.4 (81.9, 93.5, 107.8)    | -11.3 | -0.6% (2.5%, -3.6%)            |
| 209 | China | Chengde            | 880,494    | 1/22/2020 | 155.0 (93.3, 122.9, 177.5)  | 118.2 (86.0, 106.2, 134.9)  | -36.8 | <b>-8.9% (-5.1%, -12.5%)</b>   |
| 210 | China | Chengdu            | 9,135,768  | 1/22/2020 | 314.0 (172.2, 252.0, 387.8) | 250.5 (181.0, 232.6, 316.9) | -63.5 | 1.3% (7.7%, -4.7%)             |
| 211 | China | Chenzhou           | 959,881    | 1/22/2020 | 129.2 (76.9, 91.7, 125.6)   | 91.8 (68.6, 80.4, 102.6)    | -37.3 | <b>-4.5% (-0.1%, -8.7%)</b>    |
| 212 | China | Chifeng            | 1,164,793  | 1/22/2020 | 102.6 (75.9, 93.0, 116.3)   | 94.3 (71.9, 91.0, 110.3)    | -8.3  | -3.0% (0.2%, -6.1%)            |
| 213 | China | Chongqing          | 15,872,179 | 1/22/2020 | 280.6 (164.7, 214.5, 305.8) | 202.4 (137.8, 175.7, 235.9) | -78.2 | <b>-10.5% (-6.6%, -14.3%)</b>  |
| 214 | China | Chuxiong           | 500,867    | 1/22/2020 | 60.5 (51.0, 58.3, 67.3)     | 59.9 (51.3, 59.4, 66.1)     | -0.6  | -1.0% (0.5%, -2.5%)            |
| 215 | China | Chuzhou            | 522,062    | 1/22/2020 | 196.5 (111.6, 145.7, 235.1) | 146.6 (101.0, 121.0, 172.7) | -50.0 | 3.5% (9.5%, -2.1%)             |
| 216 | China | Dali               | 514,610    | 1/22/2020 | 60.1 (52.0, 58.6, 67.9)     | 59.6 (52.1, 58.2, 64.9)     | -0.5  | -0.7% (0.8%, -2.1%)            |
| 217 | China | Dalian             | 5,617,849  | 1/22/2020 | 178.6 (109.0, 141.6, 202.9) | 130.0 (95.8, 115.7, 145.7)  | -48.6 | <b>-5.5% (-2.0%, -9.0%)</b>    |
| 218 | China | Dandong            | 877,258    | 1/22/2020 | 122.0 (85.6, 103.8, 137.8)  | 98.5 (74.8, 92.4, 106.8)    | -23.5 | <b>-6.0% (-3.2%, -8.6%)</b>    |
| 219 | China | Daqing             | 1,859,001  | 1/22/2020 | 108.6 (82.0, 95.5, 113.0)   | 97.8 (76.7, 89.7, 110.5)    | -10.8 | <b>-8.0% (-5.7%, -10.2%)</b>   |
| 220 | China | Datong             | 1,745,333  | 1/22/2020 | 197.6 (113.4, 158.4, 236.3) | 148.3 (100.3, 127.3, 179.6) | -49.2 | <b>-14.6% (-10.4%, -18.6%)</b> |
| 221 | China | Dezhou             | 986,192    | 1/22/2020 | 211.6 (132.2, 163.8, 252.4) | 149.8 (111.8, 128.4, 172.7) | -61.8 | <b>-4.3% (-0.1%, -8.2%)</b>    |
| 222 | China | Dongguan           | 7,407,852  | 1/22/2020 | 204.1 (136.1, 169.0, 228.0) | 154.6 (107.7, 135.4, 180.2) | -49.5 | 1.6% (8.2%, -4.5%)             |
| 223 | China | Emeishan           | 368,194    | 1/22/2020 | 155.5 (102.2, 131.5, 184.4) | 122.6 (97.9, 115.2, 137.4)  | -33.0 | <b>-4.5% (-1.0%, -7.9%)</b>    |
| 224 | China | Foshan             | 7,326,852  | 1/22/2020 | 246.9 (146.0, 198.2, 273.2) | 162.0 (109.7, 134.7, 188.1) | -85.0 | 2.0% (9.0%, -4.5%)             |
| 225 | China | Fujin              | 329,544    | 1/22/2020 | 79.6 (62.5, 75.4, 88.7)     | 75.3 (62.3, 73.0, 82.6)     | -4.3  | -2.0% (0.9%, -4.8%)            |

|     |       |                      |            |           |                             |                             |        |                               |
|-----|-------|----------------------|------------|-----------|-----------------------------|-----------------------------|--------|-------------------------------|
| 226 | China | Fushun, Liaoning     | 1,285,387  | 1/22/2020 | 193.7 (116.4, 157.3, 235.7) | 149.2 (104.1, 125.5, 178.7) | -44.5  | <b>-5.7% (-1.8%, -9.4%)</b>   |
| 227 | China | Fuxin                | 839,189    | 1/22/2020 | 128.9 (88.5, 106.1, 141.1)  | 114.0 (86.7, 104.1, 130.7)  | -14.9  | <b>-5.0% (-1.5%, -8.5%)</b>   |
| 228 | China | Fuyang               | 1,036,162  | 1/22/2020 | 200.2 (117.4, 145.8, 215.5) | 127.8 (100.9, 118.8, 145.0) | -72.4  | <b>-10.5% (-7.2%, -13.7%)</b> |
| 229 | China | Fuzhou, Fujian       | 3,685,701  | 1/22/2020 | 115.4 (83.2, 103.3, 131.8)  | 107.0 (83.4, 100.6, 122.7)  | -8.4   | <b>-6.1% (-3.3%, -8.9%)</b>   |
| 230 | China | Fuzhou, Jiangxi      | 989,880    | 1/22/2020 | 131.2 (80.5, 92.3, 129.1)   | 91.1 (73.8, 86.9, 101.3)    | -40.1  | -3.2% (1.2%, -7.5%)           |
| 231 | China | Ganzhou              | 1,285,039  | 1/22/2020 | 102.0 (77.8, 90.8, 110.6)   | 88.3 (68.6, 80.8, 96.3)     | -13.7  | -2.4% (0.8%, -5.4%)           |
| 232 | China | Guangzhou, Guangdong | 13,301,532 | 1/22/2020 | 242.2 (149.9, 191.0, 274.7) | 171.1 (117.2, 142.0, 199.8) | -71.2  | -3.9% (0.7%, -8.2%)           |
| 233 | China | Guilin               | 1,134,393  | 1/22/2020 | 105.0 (79.9, 94.0, 115.3)   | 93.6 (71.2, 83.4, 108.0)    | -11.4  | <b>-5.3% (-2.9%, -7.7%)</b>   |
| 234 | China | Guiyang              | 3,317,110  | 1/22/2020 | 114.1 (81.1, 97.9, 129.5)   | 103.0 (78.4, 97.2, 118.7)   | -11.2  | 1.3% (4.9%, -2.2%)            |
| 235 | China | Hami                 | 398,946    | 1/22/2020 | 84.7 (74.2, 83.8, 93.9)     | 82.9 (72.4, 82.7, 90.6)     | -1.8   | -0.5% (1.4%, -2.3%)           |
| 236 | China | Handan               | 2,726,835  | 1/22/2020 | 322.6 (171.0, 251.8, 380.2) | 211.8 (147.6, 186.0, 229.7) | -110.9 | <b>-7.1% (-3.1%, -11.0%)</b>  |
| 237 | China | Hangzhou             | 7,642,147  | 1/22/2020 | 289.3 (165.6, 233.4, 342.8) | 190.0 (121.2, 163.8, 229.8) | -99.3  | 0.5% (6.7%, -5.3%)            |
| 238 | China | Hanzhong             | 605,327    | 1/22/2020 | 107.3 (82.3, 98.4, 122.8)   | 93.8 (73.3, 91.5, 106.5)    | -13.5  | <b>-4.7% (-1.9%, -7.3%)</b>   |
| 239 | China | Hebi                 | 565,986    | 1/22/2020 | 244.2 (135.0, 186.0, 294.4) | 161.8 (111.7, 139.0, 200.6) | -82.5  | <b>-9.4% (-5.5%, -13.2%)</b>  |
| 240 | China | Hechi                | 415,022    | 1/22/2020 | 77.5 (62.4, 71.6, 83.7)     | 77.6 (63.4, 71.9, 85.4)     | 0.1    | <b>-2.4% (-0.2%, -4.5%)</b>   |
| 241 | China | Hefei                | 4,241,514  | 1/22/2020 | 242.8 (140.3, 181.7, 275.9) | 157.1 (102.7, 133.8, 184.5) | -85.7  | <b>-11.0% (-7.2%, -14.6%)</b> |
| 242 | China | Hegang               | 638,855    | 1/22/2020 | 88.3 (61.5, 77.8, 96.7)     | 77.7 (62.9, 76.2, 87.6)     | -10.6  | <b>-4.6% (-1.1%, -7.9%)</b>   |
| 243 | China | Hengshui             | 856,705    | 1/22/2020 | 240.9 (137.3, 183.5, 293.6) | 152.6 (115.4, 135.2, 176.8) | -88.4  | <b>-5.6% (-1.5%, -9.5%)</b>   |
| 244 | China | Hengyang             | 1,527,107  | 1/22/2020 | 158.0 (92.2, 115.3, 171.4)  | 111.7 (80.7, 103.4, 129.9)  | -46.3  | <b>-5.4% (-1.6%, -9.0%)</b>   |
| 245 | China | Heyuan               | 523,818    | 1/22/2020 | 96.4 (75.0, 87.6, 105.3)    | 90.7 (74.4, 85.5, 100.7)    | -5.7   | -2.2% (0.4%, -4.8%)           |
| 246 | China | Heze                 | 795,246    | 1/22/2020 | 212.3 (126.5, 167.6, 239.6) | 145.3 (108.3, 130.4, 166.9) | -67.0  | -2.3% (2.5%, -6.8%)           |

|     |       |                  |           |           |                             |                             |       |                              |
|-----|-------|------------------|-----------|-----------|-----------------------------|-----------------------------|-------|------------------------------|
| 247 | China | Huai'an          | 2,655,320 | 1/22/2020 | 179.0 (110.2, 149.3, 211.9) | 127.7 (95.0, 118.4, 143.5)  | -51.3 | -2.7% (1.9%, -7.2%)          |
| 248 | China | Huaipei          | 1,141,734 | 1/22/2020 | 195.0 (118.0, 151.7, 218.1) | 133.1 (97.7, 115.4, 148.0)  | -61.9 | <b>-8.0% (-4.5%, -11.4%)</b> |
| 249 | China | Huaihua          | 751,803   | 1/22/2020 | 105.7 (76.9, 90.4, 114.3)   | 95.4 (74.5, 89.0, 110.2)    | -10.3 | -1.1% (2.2%, -4.3%)          |
| 250 | China | Huainan          | 1,437,838 | 1/22/2020 | 189.0 (112.5, 147.9, 201.8) | 129.4 (97.4, 119.6, 151.1)  | -59.6 | <b>-5.0% (-1.4%, -8.4%)</b>  |
| 251 | China | Huangshan        | 398,406   | 1/22/2020 | 115.0 (73.2, 81.8, 99.1)    | 84.5 (69.0, 79.3, 90.3)     | -30.5 | -3.4% (0.4%, -7.1%)          |
| 252 | China | Huangshi         | 828,324   | 1/22/2020 | 203.3 (120.7, 151.7, 209.3) | 139.1 (101.4, 132.9, 166.2) | -64.3 | 0.5% (5.2%, -3.9%)           |
| 253 | China | Hohhot           | 2,163,394 | 1/22/2020 | 219.5 (124.8, 166.5, 278.6) | 148.6 (96.9, 135.2, 187.9)  | -70.9 | <b>-9.9% (-6.0%, -13.5%)</b> |
| 254 | China | Huizhou          | 2,524,543 | 1/22/2020 | 135.5 (100.8, 117.6, 146.3) | 117.4 (88.3, 115.0, 141.4)  | -18.1 | <b>-5.4% (-2.4%, -8.3%)</b>  |
| 255 | China | Huzhou           | 988,351   | 1/22/2020 | 224.9 (127.0, 174.0, 256.0) | 168.5 (115.5, 146.1, 197.5) | -56.5 | 4.6% (10.5%, -0.9%)          |
| 256 | China | Jiamusi          | 715,965   | 1/22/2020 | 96.2 (70.1, 84.0, 103.9)    | 88.6 (71.2, 85.0, 100.4)    | -7.6  | <b>-3.9% (-0.2%, -7.5%)</b>  |
| 257 | China | Ji'an, Jiangxi   | 435,064   | 1/22/2020 | 121.8 (81.2, 94.5, 128.6)   | 94.9 (74.7, 87.8, 103.1)    | -26.9 | -1.7% (4.1%, -7.1%)          |
| 258 | China | Jiangmen         | 1,687,310 | 1/22/2020 | 193.2 (105.9, 148.6, 234.5) | 119.0 (85.5, 104.1, 131.3)  | -74.2 | 0.4% (7.0%, -5.7%)           |
| 259 | China | Jiaozuo          | 766,770   | 1/22/2020 | 277.8 (137.6, 203.4, 294.1) | 194.5 (125.2, 162.2, 226.7) | -83.3 | <b>-8.5% (-4.6%, -12.2%)</b> |
| 260 | China | Jiaxing          | 1,259,844 | 1/22/2020 | 233.1 (129.6, 175.2, 288.0) | 170.4 (122.4, 154.5, 197.4) | -62.7 | <b>6.5% (12.4%, 1.0%)</b>    |
| 261 | China | Jiayuguan        | 336,493   | 1/22/2020 | 98.3 (74.8, 87.8, 104.6)    | 89.4 (74.2, 85.4, 100.1)    | -8.9  | <b>3.7% (6.4%, 1.0%)</b>     |
| 262 | China | Jilin            | 1,603,332 | 1/22/2020 | 144.3 (98.0, 125.1, 161.5)  | 127.1 (95.5, 111.7, 145.3)  | -17.1 | <b>-5.6% (-2.3%, -8.7%)</b>  |
| 263 | China | Ji'nan, Shandong | 5,360,185 | 1/22/2020 | 288.4 (175.5, 228.2, 342.0) | 193.3 (134.4, 163.5, 237.7) | -95.1 | <b>-7.6% (-2.9%, -12.1%)</b> |
| 264 | China | Jingdezhen       | 396,297   | 1/22/2020 | 135.0 (84.8, 97.8, 126.2)   | 103.2 (76.3, 91.3, 114.1)   | -31.8 | -1.6% (3.0%, -6.1%)          |
| 265 | China | Jingmen          | 488,922   | 1/22/2020 | 151.7 (101.2, 123.7, 162.7) | 104.7 (81.1, 102.4, 123.6)  | -47.0 | 3.7% (8.4%, -0.8%)           |
| 266 | China | Jinhua           | 1,122,440 | 1/22/2020 | 182.5 (96.2, 122.2, 170.4)  | 111.7 (87.7, 103.6, 127.5)  | -70.8 | -2.2% (2.5%, -6.7%)          |
| 267 | China | Jining, Shandong | 1,494,249 | 1/22/2020 | 231.1 (138.3, 182.4, 276.2) | 157.4 (115.2, 142.1, 176.2) | -73.7 | <b>-6.1% (-1.5%, -10.4%)</b> |
| 268 | China | Huludao          | 775,322   | 1/22/2020 | 181.7 (103.1, 126.2, 192.0) | 128.7 (95.6, 119.8, 144.3)  | -53.0 | <b>-9.0% (-5.2%, -12.6%)</b> |

|     |       |                    |           |           |                             |                             |       |                              |
|-----|-------|--------------------|-----------|-----------|-----------------------------|-----------------------------|-------|------------------------------|
| 269 | China | Jinzhou            | 1,145,359 | 1/22/2020 | 167.6 (98.2, 124.7, 180.2)  | 126.7 (91.8, 114.1, 150.4)  | -40.9 | <b>-6.6% (-2.7%, -10.4%)</b> |
| 270 | China | Jiujiang           | 913,212   | 1/22/2020 | 161.2 (99.7, 116.8, 168.2)  | 116.3 (89.9, 109.6, 134.3)  | -44.9 | -1.9% (2.6%, -6.3%)          |
| 271 | China | Jixi, Heilongjiang | 949,646   | 1/22/2020 | 99.7 (74.5, 87.1, 103.4)    | 84.8 (69.4, 82.7, 99.8)     | -14.9 | <b>-6.9% (-4.0%, -9.6%)</b>  |
| 272 | China | Jiuquan            | 382,363   | 1/22/2020 | 90.2 (72.9, 83.5, 99.6)     | 82.7 (70.0, 80.4, 89.1)     | -7.5  | 2.6% (5.4%, -0.1%)           |
| 273 | China | Kaifeng            | 1,274,287 | 1/22/2020 | 213.0 (126.5, 172.1, 263.3) | 146.8 (111.3, 134.4, 175.4) | -66.2 | -3.3% (1.4%, -7.7%)          |
| 274 | China | Kaili              | 347,563   | 1/22/2020 | 82.3 (67.0, 77.6, 91.3)     | 79.8 (67.7, 74.8, 89.1)     | -2.5  | <b>-3.3% (-1.3%, -5.3%)</b>  |
| 275 | China | Kelamayi           | 457,422   | 1/22/2020 | 95.5 (75.1, 89.9, 102.6)    | 78.2 (67.4, 77.3, 87.3)     | -17.3 | <b>-6.3% (-4.2%, -8.4%)</b>  |
| 276 | China | Kuerle             | 761,329   | 1/22/2020 | 79.4 (68.1, 77.9, 89.0)     | 74.0 (64.2, 73.9, 82.4)     | -5.3  | -0.8% (0.9%, -2.4%)          |
| 277 | China | Kunming            | 4,443,186 | 1/22/2020 | 112.5 (85.1, 106.8, 131.4)  | 92.2 (72.1, 90.1, 107.5)    | -20.2 | 0.0% (2.8%, -2.7%)           |
| 278 | China | Langfang           | 739,632   | 1/22/2020 | 256.9 (142.5, 193.7, 311.0) | 185.8 (124.6, 160.8, 230.1) | -71.1 | <b>-9.7% (-6.2%, -13.0%)</b> |
| 279 | China | Lanzhou            | 3,080,522 | 1/22/2020 | 216.3 (127.0, 169.3, 275.8) | 159.2 (113.0, 144.2, 189.1) | -57.1 | -3.4% (0.3%, -7.0%)          |
| 280 | China | Lengshuijiang      | 343,568   | 1/22/2020 | 136.6 (85.5, 106.2, 145.0)  | 109.6 (82.2, 102.4, 131.9)  | -27.0 | 2.8% (8.5%, -2.5%)           |
| 281 | China | Leshan             | 986,923   | 1/22/2020 | 157.8 (97.5, 123.6, 175.8)  | 117.7 (92.2, 107.2, 133.6)  | -40.1 | <b>-6.1% (-2.5%, -9.5%)</b>  |
| 282 | China | Lianyungang        | 1,820,127 | 1/22/2020 | 183.4 (119.6, 155.8, 224.9) | 138.0 (105.1, 125.1, 150.8) | -45.5 | <b>-5.4% (-1.5%, -9.2%)</b>  |
| 283 | China | Liaoyang           | 855,663   | 1/22/2020 | 227.7 (140.3, 190.8, 268.8) | 196.5 (124.6, 163.2, 232.0) | -31.2 | -0.4% (4.1%, -4.7%)          |
| 284 | China | Liaoyuan           | 374,789   | 1/22/2020 | 116.4 (86.0, 104.8, 131.4)  | 101.2 (78.7, 96.5, 114.9)   | -15.2 | <b>-6.7% (-4.2%, -9.1%)</b>  |
| 285 | China | Linfen             | 858,103   | 1/22/2020 | 222.9 (130.8, 165.6, 249.1) | 161.2 (116.1, 143.6, 181.0) | -61.7 | <b>-7.9% (-4.5%, -11.2%)</b> |
| 286 | China | Linqing            | 383,372   | 1/22/2020 | 215.0 (125.9, 159.6, 247.6) | 143.1 (110.4, 130.4, 165.2) | -71.9 | -3.1% (1.2%, -7.2%)          |
| 287 | China | Linyi, Shandong    | 1,936,908 | 1/22/2020 | 250.0 (150.6, 211.6, 306.4) | 167.1 (117.2, 154.0, 202.0) | -82.9 | <b>-4.7% (-0.3%, -8.9%)</b>  |
| 288 | China | Lishui, Zhejiang   | 422,306   | 1/22/2020 | 124.6 (83.2, 96.1, 126.4)   | 91.2 (74.6, 87.5, 103.1)    | -33.4 | -0.3% (3.5%, -3.9%)          |
| 289 | China | Liuzhou            | 2,165,257 | 1/22/2020 | 137.2 (92.7, 115.4, 165.6)  | 118.5 (79.6, 95.0, 134.5)   | -18.7 | 0.0% (4.1%, -3.9%)           |
| 290 | China | Longyan            | 691,987   | 1/22/2020 | 99.3 (74.3, 87.7, 110.0)    | 85.5 (66.5, 78.0, 95.5)     | -13.8 | <b>-3.8% (-1.4%, -6.2%)</b>  |
| 291 | China | Loudi              | 639,167   | 1/22/2020 | 159.7 (101.4, 128.2, 181.4) | 124.2 (89.8, 110.7, 144.6)  | -35.5 | <b>-4.8% (-1.0%, -8.5%)</b>  |

|     |       |                   |           |           |                             |                             |        |                              |
|-----|-------|-------------------|-----------|-----------|-----------------------------|-----------------------------|--------|------------------------------|
| 292 | China | Liuan             | 1,195,907 | 1/22/2020 | 159.8 (102.3, 122.3, 167.4) | 118.4 (91.7, 110.7, 139.0)  | -41.4  | <b>-5.8% (-2.3%, -9.2%)</b>  |
| 293 | China | Luohe             | 1,039,941 | 1/22/2020 | 179.2 (116.3, 142.3, 196.3) | 130.2 (94.4, 123.5, 153.9)  | -49.0  | 1.2% (6.4%, -3.6%)           |
| 294 | China | Luoyang           | 2,387,094 | 1/22/2020 | 274.3 (135.8, 184.5, 301.0) | 162.1 (116.6, 146.2, 171.2) | -112.2 | <b>-5.8% (-1.3%, -10.0%)</b> |
| 295 | China | Liupanshui        | 1,077,317 | 1/22/2020 | 95.1 (75.3, 89.6, 107.3)    | 92.7 (75.4, 89.8, 104.1)    | -2.3   | 0.3% (2.8%, -2.2%)           |
| 296 | China | Luzhou            | 822,996   | 1/22/2020 | 173.2 (106.2, 130.5, 183.0) | 132.6 (102.7, 122.6, 153.8) | -40.6  | <b>-7.1% (-3.9%, -10.2%)</b> |
| 297 | China | Ma'anshan         | 1,019,389 | 1/22/2020 | 256.4 (138.4, 189.4, 274.4) | 170.0 (118.4, 150.4, 199.4) | -86.4  | <b>-6.0% (-1.6%, -10.1%)</b> |
| 298 | China | Manzhouli         | 336,643   | 1/22/2020 | 65.4 (53.6, 64.5, 75.7)     | 65.9 (57.1, 65.9, 76.3)     | 0.5    | <b>-3.6% (-1.8%, -5.4%)</b>  |
| 299 | China | Maoming           | 1,204,716 | 1/22/2020 | 90.4 (73.5, 83.4, 98.9)     | 85.1 (71.3, 78.8, 92.7)     | -5.4   | 0.7% (3.4%, -1.9%)           |
| 300 | China | Meizhou           | 397,834   | 1/22/2020 | 99.9 (75.8, 88.1, 110.2)    | 84.8 (70.3, 78.5, 93.6)     | -15.1  | -1.0% (1.8%, -3.7%)          |
| 301 | China | Mianyang, Sichuan | 1,275,851 | 1/22/2020 | 150.4 (101.0, 128.3, 178.3) | 129.0 (102.4, 122.8, 151.0) | -21.4  | <b>-6.5% (-4.1%, -8.9%)</b>  |
| 302 | China | Mudanjiang        | 925,522   | 1/22/2020 | 102.5 (74.7, 87.4, 103.4)   | 88.5 (69.6, 85.4, 101.6)    | -13.9  | -2.9% (0.3%, -5.9%)          |
| 303 | China | Nanchang          | 3,598,421 | 1/22/2020 | 181.8 (104.4, 129.9, 191.9) | 124.4 (94.8, 117.7, 139.9)  | -57.4  | -3.4% (1.4%, -8.0%)          |
| 304 | China | Nanchong          | 1,257,726 | 1/22/2020 | 163.9 (99.9, 123.6, 170.3)  | 111.9 (91.7, 108.4, 129.6)  | -52.0  | <b>-3.9% (0.0%, -7.7%)</b>   |
| 305 | China | Nanjing, Jiangsu  | 8,847,372 | 1/22/2020 | 270.1 (149.6, 205.4, 330.7) | 198.0 (126.5, 170.1, 237.7) | -72.1  | -2.4% (3.7%, -8.2%)          |
| 306 | China | Nanning           | 3,859,608 | 1/22/2020 | 120.8 (83.6, 101.3, 131.8)  | 98.5 (76.6, 89.3, 108.2)    | -22.4  | 1.2% (6.4%, -3.9%)           |
| 307 | China | Nanping           | 491,287   | 1/22/2020 | 78.5 (63.8, 70.8, 83.4)     | 76.2 (62.9, 70.3, 83.7)     | -2.3   | <b>-4.7% (-2.4%, -7.0%)</b>  |
| 308 | China | Nantong           | 2,275,777 | 1/22/2020 | 237.6 (130.2, 183.5, 287.5) | 210.8 (121.9, 180.5, 259.3) | -26.7  | <b>-5.5% (-0.6%, -10.1%)</b> |
| 309 | China | Nanyang, Henan    | 1,142,799 | 1/22/2020 | 184.2 (116.2, 141.6, 189.6) | 122.9 (92.7, 114.4, 147.2)  | -61.2  | <b>-3.8% (-0.2%, -7.2%)</b>  |
| 310 | China | Neijiang          | 645,874   | 1/22/2020 | 159.5 (97.7, 116.5, 167.2)  | 120.7 (98.0, 115.4, 140.4)  | -38.8  | <b>-4.3% (-1.4%, -7.1%)</b>  |
| 311 | China | Ningbo            | 4,116,209 | 1/22/2020 | 188.1 (112.9, 146.7, 216.2) | 161.1 (103.5, 137.8, 183.0) | -27.0  | <b>-8.8% (-4.4%, -12.9%)</b> |
| 312 | China | Ningde            | 334,023   | 1/22/2020 | 101.7 (75.8, 90.9, 109.4)   | 98.1 (74.2, 89.1, 108.7)    | -3.6   | <b>-4.3% (-1.5%, -7.0%)</b>  |

|     |       |                     |            |           |                             |                             |        |                               |
|-----|-------|---------------------|------------|-----------|-----------------------------|-----------------------------|--------|-------------------------------|
| 313 | China | Panjin              | 1,053,125  | 1/22/2020 | 151.8 (100.3, 123.2, 163.2) | 127.9 (97.4, 115.8, 145.9)  | -23.9  | <b>-5.6%</b> (-2.3%, -8.7%)   |
| 314 | China | Pingdingshan, Henan | 1,159,981  | 1/22/2020 | 205.0 (123.5, 150.2, 218.9) | 141.7 (102.6, 125.8, 165.6) | -63.3  | -1.9% (3.7%, -7.1%)           |
| 315 | China | Pingliang           | 380,401    | 1/22/2020 | 98.3 (76.5, 91.7, 111.7)    | 91.4 (75.0, 88.4, 103.1)    | -6.8   | 0.9% (4.3%, -2.4%)            |
| 316 | China | Pingxiang, Jiangxi  | 928,895    | 1/22/2020 | 157.9 (96.2, 115.2, 168.8)  | 111.6 (84.5, 96.9, 132.4)   | -46.3  | 1.6% (7.0%, -3.6%)            |
| 317 | China | Putian              | 1,907,350  | 1/22/2020 | 95.7 (73.1, 85.4, 104.7)    | 92.2 (75.4, 88.7, 101.4)    | -3.5   | <b>-4.4%</b> (-1.9%, -6.8%)   |
| 318 | China | Puyang              | 632,347    | 1/22/2020 | 221.3 (127.9, 171.0, 260.1) | 144.6 (110.7, 135.9, 163.5) | -76.8  | <b>-10.6%</b> (-7.9%, -13.3%) |
| 319 | China | Qingdao             | 5,619,977  | 1/22/2020 | 208.7 (125.5, 172.9, 252.5) | 147.0 (105.5, 134.2, 173.9) | -61.7  | <b>-7.1%</b> (-3.9%, -10.2%)  |
| 320 | China | Qingyuan            | 734,856    | 1/22/2020 | 146.8 (99.0, 117.2, 156.2)  | 126.5 (90.7, 107.7, 135.5)  | -20.3  | <b>-6.1%</b> (-2.8%, -9.4%)   |
| 321 | China | Qinhuangdao         | 1,535,223  | 1/22/2020 | 238.7 (122.8, 167.2, 260.1) | 165.6 (104.5, 131.1, 185.2) | -73.2  | <b>-8.9%</b> (-4.9%, -12.7%)  |
| 322 | China | Qiqihaer            | 1,559,581  | 1/22/2020 | 92.4 (72.1, 85.9, 100.4)    | 87.5 (72.2, 85.9, 97.7)     | -4.9   | <b>-6.2%</b> (-4.1%, -8.2%)   |
| 323 | China | Qitaihe             | 578,992    | 1/22/2020 | 102.7 (79.3, 93.8, 110.9)   | 98.8 (75.9, 88.8, 105.8)    | -3.9   | <b>-5.3%</b> (-2.5%, -8.0%)   |
| 324 | China | Quanzhou            | 1,694,076  | 1/22/2020 | 108.0 (84.9, 99.5, 119.3)   | 105.3 (86.7, 101.8, 120.4)  | -2.7   | <b>-5.0%</b> (-2.7%, -7.2%)   |
| 325 | China | Quzhou              | 757,655    | 1/22/2020 | 153.5 (94.9, 114.8, 150.5)  | 107.5 (84.6, 97.9, 121.4)   | -46.1  | -3.3% (0.8%, -7.2%)           |
| 326 | China | Sanmenxia           | 561,369    | 1/22/2020 | 163.5 (104.7, 132.4, 186.7) | 126.2 (94.8, 114.6, 142.3)  | -37.3  | <b>-5.8%</b> (-2.8%, -8.8%)   |
| 327 | China | Sanming             | 372,443    | 1/22/2020 | 93.0 (72.9, 83.6, 103.6)    | 88.9 (71.5, 84.1, 99.1)     | -4.1   | <b>-6.3%</b> (-4.4%, -8.3%)   |
| 328 | China | Sanya               | 625,290    | 1/22/2020 | 60.3 (53.3, 60.8, 66.5)     | 57.1 (50.2, 56.4, 61.8)     | -3.3   | -1.1% (0.4%, -2.5%)           |
| 329 | China | Shanghai            | 27,058,479 | 1/22/2020 | 283.0 (165.1, 228.7, 344.3) | 234.7 (138.8, 202.8, 299.5) | -48.3  | <b>-7.1%</b> (-2.6%, -11.4%)  |
| 330 | China | Shangqiu            | 826,598    | 1/22/2020 | 192.2 (119.4, 152.3, 214.9) | 129.0 (97.7, 118.0, 147.4)  | -63.2  | <b>-7.6%</b> (-4.5%, -10.7%)  |
| 331 | China | Shangrao            | 1,028,518  | 1/22/2020 | 133.8 (84.4, 99.6, 133.0)   | 95.4 (77.3, 88.4, 104.8)    | -38.3  | -2.3% (1.9%, -6.3%)           |
| 332 | China | Shantou             | 4,327,316  | 1/22/2020 | 108.2 (84.5, 98.2, 117.7)   | 102.0 (82.1, 99.3, 115.8)   | -6.1   | <b>-5.5%</b> (-3.3%, -7.7%)   |
| 333 | China | Shanwei             | 429,622    | 1/22/2020 | 84.0 (68.1, 77.5, 88.7)     | 77.2 (65.5, 73.0, 83.9)     | -6.7   | -2.0% (0.1%, -4.1%)           |
| 334 | China | Shaoguan            | 761,249    | 1/22/2020 | 106.2 (75.4, 89.6, 113.9)   | 98.1 (72.3, 87.7, 105.7)    | -8.1   | <b>-6.6%</b> (-3.9%, -9.1%)   |
| 335 | China | Shaoxing            | 2,540,018  | 1/22/2020 | 254.2 (131.3, 174.5, 267.5) | 150.1 (104.7, 137.4, 174.6) | -104.1 | 1.3% (7.5%, -4.5%)            |

|     |       |                  |            |           |                             |                             |        |                               |
|-----|-------|------------------|------------|-----------|-----------------------------|-----------------------------|--------|-------------------------------|
| 336 | China | Shaoyang         | 713,559    | 1/22/2020 | 139.6 (85.5, 103.2, 151.2)  | 100.8 (77.5, 90.6, 115.4)   | -38.9  | -4.3% (0.1%, -8.6%)           |
| 337 | China | Shenyang         | 7,220,104  | 1/22/2020 | 267.2 (158.5, 231.2, 320.0) | 207.0 (138.5, 185.3, 248.1) | -60.2  | <b>-7.3% (-2.5%, -11.9%)</b>  |
| 338 | China | Shenzhen         | 12,356,820 | 1/22/2020 | 211.7 (140.9, 182.4, 251.2) | 172.6 (111.1, 147.9, 199.7) | -39.0  | -2.2% (2.1%, -6.4%)           |
| 339 | China | Shihezi          | 329,750    | 1/22/2020 | 237.8 (107.4, 146.7, 280.2) | 149.7 (92.0, 118.4, 168.5)  | -88.2  | -3.0% (1.9%, -7.7%)           |
| 340 | China | Shijiazhuang     | 4,114,393  | 1/22/2020 | 383.3 (190.5, 288.6, 469.5) | 229.3 (158.9, 204.4, 273.7) | -154.0 | <b>-9.5% (-5.6%, -13.2%)</b>  |
| 341 | China | Shishi           | 585,317    | 1/22/2020 | 106.4 (84.9, 98.9, 117.6)   | 99.3 (80.4, 97.6, 106.8)    | -7.1   | <b>-5.8% (-4.0%, -7.6%)</b>   |
| 342 | China | Shiyan           | 1,241,450  | 1/22/2020 | 128.2 (89.3, 106.6, 137.5)  | 94.5 (76.7, 89.8, 107.6)    | -33.7  | <b>-3.2% (-0.1%, -6.3%)</b>   |
| 343 | China | Shizuishan       | 514,455    | 1/22/2020 | 162.6 (100.8, 133.7, 191.9) | 151.8 (105.0, 133.5, 174.9) | -10.8  | <b>-8.8% (-5.7%, -11.7%)</b>  |
| 344 | China | Shuangyashan     | 503,179    | 1/22/2020 | 95.8 (72.3, 88.0, 103.2)    | 85.8 (67.9, 80.4, 100.2)    | -10.0  | -2.9% (0.4%, -6.1%)           |
| 345 | China | Siping           | 594,482    | 1/22/2020 | 135.7 (90.3, 115.9, 159.5)  | 122.3 (82.3, 109.2, 144.3)  | -13.4  | <b>-8.0% (-4.2%, -11.7%)</b>  |
| 346 | China | Suining, Sichuan | 699,679    | 1/22/2020 | 145.4 (95.1, 113.8, 156.9)  | 106.2 (89.2, 105.2, 121.0)  | -39.2  | <b>-6.1% (-2.2%, -9.8%)</b>   |
| 347 | China | Suqian           | 1,440,060  | 1/22/2020 | 185.6 (112.8, 147.4, 218.8) | 133.9 (99.3, 123.5, 155.5)  | -51.8  | -1.3% (3.1%, -5.5%)           |
| 348 | China | Suzhou, Jiangsu  | 7,069,992  | 1/22/2020 | 291.4 (164.2, 244.0, 350.8) | 225.1 (132.1, 198.2, 287.9) | -66.4  | 3.3% (9.5%, -2.6%)            |
| 349 | China | Suzhou, Anhui    | 1,169,932  | 1/22/2020 | 175.9 (106.7, 141.1, 192.6) | 126.5 (91.8, 113.1, 145.1)  | -49.5  | <b>-7.6% (-4.2%, -10.9%)</b>  |
| 350 | China | Taian, Shandong  | 1,338,828  | 1/22/2020 | 249.4 (149.4, 189.6, 294.8) | 159.7 (116.5, 147.1, 195.8) | -89.6  | <b>-6.8% (-2.5%, -10.8%)</b>  |
| 351 | China | Taiyuan, Shanxi  | 3,891,127  | 1/22/2020 | 317.9 (187.8, 264.2, 401.6) | 213.6 (152.9, 193.7, 254.2) | -104.3 | <b>-12.0% (-7.8%, -16.0%)</b> |
| 352 | China | Taizhou, Jiangsu | 1,348,056  | 1/22/2020 | 193.8 (106.9, 153.7, 228.0) | 155.4 (105.8, 135.6, 193.1) | -38.4  | 2.7% (8.8%, -3.1%)            |



|     |       |                  |            |           |                             |                             |        |                               |
|-----|-------|------------------|------------|-----------|-----------------------------|-----------------------------|--------|-------------------------------|
| 353 | China | Tangshan, Hebei  | 3,425,638  | 1/22/2020 | 329.6 (183.7, 273.6, 408.7) | 272.3 (163.3, 234.6, 321.0) | -57.3  | <b>-9.7% (-6.2%, -13.0%)</b>  |
| 354 | China | Tianjin          | 13,589,078 | 1/22/2020 | 299.7 (174.6, 235.3, 364.5) | 217.4 (152.6, 193.6, 260.5) | -82.3  | <b>-7.9% (-3.9%, -11.7%)</b>  |
| 355 | China | Tianmen          | 869,837    | 1/22/2020 | 142.3 (90.6, 107.7, 153.3)  | 98.8 (79.5, 91.8, 112.6)    | -43.5  | <b>6.7% (11.7%, 2.0%)</b>     |
| 356 | China | Tianshui         | 765,372    | 1/22/2020 | 90.1 (73.7, 84.4, 100.5)    | 83.7 (68.1, 82.2, 93.2)     | -6.4   | -0.9% (1.7%, -3.4%)           |
| 357 | China | Tieling          | 412,264    | 1/22/2020 | 175.9 (107.8, 146.4, 212.6) | 153.3 (102.1, 128.1, 175.7) | -22.6  | <b>-6.6% (-1.7%, -11.2%)</b>  |
| 358 | China | Tongchuan        | 546,649    | 1/22/2020 | 181.6 (124.5, 151.9, 207.8) | 141.4 (102.1, 129.0, 159.4) | -40.2  | <b>-9.8% (-6.8%, -12.8%)</b>  |
| 359 | China | Tonghua          | 572,967    | 1/22/2020 | 114.6 (76.5, 93.5, 121.4)   | 96.0 (71.5, 84.5, 102.7)    | -18.6  | <b>-5.8% (-2.9%, -8.5%)</b>   |
| 360 | China | Tongliao         | 702,280    | 1/22/2020 | 105.7 (79.1, 94.9, 114.4)   | 96.3 (74.7, 91.6, 109.4)    | -9.4   | <b>-3.8% (-0.9%, -6.7%)</b>   |
| 361 | China | Tongling         | 696,639    | 1/22/2020 | 232.3 (123.1, 161.2, 235.5) | 159.5 (108.6, 135.3, 177.3) | -72.8  | -3.5% (1.3%, -8.0%)           |
| 362 | China | Ürümqi (Wulumqi) | 4,368,865  | 1/22/2020 | 473.2 (150.8, 217.5, 523.5) | 224.9 (125.7, 159.1, 223.9) | -248.3 | 0.0% (6.7%, -6.2%)            |
| 363 | China | Weifang          | 2,653,989  | 1/22/2020 | 234.9 (135.9, 180.9, 282.4) | 154.9 (113.5, 140.0, 182.5) | -80.1  | <b>-6.5% (-1.7%, -11.1%)</b>  |
| 364 | China | Weihai           | 1,304,315  | 1/22/2020 | 140.1 (92.4, 113.1, 146.7)  | 103.0 (84.8, 99.3, 117.8)   | -37.1  | <b>-7.0% (-3.9%, -10.0%)</b>  |
| 365 | China | Wenzhou          | 3,623,646  | 1/22/2020 | 143.3 (97.1, 123.9, 169.6)  | 118.4 (88.7, 111.5, 141.8)  | -24.9  | -2.2% (1.9%, -6.1%)           |
| 366 | China | Wuhai            | 630,295    | 1/22/2020 | 177.5 (91.9, 135.4, 214.7)  | 151.8 (90.9, 134.3, 176.0)  | -25.7  | <b>-13.6% (-8.0%, -18.9%)</b> |
| 367 | China | Wuhan            | 8,364,978  | 1/22/2020 | 278.6 (169.5, 234.9, 334.1) | 173.3 (114.0, 143.6, 207.1) | -105.3 | -2.5% (2.9%, -7.5%)           |
| 368 | China | Wuhu, Anhui      | 1,870,281  | 1/22/2020 | 209.5 (126.0, 159.9, 223.0) | 152.7 (108.1, 135.6, 183.8) | -56.8  | -1.7% (3.8%, -6.8%)           |
| 369 | China | Wulanhaote       | 335,437    | 1/22/2020 | 77.6 (62.4, 76.3, 87.6)     | 80.8 (63.4, 78.6, 92.8)     | 3.2    | -0.3% (2.2%, -2.7%)           |
| 370 | China | Wuxi, Jiangsu    | 3,256,020  | 1/22/2020 | 311.0 (173.7, 252.5, 375.2) | 235.0 (150.1, 198.0, 294.5) | -76.0  | 0.4% (6.5%, -5.3%)            |
| 371 | China | Wuzhou           | 696,630    | 1/22/2020 | 97.8 (73.5, 83.5, 99.1)     | 93.3 (72.4, 83.7, 102.5)    | -4.5   | <b>-3.7% (-0.6%, -6.6%)</b>   |
| 372 | China | Xiamen           | 3,720,141  | 1/22/2020 | 147.2 (106.8, 128.7, 165.5) | 119.2 (92.1, 114.2, 134.4)  | -27.9  | <b>-6.9% (-3.7%, -10.1%)</b>  |
| 373 | China | Xi'an, Shaanxi   | 8,000,965  | 1/22/2020 | 374.6 (184.0, 259.8, 406.7) | 223.4 (149.8, 189.2, 276.1) | -151.1 | <b>-10.8% (-6.7%, -14.7%)</b> |

|     |       |                   |           |           |                             |                             |        |                               |
|-----|-------|-------------------|-----------|-----------|-----------------------------|-----------------------------|--------|-------------------------------|
| 374 | China | Xiangtan, Hunan   | 1,142,976 | 1/22/2020 | 187.9 (109.6, 144.6, 228.7) | 129.5 (87.8, 112.3, 150.2)  | -58.4  | 1.8% (7.6%, -3.7%)            |
| 375 | China | Xianning          | 350,448   | 1/22/2020 | 166.7 (90.7, 106.8, 159.9)  | 103.4 (82.0, 92.2, 113.7)   | -63.4  | 5.0% (11.2%, -0.8%)           |
| 376 | China | Xiantao           | 588,540   | 1/22/2020 | 162.5 (92.5, 109.5, 171.5)  | 105.4 (79.6, 99.1, 123.6)   | -57.1  | 4.3% (10.0%, -1.0%)           |
| 377 | China | Xianyang, Shaanxi | 715,007   | 1/22/2020 | 267.9 (154.2, 206.8, 335.5) | 176.7 (125.0, 153.8, 203.2) | -91.2  | -4.0% (0.8%, -8.5%)           |
| 378 | China | Xiaogan           | 783,483   | 1/22/2020 | 179.5 (99.8, 121.5, 197.3)  | 112.3 (85.2, 106.8, 130.4)  | -67.2  | 3.7% (8.7%, -1.0%)            |
| 379 | China | Xinghua           | 791,297   | 1/22/2020 | 157.2 (94.7, 123.7, 174.0)  | 120.5 (89.8, 110.9, 140.0)  | -36.8  | 1.2% (6.5%, -3.9%)            |
| 380 | China | Xingtai           | 831,175   | 1/22/2020 | 370.0 (189.3, 285.0, 424.2) | 224.3 (158.2, 198.9, 262.7) | -145.7 | <b>-6.5% (-2.7%, -10.2%)</b>  |
| 381 | China | Xingyi, Guizhou   | 369,672   | 1/22/2020 | 76.3 (62.4, 72.1, 84.6)     | 74.7 (63.3, 74.1, 83.2)     | -1.6   | <b>-3.0% (-1.4%, -4.7%)</b>   |
| 382 | China | Xining            | 1,539,437 | 1/22/2020 | 154.7 (102.6, 135.3, 172.4) | 118.1 (93.1, 112.4, 136.6)  | -36.6  | <b>-7.3% (-4.5%, -10.1%)</b>  |
| 383 | China | Xintai            | 936,382   | 1/22/2020 | 225.5 (128.8, 167.4, 269.8) | 138.9 (109.1, 129.7, 158.7) | -86.6  | <b>-4.6% (-0.5%, -8.5%)</b>   |
| 384 | China | Xinxiang          | 1,081,031 | 1/22/2020 | 256.6 (148.5, 195.9, 291.9) | 177.1 (120.9, 151.0, 212.7) | -79.5  | <b>-7.7% (-4.0%, -11.2%)</b>  |
| 385 | China | Xinyang           | 797,369   | 1/22/2020 | 151.8 (92.2, 110.3, 156.9)  | 99.1 (78.2, 95.2, 108.7)    | -52.7  | 0.2% (5.3%, -4.7%)            |
| 386 | China | Xinyi             | 559,613   | 1/22/2020 | 186.9 (118.6, 152.1, 221.5) | 139.0 (101.7, 124.0, 162.5) | -47.9  | <b>-5.0% (-0.8%, -9.0%)</b>   |
| 387 | China | Xinyu             | 857,567   | 1/22/2020 | 159.4 (98.7, 126.3, 185.0)  | 115.6 (84.6, 108.7, 135.5)  | -43.8  | -0.8% (4.2%, -5.6%)           |
| 388 | China | Xinzhou           | 374,495   | 1/22/2020 | 223.2 (130.0, 168.3, 264.7) | 163.8 (112.2, 144.6, 197.2) | -59.4  | <b>-8.8% (-4.7%, -12.8%)</b>  |
| 389 | China | Xuchang           | 968,135   | 1/22/2020 | 197.8 (121.7, 157.3, 224.2) | 138.6 (101.7, 123.7, 156.9) | -59.2  | <b>-5.8% (-2.2%, -9.4%)</b>   |
| 390 | China | Xuzhou            | 2,145,970 | 1/22/2020 | 232.0 (140.9, 187.4, 263.5) | 156.3 (107.2, 148.2, 178.4) | -75.7  | -3.3% (1.5%, -7.9%)           |
| 391 | China | Yaan              | 360,612   | 1/22/2020 | 114.1 (80.5, 98.8, 126.5)   | 97.1 (80.1, 91.5, 106.6)    | -17.0  | <b>-8.0% (-6.0%, -10.0%)</b>  |
| 392 | China | Yan'an            | 678,619   | 1/22/2020 | 102.0 (78.7, 93.2, 113.1)   | 91.2 (74.6, 86.5, 100.8)    | -10.8  | <b>-7.8% (-5.3%, -10.2%)</b>  |
| 393 | China | Yancheng, Jiangsu | 1,864,424 | 1/22/2020 | 156.3 (97.2, 124.9, 175.0)  | 117.2 (84.5, 106.9, 140.2)  | -39.0  | <b>-10.9% (-5.1%, -16.4%)</b> |
| 394 | China | Yangjiang         | 890,013   | 1/22/2020 | 90.0 (68.4, 80.3, 99.7)     | 73.8 (63.0, 69.1, 81.8)     | -16.1  | 2.7% (7.8%, -2.2%)            |
| 395 | China | Yangquan          | 794,262   | 1/22/2020 | 266.4 (140.7, 207.0, 302.9) | 187.8 (126.3, 160.5, 224.0) | -78.6  | <b>-9.4% (-6.1%, -12.6%)</b>  |

|     |       |                      |           |           |                             |                             |       |                                |
|-----|-------|----------------------|-----------|-----------|-----------------------------|-----------------------------|-------|--------------------------------|
| 396 | China | Yangzhou             | 1,992,773 | 1/22/2020 | 234.9 (126.1, 188.1, 290.4) | 189.8 (114.0, 158.9, 227.8) | -45.1 | 0.3% (6.9%, -5.8%)             |
| 397 | China | Yanji                | 695,165   | 1/22/2020 | 87.6 (69.0, 81.2, 95.1)     | 81.5 (69.0, 78.2, 90.2)     | -6.0  | <b>-4.2% (-1.9%, -6.4%)</b>    |
| 398 | China | Yantai               | 2,526,702 | 1/22/2020 | 169.0 (105.6, 132.2, 191.2) | 120.0 (88.5, 107.7, 136.6)  | -49.0 | <b>-6.1% (-2.6%, -9.4%)</b>    |
| 399 | China | Yibin                | 814,166   | 1/22/2020 | 150.5 (101.0, 123.8, 169.2) | 125.8 (100.8, 123.3, 142.0) | -24.7 | <b>-5.9% (-3.2%, -8.5%)</b>    |
| 400 | China | Yichang              | 1,548,423 | 1/22/2020 | 132.8 (96.0, 116.2, 146.8)  | 104.4 (79.2, 98.9, 124.5)   | -28.4 | <b>-4.2% (-0.5%, -7.8%)</b>    |
| 401 | China | Yichun, Heilongjiang | 598,465   | 1/22/2020 | 78.4 (59.6, 71.7, 83.3)     | 69.8 (56.6, 69.7, 77.6)     | -8.6  | <b>-5.1% (-1.9%, -8.2%)</b>    |
| 402 | China | Yichun, Jiangxi      | 918,051   | 1/22/2020 | 136.2 (84.4, 102.1, 145.0)  | 100.5 (77.0, 93.6, 113.6)   | -35.8 | -1.2% (3.4%, -5.6%)            |
| 403 | China | Yinchuan             | 1,579,049 | 1/22/2020 | 164.4 (110.3, 138.2, 198.4) | 136.6 (108.8, 128.3, 164.1) | -27.8 | <b>-6.5% (-3.5%, -9.5%)</b>    |
| 404 | China | Yingkou              | 1,214,047 | 1/22/2020 | 168.6 (104.5, 126.1, 178.3) | 131.3 (94.9, 117.3, 148.4)  | -37.3 | <b>-4.3% (-0.6%, -7.8%)</b>    |
| 405 | China | Yining               | 356,001   | 1/22/2020 | 105.8 (79.0, 91.0, 106.5)   | 86.0 (73.3, 83.1, 92.3)     | -19.8 | <b>-7.2% (-4.7%, -9.6%)</b>    |
| 406 | China | Yiwu                 | 1,334,356 | 1/22/2020 | 188.4 (110.5, 136.6, 208.8) | 127.2 (95.9, 117.7, 143.0)  | -61.3 | -5.4% (0.9%, -11.4%)           |
| 407 | China | Yixing               | 432,414   | 1/22/2020 | 264.3 (132.9, 181.6, 300.6) | 182.1 (122.9, 158.2, 217.0) | -82.2 | <b>-6.7% (-2.1%, -11.0%)</b>   |
| 408 | China | Yiyang, Hunan        | 558,615   | 1/22/2020 | 100.1 (82.6, 92.3, 108.8)   | 102.8 (84.7, 98.6, 113.7)   | 2.7   | 0.9% (8.9%, -6.5%)             |
| 409 | China | Yongzhou             | 781,940   | 1/22/2020 | 117.2 (77.8, 90.6, 119.9)   | 92.3 (73.9, 83.5, 102.7)    | -24.9 | <b>-5.4% (-2.5%, -8.2%)</b>    |
| 410 | China | Yueyang              | 1,009,534 | 1/22/2020 | 160.5 (95.7, 116.9, 166.4)  | 109.3 (84.1, 100.9, 122.5)  | -51.2 | 2.5% (8.1%, -2.7%)             |
| 411 | China | Yulin, Guangxi       | 613,668   | 1/22/2020 | 109.2 (78.7, 91.4, 114.2)   | 92.2 (73.7, 85.0, 100.8)    | -17.0 | 1.0% (6.2%, -3.9%)             |
| 412 | China | Yulin, Shaanxi       | 695,614   | 1/22/2020 | 130.5 (92.5, 112.5, 152.1)  | 116.0 (83.7, 99.1, 124.5)   | -14.4 | <b>-12.8% (-10.0%, -15.5%)</b> |
| 413 | China | Yuncheng             | 675,082   | 1/22/2020 | 167.0 (101.8, 127.4, 185.2) | 117.8 (93.5, 109.0, 129.2)  | -49.3 | <b>-7.4% (-4.3%, -10.4%)</b>   |
| 414 | China | Yuxi                 | 662,863   | 1/22/2020 | 78.4 (64.2, 73.8, 88.7)     | 70.0 (57.9, 69.1, 79.8)     | -8.4  | <b>-2.1% (-0.2%, -3.9%)</b>    |
| 415 | China | Yuyao                | 678,841   | 1/22/2020 | 189.3 (111.7, 141.3, 210.9) | 132.6 (95.9, 123.1, 155.9)  | -56.8 | -2.9% (3.9%, -9.2%)            |
| 416 | China | Zaoyang              | 562,379   | 1/22/2020 | 148.1 (94.5, 113.9, 151.6)  | 100.1 (77.1, 93.4, 115.7)   | -48.0 | 0.9% (5.6%, -3.7%)             |

|     |       |                    |           |           |                             |                             |        |                              |
|-----|-------|--------------------|-----------|-----------|-----------------------------|-----------------------------|--------|------------------------------|
| 417 | China | Zaozhuang          | 1,087,745 | 1/22/2020 | 199.7 (124.9, 170.4, 242.5) | 143.4 (102.6, 137.0, 170.6) | -56.3  | <b>-4.0% (-0.2%, -7.8%)</b>  |
| 418 | China | Zhangjiakou        | 1,434,649 | 1/22/2020 | 141.2 (90.5, 119.0, 173.6)  | 116.5 (80.4, 101.6, 136.8)  | -24.7  | <b>-7.1% (-3.6%, -10.4%)</b> |
| 419 | China | Zhangjiagang       | 656,036   | 1/22/2020 | 280.1 (160.4, 227.9, 336.6) | 231.2 (146.3, 203.7, 279.6) | -48.9  | -1.1% (4.6%, -6.5%)          |
| 420 | China | Zhangshu           | 328,338   | 1/22/2020 | 152.8 (91.2, 107.8, 155.5)  | 104.2 (81.5, 95.7, 117.8)   | -48.6  | -0.2% (4.6%, -4.9%)          |
| 421 | China | Zhangye            | 442,604   | 1/22/2020 | 85.6 (75.9, 84.7, 94.5)     | 79.7 (66.1, 79.0, 90.8)     | -5.9   | <b>-2.6% (-1.0%, -4.1%)</b>  |
| 422 | China | Zhangzhou          | 871,690   | 1/22/2020 | 125.9 (89.1, 107.7, 139.5)  | 104.5 (80.9, 96.9, 118.5)   | -21.4  | <b>-7.6% (-4.9%, -10.2%)</b> |
| 423 | China | Zhanjiang          | 1,286,854 | 1/22/2020 | 83.9 (69.2, 80.6, 94.4)     | 82.1 (67.1, 79.5, 91.2)     | -1.8   | <b>-2.2% (-0.1%, -4.2%)</b>  |
| 424 | China | Zhaodong           | 550,240   | 1/22/2020 | 106.0 (80.4, 94.0, 114.4)   | 91.9 (74.4, 88.0, 103.3)    | -14.2  | <b>-8.7% (-5.1%, -12.1%)</b> |
| 425 | China | Zhaoqing           | 1,023,777 | 1/22/2020 | 137.8 (86.2, 106.5, 152.7)  | 100.7 (74.6, 84.0, 114.8)   | -37.2  | 0.8% (7.3%, -5.3%)           |
| 426 | China | Zhaotong           | 338,946   | 1/22/2020 | 85.9 (70.3, 82.7, 96.3)     | 82.1 (68.3, 80.7, 90.0)     | -3.8   | -0.9% (1.3%, -3.1%)          |
| 427 | China | Zhengzhou          | 5,322,696 | 1/22/2020 | 302.1 (182.6, 243.9, 343.9) | 198.9 (137.3, 178.8, 244.2) | -103.2 | <b>-9.4% (-5.7%, -12.9%)</b> |
| 428 | China | Zhenjiang, Jiangsu | 1,173,816 | 1/22/2020 | 247.4 (141.0, 188.3, 289.0) | 203.7 (128.2, 174.7, 247.8) | -43.6  | -2.4% (4.0%, -8.3%)          |
| 429 | China | Zhoukou            | 650,060   | 1/22/2020 | 170.5 (106.8, 138.8, 188.8) | 126.0 (91.8, 113.5, 148.9)  | -44.5  | <b>-5.8% (-2.2%, -9.2%)</b>  |
| 430 | China | Zhuhai             | 1,759,378 | 1/22/2020 | 177.6 (110.1, 141.2, 212.2) | 114.0 (83.8, 99.5, 129.5)   | -63.6  | 5.2% (12.1%, -1.3%)          |
| 431 | China | Zhumadian          | 716,002   | 1/22/2020 | 174.7 (108.1, 131.5, 179.5) | 122.1 (88.9, 115.7, 140.9)  | -52.6  | <b>-7.1% (-3.6%, -10.4%)</b> |
| 432 | China | Zhuozhou           | 355,461   | 1/22/2020 | 254.8 (139.4, 194.5, 311.7) | 169.1 (116.3, 149.9, 205.4) | -85.7  | <b>-8.1% (-4.5%, -11.5%)</b> |
| 433 | China | Zhuzhou            | 1,186,912 | 1/22/2020 | 166.1 (98.5, 119.7, 173.0)  | 111.8 (78.8, 100.1, 131.5)  | -54.3  | <b>-7.1% (-3.4%, -10.6%)</b> |
| 434 | China | Zibo               | 2,639,735 | 1/22/2020 | 293.5 (184.1, 235.1, 343.8) | 210.5 (144.9, 186.2, 248.8) | -83.0  | -4.1% (0.5%, -8.6%)          |
| 435 | China | Zigong             | 737,291   | 1/22/2020 | 164.9 (102.8, 121.6, 175.2) | 123.1 (99.8, 120.8, 138.8)  | -41.8  | <b>-8.6% (-5.6%, -11.4%)</b> |
| 436 | China | Zixing             | 330,483   | 1/22/2020 | 121.9 (74.1, 86.0, 112.1)   | 86.5 (68.7, 79.6, 94.2)     | -35.4  | -0.9% (3.8%, -5.4%)          |
| 437 | China | Zunyi              | 1,280,960 | 1/22/2020 | 112.7 (82.2, 97.5, 126.4)   | 98.8 (79.3, 93.1, 110.9)    | -13.9  | <b>-6.4% (-3.9%, -8.8%)</b>  |
| 438 | China | Ankang             | 636,293   | 1/22/2020 | 96.6 (77.5, 89.9, 103.6)    | 85.0 (71.2, 84.7, 96.3)     | -11.6  | <b>-6.0% (-3.4%, -8.5%)</b>  |

|     |       |            |           |           |                             |                             |        |                               |
|-----|-------|------------|-----------|-----------|-----------------------------|-----------------------------|--------|-------------------------------|
| 439 | China | Anlu       | 342,178   | 1/22/2020 | 149.8 (89.4, 109.4, 160.4)  | 100.8 (78.1, 91.4, 111.8)   | -49.0  | 3.9% (10.1%, -1.9%)           |
| 440 | China | Anning     | 317,091   | 1/22/2020 | 90.5 (71.8, 86.0, 104.1)    | 81.6 (61.3, 79.6, 94.7)     | -8.9   | 2.4% (5.2%, -0.4%)            |
| 441 | China | Anqiu      | 682,299   | 1/22/2020 | 210.8 (127.5, 166.6, 249.1) | 141.8 (104.9, 132.1, 165.8) | -69.1  | <b>-11.2% (-4.5%, -17.4%)</b> |
| 442 | China | Bazhong    | 991,820   | 1/22/2020 | 105.1 (77.4, 93.2, 118.1)   | 87.7 (72.2, 88.2, 99.1)     | -17.4  | -1.7% (1.3%, -4.6%)           |
| 443 | China | Bijie      | 637,795   | 1/22/2020 | 93.7 (73.5, 87.0, 104.3)    | 88.4 (71.5, 83.7, 100.9)    | -5.3   | <b>-2.7% (-0.1%, -5.3%)</b>   |
| 444 | China | Binzhou    | 1,083,867 | 1/22/2020 | 229.0 (136.3, 179.2, 276.4) | 165.3 (118.0, 140.9, 201.2) | -63.7  | <b>-5.6% (-1.3%, -9.7%)</b>   |
| 445 | China | Bozhou     | 742,150   | 1/22/2020 | 174.7 (103.3, 130.5, 192.1) | 120.4 (90.2, 112.5, 138.1)  | -54.3  | <b>-6.6% (-3.1%, -10.0%)</b>  |
| 446 | China | Cenxi      | 565,509   | 1/22/2020 | 91.3 (67.4, 77.4, 91.8)     | 82.3 (64.6, 74.2, 88.5)     | -9.1   | <b>-3.8% (-1.5%, -6.1%)</b>   |
| 447 | China | Changege   | 490,123   | 1/22/2020 | 209.5 (128.5, 161.1, 242.5) | 145.6 (101.1, 132.8, 175.6) | -63.8  | <b>-6.2% (-2.6%, -9.7%)</b>   |
| 448 | China | Changning  | 510,275   | 1/22/2020 | 124.8 (75.6, 86.8, 122.9)   | 95.3 (70.7, 83.2, 101.5)    | -29.5  | <b>-6.5% (-3.1%, -9.7%)</b>   |
| 449 | China | Changyi    | 482,027   | 1/22/2020 | 186.5 (108.9, 144.6, 222.9) | 125.4 (96.7, 112.8, 139.3)  | -61.1  | <b>-7.5% (-4.2%, -10.7%)</b>  |
| 450 | China | Chaohu     | 485,120   | 1/22/2020 | 217.6 (121.7, 154.8, 233.4) | 143.0 (104.7, 127.5, 163.9) | -74.6  | -0.9% (4.8%, -6.2%)           |
| 451 | China | Cixi       | 1,609,221 | 1/22/2020 | 187.4 (107.2, 136.6, 192.2) | 133.5 (96.5, 120.0, 160.0)  | -53.9  | -4.7% (2.0%, -10.9%)          |
| 452 | China | Daye       | 578,374   | 1/22/2020 | 199.1 (116.5, 148.6, 207.3) | 132.5 (97.2, 121.4, 152.0)  | -66.6  | 1.9% (8.4%, -4.1%)            |
| 453 | China | Dengfeng   | 540,789   | 1/22/2020 | 191.4 (110.4, 135.3, 205.5) | 138.3 (100.3, 125.5, 155.6) | -53.0  | <b>-5.0% (-1.0%, -8.8%)</b>   |
| 454 | China | Dengzhou   | 673,626   | 1/22/2020 | 155.3 (96.7, 114.7, 154.8)  | 106.7 (81.1, 99.8, 121.5)   | -48.5  | -0.9% (3.0%, -4.6%)           |
| 455 | China | Deyang     | 857,306   | 1/22/2020 | 185.3 (116.6, 153.6, 226.5) | 146.5 (111.0, 130.9, 159.2) | -38.8  | -2.1% (2.8%, -6.7%)           |
| 456 | China | Dingzhou   | 323,646   | 1/22/2020 | 272.2 (139.6, 191.2, 305.2) | 164.3 (119.2, 147.5, 199.4) | -107.9 | <b>-8.0% (-3.7%, -12.1%)</b>  |
| 457 | China | Donggang   | 370,168   | 1/22/2020 | 121.9 (84.7, 100.3, 135.8)  | 98.0 (77.6, 90.2, 103.4)    | -23.9  | <b>-6.3% (-4.0%, -8.5%)</b>   |
| 458 | China | Dongtai    | 676,996   | 1/22/2020 | 160.0 (94.0, 123.0, 180.3)  | 117.5 (87.5, 107.6, 134.8)  | -42.5  | 0.7% (5.8%, -4.2%)            |
| 459 | China | Dongyang   | 566,083   | 1/22/2020 | 173.7 (93.1, 116.9, 167.3)  | 111.9 (84.6, 101.8, 126.3)  | -61.8  | -0.3% (4.8%, -5.2%)           |
| 460 | China | Dongying   | 1,276,028 | 1/22/2020 | 218.1 (122.8, 169.7, 263.4) | 152.5 (104.7, 128.8, 175.6) | -65.7  | <b>-8.6% (-4.3%, -12.7%)</b>  |
| 461 | China | Dujiangyan | 382,169   | 1/22/2020 | 132.4 (85.4, 109.6, 145.4)  | 103.0 (84.1, 95.6, 114.2)   | -29.5  | -1.3% (2.4%, -4.9%)           |
| 462 | China | Enshi      | 586,667   | 1/22/2020 | 91.4 (74.9, 86.4, 102.0)    | 83.5 (68.7, 79.7, 94.8)     | -7.9   | <b>-2.7% (-0.2%, -5.2%)</b>   |
| 463 | China | Ezhou      | 668,405   | 1/22/2020 | 218.2 (128.7, 165.3, 243.9) | 152.4 (107.8, 141.6, 175.3) | -65.8  | 2.5% (7.6%, -2.4%)            |

|     |       |             |           |           |                             |                             |       |                              |
|-----|-------|-------------|-----------|-----------|-----------------------------|-----------------------------|-------|------------------------------|
| 464 | China | Feicheng    | 551,319   | 1/22/2020 | 219.9 (125.6, 169.4, 261.5) | 149.2 (109.8, 128.9, 167.5) | -70.7 | <b>-4.6% (0.0%, -9.0%)</b>   |
| 465 | China | Fengcheng   | 448,073   | 1/22/2020 | 151.2 (90.7, 109.3, 154.1)  | 106.1 (84.8, 98.6, 117.6)   | -45.1 | -4.1% (0.3%, -8.4%)          |
| 466 | China | Fuan        | 459,059   | 1/22/2020 | 88.4 (68.4, 78.0, 94.7)     | 83.7 (68.3, 78.4, 92.0)     | -4.7  | <b>-5.5% (-3.5%, -7.4%)</b>  |
| 467 | China | Fuqing      | 584,631   | 1/22/2020 | 96.7 (75.1, 87.1, 106.4)    | 94.7 (75.9, 89.3, 107.6)    | -2.1  | <b>-6.1% (-4.0%, -8.1%)</b>  |
| 468 | China | Gaoan       | 459,240   | 1/22/2020 | 151.9 (89.7, 112.2, 163.4)  | 114.7 (82.6, 100.8, 134.3)  | -37.2 | -1.5% (3.8%, -6.5%)          |
| 469 | China | Gaomi       | 716,261   | 1/22/2020 | 191.3 (118.9, 150.8, 226.5) | 133.5 (101.4, 122.9, 151.2) | -57.8 | <b>-7.4% (-4.2%, -10.5%)</b> |
| 470 | China | Gaoping     | 372,920   | 1/22/2020 | 192.0 (116.1, 152.2, 208.2) | 148.2 (106.8, 129.9, 170.9) | -43.8 | <b>-5.0% (-0.9%, -9.1%)</b>  |
| 471 | China | Gaoyou      | 507,934   | 1/22/2020 | 185.1 (104.1, 136.1, 210.2) | 130.8 (92.7, 117.4, 143.5)  | -54.3 | 2.8% (8.7%, -2.8%)           |
| 472 | China | Gongyi      | 511,410   | 1/22/2020 | 257.7 (133.4, 185.3, 301.9) | 171.0 (116.5, 145.1, 197.6) | -86.7 | -0.7% (5.2%, -6.3%)          |
| 473 | China | Gongzhuling | 373,210   | 1/22/2020 | 120.7 (86.1, 104.5, 145.7)  | 111.9 (75.8, 101.7, 136.6)  | -8.8  | <b>-8.8% (-5.3%, -12.2%)</b> |
| 474 | China | Guang'an    | 484,324   | 1/22/2020 | 169.3 (94.3, 115.0, 188.7)  | 109.2 (88.9, 102.4, 123.4)  | -60.2 | <b>-6.1% (-2.4%, -9.6%)</b>  |
| 475 | China | Guangyuan   | 539,179   | 1/22/2020 | 91.6 (73.7, 86.8, 103.9)    | 88.6 (73.2, 86.4, 101.0)    | -3.0  | -0.1% (2.9%, -2.9%)          |
| 476 | China | Guigang     | 891,173   | 1/22/2020 | 101.7 (77.3, 90.1, 107.9)   | 92.5 (74.5, 85.1, 105.2)    | -9.3  | -1.7% (1.7%, -5.0%)          |
| 477 | China | Guiping     | 891,158   | 1/22/2020 | 98.2 (73.5, 83.9, 101.4)    | 91.3 (71.5, 83.0, 102.1)    | -7.0  | -0.5% (4.3%, -5.1%)          |
| 478 | China | Haerbin     | 6,387,195 | 1/22/2020 | 170.2 (109.3, 139.7, 193.3) | 130.9 (92.3, 118.1, 155.8)  | -39.3 | <b>-8.5% (-5.2%, -11.7%)</b> |
| 479 | China | Haicheng    | 783,484   | 1/22/2020 | 207.8 (128.7, 170.7, 247.2) | 174.3 (117.3, 151.6, 215.5) | -33.5 | -2.5% (1.2%, -6.2%)          |
| 480 | China | Haikou      | 1,889,071 | 1/22/2020 | 73.3 (60.3, 71.0, 83.1)     | 74.0 (59.8, 69.2, 83.6)     | 0.7   | 0.0% (2.1%, -2.2%)           |
| 481 | China | Hailin      | 323,336   | 1/22/2020 | 94.3 (66.1, 79.0, 94.3)     | 81.5 (66.0, 80.1, 94.4)     | -12.7 | -3.1% (0.1%, -6.2%)          |
| 482 | China | Haimen      | 626,067   | 1/22/2020 | 185.6 (104.9, 138.0, 221.8) | 163.2 (101.0, 132.9, 201.5) | -22.4 | <b>-5.2% (-0.2%, -10.0%)</b> |
| 483 | China | Haining     | 527,655   | 1/22/2020 | 211.5 (119.5, 157.1, 250.5) | 156.8 (110.0, 137.0, 171.9) | -54.7 | 3.6% (9.5%, -1.9%)           |
| 484 | China | Haiyang     | 328,140   | 1/22/2020 | 135.4 (89.7, 108.2, 152.9)  | 103.7 (78.3, 95.1, 115.8)   | -31.7 | <b>-4.2% (-1.3%, -6.9%)</b>  |
| 485 | China | Hanchuan    | 715,218   | 1/22/2020 | 197.0 (107.8, 135.6, 222.4) | 123.6 (86.6, 107.7, 131.5)  | -73.3 | <b>5.8% (11.8%, 0.2%)</b>    |
| 486 | China | Hejian      | 440,022   | 1/22/2020 | 233.3 (128.7, 171.0, 266.7) | 156.2 (118.0, 138.8, 179.9) | -77.1 | <b>-7.6% (-3.2%, -11.7%)</b> |
| 487 | China | Hezhou      | 625,304   | 1/22/2020 | 95.3 (72.9, 84.2, 98.3)     | 86.4 (66.9, 79.3, 93.0)     | -8.9  | 1.3% (4.4%, -1.8%)           |
| 488 | China | Huazhou     | 355,837   | 1/22/2020 | 82.3 (66.5, 76.0, 90.0)     | 80.4 (66.8, 73.8, 85.8)     | -1.9  | 0.9% (3.6%, -1.7%)           |
| 489 | China | Huixian     | 358,553   | 1/22/2020 | 268.2 (149.8, 199.0, 309.4) | 182.4 (122.6, 157.8, 212.2) | -85.8 | -3.2% (1.7%, -7.9%)          |

|     |       |                 |           |           |                             |                             |       |                               |
|-----|-------|-----------------|-----------|-----------|-----------------------------|-----------------------------|-------|-------------------------------|
| 490 | China | Jiangyin        | 843,292   | 1/22/2020 | 298.0 (158.8, 242.5, 364.6) | 241.5 (143.1, 220.8, 315.9) | -56.5 | 0.7% (7.4%, -5.5%)            |
| 491 | China | Jianyang        | 487,133   | 1/22/2020 | 160.9 (102.0, 129.0, 173.3) | 124.0 (103.8, 117.8, 145.4) | -37.0 | <b>-6.7% (-4.0%, -9.3%)</b>   |
| 492 | China | Jiaozhou        | 551,500   | 1/22/2020 | 203.1 (126.8, 166.8, 226.6) | 151.2 (106.0, 139.6, 174.1) | -51.9 | <b>-5.0% (-1.0%, -8.9%)</b>   |
| 493 | China | Jieyang         | 1,146,758 | 1/22/2020 | 122.8 (91.2, 107.8, 130.4)  | 105.1 (82.8, 95.7, 116.5)   | -17.7 | -1.2% (2.3%, -4.6%)           |
| 494 | China | Jincheng        | 733,879   | 1/22/2020 | 223.2 (128.9, 162.5, 244.3) | 150.3 (110.8, 132.5, 172.0) | -72.9 | <b>-6.0% (-2.5%, -9.4%)</b>   |
| 495 | China | Jingjiang       | 577,513   | 1/22/2020 | 257.6 (138.1, 206.5, 324.5) | 226.6 (127.6, 197.9, 288.6) | -31.0 | -1.0% (5.8%, -7.4%)           |
| 496 | China | Jingzhou, Hubei | 1,038,296 | 1/22/2020 | 164.0 (107.3, 130.8, 183.1) | 117.1 (86.2, 113.8, 136.1)  | -46.9 | 0.7% (5.7%, -4.0%)            |
| 497 | China | Jinjiang        | 498,294   | 1/22/2020 | 118.8 (92.5, 109.1, 131.2)  | 112.5 (90.7, 107.5, 129.3)  | -6.3  | <b>-6.8% (-4.4%, -9.1%)</b>   |
| 498 | China | Jinzhong        | 599,611   | 1/22/2020 | 257.9 (147.6, 205.1, 300.8) | 179.3 (127.3, 161.6, 207.8) | -78.6 | <b>-11.1% (-7.8%, -14.3%)</b> |
| 499 | China | Nankang         | 417,052   | 1/22/2020 | 97.3 (75.1, 85.0, 104.1)    | 85.7 (68.5, 77.2, 89.9)     | -11.7 | <b>-3.1% (0.0%, -6.2%)</b>    |
| 500 | China | Ningguo         | 340,375   | 1/22/2020 | 149.1 (82.0, 98.5, 137.5)   | 101.5 (75.6, 89.7, 118.9)   | -47.6 | 3.5% (9.4%, -2.2%)            |
| 501 | China | Panzhuhua       | 707,134   | 1/22/2020 | 109.3 (78.3, 100.2, 132.5)  | 92.9 (71.4, 85.3, 105.9)    | -16.4 | 0.5% (3.9%, -2.7%)            |
| 502 | China | Pingdu          | 525,093   | 1/22/2020 | 173.1 (106.9, 137.7, 192.9) | 126.1 (93.6, 115.5, 147.5)  | -47.0 | -3.3% (0.9%, -7.3%)           |
| 503 | China | Pinghu          | 440,963   | 1/22/2020 | 217.3 (122.1, 158.4, 264.3) | 168.9 (113.3, 148.5, 187.5) | -48.4 | <b>5.6% (11.5%, 0.0%)</b>     |
| 504 | China | Pizhou          | 1,063,231 | 1/22/2020 | 178.8 (112.3, 139.6, 210.4) | 132.3 (97.2, 118.9, 145.8)  | -46.5 | <b>-5.9% (-2.7%, -9.0%)</b>   |
| 505 | China | Puning          | 1,160,045 | 1/22/2020 | 103.3 (80.3, 93.6, 110.2)   | 87.7 (70.2, 82.8, 101.3)    | -15.6 | 1.0% (4.1%, -2.1%)            |
| 506 | China | Qinzhou         | 644,359   | 1/22/2020 | 85.0 (69.2, 78.0, 91.9)     | 83.3 (66.9, 77.9, 93.3)     | -1.7  | -2.1% (0.7%, -4.9%)           |
| 507 | China | Qufu            | 365,574   | 1/22/2020 | 217.9 (133.6, 178.7, 258.5) | 144.0 (111.2, 133.8, 172.8) | -74.0 | <b>-5.1% (-0.9%, -9.1%)</b>   |
| 508 | China | Qujing          | 942,342   | 1/22/2020 | 90.0 (71.9, 85.7, 102.2)    | 84.2 (68.1, 83.5, 97.8)     | -5.8  | -2.1% (0.3%, -4.3%)           |
| 509 | China | Renqiu          | 640,271   | 1/22/2020 | 253.9 (136.0, 184.2, 291.2) | 165.6 (119.5, 140.5, 189.2) | -88.3 | <b>-7.8% (-3.3%, -12.1%)</b>  |
| 510 | China | Rizhao          | 1,270,948 | 1/22/2020 | 221.1 (124.6, 188.3, 284.5) | 164.7 (95.6, 140.3, 199.8)  | -56.4 | -4.2% (0.8%, -8.9%)           |
| 511 | China | Rongcheng       | 407,671   | 1/22/2020 | 123.4 (85.0, 98.7, 129.8)   | 93.1 (75.2, 89.9, 103.2)    | -30.3 | <b>-6.4% (-3.2%, -9.5%)</b>   |
| 512 | China | Rugao           | 317,217   | 1/22/2020 | 172.2 (95.7, 129.5, 202.1)  | 142.6 (94.0, 115.6, 176.9)  | -29.5 | -0.4% (5.5%, -5.9%)           |
| 513 | China | Ruian           | 1,168,983 | 1/22/2020 | 123.7 (88.3, 109.3, 138.1)  | 105.9 (83.9, 101.1, 119.1)  | -17.8 | <b>-7.7% (-4.0%, -11.2%)</b>  |
| 514 | China | Rushan          | 321,112   | 1/22/2020 | 129.2 (85.3, 103.4, 141.3)  | 96.3 (75.6, 89.2, 108.6)    | -32.9 | <b>-4.6% (-1.4%, -7.6%)</b>   |
| 515 | China | Sanhe           | 576,241   | 1/22/2020 | 230.7 (116.4, 165.3, 273.8) | 182.7 (109.7, 138.1, 214.0) | -48.1 | <b>-6.2% (-1.5%, -10.7%)</b>  |
| 516 | China | Shangyu         | 510,813   | 1/22/2020 | 183.2 (109.5, 140.4, 186.5) | 144.4 (103.9, 127.7, 170.4) | -38.8 | 2.6% (10.6%, -4.9%)           |

|     |       |            |           |           |                             |                             |       |                               |
|-----|-------|------------|-----------|-----------|-----------------------------|-----------------------------|-------|-------------------------------|
| 517 | China | Shengzhou  | 401,022   | 1/22/2020 | 163.7 (93.5, 117.3, 179.0)  | 114.1 (90.3, 104.8, 128.7)  | -49.6 | -0.3% (4.7%, -5.0%)           |
| 518 | China | Shouguang  | 544,207   | 1/22/2020 | 240.0 (149.9, 197.9, 292.4) | 166.6 (118.8, 147.4, 188.6) | -73.4 | <b>-13.5% (-8.1%, -18.5%)</b> |
| 519 | China | Shuozhou   | 563,456   | 1/22/2020 | 162.8 (103.8, 132.0, 191.6) | 129.4 (93.7, 116.2, 142.0)  | -33.4 | <b>-10.1% (-7.0%, -13.2%)</b> |
| 520 | China | Sihui      | 591,080   | 1/22/2020 | 150.6 (95.2, 111.6, 162.2)  | 118.0 (82.0, 98.9, 137.6)   | -32.6 | -2.0% (3.1%, -6.8%)           |
| 521 | China | Liling     | 812,975   | 1/22/2020 | 152.6 (86.1, 106.4, 155.0)  | 103.6 (76.8, 91.7, 116.4)   | -48.9 | <b>-6.3% (-2.2%, -10.1%)</b>  |
| 522 | China | Linhai     | 708,981   | 1/22/2020 | 128.2 (83.0, 97.8, 132.9)   | 101.0 (77.7, 98.3, 118.2)   | -27.2 | -3.0% (0.2%, -6.2%)           |
| 523 | China | Linzhou    | 408,275   | 1/22/2020 | 237.4 (133.0, 183.0, 273.0) | 179.9 (121.3, 151.1, 204.8) | -57.5 | -1.9% (3.1%, -6.7%)           |
| 524 | China | Liuyang    | 1,169,044 | 1/22/2020 | 129.5 (79.9, 92.8, 130.3)   | 97.9 (75.7, 89.4, 113.2)    | -31.6 | 2.2% (7.0%, -2.3%)            |
| 525 | China | Liyang     | 454,339   | 1/22/2020 | 221.5 (116.2, 157.4, 253.4) | 167.3 (108.8, 150.0, 203.5) | -54.2 | 5.6% (12.0%, -0.5%)           |
| 526 | China | Longhai    | 631,203   | 1/22/2020 | 137.7 (97.3, 116.0, 157.4)  | 116.4 (88.5, 106.0, 138.1)  | -21.3 | <b>-6.9% (-4.0%, -9.6%)</b>   |
| 527 | China | Longkou    | 520,568   | 1/22/2020 | 156.6 (105.3, 125.3, 172.8) | 120.8 (92.5, 114.0, 141.6)  | -35.7 | <b>-5.5% (-2.3%, -8.5%)</b>   |
| 528 | China | Luoding    | 364,909   | 1/22/2020 | 94.2 (69.5, 80.1, 98.1)     | 81.5 (63.5, 73.5, 92.4)     | -12.7 | 0.4% (4.0%, -3.1%)            |
| 529 | China | Macheng    | 352,419   | 1/22/2020 | 137.8 (90.0, 102.8, 144.3)  | 102.0 (79.8, 97.1, 116.7)   | -35.8 | -0.8% (3.8%, -5.1%)           |
| 530 | China | Meishan    | 723,267   | 1/22/2020 | 174.4 (107.1, 137.4, 200.0) | 133.4 (104.5, 127.7, 153.4) | -41.0 | <b>-7.5% (-3.9%, -11.0%)</b>  |
| 531 | China | Miluo      | 604,159   | 1/22/2020 | 157.3 (86.6, 103.1, 152.5)  | 103.8 (79.7, 94.2, 118.6)   | -53.6 | -1.3% (3.9%, -6.2%)           |
| 532 | China | Ziyang     | 500,094   | 1/22/2020 | 156.0 (94.3, 114.8, 156.7)  | 115.4 (93.9, 111.9, 131.5)  | -40.6 | -3.4% (0.5%, -7.2%)           |
| 533 | China | Zhuji      | 777,536   | 1/22/2020 | 190.8 (100.6, 134.4, 197.0) | 117.8 (89.3, 109.2, 130.0)  | -73.0 | -1.0% (4.2%, -6.0%)           |
| 534 | China | Zhucheng   | 891,494   | 1/22/2020 | 184.2 (117.1, 152.1, 221.6) | 132.3 (99.2, 122.0, 152.2)  | -51.9 | <b>-5.0% (-1.1%, -8.7%)</b>   |
| 535 | China | Zhuanghe   | 465,761   | 1/22/2020 | 127.2 (86.5, 101.9, 135.0)  | 99.0 (76.5, 88.3, 112.1)    | -28.2 | <b>-5.0% (-1.9%, -8.0%)</b>   |
| 536 | China | Zhoushan   | 647,419   | 1/22/2020 | 111.8 (79.4, 97.8, 126.4)   | 109.9 (78.7, 101.9, 126.6)  | -2.0  | <b>-5.3% (-2.1%, -8.4%)</b>   |
| 537 | China | Zhongxiang | 491,713   | 1/22/2020 | 134.3 (86.8, 105.5, 142.5)  | 93.6 (71.2, 90.0, 110.2)    | -40.7 | 2.4% (7.0%, -2.1%)            |
| 538 | China | Zhongshan  | 2,913,974 | 1/22/2020 | 187.7 (107.6, 141.5, 205.7) | 115.5 (80.9, 101.2, 140.2)  | -72.3 | 4.3% (11.3%, -2.3%)           |
| 539 | China | Yushu      | 356,496   | 1/22/2020 | 118.1 (83.0, 100.3, 129.4)  | 104.6 (76.6, 95.6, 121.7)   | -13.5 | <b>-7.1% (-4.1%, -10.0%)</b>  |



|     |       |                   |           |           |                             |                             |       |                              |
|-----|-------|-------------------|-----------|-----------|-----------------------------|-----------------------------|-------|------------------------------|
| 540 | China | Yunfu             | 359,668   | 1/22/2020 | 114.2 (78.1, 93.3, 121.6)   | 86.5 (65.8, 77.3, 93.0)     | -27.7 | 0.1% (4.2%, -3.9%)           |
| 541 | China | Yuanjiang         | 344,057   | 1/22/2020 | 96.3 (82.8, 91.4, 103.2)    | 104.1 (85.0, 95.0, 111.8)   | 7.8   | -5.0% (2.4%, -11.9%)         |
| 542 | China | Yongkang          | 526,069   | 1/22/2020 | 151.4 (90.2, 112.8, 158.4)  | 108.7 (85.0, 105.5, 124.7)  | -42.8 | 1.1% (5.7%, -3.2%)           |
| 543 | China | Yongcheng         | 473,513   | 1/22/2020 | 176.9 (108.8, 139.3, 194.7) | 119.7 (93.0, 114.6, 137.3)  | -57.3 | <b>-6.9% (-3.5%, -10.1%)</b> |
| 544 | China | Xuanwei           | 336,549   | 1/22/2020 | 78.9 (64.5, 74.3, 85.6)     | 74.7 (64.0, 73.8, 82.5)     | -4.2  | -0.3% (2.0%, -2.5%)          |
| 545 | China | Xinzheng          | 443,992   | 1/22/2020 | 218.6 (129.6, 167.8, 252.3) | 151.3 (104.0, 137.0, 180.4) | -67.3 | -4.5% (0.4%, -9.1%)          |
| 546 | China | Xinyi             | 401,139   | 1/22/2020 | 84.6 (65.1, 75.5, 87.4)     | 80.4 (64.1, 73.3, 85.7)     | -4.1  | <b>5.6% (10.5%, 0.9%)</b>    |
| 547 | China | Xingping          | 389,645   | 1/22/2020 | 246.3 (122.3, 165.0, 314.2) | 151.6 (101.7, 126.6, 173.4) | -94.7 | -0.5% (5.3%, -6.1%)          |
| 548 | China | Xingning          | 487,815   | 1/22/2020 | 87.7 (69.6, 79.3, 92.6)     | 82.2 (67.4, 75.1, 88.9)     | -5.5  | <b>-3.3% (-0.6%, -6.0%)</b>  |
| 549 | China | Wuwei             | 399,718   | 1/22/2020 | 87.2 (74.3, 83.8, 95.1)     | 83.3 (68.4, 82.1, 96.1)     | -3.9  | <b>-3.9% (-1.3%, -6.4%)</b>  |
| 550 | China | Wuchuan           | 348,873   | 1/22/2020 | 77.4 (62.8, 73.4, 86.2)     | 71.6 (59.9, 67.5, 77.3)     | -5.8  | 0.5% (3.2%, -2.1%)           |
| 551 | China | Wenling           | 1,037,164 | 1/22/2020 | 105.5 (77.8, 94.0, 117.5)   | 92.2 (73.3, 90.6, 108.2)    | -13.4 | <b>-8.8% (-6.1%, -11.4%)</b> |
| 552 | China | Wenchang          | 356,073   | 1/22/2020 | 61.5 (52.1, 60.0, 68.2)     | 60.4 (52.0, 57.6, 65.7)     | -1.1  | 0.4% (2.5%, -1.6%)           |
| 553 | China | Weinan            | 553,302   | 1/22/2020 | 198.7 (117.6, 148.4, 228.8) | 127.7 (95.9, 118.7, 145.1)  | -71.0 | -2.8% (1.2%, -6.7%)          |
| 554 | China | Wafangdian        | 459,825   | 1/22/2020 | 145.1 (93.1, 114.0, 157.5)  | 115.2 (85.0, 105.4, 129.9)  | -29.9 | <b>-7.1% (-4.3%, -9.8%)</b>  |
| 555 | China | Tongxiang         | 629,527   | 1/22/2020 | 222.4 (124.5, 166.3, 256.1) | 167.1 (121.6, 152.6, 198.9) | -55.3 | <b>5.8% (11.7%, 0.3%)</b>    |
| 556 | China | Tongcheng         | 418,418   | 1/22/2020 | 157.9 (88.1, 107.3, 143.9)  | 108.9 (84.6, 100.2, 122.1)  | -49.0 | -3.8% (0.4%, -7.7%)          |
| 557 | China | Taizhou, Zhejiang | 1,934,847 | 1/22/2020 | 126.8 (92.3, 110.7, 143.6)  | 117.1 (90.8, 110.7, 137.2)  | -9.7  | -3.5% (0.1%, -6.9%)          |
| 558 | China | Taixing           | 747,588   | 1/22/2020 | 230.4 (118.8, 173.5, 274.2) | 185.3 (116.1, 160.7, 241.9) | -45.1 | -1.2% (5.4%, -7.4%)          |
| 559 | China | Taishan           | 524,937   | 1/22/2020 | 130.1 (75.3, 94.1, 145.7)   | 81.9 (64.1, 72.7, 92.0)     | -48.2 | 4.2% (10.7%, -1.9%)          |
| 560 | China | Taicang           | 654,441   | 1/22/2020 | 253.3 (149.8, 206.0, 327.4) | 220.5 (133.5, 194.2, 275.1) | -32.8 | <b>-6.2% (-2.0%, -10.3%)</b> |
| 561 | China | Suizhou           | 445,438   | 1/22/2020 | 142.6 (87.9, 109.7, 152.8)  | 100.3 (76.9, 89.6, 106.0)   | -42.3 | 1.8% (6.6%, -2.7%)           |

|     |       |           |         |           |                             |                             |       |                               |
|-----|-------|-----------|---------|-----------|-----------------------------|-----------------------------|-------|-------------------------------|
| 562 | China | Suihua    | 421,817 | 1/22/2020 | 107.7 (74.1, 90.2, 113.6)   | 87.2 (66.9, 84.9, 99.2)     | -20.6 | <b>-8.8% (-5.7%, -11.7%)</b>  |
| 563 | China | Songzi    | 332,001 | 1/22/2020 | 132.9 (84.4, 99.7, 141.6)   | 100.3 (75.7, 90.7, 112.8)   | -32.5 | -3.7% (0.1%, -7.3%)           |
| 564 | China | Songyuan  | 513,231 | 1/22/2020 | 75.4 (60.4, 68.1, 79.8)     | 71.5 (60.2, 66.9, 76.9)     | -3.9  | <b>-2.0% (0.0%, -4.0%)</b>    |
| 565 | China | Qianjiang | 511,738 | 1/22/2020 | 145.4 (91.5, 106.3, 144.4)  | 101.2 (78.1, 101.1, 120.7)  | -44.2 | <b>5.3% (10.6%, 0.3%)</b>     |
| 566 | China | Qidong    | 362,526 | 1/22/2020 | 140.8 (85.5, 110.4, 151.0)  | 137.2 (88.8, 114.0, 159.1)  | -3.5  | 0.2% (5.7%, -5.1%)            |
| 567 | China | Qingzhou  | 520,371 | 1/22/2020 | 240.2 (149.4, 192.3, 277.4) | 167.1 (117.4, 147.2, 192.9) | -73.1 | <b>-10.6% (-4.9%, -15.9%)</b> |
| 568 | China | Jiyuan    | 415,541 | 1/22/2020 | 263.6 (141.8, 189.6, 283.2) | 178.8 (129.4, 152.6, 192.4) | -84.8 | <b>-7.7% (-4.1%, -11.1%)</b>  |
| 569 | China | Jurong    | 434,797 | 1/22/2020 | 230.5 (121.7, 159.5, 259.2) | 154.0 (108.1, 132.9, 174.6) | -76.6 | 0.3% (6.4%, -5.4%)            |
| 570 | China | Kaiping   | 399,946 | 1/22/2020 | 145.9 (83.3, 104.3, 164.4)  | 95.9 (69.3, 82.9, 105.4)    | -50.0 | 3.0% (9.6%, -3.2%)            |
| 571 | China | Kunshan   | 737,654 | 1/22/2020 | 278.0 (153.7, 228.2, 336.7) | 226.7 (142.0, 194.6, 276.3) | -51.3 | 0.9% (7.2%, -5.0%)            |
| 572 | China | Laiwu     | 907,839 | 1/22/2020 | 251.5 (158.5, 211.0, 283.8) | 161.7 (122.4, 150.1, 188.0) | -89.8 | <b>-6.4% (-3.2%, -9.5%)</b>   |
| 573 | China | Laixi     | 505,117 | 1/22/2020 | 157.0 (103.7, 128.3, 175.4) | 120.4 (91.0, 111.5, 137.3)  | -36.6 | <b>-4.5% (-1.5%, -7.3%)</b>   |
| 574 | China | Laiyang   | 387,064 | 1/22/2020 | 156.4 (102.7, 125.7, 172.0) | 116.6 (90.1, 105.7, 135.1)  | -39.8 | <b>-4.2% (-0.5%, -7.7%)</b>   |
| 575 | China | Laizhou   | 394,174 | 1/22/2020 | 154.6 (100.1, 125.4, 172.8) | 112.8 (85.7, 104.7, 130.1)  | -41.8 | <b>-6.0% (-2.5%, -9.3%)</b>   |
| 576 | China | Leiyang   | 851,071 | 1/22/2020 | 134.8 (80.0, 94.5, 133.3)   | 99.1 (71.8, 87.3, 114.3)    | -35.7 | <b>-7.5% (-4.4%, -10.4%)</b>  |
| 577 | China | Leping    | 348,096 | 1/22/2020 | 134.8 (81.8, 93.1, 117.9)   | 91.4 (74.7, 86.0, 99.6)     | -43.4 | <b>-7.7% (-4.5%, -10.7%)</b>  |
| 578 | China | Liaocheng | 760,885 | 1/22/2020 | 226.0 (137.1, 177.5, 273.7) | 154.0 (116.7, 137.3, 174.9) | -72.0 | <b>-11.6% (-6.3%, -16.7%)</b> |
| 579 | China | Gaozhou   | 537,329 | 1/22/2020 | 85.7 (69.5, 77.4, 89.8)     | 81.6 (68.5, 76.2, 87.6)     | -4.1  | 2.3% (6.5%, -1.8%)            |
| 580 | China | Danyang   | 718,649 | 1/22/2020 | 237.4 (129.3, 172.6, 276.2) | 177.9 (119.0, 156.8, 208.8) | -59.6 | -2.7% (3.3%, -8.3%)           |
| 581 | China | Changshu  | 938,683 | 1/22/2020 | 268.6 (156.8, 223.4, 354.1) | 216.9 (144.5, 199.7, 261.1) | -51.7 | -1.6% (4.0%, -6.9%)           |
| 582 | China | Baishan   | 821,967 | 1/22/2020 | 103.6 (76.8, 88.6, 108.7)   | 90.6 (74.1, 82.4, 95.3)     | -13.0 | <b>-5.0% (-2.7%, -7.2%)</b>   |
| 583 | China | Chizhou   | 458,420 | 1/22/2020 | 192.6 (109.1, 132.8, 177.4) | 123.9 (96.3, 107.8, 136.7)  | -68.8 | -2.6% (1.7%, -6.7%)           |
| 584 | China | Danzhou   | 388,987 | 1/22/2020 | 62.0 (53.5, 60.5, 67.8)     | 63.3 (51.5, 60.0, 70.5)     | 1.3   | -1.4% (0.2%, -3.0%)           |
| 585 | China | Dashiqiao | 368,955 | 1/22/2020 | 196.1 (125.1, 160.5, 230.9) | 172.0 (111.2, 149.0, 208.5) | -24.1 | <b>-4.0% (-0.8%, -7.1%)</b>   |
| 586 | China | Enping    | 385,670 | 1/22/2020 | 106.6 (72.7, 87.5, 119.1)   | 80.2 (64.0, 71.9, 87.4)     | -26.3 | 0.2% (4.4%, -3.9%)            |

|     |       |                 |           |           |                             |                             |        |                               |
|-----|-------|-----------------|-----------|-----------|-----------------------------|-----------------------------|--------|-------------------------------|
| 587 | China | Fangchenggang   | 420,065   | 1/22/2020 | 85.5 (68.4, 77.9, 93.9)     | 79.4 (64.4, 73.1, 87.5)     | -6.2   | <b>-3.6% (-0.8%, -6.3%)</b>   |
| 588 | China | Heshan          | 391,932   | 1/22/2020 | 207.5 (110.8, 154.5, 251.1) | 128.2 (86.3, 103.6, 142.1)  | -79.3  | 0.3% (7.2%, -6.2%)            |
| 589 | China | Yueqing         | 1,060,702 | 1/22/2020 | 109.4 (80.6, 96.0, 125.1)   | 103.6 (77.9, 96.4, 115.9)   | -5.8   | <b>-9.6% (-6.4%, -12.7%)</b>  |
| 590 | China | Tengzhou        | 1,189,963 | 1/22/2020 | 216.2 (132.4, 168.7, 244.0) | 145.4 (114.6, 137.5, 165.8) | -70.8  | <b>-7.8% (-4.7%, -10.7%)</b>  |
| 591 | China | Xingyang        | 396,961   | 1/22/2020 | 281.2 (151.5, 196.7, 306.9) | 178.1 (125.0, 159.7, 219.6) | -103.1 | -0.3% (5.6%, -5.9%)           |
| 592 | China | Xinmi           | 575,696   | 1/22/2020 | 215.6 (124.5, 163.8, 257.7) | 159.6 (102.3, 142.0, 185.3) | -56.0  | -1.0% (4.4%, -6.2%)           |
| 593 | China | Xuancheng       | 466,755   | 1/22/2020 | 164.5 (95.0, 116.6, 165.7)  | 119.2 (87.5, 102.6, 134.9)  | -45.3  | <b>-4.4% (-1.5%, -7.1%)</b>   |
| 594 | China | Yangchun        | 305,114   | 1/22/2020 | 86.6 (68.4, 76.1, 91.9)     | 77.3 (64.0, 70.5, 82.5)     | -9.4   | <b>4.5% (9.2%, 0.0%)</b>      |
| 595 | China | Yanshi          | 507,643   | 1/22/2020 | 258.6 (131.2, 182.0, 283.0) | 167.1 (117.8, 146.6, 200.7) | -91.5  | 0.5% (6.3%, -5.0%)            |
| 596 | China | Yingde          | 430,821   | 1/22/2020 | 155.8 (101.9, 130.2, 167.6) | 117.6 (85.5, 100.4, 131.4)  | -38.2  | -4.2% (0.3%, -8.4%)           |
| 597 | China | Zhaoyuan        | 347,664   | 1/22/2020 | 142.7 (97.9, 116.5, 148.8)  | 114.1 (83.3, 103.8, 131.1)  | -28.6  | <b>-3.8% (-0.7%, -6.9%)</b>   |
| 598 | China | Wanning         | 362,912   | 1/22/2020 | 57.9 (49.4, 58.5, 63.9)     | 57.8 (50.5, 56.9, 62.0)     | -0.1   | -0.3% (1.5%, -2.1%)           |
| 599 | China | Erduosi (Ordos) | 706,657   | 1/22/2020 | 109.0 (78.0, 93.6, 120.0)   | 90.6 (74.0, 85.1, 100.9)    | -18.4  | <b>-8.2% (-5.3%, -10.9%)</b>  |
| 600 | China | Laibin          | 404,239   | 1/22/2020 | 103.8 (75.3, 87.2, 114.2)   | 92.1 (70.8, 83.8, 102.5)    | -11.7  | -2.2% (1.0%, -5.3%)           |
| 601 | China | Lvliang         | 441,843   | 1/22/2020 | 205.3 (125.5, 172.1, 240.1) | 149.7 (101.7, 138.6, 181.1) | -55.6  | <b>-9.8% (-6.7%, -12.8%)</b>  |
| 602 | China | Dazhou          | 682,342   | 1/22/2020 | 140.4 (98.8, 121.0, 172.2)  | 129.7 (93.1, 122.8, 154.6)  | -10.7  | <b>-6.7% (-3.8%, -9.5%)</b>   |
| 603 | China | Bayannaouer     | 443,110   | 1/22/2020 | 103.8 (75.8, 89.5, 113.9)   | 92.1 (71.3, 91.4, 107.8)    | -11.7  | <b>-7.8% (-5.0%, -10.6%)</b>  |
| 604 | China | Xiangyang       | 1,657,726 | 1/22/2020 | 169.2 (105.4, 128.4, 177.7) | 104.3 (81.5, 100.5, 118.1)  | -65.0  | 1.6% (6.4%, -3.1%)            |
| 605 | China | Xiongan         | 969,535   | 1/22/2020 | 251.3 (131.1, 178.7, 287.3) | 163.1 (115.8, 141.3, 196.3) | -88.1  | <b>-9.2% (-4.5%, -13.6%)</b>  |
| 606 | China | Yuhuan          | 459,707   | 1/22/2020 | 105.4 (81.4, 94.0, 116.3)   | 98.3 (77.5, 92.0, 109.1)    | -7.1   | <b>-8.1% (-5.3%, -10.7%)</b>  |
| 607 | China | Shenmu          | 349,271   | 1/22/2020 | 163.2 (98.1, 126.8, 200.4)  | 137.3 (93.1, 119.4, 164.4)  | -26.0  | <b>-12.0% (-9.1%, -14.9%)</b> |
| 608 | China | Longchang       | 403,680   | 1/22/2020 | 157.9 (94.9, 117.1, 172.7)  | 119.6 (89.8, 111.6, 140.1)  | -38.2  | <b>-6.6% (-3.5%, -9.7%)</b>   |

|     |                                 |              |           |           |                             |                             |       |                               |
|-----|---------------------------------|--------------|-----------|-----------|-----------------------------|-----------------------------|-------|-------------------------------|
| 609 | China, Hong Kong SAR            | Hong Kong    | 7,547,652 | 1/1/2020  | 178.0 (115.7, 153.7, 206.3) | 156.0 (102.9, 132.9, 176.8) | -22.0 | 2.2% (10.5%, -5.6%)           |
| 610 | China, Macao SAR                | Macao        | 651,875   | 1/6/2020  | 165.0 (104.0, 133.3, 198.1) | 118.0 (81.8, 98.3, 139.7)   | -47.0 | -1.0% (12.5%, -12.8%)         |
| 611 | China, Taiwan Province of China | Taibei       | 2,721,485 | 1/1/2020  | 105.4 (70.5, 87.8, 123.4)   | 111.5 (78.3, 99.6, 124.8)   | 6.1   | <b>-12.1% (-1.4%, -21.7%)</b> |
| 612 | China, Taiwan Province of China | Gaoxiong     | 1,537,640 | 1/1/2020  | 147.8 (105.0, 132.0, 174.5) | 132.0 (91.8, 114.8, 156.8)  | -15.8 | -1.4% (11.9%, -13.2%)         |
| 613 | China, Taiwan Province of China | Jilong       | 368,947   | 1/1/2020  | 89.1 (63.3, 78.8, 105.0)    | 91.7 (68.9, 85.7, 103.0)    | 2.5   | <b>-10.8% (-2.0%, -18.9%)</b> |
| 614 | China, Taiwan Province of China | Tainan       | 849,996   | 1/1/2020  | 104.2 (84.6, 98.0, 116.8)   | 99.3 (80.5, 92.6, 109.9)    | -4.9  | -4.6% (2.9%, -11.5%)          |
| 615 | China, Taiwan Province of China | Taizhong     | 1,320,591 | 1/1/2020  | 134.9 (100.1, 121.7, 155.0) | 130.7 (98.0, 118.3, 145.9)  | -4.2  | -7.2% (3.9%, -17.1%)          |
| 616 | China, Taiwan Province of China | Taoyuan      | 2,245,162 | 1/1/2020  | 111.7 (84.6, 106.0, 131.2)  | 119.7 (90.7, 104.9, 127.9)  | 8.1   | 8.7% (20.0%, -1.6%)           |
| 617 | China, Taiwan Province of China | Xinbei       | 4,398,383 | 1/1/2020  | 116.9 (78.9, 103.1, 139.4)  | 128.5 (89.4, 114.0, 144.1)  | 11.6  | -7.4% (4.6%, -18.0%)          |
| 618 | China, Taiwan Province of China | Xinzhu       | 450,520   | 1/1/2020  | 103.9 (84.4, 97.0, 114.5)   | 102.2 (78.2, 90.5, 105.0)   | -1.7  | -7.5% (0.7%, -15.0%)          |
| 619 | Colombia                        | Armenia      | 410,130   | 2/24/2020 | 47.0 (41.8, 47.1, 52.1)     | 46.2 (41.8, 46.4, 50.3)     | -0.8  | <b>-2.7% (-0.9%, -4.5%)</b>   |
| 620 | Colombia                        | Barranquilla | 2,272,914 | 2/24/2020 | 59.7 (50.3, 58.1, 68.0)     | 60.1 (51.8, 57.6, 66.3)     | 0.4   | <b>-2.4% (-0.2%, -4.5%)</b>   |

|     |            |               |            |           |                         |                         |      |                              |
|-----|------------|---------------|------------|-----------|-------------------------|-------------------------|------|------------------------------|
| 621 | Colombia   | Bucaramanga   | 1,331,453  | 2/24/2020 | 44.7 (40.5, 45.2, 48.9) | 44.5 (40.8, 44.4, 48.0) | -0.3 | <b>0.8% (1.7%, 0.0%)</b>     |
| 622 | Colombia   | Buenaventura  | 451,498    | 2/24/2020 | 39.9 (36.1, 39.7, 43.5) | 40.9 (36.4, 40.4, 45.1) | 1.0  | 1.3% (2.8%, -0.2%)           |
| 623 | Colombia   | Cali          | 2,781,980  | 2/24/2020 | 64.8 (53.3, 62.6, 74.0) | 58.7 (49.2, 58.0, 66.3) | -6.1 | <b>-4.7% (-2.4%, -7.1%)</b>  |
| 624 | Colombia   | Cartagena     | 1,062,622  | 2/24/2020 | 63.4 (54.6, 63.0, 71.5) | 62.0 (55.2, 61.9, 68.2) | -1.5 | -2.1% (0.1%, -4.2%)          |
| 625 | Colombia   | C?uta         | 933,380    | 2/24/2020 | 46.9 (41.0, 46.4, 51.7) | 47.8 (43.1, 47.1, 51.9) | 0.9  | -0.8% (0.7%, -2.3%)          |
| 626 | Colombia   | Ibagu?e       | 586,187    | 2/24/2020 | 41.5 (36.8, 41.1, 45.5) | 41.1 (37.1, 41.2, 45.0) | -0.4 | <b>-3.4% (-1.7%, -5.0%)</b>  |
| 627 | Colombia   | Manizales     | 448,035    | 2/24/2020 | 45.1 (41.0, 45.2, 49.5) | 43.9 (39.1, 43.9, 48.3) | -1.2 | -1.7% (0.5%, -3.9%)          |
| 628 | Colombia   | Medell?       | 4,000,263  | 2/24/2020 | 68.0 (52.2, 61.8, 78.1) | 60.4 (46.0, 59.4, 70.0) | -7.6 | <b>-6.7% (-3.6%, -9.7%)</b>  |
| 629 | Colombia   | Monteria      | 426,477    | 2/24/2020 | 48.5 (42.9, 47.6, 53.5) | 49.5 (44.0, 48.8, 54.1) | 1.1  | 1.4% (4.6%, -1.6%)           |
| 630 | Colombia   | Neiva         | 357,215    | 2/24/2020 | 38.3 (34.6, 38.2, 42.1) | 39.0 (35.2, 39.0, 42.1) | 0.7  | -0.2% (1.4%, -1.8%)          |
| 631 | Colombia   | Pasto         | 388,483    | 2/24/2020 | 33.4 (30.6, 33.1, 36.1) | 34.4 (31.2, 34.5, 37.3) | 1.0  | <b>-1.8% (-0.2%, -3.4%)</b>  |
| 632 | Colombia   | Pereira       | 579,620    | 2/24/2020 | 45.5 (40.3, 45.5, 50.2) | 43.5 (39.5, 43.1, 47.5) | -2.1 | -1.1% (0.5%, -2.6%)          |
| 633 | Colombia   | Bogot?a       | 10,978,360 | 2/24/2020 | 58.1 (39.2, 47.4, 62.6) | 53.6 (39.6, 45.3, 53.8) | -4.5 | <b>-6.8% (-3.4%, -10.0%)</b> |
| 634 | Colombia   | Santa Marta   | 527,326    | 2/24/2020 | 52.0 (44.8, 52.3, 58.0) | 53.2 (47.7, 51.5, 57.7) | 1.2  | -1.6% (0.1%, -3.2%)          |
| 635 | Colombia   | Valledupar    | 533,453    | 2/24/2020 | 50.4 (44.1, 50.1, 56.5) | 53.8 (50.1, 53.4, 57.2) | 3.4  | 1.1% (2.4%, -0.3%)           |
| 636 | Colombia   | Villavicencio | 544,115    | 2/24/2020 | 38.2 (33.6, 37.4, 41.6) | 39.0 (34.7, 37.5, 43.2) | 0.8  | <b>-3.2% (-1.0%, -5.4%)</b>  |
| 637 | Congo      | Brazzaville   | 2,388,090  | 3/3/2020  | 68.5 (55.3, 66.4, 79.8) | 78.9 (61.4, 76.5, 92.1) | 10.4 | <b>-3.0% (-1.2%, -4.7%)</b>  |
| 638 | Congo      | Pointe-Noire  | 1,214,281  | 3/3/2020  | 52.6 (44.5, 51.4, 59.2) | 56.5 (46.9, 53.9, 66.1) | 3.9  | -1.5% (0.1%, -3.0%)          |
| 639 | Costa Rica | San Jos?e     | 1,399,629  | 3/10/2020 | 50.5 (41.2, 49.7, 57.4) | 49.8 (42.9, 48.5, 54.2) | -0.7 | -1.3% (1.1%, -3.7%)          |
| 640 | Costa Rica | Alajuela      | 365,584    | 3/10/2020 | 54.5 (43.8, 53.1, 62.5) | 53.0 (46.2, 52.1, 58.5) | -1.5 | -1.5% (1.2%, -4.1%)          |
| 641 | Costa Rica | Heredia       | 340,594    | 3/10/2020 | 51.5 (42.9, 49.9, 58.9) | 50.6 (43.9, 49.6, 57.8) | -1.0 | -1.6% (1.0%, -4.1%)          |

|     |                                  |                    |            |           |                            |                           |       |                          |
|-----|----------------------------------|--------------------|------------|-----------|----------------------------|---------------------------|-------|--------------------------|
| 642 | Cote d'Ivoire                    | Abidjan            | 5,202,762  | 3/16/2020 | 64.6 (49.2, 62.0, 76.0)    | 63.8 (51.8, 60.3, 73.3)   | -0.8  | 1.4% (4.4%, -1.5%)       |
| 643 | Cote d'Ivoire                    | Bouake             | 571,876    | 3/16/2020 | 47.1 (41.3, 45.9, 52.5)    | 44.8 (41.7, 45.0, 48.3)   | -2.3  | <b>1.6% (3.3%, 0.0%)</b> |
| 644 | Croatia                          | Zagreb             | 684,878    | 2/4/2020  | 94.2 (77.1, 88.1, 102.3)   | 84.5 (72.2, 81.7, 91.5)   | -9.7  | -0.8% (1.1%, -2.7%)      |
| 645 | Cuba                             | Camaguey           | 309,741    | 2/21/2020 | 54.1 (45.1, 54.1, 62.9)    | 58.6 (52.2, 56.9, 64.2)   | 4.5   | -1.0% (1.0%, -2.9%)      |
| 646 | Cuba                             | La Habana (Havana) | 2,140,423  | 2/21/2020 | 66.8 (57.3, 66.9, 75.2)    | 68.2 (62.0, 67.3, 73.9)   | 1.4   | -0.9% (1.6%, -3.4%)      |
| 647 | Cuba                             | Santiago de Cuba   | 437,884    | 2/21/2020 | 52.8 (45.3, 52.6, 60.3)    | 53.7 (50.0, 53.8, 58.0)   | 1.0   | 0.2% (2.7%, -2.2%)       |
| 648 | Czechia                          | Brno               | 378,485    | 1/27/2020 | 103.9 (81.9, 96.3, 115.2)  | 90.9 (76.6, 86.4, 99.8)   | -13.0 | 0.9% (4.3%, -2.4%)       |
| 649 | Czechia                          | Praha (Prague)     | 1,305,737  | 1/27/2020 | 119.7 (93.8, 114.1, 133.1) | 102.7 (85.9, 96.4, 111.8) | -17.0 | 0.4% (2.6%, -1.9%)       |
| 650 | Democratic Republic of the Congo | Bukavu             | 1,078,002  | 2/20/2020 | 40.6 (35.2, 39.3, 45.5)    | 42.2 (35.7, 41.3, 47.8)   | 1.6   | -1.1% (1.4%, -3.5%)      |
| 651 | Democratic Republic of the Congo | Kananga            | 1,458,400  | 2/20/2020 | 52.3 (39.9, 47.4, 63.0)    | 61.1 (44.1, 60.3, 76.6)   | 8.8   | 1.2% (3.9%, -1.5%)       |
| 652 | Democratic Republic of the Congo | Kikwit             | 507,462    | 2/20/2020 | 55.6 (40.0, 47.3, 66.0)    | 64.6 (42.5, 62.1, 83.9)   | 9.1   | -0.2% (2.5%, -2.9%)      |
| 653 | Democratic Republic of the Congo | Kinshasa           | 14,342,439 | 2/20/2020 | 72.7 (57.8, 71.1, 86.7)    | 80.6 (64.3, 79.1, 94.0)   | 7.9   | 0.4% (3.2%, -2.3%)       |
| 654 | Democratic Republic of the Congo | Kisangani          | 1,261,310  | 2/20/2020 | 43.3 (37.5, 42.9, 48.3)    | 44.1 (37.7, 44.2, 49.5)   | 0.9   | -1.7% (0.6%, -3.9%)      |

|     |                                        |            |           |           |                         |                         |      |                     |
|-----|----------------------------------------|------------|-----------|-----------|-------------------------|-------------------------|------|---------------------|
| 655 | Democratic<br>Republic of the<br>Congo | Likasi     | 567,839   | 2/20/2020 | 53.3 (39.6, 46.8, 65.7) | 53.9 (37.9, 46.1, 68.7) | 0.5  | 1.5% (3.7%, -0.6%)  |
| 656 | Democratic<br>Republic of the<br>Congo | Lubumbashi | 2,478,262 | 2/20/2020 | 57.6 (42.2, 50.9, 72.7) | 56.6 (42.4, 52.1, 69.2) | -1.0 | 2.0% (4.3%, -0.2%)  |
| 657 | Democratic<br>Republic of the<br>Congo | Matadi     | 389,669   | 2/20/2020 | 51.2 (41.5, 47.9, 56.4) | 58.5 (43.7, 53.7, 69.3) | 7.3  | 0.5% (2.6%, -1.7%)  |
| 658 | Democratic<br>Republic of the<br>Congo | Mbandaka   | 442,989   | 2/20/2020 | 45.1 (39.5, 44.5, 49.8) | 45.2 (38.5, 44.6, 53.0) | 0.1  | 2.2% (5.1%, -0.5%)  |
| 659 | Democratic<br>Republic of the<br>Congo | Mbuji-Mayi | 2,525,263 | 2/20/2020 | 51.5 (39.2, 47.8, 60.6) | 59.9 (44.8, 58.2, 76.8) | 8.5  | 2.4% (5.0%, -0.2%)  |
| 660 | Democratic<br>Republic of the<br>Congo | Kolwezi    | 494,654   | 2/20/2020 | 54.2 (38.6, 46.4, 68.3) | 57.7 (38.0, 53.8, 77.2) | 3.5  | 0.7% (3.4%, -1.9%)  |
| 661 | Democratic<br>Republic of the<br>Congo | Tshikapa   | 919,192   | 2/20/2020 | 54.9 (40.9, 47.6, 63.7) | 66.2 (41.9, 64.4, 88.8) | 11.3 | -1.6% (0.9%, -4.1%) |
| 662 | Democratic<br>Republic of the<br>Congo | Goma       | 634,197   | 2/20/2020 | 38.4 (33.3, 38.5, 43.9) | 40.5 (34.1, 39.6, 45.4) | 2.1  | -1.6% (1.1%, -4.3%) |
| 663 | Democratic<br>Republic of the<br>Congo | Uvira      | 589,731   | 2/20/2020 | 42.1 (35.2, 41.1, 48.4) | 44.1 (37.0, 43.8, 50.2) | 2.0  | -0.6% (1.4%, -2.5%) |
| 664 | Democratic<br>Republic of the<br>Congo | Bunia      | 679,418   | 2/20/2020 | 39.4 (32.7, 38.4, 45.2) | 40.0 (36.4, 40.5, 44.5) | 0.7  | -1.7% (1.8%, -5.2%) |

|     |                                  |                              |           |           |                           |                            |       |                             |
|-----|----------------------------------|------------------------------|-----------|-----------|---------------------------|----------------------------|-------|-----------------------------|
| 665 | Democratic Republic of the Congo | Kabinda                      | 465,599   | 2/20/2020 | 50.2 (36.8, 43.9, 58.1)   | 59.6 (40.2, 60.7, 77.4)    | 9.4   | -0.3% (2.7%, -3.3%)         |
| 666 | Denmark                          | K?enhavn (Copenhagen)        | 1,346,485 | 3/3/2020  | 95.4 (72.2, 90.0, 107.7)  | 85.8 (74.3, 84.8, 94.5)    | -9.6  | 2.1% (8.4%, -3.8%)          |
| 667 | Djibouti                         | Djibouti                     | 576,157   | 3/18/2020 | 47.9 (41.5, 46.8, 54.2)   | 52.0 (46.3, 51.3, 56.3)    | 4.0   | -0.5% (0.3%, -1.3%)         |
| 668 | Dominican Republic               | Santiago                     | 664,575   | 3/16/2020 | 65.0 (55.5, 65.4, 73.6)   | 63.5 (57.3, 62.8, 68.9)    | -1.5  | <b>-1.5% (0.0%, -3.1%)</b>  |
| 669 | Dominican Republic               | Santo Domingo                | 3,317,784 | 3/16/2020 | 82.7 (65.1, 77.4, 93.5)   | 65.8 (57.2, 65.6, 73.9)    | -17.0 | <b>-2.7% (-0.4%, -5.0%)</b> |
| 670 | Ecuador                          | Cuenca                       | 418,372   | 3/2/2020  | 36.5 (31.5, 36.0, 40.5)   | 37.3 (32.8, 37.1, 41.1)    | 0.8   | <b>-1.3% (0.0%, -2.6%)</b>  |
| 671 | Ecuador                          | Guayaquil                    | 2,994,218 | 3/2/2020  | 83.2 (57.9, 74.9, 98.3)   | 70.6 (52.7, 66.5, 86.1)    | -12.7 | <b>-6.5% (-3.6%, -9.3%)</b> |
| 672 | Ecuador                          | Quito                        | 1,873,763 | 3/2/2020  | 51.8 (42.5, 49.6, 59.1)   | 45.3 (37.1, 43.4, 52.5)    | -6.5  | <b>-6.2% (-4.4%, -7.9%)</b> |
| 673 | Ecuador                          | Santo Domingo                | 355,471   | 3/2/2020  | 48.8 (42.9, 47.6, 53.6)   | 49.1 (41.4, 48.2, 54.9)    | 0.3   | <b>-2.4% (-1.1%, -3.6%)</b> |
| 674 | Egypt                            | Al-Iskandariyah (Alexandria) | 5,280,664 | 3/15/2020 | 95.8 (68.9, 81.6, 104.2)  | 86.8 (73.0, 78.7, 87.0)    | -9.0  | -1.0% (0.7%, -2.7%)         |
| 675 | Egypt                            | Al-Mahallah al-Kubra         | 517,549   | 3/15/2020 | 102.1 (82.5, 97.2, 112.9) | 103.1 (90.3, 102.4, 114.2) | 1.1   | <b>-3.1% (-0.9%, -5.1%)</b> |
| 676 | Egypt                            | Asyut                        | 460,998   | 3/15/2020 | 85.1 (70.2, 83.5, 95.9)   | 88.4 (78.0, 85.2, 96.1)    | 3.3   | -0.5% (1.3%, -2.2%)         |
| 677 | Egypt                            | Aswan                        | 344,989   | 3/15/2020 | 68.0 (57.5, 65.1, 74.7)   | 71.7 (64.2, 69.5, 74.6)    | 3.7   | 0.9% (2.8%, -0.9%)          |



|     |             |                    |            |           |                             |                             |       |                             |
|-----|-------------|--------------------|------------|-----------|-----------------------------|-----------------------------|-------|-----------------------------|
| 678 | Egypt       | Al-Qahirah (Cairo) | 20,900,604 | 3/15/2020 | 225.5 (150.8, 190.8, 258.7) | 218.2 (165.2, 190.4, 245.4) | -7.3  | -1.6% (1.2%, -4.4%)         |
| 679 | Egypt       | Al-Fayyum          | 409,558    | 3/15/2020 | 102.4 (76.9, 92.3, 113.7)   | 100.7 (85.0, 95.6, 112.1)   | -1.7  | -2.8% (0.5%, -6.0%)         |
| 680 | Egypt       | Al-Ismailiyah      | 353,957    | 3/15/2020 | 128.8 (97.6, 112.5, 142.8)  | 111.6 (95.9, 106.8, 121.9)  | -17.3 | -0.2% (3.2%, -3.5%)         |
| 681 | Egypt       | Kafr-ad-Dawwar     | 343,622    | 3/15/2020 | 97.5 (80.0, 94.3, 109.7)    | 101.2 (86.4, 98.8, 113.2)   | 3.7   | -1.8% (0.4%, -3.8%)         |
| 682 | Egypt       | Al-Mansurah        | 555,621    | 3/15/2020 | 124.9 (97.0, 114.8, 141.3)  | 116.7 (101.0, 111.7, 129.5) | -8.2  | -1.6% (1.0%, -4.2%)         |
| 683 | Egypt       | Bur Sa'id          | 737,000    | 3/15/2020 | 98.0 (84.0, 92.9, 105.9)    | 92.2 (84.6, 90.3, 96.7)     | -5.8  | <b>-1.9% (-0.1%, -3.5%)</b> |
| 684 | Egypt       | As-Suways          | 638,229    | 3/15/2020 | 108.5 (83.4, 96.8, 117.5)   | 106.0 (85.6, 94.7, 110.9)   | -2.5  | -1.0% (1.5%, -3.5%)         |
| 685 | Egypt       | Tanta              | 501,423    | 3/15/2020 | 107.7 (89.3, 103.8, 119.5)  | 110.8 (98.2, 109.7, 123.6)  | 3.1   | -0.8% (1.6%, -3.1%)         |
| 686 | Egypt       | Az-Zaqazig         | 358,378    | 3/15/2020 | 113.3 (93.4, 105.4, 120.7)  | 111.9 (98.5, 111.2, 121.7)  | -1.4  | -1.1% (1.8%, -3.9%)         |
| 687 | El Salvador | San Salvador       | 1,105,766  | 1/31/2020 | 68.6 (57.1, 66.6, 77.4)     | 64.0 (56.5, 63.8, 69.6)     | -4.6  | 0.1% (2.7%, -2.3%)          |
| 688 | Eritrea     | Asmara             | 962,985    | 3/11/2020 | 47.1 (40.9, 45.8, 53.5)     | 50.1 (45.5, 49.3, 53.5)     | 3.0   | -0.4% (0.9%, -1.7%)         |
| 689 | Estonia     | Tallinn            | 445,259    | 3/12/2020 | 80.8 (61.3, 79.8, 95.6)     | 83.3 (71.3, 81.7, 90.7)     | 2.6   | -1.4% (2.1%, -4.8%)         |
| 690 | Ethiopia    | Addis Ababa        | 4,793,699  | 1/28/2020 | 56.0 (44.3, 53.2, 65.3)     | 55.7 (47.3, 54.3, 62.6)     | -0.3  | 1.8% (5.3%, -1.5%)          |
| 691 | Ethiopia    | Dire Dawa          | 408,096    | 1/28/2020 | 45.3 (39.3, 45.1, 50.6)     | 45.7 (41.7, 45.1, 50.4)     | 0.4   | -1.6% (0.7%, -3.9%)         |
| 692 | Ethiopia    | Gondar             | 362,314    | 1/28/2020 | 44.7 (38.1, 43.4, 51.1)     | 47.1 (41.9, 46.6, 51.5)     | 2.4   | -1.2% (1.1%, -3.4%)         |
| 693 | Ethiopia    | Mekele             | 523,915    | 1/28/2020 | 49.8 (42.6, 48.9, 55.2)     | 50.6 (44.9, 50.6, 55.4)     | 0.8   | 0.6% (2.8%, -1.5%)          |
| 694 | Ethiopia    | Nazret             | 377,819    | 1/28/2020 | 44.3 (39.4, 43.9, 49.5)     | 45.8 (41.6, 46.1, 50.0)     | 1.5   | -0.9% (1.2%, -3.0%)         |

|     |         |                           |            |           |                             |                            |       |                             |
|-----|---------|---------------------------|------------|-----------|-----------------------------|----------------------------|-------|-----------------------------|
| 695 | Finland | Helsinki                  | 1,304,851  | 2/6/2020  | 114.1 (81.8, 98.4, 125.8)   | 90.0 (74.2, 87.3, 103.3)   | -24.1 | -4.5% (2.7%, -11.3%)        |
| 696 | Finland | Tampere                   | 341,582    | 2/6/2020  | 104.6 (69.5, 85.1, 109.8)   | 81.2 (65.7, 80.1, 94.8)    | -23.4 | -7.9% (1.0%, -16.1%)        |
| 697 | France  | Avignon                   | 469,504    | 1/23/2020 | 90.0 (74.3, 89.7, 101.1)    | 85.0 (73.4, 82.9, 91.9)    | -5.0  | -0.5% (2.0%, -2.9%)         |
| 698 | France  | B?hune                    | 358,084    | 1/23/2020 | 98.3 (72.8, 89.9, 111.3)    | 90.7 (72.6, 86.0, 101.0)   | -7.6  | 3.8% (8.0%, -0.2%)          |
| 699 | France  | Bordeaux                  | 968,993    | 1/23/2020 | 78.1 (62.9, 79.0, 93.4)     | 73.6 (62.5, 73.6, 85.3)    | -4.5  | -1.8% (2.4%, -5.8%)         |
| 700 | France  | Douai-Lens                | 500,776    | 1/23/2020 | 101.6 (77.9, 97.6, 118.1)   | 92.2 (74.7, 87.4, 106.2)   | -9.4  | 0.5% (5.4%, -4.3%)          |
| 701 | France  | Grenoble                  | 527,720    | 1/23/2020 | 98.3 (81.5, 92.3, 105.2)    | 81.2 (68.5, 79.7, 88.9)    | -17.1 | -0.8% (2.5%, -3.9%)         |
| 702 | France  | Lille                     | 1,063,085  | 1/23/2020 | 114.2 (82.3, 104.0, 137.2)  | 99.3 (76.7, 97.4, 118.2)   | -14.9 | <b>5.0% (9.1%, 1.0%)</b>    |
| 703 | France  | Lyon                      | 1,719,268  | 1/23/2020 | 107.1 (84.5, 98.7, 116.8)   | 95.4 (75.4, 88.5, 104.7)   | -11.7 | -3.2% (2.3%, -8.5%)         |
| 704 | France  | Marseille-Aix-en-Provence | 1,608,236  | 1/23/2020 | 99.8 (76.0, 94.6, 115.1)    | 93.9 (78.4, 89.1, 102.7)   | -5.9  | -1.8% (0.7%, -4.3%)         |
| 705 | France  | Montpellier               | 462,162    | 1/23/2020 | 84.5 (70.0, 84.1, 97.1)     | 77.4 (67.2, 76.6, 86.4)    | -7.1  | -0.8% (1.6%, -3.2%)         |
| 706 | France  | Nantes                    | 677,766    | 1/23/2020 | 79.9 (62.7, 80.4, 95.0)     | 73.6 (62.3, 72.2, 83.7)    | -6.3  | -1.5% (1.8%, -4.7%)         |
| 707 | France  | Nice-Cannes               | 942,208    | 1/23/2020 | 94.2 (80.7, 94.1, 106.7)    | 81.9 (69.2, 81.3, 91.2)    | -12.3 | <b>-3.7% (-0.9%, -6.5%)</b> |
| 708 | France  | Paris                     | 11,017,230 | 1/23/2020 | 163.1 (103.8, 143.8, 188.5) | 123.2 (84.5, 112.5, 140.8) | -39.9 | -0.2% (3.7%, -3.9%)         |
| 709 | France  | Rennes                    | 353,897    | 1/23/2020 | 77.2 (61.1, 76.6, 92.6)     | 75.3 (63.7, 75.1, 85.0)    | -1.9  | -0.2% (2.9%, -3.1%)         |
| 710 | France  | Rouen                     | 470,004    | 1/23/2020 | 90.6 (68.8, 84.9, 102.6)    | 82.7 (67.0, 83.3, 95.3)    | -7.9  | 2.7% (7.5%, -1.9%)          |
| 711 | France  | Saint-?ienne              | 374,879    | 1/23/2020 | 83.8 (69.0, 83.3, 92.1)     | 75.3 (64.9, 74.7, 83.8)    | -8.5  | -1.4% (3.0%, -5.6%)         |
| 712 | France  | Strasbourg                | 475,227    | 1/23/2020 | 108.8 (82.5, 100.2, 124.2)  | 91.9 (76.5, 88.6, 103.6)   | -16.9 | 0.5% (4.3%, -3.2%)          |
| 713 | France  | Toulon                    | 579,095    | 1/23/2020 | 93.8 (77.6, 92.4, 107.1)    | 86.9 (74.2, 84.3, 98.1)    | -6.9  | -1.6% (0.7%, -3.9%)         |
| 714 | France  | Toulouse                  | 1,024,167  | 1/23/2020 | 81.4 (66.6, 80.3, 94.0)     | 77.6 (64.6, 76.5, 86.6)    | -3.8  | <b>-2.9% (-0.6%, -5.1%)</b> |
| 715 | France  | Tours                     | 360,360    | 1/23/2020 | 78.0 (62.4, 79.2, 90.4)     | 73.6 (62.8, 73.6, 82.5)    | -4.4  | 1.4% (4.3%, -1.5%)          |
| 716 | France  | Valenciennes              | 338,077    | 1/23/2020 | 107.3 (80.8, 98.1, 121.7)   | 95.0 (76.1, 88.7, 108.7)   | -12.4 | 2.6% (6.7%, -1.5%)          |

|     |         |                      |           |           |                             |                             |       |                              |
|-----|---------|----------------------|-----------|-----------|-----------------------------|-----------------------------|-------|------------------------------|
| 717 | Gabon   | Libreville           | 834,204   | 2/7/2020  | 50.7 (44.5, 50.5, 55.8)     | 51.0 (44.8, 51.6, 57.1)     | 0.3   | -2.0% (1.5%, -5.4%)          |
| 718 | Gambia  | Banjul               | 450,689   | 3/18/2020 | 56.9 (51.1, 56.8, 62.8)     | 55.3 (50.1, 54.6, 58.7)     | -1.7  | <b>2.6% (4.6%, 0.5%)</b>     |
| 719 | Georgia | Tbilisi              | 1,077,833 | 1/28/2020 | 82.8 (67.9, 81.2, 93.4)     | 78.7 (64.3, 75.6, 87.9)     | -4.1  | -2.3% (0.2%, -4.7%)          |
| 720 | Germany | Berlin               | 3,562,038 | 2/26/2020 | 121.0 (90.4, 110.6, 141.5)  | 100.3 (86.5, 95.7, 110.0)   | -20.7 | -6.5% (0.2%, -12.7%)         |
| 721 | Germany | Bielefeld            | 334,489   | 2/26/2020 | 120.3 (89.1, 102.7, 133.7)  | 99.1 (83.3, 90.6, 106.5)    | -21.2 | -4.4% (3.0%, -11.3%)         |
| 722 | Germany | Bochum               | 375,992   | 2/26/2020 | 158.7 (106.1, 131.9, 185.4) | 130.4 (97.4, 117.8, 149.7)  | -28.3 | -6.3% (1.0%, -13.2%)         |
| 723 | Germany | Bonn                 | 320,194   | 2/26/2020 | 132.4 (93.6, 115.1, 151.8)  | 116.0 (88.8, 104.3, 133.8)  | -16.4 | <b>3.8% (6.5%, 1.1%)</b>     |
| 724 | Germany | Bremen               | 565,354   | 2/26/2020 | 115.9 (84.5, 101.6, 127.1)  | 98.8 (84.2, 96.1, 108.5)    | -17.2 | -4.2% (3.8%, -11.6%)         |
| 725 | Germany | Dortmund             | 589,600   | 2/26/2020 | 153.5 (102.1, 129.5, 181.7) | 129.5 (97.5, 115.2, 143.9)  | -24.1 | <b>-7.4% (-0.2%, -14.1%)</b> |
| 726 | Germany | Duisburg             | 515,076   | 2/26/2020 | 170.5 (115.5, 148.9, 207.2) | 145.4 (112.3, 135.4, 154.7) | -25.1 | -2.8% (2.5%, -7.8%)          |
| 727 | Germany | Duesseldorf          | 631,942   | 2/26/2020 | 168.7 (116.4, 145.6, 205.2) | 138.8 (101.6, 129.4, 158.4) | -29.9 | -0.1% (5.9%, -5.6%)          |
| 728 | Germany | Essen                | 582,128   | 2/26/2020 | 155.8 (107.7, 131.3, 177.9) | 130.9 (98.9, 119.5, 143.6)  | -24.9 | -7.0% (0.2%, -13.7%)         |
| 729 | Germany | Frankfurt am Main    | 777,156   | 2/26/2020 | 147.2 (106.9, 130.7, 171.3) | 116.8 (93.8, 109.8, 127.5)  | -30.4 | -6.3% (0.7%, -12.8%)         |
| 730 | Germany | Hamburg              | 1,789,954 | 2/26/2020 | 125.5 (86.4, 108.1, 136.8)  | 106.1 (84.4, 100.7, 120.8)  | -19.4 | -2.4% (5.6%, -9.8%)          |
| 731 | Germany | Hannover             | 536,976   | 2/26/2020 | 109.9 (85.4, 98.0, 124.7)   | 96.6 (82.8, 92.5, 104.1)    | -13.2 | -3.1% (3.6%, -9.4%)          |
| 732 | Germany | Karlsruhe            | 318,064   | 2/26/2020 | 120.2 (87.2, 109.2, 136.8)  | 96.8 (81.3, 93.2, 103.3)    | -23.5 | 1.1% (3.8%, -1.5%)           |
| 733 | Germany | K?n (Cologne)        | 1,118,789 | 2/26/2020 | 163.4 (110.5, 141.1, 193.9) | 137.9 (102.9, 125.3, 152.9) | -25.5 | 0.4% (3.2%, -2.3%)           |
| 734 | Germany | Mannheim             | 331,670   | 2/26/2020 | 142.6 (98.4, 122.0, 164.9)  | 110.9 (89.1, 101.7, 121.9)  | -31.8 | -0.7% (3.6%, -4.8%)          |
| 735 | Germany | M?chen (Munich)      | 1,538,302 | 2/26/2020 | 126.8 (88.4, 106.3, 138.8)  | 97.8 (81.4, 91.0, 110.3)    | -29.1 | <b>2.8% (5.4%, 0.2%)</b>     |
| 736 | Germany | Muenster (Westfalen) | 329,913   | 2/26/2020 | 130.5 (89.1, 108.9, 144.8)  | 102.7 (85.5, 97.8, 109.5)   | -27.8 | -1.7% (6.2%, -9.0%)          |
| 737 | Germany | Nurenberg            | 511,941   | 2/26/2020 | 114.0 (86.8, 104.5, 128.3)  | 98.4 (80.6, 92.2, 107.6)    | -15.6 | 1.6% (4.2%, -0.9%)           |

|     |           |                                         |           |           |                             |                            |       |                             |
|-----|-----------|-----------------------------------------|-----------|-----------|-----------------------------|----------------------------|-------|-----------------------------|
| 738 | Germany   | Stuttgart                               | 632,692   | 2/26/2020 | 119.5 (89.7, 105.9, 137.5)  | 99.4 (82.0, 91.0, 106.3)   | -20.1 | 2.1% (4.4%, -0.1%)          |
| 739 | Germany   | Wuppertal                               | 349,306   | 2/26/2020 | 149.6 (101.0, 120.6, 164.5) | 118.5 (93.4, 108.3, 130.2) | -31.0 | -2.3% (3.4%, -7.7%)         |
| 740 | Germany   | Dresden                                 | 575,476   | 2/26/2020 | 117.0 (88.8, 102.8, 127.1)  | 95.4 (83.5, 91.6, 103.4)   | -21.6 | -5.2% (0.1%, -10.2%)        |
| 741 | Germany   | Leipzig                                 | 591,052   | 2/26/2020 | 110.0 (86.2, 101.2, 121.3)  | 96.6 (83.3, 93.5, 106.6)   | -13.4 | -1.3% (3.1%, -5.5%)         |
| 742 | Ghana     | Accra                                   | 2,514,005 | 1/24/2020 | 53.3 (45.0, 50.7, 57.4)     | 50.3 (43.3, 48.8, 55.4)    | -3.0  | 1.7% (4.6%, -1.2%)          |
| 743 | Ghana     | Kumasi                                  | 3,348,062 | 1/24/2020 | 55.6 (45.5, 52.0, 63.4)     | 55.2 (47.3, 52.8, 59.3)    | -0.4  | 0.7% (3.4%, -1.9%)          |
| 744 | Ghana     | Sekondi Takoradi                        | 945,519   | 1/24/2020 | 45.8 (40.0, 44.8, 50.7)     | 45.4 (41.8, 45.8, 48.8)    | -0.4  | 1.2% (3.2%, -0.8%)          |
| 745 | Ghana     | Tamale                                  | 641,911   | 1/24/2020 | 54.9 (45.1, 53.4, 63.0)     | 50.4 (45.1, 49.1, 54.0)    | -4.5  | -0.9% (1.2%, -3.0%)         |
| 746 | Greece    | Ath?ai (Athens)                         | 3,153,355 | 2/29/2020 | 114.9 (84.5, 102.4, 125.1)  | 103.9 (87.3, 97.6, 112.5)  | -11.0 | -0.3% (2.8%, -3.3%)         |
| 747 | Greece    | Thessaloniki                            | 812,166   | 2/29/2020 | 104.6 (83.1, 97.0, 115.5)   | 89.8 (79.5, 87.5, 97.7)    | -14.8 | <b>-2.1% (-0.7%, -3.4%)</b> |
| 748 | Guatemala | Ciudad de Guatemala<br>(Guatemala City) | 2,934,841 | 1/21/2020 | 75.2 (59.3, 71.6, 88.6)     | 73.7 (60.7, 70.7, 84.5)    | -1.5  | -0.4% (1.3%, -2.2%)         |
| 749 | Guinea    | Conakry                                 | 1,938,272 | 3/7/2020  | 59.5 (48.6, 57.8, 67.0)     | 62.4 (51.6, 59.4, 67.9)    | 3.0   | -1.2% (0.8%, -3.1%)         |
| 750 | Haiti     | Port-au-Prince                          | 2,773,553 | 2/4/2020  | 90.3 (74.3, 87.3, 102.3)    | 82.6 (72.2, 80.7, 92.4)    | -7.7  | 0.5% (1.7%, -0.6%)          |
| 751 | Honduras  | San Pedro Sula                          | 902,751   | 3/13/2020 | 92.0 (58.9, 80.0, 110.9)    | 104.7 (68.9, 84.1, 111.4)  | 12.7  | <b>3.7% (7.0%, 0.5%)</b>    |
| 752 | Honduras  | Tegucigalpa                             | 1,444,085 | 3/13/2020 | 49.9 (41.6, 49.2, 56.5)     | 53.7 (46.2, 51.0, 57.7)    | 3.8   | -0.3% (0.9%, -1.6%)         |
| 753 | Hungary   | Budapest                                | 1,768,073 | 3/9/2020  | 121.0 (91.5, 106.2, 134.0)  | 98.8 (82.8, 92.0, 105.9)   | -22.2 | 0.4% (2.7%, -1.9%)          |
| 754 | India     | Agartala                                | 575,073   | 1/26/2020 | 73.6 (63.1, 72.1, 81.2)     | 76.3 (67.0, 74.5, 83.3)    | 2.7   | 1.2% (3.9%, -1.5%)          |

|     |       |            |            |           |                            |                            |       |                             |
|-----|-------|------------|------------|-----------|----------------------------|----------------------------|-------|-----------------------------|
| 755 | India | Agra       | 2,210,246  | 1/26/2020 | 106.1 (87.3, 103.1, 120.6) | 94.6 (82.3, 94.9, 105.6)   | -11.5 | <b>-3.3% (-1.5%, -5.1%)</b> |
| 756 | India | Ahmadabad  | 8,059,441  | 1/26/2020 | 130.2 (98.3, 125.1, 151.3) | 108.5 (83.8, 96.0, 116.1)  | -21.7 | <b>-6.5% (-4.7%, -8.2%)</b> |
| 757 | India | Ahmadnagar | 404,238    | 1/26/2020 | 66.8 (55.6, 66.2, 78.4)    | 66.0 (59.3, 66.6, 72.8)    | -0.9  | -1.0% (0.1%, -2.2%)         |
| 758 | India | Aizawl     | 369,648    | 1/26/2020 | 58.1 (47.8, 53.4, 64.2)    | 61.0 (51.0, 56.5, 67.1)    | 2.8   | -0.8% (0.8%, -2.4%)         |
| 759 | India | Ajmer      | 613,617    | 1/26/2020 | 78.4 (66.8, 76.0, 86.0)    | 78.9 (70.5, 75.9, 85.1)    | 0.5   | <b>-1.7% (-0.2%, -3.1%)</b> |
| 760 | India | Akola      | 450,707    | 1/26/2020 | 70.5 (57.8, 68.8, 81.3)    | 72.4 (64.4, 70.7, 79.7)    | 1.8   | -0.5% (1.1%, -2.1%)         |
| 761 | India | Aligarh    | 1,210,554  | 1/26/2020 | 108.0 (85.6, 101.5, 119.4) | 97.4 (85.8, 97.9, 107.2)   | -10.7 | <b>-2.4% (-0.1%, -4.6%)</b> |
| 762 | India | Allahabad  | 1,393,723  | 1/26/2020 | 101.2 (80.2, 94.3, 113.3)  | 91.5 (77.3, 86.6, 98.8)    | -9.7  | -1.2% (1.1%, -3.4%)         |
| 763 | India | Alwar      | 429,275    | 1/26/2020 | 82.6 (70.3, 79.4, 92.6)    | 82.6 (72.5, 80.9, 91.5)    | 0.0   | <b>-3.0% (-1.3%, -4.5%)</b> |
| 764 | India | Amravati   | 752,189    | 1/26/2020 | 73.5 (59.9, 70.7, 83.8)    | 70.4 (61.7, 69.5, 78.4)    | -3.1  | <b>-2.4% (-0.5%, -4.4%)</b> |
| 765 | India | Amritsar   | 1,377,371  | 1/26/2020 | 114.1 (90.7, 106.3, 131.7) | 101.3 (83.3, 99.5, 118.3)  | -12.8 | -2.1% (1.2%, -5.2%)         |
| 766 | India | Anand      | 371,559    | 1/26/2020 | 82.4 (71.8, 81.7, 91.8)    | 78.7 (72.0, 77.4, 85.8)    | -3.8  | 0.6% (2.5%, -1.2%)          |
| 767 | India | Anantapur  | 448,883    | 1/26/2020 | 62.2 (50.3, 58.9, 73.3)    | 61.7 (53.8, 61.2, 69.7)    | -0.5  | <b>-2.4% (-0.8%, -3.9%)</b> |
| 768 | India | Ranipet    | 355,812    | 1/26/2020 | 62.0 (49.2, 59.9, 74.2)    | 57.3 (50.0, 57.6, 64.3)    | -4.7  | 0.1% (2.6%, -2.5%)          |
| 769 | India | Arrah      | 329,370    | 1/26/2020 | 82.9 (66.0, 77.8, 98.0)    | 81.7 (69.3, 78.1, 89.6)    | -1.1  | -0.8% (1.2%, -2.8%)         |
| 770 | India | Asansol    | 1,431,260  | 1/26/2020 | 133.2 (95.3, 123.2, 158.3) | 124.4 (92.5, 112.6, 142.9) | -8.8  | <b>-3.4% (-0.5%, -6.2%)</b> |
| 771 | India | Aurangabad | 1,558,412  | 1/26/2020 | 70.9 (58.8, 68.8, 81.6)    | 69.3 (61.7, 68.7, 76.4)    | -1.6  | <b>-2.2% (-0.7%, -3.6%)</b> |
| 772 | India | Baharampur | 407,130    | 1/26/2020 | 91.6 (72.4, 87.1, 103.2)   | 88.6 (73.8, 82.0, 93.8)    | -3.0  | 0.2% (2.6%, -2.1%)          |
| 773 | India | Bangalore  | 12,326,532 | 1/26/2020 | 99.2 (62.8, 88.9, 127.6)   | 85.3 (65.3, 77.0, 98.5)    | -13.9 | <b>-7.8% (-5.7%, -9.8%)</b> |
| 774 | India | Barddhaman | 414,308    | 1/26/2020 | 92.4 (73.2, 88.1, 100.8)   | 89.3 (76.5, 84.9, 95.6)    | -3.2  | -1.8% (0.6%, -4.1%)         |
| 775 | India | Bareilly   | 1,255,287  | 1/26/2020 | 87.7 (71.8, 84.0, 100.9)   | 84.4 (74.4, 83.0, 91.9)    | -3.4  | -1.7% (0.7%, -4.1%)         |
| 776 | India | Bathinda   | 367,767    | 1/26/2020 | 99.0 (82.2, 96.2, 111.9)   | 96.0 (81.2, 97.0, 110.1)   | -3.0  | <b>-3.4% (-0.9%, -5.9%)</b> |
| 777 | India | Belgaum    | 724,747    | 1/26/2020 | 60.3 (48.3, 56.3, 70.5)    | 57.8 (50.3, 57.1, 66.6)    | -2.5  | -0.9% (0.8%, -2.6%)         |

|     |       |                    |            |           |                            |                            |       |                              |
|-----|-------|--------------------|------------|-----------|----------------------------|----------------------------|-------|------------------------------|
| 778 | India | Bellary            | 520,926    | 1/26/2020 | 74.1 (54.3, 66.5, 85.9)    | 73.8 (59.1, 71.4, 81.1)    | -0.3  | <b>-3.3% (-1.5%, -5.1%)</b>  |
| 779 | India | Bhagalpur          | 479,101    | 1/26/2020 | 100.3 (73.2, 87.0, 114.9)  | 96.6 (74.9, 84.9, 109.4)   | -3.8  | 1.6% (4.6%, -1.3%)           |
| 780 | India | Bhavnagar          | 700,367    | 1/26/2020 | 74.1 (65.5, 72.5, 81.1)    | 70.5 (64.2, 69.0, 76.4)    | -3.7  | -0.9% (0.4%, -2.2%)          |
| 781 | India | Bhilwara           | 452,209    | 1/26/2020 | 79.0 (66.9, 75.5, 86.6)    | 76.5 (67.7, 73.3, 80.7)    | -2.6  | 2.0% (4.8%, -0.7%)           |
| 782 | India | Bhiwandi           | 859,435    | 1/26/2020 | 103.2 (80.3, 97.1, 115.3)  | 90.3 (73.8, 81.7, 98.1)    | -12.9 | <b>-2.7% (-0.9%, -4.4%)</b>  |
| 783 | India | Bhopal             | 2,389,547  | 1/26/2020 | 72.6 (61.5, 70.9, 83.3)    | 70.0 (62.5, 69.6, 77.4)    | -2.6  | -0.4% (1.5%, -2.4%)          |
| 784 | India | Bhubaneswar        | 1,162,886  | 1/26/2020 | 82.4 (66.9, 78.9, 90.2)    | 73.4 (62.7, 69.7, 78.9)    | -9.0  | <b>-2.0% (-0.3%, -3.6%)</b>  |
| 785 | India | Bihar Sharif       | 373,322    | 1/26/2020 | 84.2 (68.2, 79.1, 97.2)    | 82.6 (69.7, 77.5, 89.4)    | -1.6  | 0.7% (2.7%, -1.2%)           |
| 786 | India | Bijapur            | 413,766    | 1/26/2020 | 64.9 (52.1, 61.4, 75.6)    | 64.8 (56.4, 63.1, 72.5)    | -0.1  | -0.9% (0.5%, -2.3%)          |
| 787 | India | Bikaner            | 771,878    | 1/26/2020 | 72.7 (65.0, 72.1, 79.3)    | 71.8 (66.9, 71.4, 77.3)    | -0.8  | -1.4% (0.1%, -2.8%)          |
| 788 | India | Bilaspur           | 599,812    | 1/26/2020 | 138.7 (84.0, 105.4, 149.2) | 108.4 (77.1, 89.2, 113.3)  | -30.4 | -3.9% (1.5%, -9.1%)          |
| 789 | India | Bokaro Steel City  | 633,551    | 1/26/2020 | 136.6 (97.1, 127.0, 166.7) | 117.6 (89.0, 109.8, 142.0) | -19.0 | 0.2% (4.5%, -3.9%)           |
| 790 | India | Mumbai (Bombay)    | 20,411,274 | 1/26/2020 | 146.4 (88.4, 123.9, 179.7) | 104.8 (70.8, 80.5, 119.3)  | -41.6 | <b>-4.7% (-1.5%, -7.8%)</b>  |
| 791 | India | Brahmapur          | 408,412    | 1/26/2020 | 64.4 (53.6, 61.5, 73.4)    | 61.0 (54.7, 61.1, 66.9)    | -3.4  | 0.1% (1.6%, -1.4%)           |
| 792 | India | Kolkata (Calcutta) | 14,850,066 | 1/26/2020 | 127.3 (92.2, 117.4, 148.8) | 112.3 (82.9, 97.2, 129.0)  | -15.0 | <b>-2.7% (-0.4%, -5.1%)</b>  |
| 793 | India | Chandigarh         | 1,148,472  | 1/26/2020 | 102.6 (82.5, 97.0, 116.6)  | 89.0 (78.2, 88.6, 98.6)    | -13.7 | <b>-4.1% (-1.8%, -6.4%)</b>  |
| 794 | India | Chandrapur         | 351,869    | 1/26/2020 | 161.5 (90.2, 136.5, 202.4) | 147.2 (99.3, 127.4, 169.0) | -14.3 | <b>-5.5% (-0.5%, -10.2%)</b> |
| 795 | India | Cherthala          | 764,135    | 1/26/2020 | 53.0 (46.9, 52.7, 58.6)    | 52.1 (46.3, 51.5, 56.1)    | -0.9  | <b>-5.4% (-2.7%, -7.9%)</b>  |

|     |       |                  |            |           |                             |                             |       |                              |
|-----|-------|------------------|------------|-----------|-----------------------------|-----------------------------|-------|------------------------------|
| 796 | India | Coimbatore       | 2,786,600  | 1/26/2020 | 67.5 (53.5, 64.1, 79.8)     | 62.6 (55.0, 60.6, 69.7)     | -4.9  | <b>-3.6% (-2.1%, -5.1%)</b>  |
| 797 | India | Kadapa           | 443,336    | 1/26/2020 | 64.6 (48.8, 60.6, 79.2)     | 61.6 (54.0, 61.0, 69.6)     | -3.0  | -1.0% (0.6%, -2.6%)          |
| 798 | India | Cuttack          | 742,011    | 1/26/2020 | 83.5 (65.8, 79.0, 92.3)     | 78.5 (65.5, 71.5, 83.1)     | -5.0  | 0.1% (2.2%, -1.9%)           |
| 799 | India | Darbhanga        | 350,958    | 1/26/2020 | 81.2 (67.7, 78.4, 91.5)     | 79.8 (69.3, 76.3, 83.7)     | -1.4  | <b>3.1% (5.2%, 1.2%)</b>     |
| 800 | India | Davanagere       | 511,843    | 1/26/2020 | 58.1 (48.0, 55.9, 67.3)     | 58.0 (52.1, 58.5, 64.0)     | -0.1  | -1.2% (0.1%, -2.4%)          |
| 801 | India | Dehradun         | 918,946    | 1/26/2020 | 78.3 (67.7, 75.5, 87.4)     | 76.2 (69.0, 76.3, 83.1)     | -2.1  | -0.7% (0.7%, -2.0%)          |
| 802 | India | Delhi            | 30,290,936 | 1/26/2020 | 199.9 (130.8, 166.6, 215.1) | 140.7 (103.9, 129.2, 159.1) | -59.2 | <b>-9.0% (-6.1%, -11.7%)</b> |
| 803 | India | Dewas            | 355,513    | 1/26/2020 | 70.4 (59.6, 67.4, 80.8)     | 68.8 (59.9, 68.4, 77.3)     | -1.6  | <b>3.3% (5.5%, 1.0%)</b>     |
| 804 | India | Dhanbad          | 1,331,186  | 1/26/2020 | 118.4 (87.0, 111.1, 138.9)  | 107.0 (85.6, 100.9, 120.4)  | -11.5 | 0.1% (2.8%, -2.5%)           |
| 805 | India | Dhule            | 409,759    | 1/26/2020 | 68.0 (57.2, 67.3, 76.7)     | 66.9 (61.0, 66.9, 72.8)     | -1.1  | -0.9% (0.3%, -2.2%)          |
| 806 | India | Dindigul         | 385,742    | 1/26/2020 | 55.4 (46.1, 53.7, 64.2)     | 57.5 (49.5, 57.6, 63.7)     | 2.1   | -0.5% (1.0%, -1.9%)          |
| 807 | India | Durg-Bhilainagar | 1,207,637  | 1/26/2020 | 122.9 (73.5, 94.2, 139.1)   | 92.3 (67.9, 79.7, 92.5)     | -30.6 | <b>-7.9% (-3.1%, -12.5%)</b> |
| 808 | India | Durgapur         | 675,384    | 1/26/2020 | 192.7 (106.2, 174.6, 252.4) | 159.6 (100.4, 134.6, 187.6) | -33.2 | <b>-6.1% (-1.1%, -10.8%)</b> |
| 809 | India | English Bazar    | 426,793    | 1/26/2020 | 85.4 (68.6, 80.7, 96.0)     | 88.6 (72.2, 82.0, 96.5)     | 3.2   | 1.2% (3.3%, -0.9%)           |
| 810 | India | Erode            | 634,977    | 1/26/2020 | 66.6 (53.7, 66.5, 78.0)     | 65.4 (59.6, 65.0, 71.9)     | -1.2  | -1.0% (1.0%, -3.0%)          |
| 811 | India | Farrukhabad      | 344,412    | 1/26/2020 | 82.6 (69.5, 80.6, 92.4)     | 82.4 (73.1, 80.7, 88.8)     | -0.2  | -0.2% (2.3%, -2.6%)          |
| 812 | India | Firozabad        | 821,043    | 1/26/2020 | 115.2 (91.7, 109.1, 131.5)  | 101.2 (84.8, 97.3, 112.5)   | -14.0 | <b>-4.7% (-1.4%, -8.0%)</b>  |
| 813 | India | Gandhidham       | 389,587    | 1/26/2020 | 81.8 (69.5, 78.4, 87.2)     | 74.7 (66.1, 72.5, 80.5)     | -7.1  | <b>-1.9% (-0.5%, -3.4%)</b>  |
| 814 | India | Gaya             | 565,253    | 1/26/2020 | 84.7 (69.5, 80.4, 96.6)     | 82.5 (70.0, 77.4, 87.9)     | -2.2  | 0.3% (2.2%, -1.6%)           |

|     |       |                        |            |           |                            |                          |       |                             |
|-----|-------|------------------------|------------|-----------|----------------------------|--------------------------|-------|-----------------------------|
| 815 | India | Gorakhpur              | 758,214    | 1/26/2020 | 88.8 (73.6, 86.2, 102.4)   | 83.9 (72.2, 81.9, 91.5)  | -4.9  | -0.8% (1.4%, -3.0%)         |
| 816 | India | Gulbarga               | 673,027    | 1/26/2020 | 69.4 (55.7, 64.6, 82.2)    | 70.3 (60.5, 69.4, 79.2)  | 1.0   | -1.1% (0.1%, -2.3%)         |
| 817 | India | Guntur                 | 854,488    | 1/26/2020 | 71.5 (56.1, 67.4, 81.2)    | 66.2 (55.6, 63.4, 72.7)  | -5.2  | -0.7% (1.3%, -2.6%)         |
| 818 | India | Guwahati (Gauhati)     | 1,116,740  | 1/26/2020 | 77.1 (64.8, 73.4, 84.1)    | 81.0 (68.0, 75.6, 84.8)  | 3.9   | 1.5% (3.5%, -0.4%)          |
| 819 | India | Gwalior                | 1,378,375  | 1/26/2020 | 81.3 (69.9, 80.0, 91.5)    | 79.5 (69.7, 77.6, 89.0)  | -1.8  | -0.5% (1.7%, -2.7%)         |
| 820 | India | Habra                  | 348,366    | 1/26/2020 | 84.2 (69.3, 79.5, 93.7)    | 84.8 (74.0, 80.2, 88.4)  | 0.6   | 1.5% (4.3%, -1.4%)          |
| 821 | India | Haldwani-cum-kathgodam | 328,798    | 1/26/2020 | 71.3 (58.8, 67.8, 79.3)    | 69.8 (61.3, 68.0, 75.2)  | -1.5  | 0.2% (2.4%, -1.9%)          |
| 822 | India | Hapur                  | 320,713    | 1/26/2020 | 113.2 (85.2, 101.8, 125.6) | 97.3 (83.9, 95.4, 106.7) | -15.9 | -1.8% (0.6%, -4.2%)         |
| 823 | India | Hardwar                | 425,643    | 1/26/2020 | 79.1 (65.9, 76.0, 90.3)    | 78.8 (70.8, 78.6, 85.4)  | -0.2  | -0.7% (0.8%, -2.2%)         |
| 824 | India | Hisar                  | 353,859    | 1/26/2020 | 88.6 (75.3, 86.3, 98.8)    | 87.8 (74.7, 86.1, 97.2)  | -0.8  | <b>-1.8% (-0.5%, -3.0%)</b> |
| 825 | India | Hubli-Dharwad          | 1,116,728  | 1/26/2020 | 58.8 (49.3, 55.6, 67.6)    | 57.3 (50.1, 55.4, 64.1)  | -1.5  | 0.1% (1.1%, -1.0%)          |
| 826 | India | Hyderabad              | 10,004,144 | 1/26/2020 | 104.7 (76.7, 102.2, 127.4) | 91.8 (74.1, 86.6, 107.0) | -12.9 | <b>-5.9% (-4.0%, -7.8%)</b> |
| 827 | India | Ichalkaranji           | 366,914    | 1/26/2020 | 68.0 (52.5, 63.3, 82.2)    | 66.3 (56.6, 67.2, 75.3)  | -1.7  | -0.6% (0.8%, -1.9%)         |
| 828 | India | Imphal                 | 575,625    | 1/26/2020 | 61.3 (50.9, 57.7, 66.7)    | 63.2 (52.9, 59.9, 68.0)  | 1.9   | -0.1% (1.4%, -1.6%)         |
| 829 | India | Indore                 | 3,016,713  | 1/26/2020 | 79.8 (65.8, 77.8, 91.5)    | 73.7 (64.4, 72.7, 82.0)  | -6.1  | <b>-2.4% (-0.6%, -4.3%)</b> |
| 830 | India | Jabalpur               | 1,449,787  | 1/26/2020 | 73.4 (61.6, 71.0, 83.8)    | 71.0 (62.2, 69.5, 78.0)  | -2.5  | -0.3% (1.2%, -1.8%)         |
| 831 | India | Jaipur                 | 3,909,333  | 1/26/2020 | 103.5 (83.7, 99.5, 117.5)  | 90.9 (78.8, 88.6, 101.3) | -12.6 | <b>-4.0% (-1.8%, -6.1%)</b> |
| 832 | India | Jalandhar              | 1,053,670  | 1/26/2020 | 106.7 (86.3, 101.5, 125.0) | 94.8 (81.2, 93.8, 107.2) | -11.9 | <b>-3.6% (-0.5%, -6.6%)</b> |
| 833 | India | Jalgaon                | 564,540    | 1/26/2020 | 72.5 (60.5, 70.8, 82.5)    | 69.5 (62.1, 70.3, 75.7)  | -3.0  | <b>-1.7% (-0.1%, -3.3%)</b> |
| 834 | India | Jalna                  | 340,662    | 1/26/2020 | 65.7 (54.5, 64.3, 75.4)    | 67.7 (60.6, 67.0, 74.2)  | 2.0   | -1.0% (0.2%, -2.2%)         |



|     |       |                |           |           |                             |                             |       |                             |
|-----|-------|----------------|-----------|-----------|-----------------------------|-----------------------------|-------|-----------------------------|
| 835 | India | Jamnagar       | 644,738   | 1/26/2020 | 78.4 (65.1, 73.9, 85.9)     | 73.3 (60.0, 68.5, 80.3)     | -5.1  | 1.8% (5.0%, -1.3%)          |
| 836 | India | Jammu          | 702,085   | 1/26/2020 | 86.9 (73.4, 83.7, 97.6)     | 83.9 (74.8, 82.5, 93.9)     | -3.0  | <b>-2.0% (-0.1%, -3.8%)</b> |
| 837 | India | Jamshedpur     | 1,599,434 | 1/26/2020 | 155.0 (100.4, 130.2, 181.7) | 133.9 (88.7, 112.2, 157.0)  | -21.1 | <b>-5.0% (-1.8%, -8.1%)</b> |
| 838 | India | Jhansi         | 642,709   | 1/26/2020 | 80.2 (68.0, 77.9, 91.6)     | 77.4 (67.8, 76.0, 86.4)     | -2.8  | -0.8% (1.6%, -3.1%)         |
| 839 | India | Jodhpur        | 1,471,900 | 1/26/2020 | 82.4 (71.1, 79.9, 90.4)     | 77.1 (68.6, 73.7, 83.5)     | -5.3  | -0.2% (2.1%, -2.5%)         |
| 840 | India | Junagadh       | 397,226   | 1/26/2020 | 64.4 (56.4, 63.8, 70.8)     | 65.4 (58.3, 64.8, 70.5)     | 1.0   | 0.1% (1.9%, -1.7%)          |
| 841 | India | Kakinada       | 514,228   | 1/26/2020 | 65.1 (54.3, 61.8, 73.2)     | 60.8 (53.3, 58.8, 66.2)     | -4.3  | 0.3% (2.4%, -1.9%)          |
| 842 | India | Kanhangad      | 339,695   | 1/26/2020 | 51.5 (45.4, 50.8, 57.5)     | 48.8 (44.0, 49.2, 52.6)     | -2.7  | -1.1% (0.6%, -2.8%)         |
| 843 | India | Kannur         | 2,166,906 | 1/26/2020 | 53.6 (47.1, 53.1, 59.9)     | 50.5 (45.7, 50.4, 54.6)     | -3.1  | <b>-2.5% (-0.5%, -4.5%)</b> |
| 844 | India | Kanpur         | 3,123,990 | 1/26/2020 | 100.6 (80.8, 96.1, 115.4)   | 91.5 (80.1, 89.1, 99.8)     | -9.1  | -1.2% (1.5%, -3.8%)         |
| 845 | India | Karimnagar     | 395,334   | 1/26/2020 | 79.9 (60.1, 71.8, 86.9)     | 71.9 (62.0, 69.4, 78.0)     | -8.1  | -1.4% (0.7%, -3.5%)         |
| 846 | India | Karnal         | 402,417   | 1/26/2020 | 100.2 (78.3, 94.3, 114.9)   | 90.6 (74.5, 90.8, 101.8)    | -9.6  | <b>-4.8% (-1.9%, -7.7%)</b> |
| 847 | India | Karur          | 345,577   | 1/26/2020 | 61.1 (51.0, 60.1, 70.5)     | 61.3 (53.7, 61.4, 67.8)     | 0.2   | <b>-2.2% (-0.7%, -3.7%)</b> |
| 848 | India | Khammam        | 338,657   | 1/26/2020 | 69.8 (55.5, 67.8, 80.7)     | 69.3 (59.0, 65.5, 77.3)     | -0.4  | <b>-1.9% (0.0%, -3.6%)</b>  |
| 849 | India | Kharagpur      | 326,809   | 1/26/2020 | 93.3 (74.0, 87.4, 102.8)    | 86.9 (69.3, 79.8, 93.4)     | -6.5  | -3.3% (0.1%, -6.6%)         |
| 850 | India | Kochi (Cochin) | 3,082,055 | 1/26/2020 | 60.3 (50.5, 58.4, 69.4)     | 55.7 (48.2, 53.2, 62.9)     | -4.6  | <b>-2.2% (0.0%, -4.4%)</b>  |
| 851 | India | Kolhapur       | 619,358   | 1/26/2020 | 68.0 (52.6, 64.3, 83.3)     | 65.0 (53.2, 65.8, 75.4)     | -2.9  | -0.7% (0.6%, -2.1%)         |
| 852 | India | Kollam         | 1,851,558 | 1/26/2020 | 50.1 (44.8, 49.9, 55.9)     | 50.0 (44.7, 48.4, 53.6)     | -0.1  | -0.3% (1.2%, -1.8%)         |
| 853 | India | Korba          | 417,807   | 1/26/2020 | 275.7 (137.5, 221.8, 353.7) | 211.7 (127.2, 175.2, 242.9) | -64.0 | -4.0% (2.5%, -10.1%)        |
| 854 | India | Kota           | 1,386,877 | 1/26/2020 | 102.7 (76.6, 95.0, 112.9)   | 92.1 (75.9, 85.4, 100.9)    | -10.6 | 2.0% (5.9%, -1.7%)          |
| 855 | India | Kottayam       | 696,061   | 1/26/2020 | 54.6 (47.6, 53.0, 60.8)     | 53.4 (47.2, 52.5, 58.8)     | -1.2  | 0.8% (2.1%, -0.4%)          |

|     |       |                     |            |           |                            |                           |       |                             |
|-----|-------|---------------------|------------|-----------|----------------------------|---------------------------|-------|-----------------------------|
| 856 | India | Kozhikode (Calicut) | 3,555,411  | 1/26/2020 | 54.1 (47.7, 53.8, 59.9)    | 50.4 (46.0, 49.4, 54.8)   | -3.7  | <b>-1.7% (0.0%, -3.4%)</b>  |
| 857 | India | Kurnool             | 665,186    | 1/26/2020 | 67.0 (53.7, 62.8, 79.4)    | 68.7 (60.2, 67.7, 76.6)   | 1.7   | -0.7% (0.4%, -1.8%)         |
| 858 | India | Latur               | 479,399    | 1/26/2020 | 63.6 (52.1, 61.9, 73.7)    | 63.6 (55.6, 64.1, 70.9)   | 0.0   | -1.4% (0.3%, -3.1%)         |
| 859 | India | Lucknow             | 3,676,515  | 1/26/2020 | 98.2 (79.2, 94.5, 110.7)   | 90.4 (79.4, 87.7, 96.6)   | -7.9  | <b>-2.2% (-0.5%, -3.9%)</b> |
| 860 | India | Ludhiana            | 1,856,849  | 1/26/2020 | 120.6 (93.2, 112.1, 136.2) | 101.9 (82.4, 98.3, 121.4) | -18.7 | <b>-6.0% (-3.4%, -8.5%)</b> |
| 861 | India | Chennai (Madras)    | 10,971,108 | 1/26/2020 | 85.9 (63.1, 77.7, 99.9)    | 67.4 (53.4, 60.8, 78.9)   | -18.5 | <b>-4.0% (-1.5%, -6.4%)</b> |
| 862 | India | Madurai             | 1,734,173  | 1/26/2020 | 61.1 (50.7, 61.3, 70.7)    | 59.3 (53.3, 60.0, 65.4)   | -1.9  | <b>-2.0% (-0.7%, -3.4%)</b> |
| 863 | India | Malappuram          | 3,391,277  | 1/26/2020 | 54.9 (47.5, 53.6, 61.6)    | 52.6 (47.8, 52.0, 57.1)   | -2.3  | -1.6% (0.1%, -3.2%)         |
| 864 | India | Malegaon            | 715,605    | 1/26/2020 | 67.6 (57.9, 66.6, 75.5)    | 66.2 (60.4, 65.8, 71.7)   | -1.3  | -0.8% (0.3%, -2.0%)         |
| 865 | India | Mangalore           | 713,357    | 1/26/2020 | 66.3 (53.9, 64.1, 76.5)    | 59.6 (50.3, 57.0, 65.7)   | -6.8  | -1.0% (0.6%, -2.7%)         |
| 866 | India | Mathura             | 588,334    | 1/26/2020 | 95.6 (79.7, 92.0, 108.4)   | 89.5 (79.9, 88.6, 98.0)   | -6.1  | <b>-2.3% (-0.1%, -4.5%)</b> |
| 867 | India | Maunath Bhanjan     | 357,540    | 1/26/2020 | 82.6 (68.2, 78.2, 95.5)    | 81.1 (68.6, 78.7, 88.0)   | -1.5  | 0.9% (2.9%, -1.0%)          |
| 868 | India | Meerut              | 1,696,440  | 1/26/2020 | 106.6 (82.3, 99.9, 122.4)  | 94.5 (81.9, 93.3, 103.9)  | -12.1 | <b>-2.0% (-0.2%, -3.9%)</b> |
| 869 | India | Moradabad           | 1,197,000  | 1/26/2020 | 90.3 (74.5, 87.3, 102.0)   | 85.9 (75.5, 85.2, 92.6)   | -4.4  | -0.4% (1.3%, -2.0%)         |
| 870 | India | Morvi               | 346,436    | 1/26/2020 | 94.2 (73.3, 86.3, 107.9)   | 81.1 (65.3, 71.8, 85.4)   | -13.1 | <b>-3.0% (-0.9%, -5.1%)</b> |
| 871 | India | Muzaffarnagar       | 716,748    | 1/26/2020 | 92.4 (75.9, 89.0, 103.9)   | 87.2 (77.2, 86.0, 95.2)   | -5.2  | <b>-2.2% (-0.7%, -3.8%)</b> |
| 872 | India | Muzaffarpur         | 504,158    | 1/26/2020 | 91.7 (74.9, 88.5, 105.9)   | 82.2 (73.0, 78.7, 88.3)   | -9.4  | 1.6% (4.1%, -0.8%)          |
| 873 | India | Mysore              | 1,209,836  | 1/26/2020 | 57.5 (47.2, 55.0, 67.3)    | 56.9 (50.4, 56.7, 61.9)   | -0.6  | <b>-2.2% (-1.1%, -3.3%)</b> |
| 874 | India | Nagpur              | 2,893,455  | 1/26/2020 | 137.2 (83.9, 114.1, 161.4) | 103.6 (79.8, 90.0, 113.3) | -33.6 | <b>-4.7% (-2.4%, -6.9%)</b> |
| 875 | India | Nanded Waghala      | 689,771    | 1/26/2020 | 67.6 (55.4, 65.6, 78.2)    | 68.8 (61.1, 68.5, 76.0)   | 1.2   | -0.2% (1.1%, -1.5%)         |

|     |       |              |           |           |                             |                            |       |                             |
|-----|-------|--------------|-----------|-----------|-----------------------------|----------------------------|-------|-----------------------------|
| 876 | India | Nashik       | 2,065,728 | 1/26/2020 | 79.2 (65.1, 79.2, 89.8)     | 72.6 (64.7, 72.0, 80.6)    | -6.6  | <b>-2.6% (-1.0%, -4.1%)</b> |
| 877 | India | Navsari      | 338,788   | 1/26/2020 | 82.8 (62.9, 75.3, 97.2)     | 72.8 (60.8, 69.1, 80.2)    | -10.0 | <b>3.3% (5.9%, 0.8%)</b>    |
| 878 | India | Nellore      | 751,034   | 1/26/2020 | 65.2 (50.6, 63.9, 79.6)     | 66.5 (56.6, 65.8, 74.6)    | 1.3   | 2.8% (5.8%, -0.1%)          |
| 879 | India | Nizamabad    | 333,462   | 1/26/2020 | 69.5 (55.3, 66.7, 80.5)     | 68.3 (58.5, 66.7, 77.1)    | -1.3  | <b>-2.7% (-0.7%, -4.6%)</b> |
| 880 | India | Palakkad     | 367,565   | 1/26/2020 | 58.6 (49.2, 56.5, 67.0)     | 57.5 (51.3, 56.9, 62.2)    | -1.1  | 0.0% (1.1%, -1.0%)          |
| 881 | India | Panipat      | 547,952   | 1/26/2020 | 136.8 (96.9, 126.1, 155.1)  | 120.2 (96.7, 115.4, 140.2) | -16.6 | -2.1% (0.5%, -4.7%)         |
| 882 | India | Parbhani     | 359,015   | 1/26/2020 | 65.0 (53.7, 63.2, 75.0)     | 65.4 (57.4, 64.4, 71.6)    | 0.4   | 1.1% (2.4%, -0.1%)          |
| 883 | India | Patiala      | 599,186   | 1/26/2020 | 101.2 (81.6, 95.8, 115.7)   | 88.9 (74.3, 85.0, 103.2)   | -12.3 | -2.6% (0.1%, -5.2%)         |
| 884 | India | Patna        | 2,436,447 | 1/26/2020 | 95.1 (77.2, 90.3, 109.9)    | 87.6 (74.0, 83.6, 92.2)    | -7.5  | 0.0% (2.5%, -2.4%)          |
| 885 | India | Puducherry   | 836,003   | 1/26/2020 | 60.8 (47.0, 57.7, 69.3)     | 60.2 (45.8, 54.7, 71.5)    | -0.6  | -1.5% (0.2%, -3.1%)         |
| 886 | India | Pune (Poona) | 6,629,347 | 1/26/2020 | 97.3 (70.1, 93.7, 118.7)    | 83.5 (67.4, 79.1, 93.2)    | -13.8 | <b>-4.0% (-2.5%, -5.4%)</b> |
| 887 | India | Purnia       | 477,567   | 1/26/2020 | 80.2 (66.1, 76.2, 87.7)     | 84.8 (71.0, 76.9, 86.3)    | 4.7   | <b>2.7% (4.9%, 0.5%)</b>    |
| 888 | India | Raipur       | 1,642,169 | 1/26/2020 | 142.9 (89.3, 125.0, 167.8)  | 112.6 (81.3, 101.1, 121.5) | -30.4 | <b>-6.4% (-3.2%, -9.5%)</b> |
| 889 | India | Rajahmundry  | 543,729   | 1/26/2020 | 69.9 (57.8, 68.1, 77.4)     | 66.6 (57.4, 64.3, 71.7)    | -3.3  | <b>-1.9% (-0.3%, -3.5%)</b> |
| 890 | India | Rajkot       | 1,878,032 | 1/26/2020 | 79.3 (67.4, 77.2, 88.4)     | 76.4 (65.6, 74.2, 84.6)    | -2.8  | <b>-1.4% (-0.2%, -2.5%)</b> |
| 891 | India | Rampur       | 425,966   | 1/26/2020 | 86.4 (71.4, 83.5, 96.6)     | 84.3 (75.7, 84.2, 91.9)    | -2.1  | -0.9% (1.8%, -3.6%)         |
| 892 | India | Ranchi       | 1,439,195 | 1/26/2020 | 79.9 (64.3, 76.9, 89.7)     | 74.1 (65.1, 72.9, 80.5)    | -5.8  | 1.1% (3.0%, -0.7%)          |
| 893 | India | Raniganj     | 409,737   | 1/26/2020 | 143.8 (101.7, 127.8, 173.3) | 129.2 (93.9, 110.5, 144.8) | -14.6 | -0.3% (2.8%, -3.3%)         |
| 894 | India | Ratlam       | 316,365   | 1/26/2020 | 68.3 (58.9, 66.9, 76.1)     | 66.5 (58.7, 65.7, 72.3)    | -1.8  | 1.1% (3.1%, -0.9%)          |
| 895 | India | Raurkela     | 622,636   | 1/26/2020 | 117.2 (82.7, 105.5, 138.2)  | 102.5 (81.1, 95.9, 119.6)  | -14.7 | -0.5% (2.5%, -3.5%)         |
| 896 | India | Rohtak       | 466,576   | 1/26/2020 | 99.9 (80.4, 93.8, 111.0)    | 94.4 (80.6, 93.4, 105.1)   | -5.5  | -2.7% (0.1%, -5.4%)         |
| 897 | India | Sagar        | 437,354   | 1/26/2020 | 68.9 (58.6, 66.5, 78.8)     | 67.8 (58.7, 67.1, 75.3)    | -1.1  | -1.1% (1.6%, -3.7%)         |
| 898 | India | Saharanpur   | 1,054,102 | 1/26/2020 | 97.4 (80.2, 93.3, 110.1)    | 88.8 (78.7, 88.0, 96.2)    | -8.7  | <b>-2.1% (-0.2%, -3.9%)</b> |
| 899 | India | Salem        | 1,102,463 | 1/26/2020 | 62.0 (48.8, 59.1, 73.6)     | 62.6 (54.6, 61.7, 69.7)    | 0.7   | <b>-2.1% (-0.8%, -3.4%)</b> |
| 900 | India | Santipur     | 367,014   | 1/26/2020 | 82.8 (68.2, 79.4, 93.0)     | 82.8 (71.6, 79.0, 87.7)    | 0.0   | 2.4% (5.3%, -0.4%)          |

|     |       |                    |           |           |                            |                          |       |                             |
|-----|-------|--------------------|-----------|-----------|----------------------------|--------------------------|-------|-----------------------------|
| 901 | India | Satna              | 343,415   | 1/26/2020 | 102.3 (74.8, 92.7, 113.3)  | 86.5 (68.5, 81.6, 98.6)  | -15.8 | <b>-3.0% (-0.1%, -5.8%)</b> |
| 902 | India | Shahjahanpur       | 373,738   | 1/26/2020 | 97.2 (74.4, 88.5, 108.7)   | 94.6 (75.3, 88.4, 105.0) | -2.6  | -0.5% (0.8%, -1.7%)         |
| 903 | India | Shillong           | 459,698   | 1/26/2020 | 63.1 (53.4, 60.2, 69.3)    | 66.1 (55.3, 62.6, 71.5)  | 3.0   | 0.8% (3.3%, -1.6%)          |
| 904 | India | Shimoga            | 374,643   | 1/26/2020 | 55.4 (45.1, 52.2, 64.3)    | 53.5 (47.8, 53.8, 59.8)  | -1.9  | <b>-1.3% (-0.2%, -2.3%)</b> |
| 905 | India | Siliguri           | 1,020,303 | 1/26/2020 | 76.6 (65.8, 74.8, 84.5)    | 77.1 (64.5, 72.1, 79.6)  | 0.6   | 1.1% (2.6%, -0.3%)          |
| 906 | India | Solapur            | 1,031,037 | 1/26/2020 | 67.3 (53.7, 64.9, 78.4)    | 67.3 (59.4, 67.1, 75.3)  | 0.0   | <b>-1.7% (-0.6%, -2.9%)</b> |
| 907 | India | Srinagar           | 1,585,774 | 1/26/2020 | 74.2 (64.7, 72.7, 83.7)    | 73.0 (66.4, 73.4, 79.0)  | -1.3  | <b>-2.2% (-0.7%, -3.7%)</b> |
| 908 | India | Surat              | 7,184,590 | 1/26/2020 | 109.8 (79.1, 106.7, 129.6) | 98.9 (72.0, 89.7, 114.3) | -11.0 | <b>-3.7% (-1.8%, -5.7%)</b> |
| 909 | India | Thanjavur          | 336,972   | 1/26/2020 | 57.4 (48.8, 57.3, 65.7)    | 57.1 (49.2, 56.0, 62.8)  | -0.3  | <b>-2.6% (-1.0%, -4.2%)</b> |
| 910 | India | Thiruvananthapuram | 2,584,752 | 1/26/2020 | 51.1 (45.4, 50.9, 56.9)    | 49.0 (44.4, 48.7, 53.4)  | -2.1  | -0.9% (0.5%, -2.2%)         |
| 911 | India | Thrissur           | 3,068,164 | 1/26/2020 | 54.9 (48.7, 54.0, 60.6)    | 52.6 (47.9, 51.8, 56.3)  | -2.3  | <b>-2.2% (-0.3%, -4.1%)</b> |
| 912 | India | Tiruchirappalli    | 1,164,668 | 1/26/2020 | 62.8 (54.5, 62.9, 71.0)    | 61.2 (54.3, 59.8, 66.9)  | -1.6  | <b>-1.5% (-0.1%, -2.9%)</b> |
| 913 | India | Tirunelveli        | 565,735   | 1/26/2020 | 52.8 (44.8, 52.5, 60.6)    | 51.7 (44.5, 50.6, 58.0)  | -1.2  | <b>-2.7% (-1.2%, -4.2%)</b> |
| 914 | India | Tirupati           | 679,456   | 1/26/2020 | 62.4 (48.5, 58.1, 75.0)    | 58.9 (52.6, 59.0, 64.8)  | -3.5  | <b>-1.9% (-0.2%, -3.5%)</b> |
| 915 | India | Tiruppur           | 1,496,389 | 1/26/2020 | 63.6 (52.2, 62.4, 73.6)    | 61.9 (55.6, 62.2, 68.0)  | -1.7  | <b>-2.0% (0.0%, -3.9%)</b>  |
| 916 | India | Tumkur             | 361,148   | 1/26/2020 | 60.5 (48.0, 57.8, 71.4)    | 60.6 (52.6, 60.2, 67.1)  | 0.1   | 0.5% (1.8%, -0.7%)          |
| 917 | India | Udaipur            | 569,224   | 1/26/2020 | 80.1 (69.6, 77.7, 88.4)    | 73.6 (65.2, 70.9, 80.8)  | -6.4  | -0.3% (2.0%, -2.4%)         |
| 918 | India | Ujjain             | 607,055   | 1/26/2020 | 69.8 (59.4, 68.0, 78.7)    | 67.8 (60.0, 66.9, 74.7)  | -2.0  | <b>3.6% (5.9%, 1.2%)</b>    |
| 919 | India | Vadodara           | 2,189,973 | 1/26/2020 | 103.7 (80.7, 99.1, 117.7)  | 97.9 (78.7, 92.9, 112.5) | -5.8  | <b>-3.4% (-1.5%, -5.2%)</b> |
| 920 | India | Varanasi (Benares) | 1,664,942 | 1/26/2020 | 102.0 (79.1, 94.1, 114.0)  | 93.2 (78.3, 89.0, 99.1)  | -8.8  | <b>-1.9% (-0.1%, -3.6%)</b> |
| 921 | India | Vellore            | 569,048   | 1/26/2020 | 61.2 (49.8, 59.4, 72.4)    | 58.5 (52.5, 57.9, 64.4)  | -2.7  | -0.6% (1.5%, -2.6%)         |
| 922 | India | Vijayawada         | 2,039,845 | 1/26/2020 | 80.8 (61.8, 74.7, 89.4)    | 70.3 (58.2, 66.2, 77.1)  | -10.5 | -1.6% (0.3%, -3.5%)         |

|     |           |                          |           |           |                            |                           |       |                             |
|-----|-----------|--------------------------|-----------|-----------|----------------------------|---------------------------|-------|-----------------------------|
| 923 | India     | Visakhapatnam            | 2,174,968 | 1/26/2020 | 98.3 (74.0, 93.9, 113.2)   | 94.6 (72.5, 88.2, 108.6)  | -3.7  | <b>-2.8% (0.0%, -5.6%)</b>  |
| 924 | India     | Warangal                 | 959,658   | 1/26/2020 | 73.5 (59.3, 70.2, 84.9)    | 72.5 (59.4, 69.8, 77.9)   | -1.0  | <b>-3.2% (-1.3%, -5.0%)</b> |
| 925 | India     | Yamunanagar              | 450,564   | 1/26/2020 | 110.2 (87.5, 105.5, 124.7) | 97.0 (83.2, 95.4, 109.8)  | -13.2 | <b>-2.8% (-0.7%, -4.8%)</b> |
| 926 | India     | Begusarai                | 467,632   | 1/26/2020 | 96.0 (76.2, 93.9, 111.3)   | 90.9 (75.5, 86.1, 102.0)  | -5.1  | -1.7% (0.7%, -4.1%)         |
| 927 | India     | Deoghar                  | 349,481   | 1/26/2020 | 75.0 (61.2, 70.2, 86.7)    | 75.2 (64.5, 70.1, 79.3)   | 0.2   | 0.8% (2.3%, -0.8%)          |
| 928 | India     | Roorkee                  | 353,570   | 1/26/2020 | 93.1 (76.6, 91.9, 104.9)   | 89.9 (80.4, 90.2, 98.9)   | -3.3  | -1.5% (0.1%, -3.1%)         |
| 929 | India     | Sangli                   | 583,629   | 1/26/2020 | 67.8 (52.1, 65.8, 81.2)    | 67.9 (58.1, 66.7, 77.7)   | 0.2   | <b>-1.1% (0.0%, -2.2%)</b>  |
| 930 | India     | Thoothukkudi (Tuticorin) | 560,930   | 1/26/2020 | 63.9 (47.4, 56.3, 73.0)    | 64.3 (49.5, 57.3, 73.6)   | 0.4   | 0.6% (3.9%, -2.7%)          |
| 931 | India     | Kayamkulam               | 694,892   | 1/26/2020 | 51.1 (45.8, 51.3, 56.1)    | 49.3 (44.6, 49.0, 52.2)   | -1.8  | -1.4% (0.5%, -3.3%)         |
| 932 | India     | Dhulian                  | 393,496   | 1/26/2020 | 125.1 (82.6, 102.2, 143.1) | 120.6 (78.9, 99.4, 128.7) | -4.5  | -0.6% (2.6%, -3.7%)         |
| 933 | India     | Ottappalam               | 385,296   | 1/26/2020 | 55.7 (47.2, 54.2, 62.7)    | 53.7 (48.9, 53.6, 57.7)   | -2.1  | -0.1% (1.2%, -1.3%)         |
| 934 | India     | Hosur                    | 493,896   | 1/26/2020 | 60.7 (48.4, 57.7, 72.3)    | 60.1 (53.9, 59.2, 65.7)   | -0.6  | <b>-2.6% (-1.4%, -3.7%)</b> |
| 935 | Indonesia | Ambon                    | 513,458   | 1/18/2020 | 32.7 (30.3, 32.6, 35.3)    | 32.9 (30.0, 32.9, 36.3)   | 0.1   | 2.2% (5.2%, -0.7%)          |
| 936 | Indonesia | Balikpapan               | 682,065   | 1/18/2020 | 40.0 (35.6, 39.9, 44.4)    | 40.7 (35.7, 40.4, 44.8)   | 0.7   | 1.5% (5.0%, -1.9%)          |
| 937 | Indonesia | Bandar Lampung           | 1,091,512 | 1/18/2020 | 53.2 (46.4, 52.3, 59.6)    | 49.9 (42.0, 47.7, 56.1)   | -3.3  | -0.3% (5.4%, -5.7%)         |
| 938 | Indonesia | Bandung                  | 2,580,191 | 1/18/2020 | 84.7 (65.9, 81.7, 97.5)    | 68.8 (55.9, 65.5, 79.9)   | -15.9 | -0.6% (3.6%, -4.6%)         |
| 939 | Indonesia | Banjarmasin              | 732,005   | 1/18/2020 | 42.4 (36.9, 42.5, 47.6)    | 39.6 (35.0, 39.8, 43.6)   | -2.8  | 1.3% (6.9%, -4.1%)          |
| 940 | Indonesia | Bengkulu                 | 401,451   | 1/18/2020 | 40.8 (37.1, 41.0, 44.5)    | 40.0 (35.1, 39.9, 45.2)   | -0.8  | <b>-6.1% (-2.2%, -9.9%)</b> |
| 941 | Indonesia | Bogor                    | 1,159,719 | 1/18/2020 | 108.5 (78.5, 99.7, 128.7)  | 101.1 (71.0, 94.6, 123.9) | -7.4  | 5.2% (14.3%, -3.1%)         |

|     |           |                          |            |           |                             |                            |       |                             |
|-----|-----------|--------------------------|------------|-----------|-----------------------------|----------------------------|-------|-----------------------------|
| 942 | Indonesia | Cirebon                  | 320,129    | 1/18/2020 | 62.8 (54.6, 61.3, 68.2)     | 56.0 (47.7, 54.5, 61.5)    | -6.8  | <b>-4.7% (-3.5%, -6.0%)</b> |
| 943 | Indonesia | Jakarta                  | 10,770,487 | 1/18/2020 | 202.0 (122.6, 174.9, 245.3) | 135.7 (97.2, 128.7, 160.2) | -66.3 | -1.7% (9.2%, -11.5%)        |
| 944 | Indonesia | Jambi                    | 626,192    | 1/18/2020 | 46.7 (40.6, 46.7, 51.8)     | 43.3 (37.5, 43.3, 50.0)    | -3.4  | 4.7% (10.4%, -0.6%)         |
| 945 | Indonesia | Malang                   | 886,620    | 1/18/2020 | 59.4 (49.8, 58.1, 67.7)     | 54.8 (47.9, 54.3, 61.8)    | -4.7  | 1.3% (7.8%, -4.8%)          |
| 946 | Indonesia | Manado                   | 442,889    | 1/18/2020 | 37.3 (33.9, 37.6, 41.2)     | 37.1 (32.2, 36.8, 42.3)    | -0.2  | <b>5.9% (10.3%, 1.6%)</b>   |
| 947 | Indonesia | Medan                    | 2,337,958  | 1/18/2020 | 73.6 (58.7, 69.1, 83.3)     | 64.2 (53.1, 62.9, 73.0)    | -9.5  | -2.7% (4.4%, -9.3%)         |
| 948 | Indonesia | Padang                   | 980,455    | 1/18/2020 | 51.6 (44.2, 49.8, 58.3)     | 50.4 (42.1, 48.2, 56.8)    | -1.2  | 1.3% (6.4%, -3.6%)          |
| 949 | Indonesia | Palembang                | 1,722,700  | 1/18/2020 | 52.4 (43.9, 50.9, 58.5)     | 48.1 (39.7, 48.1, 56.8)    | -4.3  | -4.7% (0.9%, -9.9%)         |
| 950 | Indonesia | Pekalongan               | 313,275    | 1/18/2020 | 56.5 (50.5, 55.2, 60.2)     | 53.3 (46.3, 52.7, 58.8)    | -3.2  | 0.1% (5.3%, -4.9%)          |
| 951 | Indonesia | Pekan Baru               | 1,204,883  | 1/18/2020 | 50.4 (44.5, 48.9, 55.2)     | 48.4 (42.5, 48.0, 52.9)    | -2.0  | <b>-4.9% (-0.8%, -8.8%)</b> |
| 952 | Indonesia | Pontianak                | 667,910    | 1/18/2020 | 39.2 (35.6, 39.0, 43.0)     | 39.0 (34.7, 39.7, 42.9)    | -0.2  | 2.3% (5.1%, -0.5%)          |
| 953 | Indonesia | Samarinda                | 1,010,413  | 1/18/2020 | 41.7 (36.8, 41.6, 46.4)     | 39.5 (34.3, 39.1, 44.3)    | -2.2  | 3.2% (8.6%, -1.9%)          |
| 954 | Indonesia | Semarang                 | 1,866,492  | 1/18/2020 | 72.8 (62.0, 71.3, 83.0)     | 60.0 (52.8, 59.0, 66.8)    | -12.8 | 1.8% (6.9%, -3.1%)          |
| 955 | Indonesia | Sukabumi                 | 340,021    | 1/18/2020 | 62.8 (51.5, 60.3, 71.3)     | 60.1 (48.7, 57.1, 69.7)    | -2.7  | 3.1% (9.8%, -3.2%)          |
| 956 | Indonesia | Surabaya                 | 2,944,403  | 1/18/2020 | 74.6 (54.4, 63.2, 84.1)     | 73.2 (52.1, 63.1, 85.0)    | -1.3  | -5.6% (1.5%, -12.2%)        |
| 957 | Indonesia | Surakarta                | 527,279    | 1/18/2020 | 66.7 (54.9, 64.4, 75.5)     | 57.0 (48.8, 57.2, 64.8)    | -9.7  | 1.2% (7.1%, -4.4%)          |
| 958 | Indonesia | Makassar (Ujung Pandang) | 1,583,553  | 1/18/2020 | 47.1 (42.6, 47.7, 52.5)     | 44.0 (38.8, 44.5, 49.3)    | -3.0  | 3.3% (8.0%, -1.2%)          |
| 959 | Indonesia | Yogyakarta               | 439,829    | 1/18/2020 | 59.1 (51.4, 58.4, 65.7)     | 53.9 (47.9, 54.5, 60.6)    | -5.2  | 5.2% (11.0%, -0.2%)         |
| 960 | Indonesia | Batam                    | 1,546,064  | 1/18/2020 | 76.7 (56.8, 66.4, 85.4)     | 70.7 (55.9, 64.3, 76.1)    | -6.0  | 5.4% (13.8%, -2.3%)         |
| 961 | Indonesia | Denpasar                 | 986,853    | 1/18/2020 | 46.6 (41.7, 46.6, 51.3)     | 43.3 (38.6, 43.2, 47.4)    | -3.3  | 0.3% (5.8%, -5.0%)          |

|     |                            |              |           |           |                             |                             |        |                              |
|-----|----------------------------|--------------|-----------|-----------|-----------------------------|-----------------------------|--------|------------------------------|
| 962 | Indonesia                  | Tasikmalaya  | 1,056,485 | 1/18/2020 | 50.3 (44.5, 49.8, 55.0)     | 47.1 (41.4, 46.6, 52.3)     | -3.2   | -0.3% (3.9%, -4.2%)          |
| 963 | Indonesia                  | Mataram      | 505,024   | 1/18/2020 | 47.6 (40.6, 46.6, 53.4)     | 45.6 (40.0, 45.3, 51.2)     | -2.0   | -3.8% (1.2%, -8.6%)          |
| 964 | Indonesia                  | Jayapura     | 314,205   | 1/18/2020 | 35.4 (32.0, 35.8, 39.2)     | 36.8 (33.0, 36.9, 41.3)     | 1.4    | 1.9% (6.1%, -2.2%)           |
| 965 | Indonesia                  | Tangerang    | 2,338,547 | 1/18/2020 | 182.4 (126.1, 173.0, 226.1) | 138.2 (96.1, 133.5, 170.8)  | -44.3  | 1.4% (11.1%, -7.4%)          |
| 966 | Indonesia                  | Depok        | 2,727,209 | 1/18/2020 | 136.0 (90.8, 123.5, 164.1)  | 105.5 (81.4, 99.4, 128.9)   | -30.5  | 3.9% (14.3%, -5.6%)          |
| 967 | Indonesia                  | Bekasi       | 3,394,273 | 1/18/2020 | 163.9 (109.7, 140.5, 194.9) | 120.1 (90.3, 110.3, 135.9)  | -43.8  | <b>-5.5% (-3.4%, -7.6%)</b>  |
| 968 | Iran (Islamic Republic of) | Ahvaz        | 1,244,250 | 2/20/2020 | 117.1 (89.6, 104.3, 130.1)  | 105.3 (87.3, 99.0, 113.9)   | -11.8  | 0.7% (8.1%, -6.1%)           |
| 969 | Iran (Islamic Republic of) | Arak         | 551,006   | 2/20/2020 | 132.8 (88.8, 113.6, 153.8)  | 108.3 (79.3, 93.8, 126.2)   | -24.5  | -2.2% (1.8%, -6.0%)          |
| 970 | Iran (Islamic Republic of) | Ardabil      | 567,912   | 2/20/2020 | 87.8 (69.2, 81.8, 97.9)     | 80.0 (65.8, 78.8, 88.9)     | -7.9   | <b>-3.7% (-0.8%, -6.4%)</b>  |
| 971 | Iran (Islamic Republic of) | Bandar Abbas | 606,633   | 2/20/2020 | 104.1 (75.1, 88.5, 119.6)   | 89.9 (71.0, 82.7, 100.6)    | -14.2  | <b>-5.1% (-1.3%, -8.7%)</b>  |
| 972 | Iran (Islamic Republic of) | Esfahan      | 2,132,037 | 2/20/2020 | 257.3 (137.4, 205.1, 317.0) | 179.6 (110.2, 148.8, 229.4) | -77.7  | -7.3% (0.6%, -14.6%)         |
| 973 | Iran (Islamic Republic of) | Gorgan       | 367,950   | 2/20/2020 | 92.2 (75.0, 86.7, 101.2)    | 84.4 (71.3, 83.5, 92.6)     | -7.8   | -2.2% (0.6%, -4.9%)          |
| 974 | Iran (Islamic Republic of) | Hamadan      | 577,808   | 2/20/2020 | 114.8 (81.6, 99.7, 126.0)   | 89.5 (73.0, 83.4, 99.0)     | -25.3  | -2.2% (3.5%, -7.6%)          |
| 975 | Iran (Islamic Republic of) | Eslamshahr   | 498,261   | 2/20/2020 | 323.8 (171.7, 229.5, 390.5) | 204.3 (147.2, 178.6, 233.9) | -119.5 | 1.5% (9.4%, -5.8%)           |
| 976 | Iran (Islamic Republic of) | Karaj        | 1,580,413 | 2/20/2020 | 399.0 (198.6, 275.4, 448.7) | 272.0 (162.5, 213.1, 288.1) | -127.0 | 4.9% (17.8%, -6.6%)          |
| 977 | Iran (Islamic Republic of) | Kashan       | 328,630   | 2/20/2020 | 132.3 (93.1, 107.4, 150.1)  | 98.2 (82.9, 92.3, 105.2)    | -34.1  | 4.9% (10.5%, -0.3%)          |
| 978 | Iran (Islamic Republic of) | Kerman       | 541,485   | 2/20/2020 | 113.6 (75.8, 95.0, 133.1)   | 92.8 (73.3, 85.1, 105.0)    | -20.9  | <b>-9.5% (-1.0%, -17.2%)</b> |

|     |                            |             |           |           |                              |                             |        |                              |
|-----|----------------------------|-------------|-----------|-----------|------------------------------|-----------------------------|--------|------------------------------|
| 979 | Iran (Islamic Republic of) | Kermanshah  | 1,025,740 | 2/20/2020 | 89.4 (65.1, 81.8, 101.1)     | 84.5 (67.1, 78.3, 97.4)     | -4.9   | 0.6% (3.7%, -2.4%)           |
| 980 | Iran (Islamic Republic of) | Khorramabad | 394,028   | 2/20/2020 | 88.7 (69.8, 85.0, 100.0)     | 78.1 (66.6, 79.3, 87.8)     | -10.6  | -0.7% (2.3%, -3.6%)          |
| 981 | Iran (Islamic Republic of) | Mashhad     | 3,208,336 | 2/20/2020 | 210.4 (120.6, 179.1, 264.2)  | 160.2 (99.5, 127.4, 199.0)  | -50.2  | 3.7% (15.9%, -7.2%)          |
| 982 | Iran (Islamic Republic of) | Orumiyeh    | 793,044   | 2/20/2020 | 139.0 (89.9, 115.5, 154.4)   | 107.4 (80.2, 98.9, 122.1)   | -31.6  | -6.1% (1.6%, -13.3%)         |
| 983 | Iran (Islamic Republic of) | Qazvin      | 420,044   | 2/20/2020 | 169.1 (106.2, 132.5, 183.4)  | 120.5 (89.0, 108.9, 128.1)  | -48.6  | 3.5% (11.8%, -4.1%)          |
| 984 | Iran (Islamic Republic of) | Qom         | 1,287,937 | 2/20/2020 | 171.1 (106.5, 140.4, 202.5)  | 121.6 (92.1, 113.4, 136.4)  | -49.5  | 5.1% (12.3%, -1.7%)          |
| 985 | Iran (Islamic Republic of) | Rasht       | 712,715   | 2/20/2020 | 130.3 (82.8, 98.8, 149.1)    | 106.5 (81.8, 92.7, 111.4)   | -23.8  | -3.4% (1.3%, -7.9%)          |
| 986 | Iran (Islamic Republic of) | Sanandaj    | 444,840   | 2/20/2020 | 102.5 (73.4, 93.0, 121.8)    | 90.4 (67.5, 84.1, 101.1)    | -12.1  | <b>-5.3% (-2.6%, -7.9%)</b>  |
| 987 | Iran (Islamic Republic of) | Sari        | 320,829   | 2/20/2020 | 114.2 (84.7, 98.5, 129.0)    | 95.3 (77.3, 86.2, 98.9)     | -18.9  | <b>-4.2% (-0.6%, -7.6%)</b>  |
| 988 | Iran (Islamic Republic of) | Shiraz      | 1,651,362 | 2/20/2020 | 171.0 (92.8, 152.3, 225.9)   | 134.9 (79.9, 122.5, 176.7)  | -36.1  | <b>-5.3% (0.0%, -10.3%)</b>  |
| 989 | Iran (Islamic Republic of) | Tabriz      | 1,611,133 | 2/20/2020 | 176.9 (105.2, 141.8, 214.0)  | 129.9 (88.5, 107.7, 152.4)  | -47.1  | -9.4% (0.9%, -18.6%)         |
| 990 | Iran (Islamic Republic of) | Tehran      | 9,134,708 | 2/20/2020 | 908.4 (383.8, 576.3, 1168.9) | 508.0 (306.5, 412.9, 585.2) | -400.4 | -1.0% (12.8%, -13.1%)        |
| 991 | Iran (Islamic Republic of) | Yazd        | 565,449   | 2/20/2020 | 107.3 (80.5, 96.1, 120.2)    | 94.9 (80.6, 94.0, 105.1)    | -12.4  | -2.1% (3.7%, -7.6%)          |
| 992 | Iran (Islamic Republic of) | Zahedan     | 609,873   | 2/20/2020 | 75.3 (62.9, 73.2, 83.0)      | 74.4 (64.4, 73.2, 79.8)     | -0.9   | -1.6% (0.2%, -3.4%)          |
| 993 | Iran (Islamic Republic of) | Zanjan      | 467,460   | 2/20/2020 | 87.8 (68.8, 83.9, 100.2)     | 79.5 (66.6, 78.1, 89.2)     | -8.4   | <b>-7.1% (-3.8%, -10.4%)</b> |



|      |                            |             |           |           |                             |                             |        |                              |
|------|----------------------------|-------------|-----------|-----------|-----------------------------|-----------------------------|--------|------------------------------|
| 994  | Iran (Islamic Republic of) | Qods        | 331,071   | 2/20/2020 | 446.0 (216.4, 297.5, 479.5) | 277.7 (184.0, 231.4, 295.4) | -168.3 | 8.0% (21.8%, -4.2%)          |
| 995  | Iran (Islamic Republic of) | Shahriyar   | 363,622   | 2/20/2020 | 322.6 (169.3, 222.0, 353.8) | 203.7 (150.9, 174.9, 222.1) | -118.9 | 5.2% (13.9%, -2.8%)          |
| 996  | Iraq                       | Amara       | 655,663   | 2/20/2020 | 103.7 (79.7, 91.7, 113.1)   | 94.7 (80.3, 89.8, 104.6)    | -9.0   | <b>-3.1% (-0.1%, -5.9%)</b>  |
| 997  | Iraq                       | Erbil       | 846,374   | 2/20/2020 | 159.5 (108.1, 140.4, 193.8) | 136.4 (96.0, 121.7, 176.7)  | -23.1  | <b>-3.4% (-1.0%, -5.9%)</b>  |
| 998  | Iraq                       | Baghdad     | 7,144,260 | 2/20/2020 | 297.5 (200.7, 265.8, 357.6) | 259.5 (159.5, 218.5, 316.2) | -37.9  | <b>-9.5% (-5.3%, -13.6%)</b> |
| 999  | Iraq                       | Basra       | 1,352,210 | 2/20/2020 | 159.9 (108.0, 134.9, 182.1) | 145.3 (102.3, 128.1, 164.6) | -14.6  | <b>-1.9% (-0.3%, -3.5%)</b>  |
| 1000 | Iraq                       | Diwaniyah   | 513,369   | 2/20/2020 | 151.6 (107.7, 135.0, 166.5) | 128.0 (97.2, 115.7, 147.0)  | -23.6  | <b>-3.6% (-0.4%, -6.7%)</b>  |
| 1001 | Iraq                       | Hillah      | 604,149   | 2/20/2020 | 152.6 (116.6, 137.7, 173.3) | 140.8 (107.5, 129.9, 164.3) | -11.8  | <b>-6.8% (-3.7%, -9.8%)</b>  |
| 1002 | Iraq                       | Karbala     | 555,073   | 2/20/2020 | 144.6 (103.1, 124.7, 170.2) | 114.7 (89.7, 107.1, 132.6)  | -29.9  | <b>-3.8% (-0.3%, -7.2%)</b>  |
| 1003 | Iraq                       | Kirkuk      | 1,012,614 | 2/20/2020 | 114.3 (83.5, 110.1, 135.7)  | 102.9 (79.1, 101.5, 124.0)  | -11.4  | -2.9% (1.2%, -6.9%)          |
| 1004 | Iraq                       | Kut         | 471,238   | 2/20/2020 | 90.9 (74.1, 87.0, 101.0)    | 83.6 (72.9, 81.8, 92.6)     | -7.3   | <b>-3.0% (-0.6%, -5.3%)</b>  |
| 1005 | Iraq                       | Mosul       | 1,629,932 | 2/20/2020 | 120.5 (87.7, 106.1, 137.1)  | 108.6 (79.0, 97.4, 137.7)   | -11.9  | <b>-6.1% (-3.6%, -8.5%)</b>  |
| 1006 | Iraq                       | Najaf       | 873,744   | 2/20/2020 | 147.5 (96.5, 126.8, 181.1)  | 128.4 (87.5, 114.9, 150.4)  | -19.1  | <b>-5.0% (-2.6%, -7.4%)</b>  |
| 1007 | Iraq                       | Nasiriyah   | 616,994   | 2/20/2020 | 95.7 (78.4, 91.1, 107.8)    | 88.8 (76.0, 84.6, 97.3)     | -6.9   | -1.4% (1.1%, -3.7%)          |
| 1008 | Iraq                       | Ramadi      | 452,226   | 2/20/2020 | 85.6 (70.6, 83.3, 94.7)     | 82.1 (69.6, 79.1, 90.1)     | -3.5   | <b>-3.6% (-1.6%, -5.6%)</b>  |
| 1009 | Iraq                       | Sulaimaniya | 739,182   | 2/20/2020 | 104.9 (77.5, 100.4, 129.0)  | 95.6 (70.6, 87.6, 116.7)    | -9.3   | 0.0% (1.2%, -1.1%)           |
| 1010 | Iraq                       | Baaqoobah   | 323,796   | 2/20/2020 | 111.4 (89.8, 100.7, 113.4)  | 100.8 (82.5, 94.2, 110.0)   | -10.6  | <b>-5.0% (-2.9%, -7.2%)</b>  |
| 1011 | Iraq                       | Faloojah    | 346,522   | 2/20/2020 | 97.3 (77.2, 89.1, 103.2)    | 86.6 (74.1, 84.5, 97.4)     | -10.7  | <b>-5.9% (-3.9%, -7.8%)</b>  |
| 1012 | Iraq                       | Samarra     | 311,819   | 2/20/2020 | 90.7 (75.7, 85.3, 98.2)     | 84.5 (73.1, 82.4, 90.2)     | -6.2   | <b>-4.2% (-2.4%, -6.0%)</b>  |
| 1013 | Ireland                    | Dublin      | 1,228,179 | 3/12/2020 | 78.3 (54.4, 75.8, 93.4)     | 87.7 (72.5, 82.4, 99.1)     | 9.4    | -0.7% (4.4%, -5.6%)          |

|      |        |                    |           |           |                             |                             |       |                             |
|------|--------|--------------------|-----------|-----------|-----------------------------|-----------------------------|-------|-----------------------------|
| 1014 | Israel | Be'er Sheva        | 637,539   | 2/2/2020  | 88.8 (73.5, 84.4, 98.7)     | 83.5 (71.0, 81.1, 91.4)     | -5.3  | <b>-2.6% (-0.3%, -4.9%)</b> |
| 1015 | Israel | Haifa              | 1,147,431 | 2/2/2020  | 103.0 (77.1, 88.3, 114.5)   | 94.5 (74.8, 81.0, 100.7)    | -8.5  | <b>-3.1% (-0.4%, -5.7%)</b> |
| 1016 | Israel | Jerusalem          | 931,756   | 2/2/2020  | 111.5 (88.5, 104.6, 126.6)  | 100.5 (82.1, 94.8, 113.1)   | -11.1 | <b>-4.7% (-2.3%, -7.0%)</b> |
| 1017 | Israel | Tel Aviv-Jaffa     | 4,181,480 | 2/2/2020  | 114.0 (82.3, 96.6, 126.8)   | 101.8 (77.9, 88.5, 109.0)   | -12.2 | <b>-4.4% (-1.0%, -7.7%)</b> |
| 1018 | Italy  | Bari               | 622,377   | 1/23/2020 | 86.2 (73.8, 86.1, 96.2)     | 81.0 (70.6, 79.6, 87.3)     | -5.2  | <b>-1.2% (-0.1%, -2.3%)</b> |
| 1019 | Italy  | Bergamo            | 892,089   | 1/23/2020 | 195.5 (120.9, 159.2, 247.7) | 144.0 (98.2, 114.9, 152.3)  | -51.5 | -4.3% (0.4%, -8.8%)         |
| 1020 | Italy  | Bologna            | 805,986   | 1/23/2020 | 132.4 (99.0, 117.3, 147.8)  | 111.1 (84.6, 98.7, 118.7)   | -21.3 | 3.2% (7.4%, -0.9%)          |
| 1021 | Italy  | Brescia            | 483,865   | 1/23/2020 | 184.0 (120.2, 149.6, 224.6) | 137.2 (98.6, 114.8, 142.4)  | -46.8 | 0.4% (5.4%, -4.4%)          |
| 1022 | Italy  | Cagliari           | 476,265   | 1/23/2020 | 74.5 (63.1, 75.3, 84.0)     | 71.6 (62.5, 70.7, 78.8)     | -2.9  | -0.7% (0.3%, -1.7%)         |
| 1023 | Italy  | Catania            | 585,877   | 1/23/2020 | 83.7 (71.5, 83.7, 95.5)     | 78.8 (68.3, 79.3, 87.0)     | -4.9  | <b>-3.5% (-1.0%, -5.8%)</b> |
| 1024 | Italy  | Firenze (Florence) | 708,357   | 1/23/2020 | 100.2 (83.3, 94.5, 111.7)   | 86.9 (74.4, 85.8, 93.8)     | -13.4 | -1.5% (0.2%, -3.3%)         |
| 1025 | Italy  | Genova (Genoa)     | 679,613   | 1/23/2020 | 114.5 (88.5, 103.2, 125.5)  | 95.4 (80.6, 91.7, 103.2)    | -19.1 | -1.2% (1.1%, -3.4%)         |
| 1026 | Italy  | Latina             | 448,839   | 1/23/2020 | 84.1 (71.0, 83.3, 94.2)     | 77.1 (67.4, 76.3, 84.3)     | -7.0  | -1.6% (0.1%, -3.3%)         |
| 1027 | Italy  | Milano (Milan)     | 3,140,181 | 1/23/2020 | 237.1 (138.8, 197.7, 289.4) | 166.9 (103.9, 135.3, 178.4) | -70.3 | -3.1% (1.8%, -7.7%)         |
| 1028 | Italy  | Modena             | 355,774   | 1/23/2020 | 133.3 (96.7, 112.6, 142.4)  | 110.7 (85.3, 96.3, 113.7)   | -22.6 | 2.0% (6.3%, -2.2%)          |
| 1029 | Italy  | Napoli (Naples)    | 2,186,853 | 1/23/2020 | 115.1 (86.1, 105.2, 132.7)  | 96.7 (74.8, 90.7, 114.9)    | -18.5 | <b>-2.2% (-0.5%, -3.9%)</b> |
| 1030 | Italy  | Padova             | 683,604   | 1/23/2020 | 151.1 (107.4, 134.1, 166.8) | 121.9 (94.6, 106.2, 124.1)  | -29.2 | <b>-4.0% (-0.3%, -7.6%)</b> |
| 1031 | Italy  | Palermo            | 851,146   | 1/23/2020 | 79.1 (64.5, 79.1, 91.3)     | 77.6 (68.8, 77.0, 84.5)     | -1.4  | -2.4% (0.6%, -5.3%)         |
| 1032 | Italy  | Parma              | 328,154   | 1/23/2020 | 137.8 (99.1, 113.9, 150.5)  | 111.7 (83.9, 96.8, 114.8)   | -26.2 | -0.3% (4.4%, -4.7%)         |

|      |         |                |           |           |                             |                            |       |                               |
|------|---------|----------------|-----------|-----------|-----------------------------|----------------------------|-------|-------------------------------|
| 1033 | Italy   | Pescara        | 377,134   | 1/23/2020 | 82.2 (73.0, 81.3, 88.7)     | 75.8 (68.6, 74.7, 80.8)    | -6.4  | 1.7% (4.7%, -1.2%)            |
| 1034 | Italy   | Reggio Emilia  | 366,694   | 1/23/2020 | 133.9 (97.1, 112.3, 142.3)  | 108.9 (83.2, 95.6, 109.9)  | -25.1 | -4.1% (0.1%, -8.1%)           |
| 1035 | Italy   | Roma (Rome)    | 4,257,056 | 1/23/2020 | 111.7 (87.9, 105.6, 125.6)  | 98.4 (79.7, 90.5, 102.8)   | -13.3 | <b>-3.6% (-2.6%, -4.6%)</b>   |
| 1036 | Italy   | Salerno        | 419,469   | 1/23/2020 | 90.7 (75.2, 88.1, 103.2)    | 86.9 (72.9, 86.7, 94.8)    | -3.9  | -1.2% (0.6%, -3.1%)           |
| 1037 | Italy   | Taranto        | 460,246   | 1/23/2020 | 87.0 (71.1, 85.0, 99.9)     | 84.9 (72.5, 82.4, 95.2)    | -2.1  | -0.9% (0.9%, -2.7%)           |
| 1038 | Italy   | Torino (Turin) | 1,792,163 | 1/23/2020 | 165.3 (103.3, 128.8, 188.5) | 121.8 (85.1, 99.6, 122.8)  | -43.5 | -2.4% (2.5%, -7.1%)           |
| 1039 | Italy   | Venezia        | 637,245   | 1/23/2020 | 131.0 (94.9, 111.2, 144.1)  | 109.4 (82.3, 92.2, 115.8)  | -21.5 | 1.9% (6.9%, -2.8%)            |
| 1040 | Italy   | Verona         | 629,658   | 1/23/2020 | 170.6 (112.4, 137.8, 196.6) | 132.7 (95.6, 108.5, 129.6) | -37.9 | -2.3% (2.5%, -6.8%)           |
| 1041 | Italy   | Vicenza        | 326,371   | 1/23/2020 | 148.2 (106.4, 125.6, 171.2) | 119.5 (90.5, 106.3, 130.5) | -28.7 | -2.9% (1.1%, -6.7%)           |
| 1042 | Italy   | Busto Arsizio  | 654,258   | 1/23/2020 | 180.4 (115.0, 141.2, 220.2) | 133.0 (93.9, 109.1, 141.7) | -47.4 | -3.8% (1.2%, -8.5%)           |
| 1043 | Italy   | Como           | 480,879   | 1/23/2020 | 164.4 (108.0, 132.4, 187.9) | 124.0 (88.4, 100.9, 130.9) | -40.4 | <b>-6.2% (-1.6%, -10.6%)</b>  |
| 1044 | Italy   | Caserta        | 427,896   | 1/23/2020 | 104.3 (80.4, 95.7, 114.2)   | 92.0 (76.1, 86.7, 101.5)   | -12.3 | <b>-4.4% (-0.8%, -8.0%)</b>   |
| 1045 | Italy   | Barletta       | 340,980   | 1/23/2020 | 81.3 (71.9, 81.4, 90.5)     | 78.4 (69.5, 76.0, 84.9)    | -3.0  | <b>-1.3% (-0.3%, -2.4%)</b>   |
| 1046 | Italy   | Treviso        | 373,647   | 1/23/2020 | 124.4 (95.4, 113.9, 141.2)  | 105.9 (86.9, 97.2, 116.0)  | -18.5 | 0.0% (4.3%, -4.1%)            |
| 1047 | Italy   | Nola           | 325,360   | 1/23/2020 | 113.8 (84.4, 102.5, 131.8)  | 109.8 (77.4, 97.6, 122.0)  | -4.0  | <b>-6.6% (-2.4%, -10.6%)</b>  |
| 1048 | Italy   | Lecco          | 307,670   | 1/23/2020 | 133.8 (94.2, 113.7, 156.4)  | 108.0 (82.1, 92.4, 110.8)  | -25.9 | <b>-6.2% (-1.8%, -10.4%)</b>  |
| 1049 | Italy   | Seregno        | 619,871   | 1/23/2020 | 203.8 (124.4, 170.5, 253.8) | 147.3 (97.3, 120.7, 157.0) | -56.5 | -3.6% (1.5%, -8.4%)           |
| 1050 | Jamaica | Kingston       | 590,940   | 1/31/2020 | 82.7 (56.9, 71.0, 99.5)     | 70.9 (51.8, 63.1, 84.4)    | -11.9 | <b>-6.1% (-0.1%, -11.8%)</b>  |
| 1051 | Japan   | Akita          | 306,977   | 1/7/2020  | 70.7 (56.6, 69.5, 81.7)     | 69.8 (55.5, 69.2, 78.0)    | -0.9  | 1.2% (8.0%, -5.1%)            |
| 1052 | Japan   | Asahikawa      | 330,904   | 1/7/2020  | 77.3 (63.3, 73.9, 85.7)     | 79.5 (63.6, 74.7, 86.0)    | 2.2   | 8.7% (18.5%, -0.4%)           |
| 1053 | Japan   | Fukuyama       | 465,446   | 1/7/2020  | 116.5 (81.8, 105.6, 137.6)  | 103.7 (76.7, 92.4, 119.8)  | -12.8 | <b>-5.1% (-1.1%, -8.9%)</b>   |
| 1054 | Japan   | Iwaki          | 355,785   | 1/7/2020  | 85.4 (68.5, 81.4, 95.0)     | 83.7 (67.4, 80.8, 95.3)    | -1.8  | <b>-11.4% (-4.6%, -17.7%)</b> |
| 1055 | Japan   | Kagoshima      | 591,042   | 1/7/2020  | 76.1 (64.6, 72.7, 83.7)     | 76.1 (63.5, 73.4, 83.4)    | 0.0   | -5.1% (0.9%, -10.7%)          |

|      |       |            |            |          |                             |                             |       |                                |
|------|-------|------------|------------|----------|-----------------------------|-----------------------------|-------|--------------------------------|
| 1056 | Japan | Kanazawa   | 466,219    | 1/7/2020 | 80.2 (65.7, 76.7, 89.6)     | 74.8 (61.3, 73.8, 84.5)     | -5.4  | -4.0% (4.2%, -11.5%)           |
| 1057 | Japan | Kochi      | 329,672    | 1/7/2020 | 82.0 (69.1, 78.3, 91.1)     | 79.8 (67.8, 75.5, 89.2)     | -2.2  | <b>-9.7% (-3.2%, -15.8%)</b>   |
| 1058 | Japan | Koriyama   | 330,637    | 1/7/2020 | 83.9 (66.7, 79.6, 94.5)     | 79.4 (62.9, 74.5, 91.7)     | -4.4  | -7.0% (0.1%, -13.6%)           |
| 1059 | Japan | Kumamoto   | 742,612    | 1/7/2020 | 89.8 (74.8, 85.6, 97.8)     | 87.0 (73.0, 82.8, 96.3)     | -2.8  | <b>-7.8% (-0.5%, -14.6%)</b>   |
| 1060 | Japan | Kurashiki  | 475,975    | 1/7/2020 | 133.3 (87.0, 114.9, 157.9)  | 128.8 (83.6, 116.2, 151.7)  | -4.5  | <b>-12.9% (-0.6%, -23.6%)</b>  |
| 1061 | Japan | Kurume     | 304,865    | 1/7/2020 | 96.7 (79.9, 91.2, 105.4)    | 90.7 (74.1, 86.7, 100.6)    | -6.0  | <b>-10.6% (-3.3%, -17.4%)</b>  |
| 1062 | Japan | Maebashi   | 330,538    | 1/7/2020 | 97.4 (75.3, 90.6, 113.5)    | 93.8 (73.4, 88.6, 108.9)    | -3.6  | -7.0% (0.6%, -14.0%)           |
| 1063 | Japan | Matsuyama  | 509,958    | 1/7/2020 | 99.8 (79.6, 93.9, 111.2)    | 95.6 (74.7, 89.5, 105.7)    | -4.2  | <b>-8.6% (-3.0%, -13.8%)</b>   |
| 1064 | Japan | Miyazaki   | 399,446    | 1/7/2020 | 75.9 (64.6, 71.9, 83.3)     | 76.2 (63.8, 72.4, 83.6)     | 0.3   | <b>-6.5% (-1.0%, -11.7%)</b>   |
| 1065 | Japan | Nagano     | 371,971    | 1/7/2020 | 81.4 (66.4, 76.8, 91.0)     | 77.3 (62.2, 73.7, 84.7)     | -4.0  | -5.4% (1.8%, -12.1%)           |
| 1066 | Japan | Nagasaki   | 414,208    | 1/7/2020 | 83.4 (70.8, 80.2, 91.9)     | 80.4 (69.3, 77.7, 88.0)     | -3.1  | -3.8% (2.5%, -9.7%)            |
| 1067 | Japan | Naha       | 320,899    | 1/7/2020 | 65.2 (55.1, 63.3, 72.5)     | 64.5 (57.0, 63.1, 69.9)     | -0.7  | 0.4% (4.5%, -3.5%)             |
| 1068 | Japan | Niigata    | 804,298    | 1/7/2020 | 78.5 (61.1, 77.2, 89.4)     | 74.5 (57.7, 73.2, 85.1)     | -3.9  | -6.1% (2.2%, -13.7%)           |
| 1069 | Japan | Oita       | 479,259    | 1/7/2020 | 112.4 (82.6, 106.8, 131.8)  | 110.4 (86.2, 105.9, 131.7)  | -1.9  | <b>-8.1% (0.0%, -15.6%)</b>    |
| 1070 | Japan | Okayama    | 724,696    | 1/7/2020 | 120.7 (81.4, 102.3, 136.1)  | 119.4 (76.9, 104.2, 141.9)  | -1.3  | <b>-12.7% (-2.1%, -22.1%)</b>  |
| 1071 | Japan | Takamatsu  | 419,653    | 1/7/2020 | 114.0 (85.8, 102.3, 125.9)  | 103.5 (80.5, 94.9, 117.8)   | -10.5 | -7.4% (2.0%, -16.0%)           |
| 1072 | Japan | Takasaki   | 368,559    | 1/7/2020 | 103.6 (80.1, 94.9, 118.5)   | 99.3 (75.5, 92.0, 114.5)    | -4.3  | <b>-10.8% (-3.0%, -18.0%)</b>  |
| 1073 | Japan | Tokyo      | 37,393,129 | 1/7/2020 | 227.5 (126.9, 182.0, 274.7) | 212.3 (111.0, 183.3, 281.9) | -15.2 | <b>-24.1% (-12.8%, -34.0%)</b> |
| 1074 | Japan | Toyama     | 413,444    | 1/7/2020 | 87.3 (70.8, 83.2, 97.3)     | 83.9 (68.1, 80.1, 97.6)     | -3.4  | -1.9% (7.0%, -10.0%)           |
| 1075 | Japan | Toyohashi  | 371,026    | 1/7/2020 | 99.6 (79.0, 92.4, 113.5)    | 100.5 (80.9, 94.8, 114.1)   | 0.9   | -0.3% (7.5%, -7.5%)            |
| 1076 | Japan | Utsunomiya | 522,100    | 1/7/2020 | 103.8 (78.8, 95.4, 114.1)   | 100.7 (76.1, 94.1, 114.7)   | -3.1  | <b>-16.2% (-6.7%, -24.7%)</b>  |
| 1077 | Japan | Sapporo    | 2,669,680  | 1/7/2020 | 97.0 (70.1, 84.9, 106.2)    | 98.1 (72.1, 87.7, 106.6)    | 1.1   | 6.4% (19.6%, -5.4%)            |
| 1078 | Japan | Sendai     | 2,327,417  | 1/7/2020 | 89.9 (71.0, 85.2, 101.6)    | 83.4 (68.1, 81.6, 95.3)     | -6.5  | -7.3% (1.0%, -14.9%)           |

|      |            |                           |            |           |                             |                             |        |                              |
|------|------------|---------------------------|------------|-----------|-----------------------------|-----------------------------|--------|------------------------------|
| 1079 | Japan      | Chukyo M.M.A. (Nagoya)    | 9,552,132  | 1/7/2020  | 142.7 (94.4, 119.1, 163.8)  | 126.6 (91.7, 104.9, 146.7)  | -16.1  | -6.8% (5.2%, -17.5%)         |
| 1080 | Japan      | Hiroshima                 | 2,083,223  | 1/7/2020  | 109.8 (81.4, 102.4, 128.7)  | 100.2 (78.5, 88.9, 119.1)   | -9.6   | <b>-6.2% (-1.9%, -10.4%)</b> |
| 1081 | Japan      | Kitakyushu-Fukuoka M.M.A. | 5,528,632  | 1/7/2020  | 111.1 (83.7, 100.7, 123.5)  | 97.2 (76.1, 90.6, 112.2)    | -13.9  | -0.5% (2.6%, -3.5%)          |
| 1082 | Japan      | Shizuoka-Hamamatsu M.M.A. | 2,922,320  | 1/7/2020  | 92.6 (76.5, 89.0, 103.6)    | 90.5 (74.8, 84.7, 100.3)    | -2.1   | -1.5% (5.8%, -8.3%)          |
| 1083 | Japan      | Kinki M.M.A. (Osaka)      | 19,165,340 | 1/7/2020  | 175.9 (107.0, 149.1, 215.1) | 163.3 (101.9, 138.5, 203.0) | -12.6  | -5.7% (11.4%, -20.1%)        |
| 1084 | Jordan     | Amman                     | 2,148,293  | 3/15/2020 | 146.2 (94.8, 126.4, 171.3)  | 121.7 (81.5, 118.8, 147.7)  | -24.5  | <b>-3.5% (-0.9%, -6.1%)</b>  |
| 1085 | Jordan     | Irbid                     | 556,899    | 3/15/2020 | 97.7 (80.7, 94.5, 106.0)    | 87.4 (77.8, 87.8, 97.1)     | -10.4  | <b>-1.4% (0.0%, -2.9%)</b>   |
| 1086 | Jordan     | Ar-Rusayfah               | 523,543    | 3/15/2020 | 138.0 (91.6, 114.6, 151.9)  | 111.5 (81.8, 100.0, 129.2)  | -26.5  | <b>-3.7% (-1.4%, -5.9%)</b>  |
| 1087 | Jordan     | Zarqa                     | 729,220    | 3/15/2020 | 138.0 (91.6, 114.6, 151.9)  | 111.5 (81.8, 100.0, 129.2)  | -26.5  | <b>-3.7% (-1.4%, -5.9%)</b>  |
| 1088 | Jordan     | Al-Quwaysimah             | 385,288    | 3/15/2020 | 146.2 (94.8, 126.4, 171.3)  | 121.7 (81.5, 118.8, 147.7)  | -24.5  | <b>-3.5% (-0.9%, -6.1%)</b>  |
| 1089 | Jordan     | Tila al-Ali               | 327,476    | 3/15/2020 | 126.4 (88.9, 108.2, 142.0)  | 102.5 (79.6, 94.2, 111.2)   | -24.0  | <b>-4.0% (-2.8%, -5.3%)</b>  |
| 1090 | Kazakhstan | Astana                    | 1,165,983  | 3/12/2020 | 90.4 (63.6, 79.0, 103.0)    | 84.7 (66.9, 81.7, 93.9)     | -5.7   | <b>-2.0% (0.0%, -3.9%)</b>   |
| 1091 | Kazakhstan | Aktyubinsk                | 431,455    | 3/12/2020 | 72.5 (53.5, 69.3, 85.0)     | 73.2 (62.1, 70.8, 83.1)     | 0.7    | 2.6% (5.4%, -0.1%)           |
| 1092 | Kazakhstan | Almaty                    | 1,895,742  | 3/12/2020 | 229.7 (123.2, 175.8, 302.3) | 124.1 (85.4, 107.6, 151.9)  | -105.6 | -1.1% (4.2%, -6.2%)          |
| 1093 | Kazakhstan | Taraz                     | 366,386    | 3/12/2020 | 89.7 (73.6, 85.0, 96.8)     | 79.1 (70.1, 79.0, 86.4)     | -10.6  | -0.5% (0.5%, -1.5%)          |

|      |                                  |                         |           |           |                             |                             |       |                              |
|------|----------------------------------|-------------------------|-----------|-----------|-----------------------------|-----------------------------|-------|------------------------------|
| 1094 | Kazakhstan                       | Karaganda               | 504,946   | 3/12/2020 | 88.3 (63.4, 81.2, 101.5)    | 83.7 (69.2, 81.7, 93.8)     | -4.5  | -0.8% (3.1%, -4.5%)          |
| 1095 | Kazakhstan                       | Pavlodar                | 335,387   | 3/12/2020 | 132.5 (77.4, 98.2, 137.6)   | 110.8 (81.6, 96.9, 123.6)   | -21.7 | 3.0% (7.6%, -1.3%)           |
| 1096 | Kazakhstan                       | Semipalatinsk           | 321,351   | 3/12/2020 | 73.1 (60.2, 71.3, 82.3)     | 72.9 (64.4, 70.6, 80.2)     | -0.2  | 2.1% (4.4%, -0.1%)           |
| 1097 | Kazakhstan                       | Shimkent                | 1,057,936 | 3/12/2020 | 123.6 (84.3, 108.4, 148.2)  | 97.9 (80.3, 95.2, 108.6)    | -25.7 | -2.2% (0.9%, -5.3%)          |
| 1098 | Kazakhstan                       | Ust-Kamenogorsk         | 328,200   | 3/12/2020 | 90.8 (67.4, 81.8, 103.9)    | 88.9 (71.6, 83.8, 98.1)     | -1.9  | <b>2.8% (5.7%, 0.0%)</b>     |
| 1099 | Kenya                            | Eldoret                 | 394,023   | 1/20/2020 | 39.9 (35.7, 39.9, 44.7)     | 40.6 (34.6, 40.7, 46.1)     | 0.7   | <b>3.4% (5.6%, 1.3%)</b>     |
| 1100 | Kenya                            | Kisumu                  | 355,089   | 1/20/2020 | 45.1 (40.4, 45.9, 51.0)     | 44.7 (38.9, 45.1, 50.2)     | -0.4  | -0.7% (1.7%, -3.1%)          |
| 1101 | Kenya                            | Mombasa                 | 1,295,975 | 1/20/2020 | 40.9 (36.5, 40.5, 44.6)     | 40.8 (36.4, 40.6, 45.3)     | -0.1  | <b>-2.1% (-0.1%, -4.2%)</b>  |
| 1102 | Kenya                            | Nairobi                 | 4,734,881 | 1/20/2020 | 57.8 (48.2, 56.0, 64.5)     | 50.5 (43.5, 49.0, 57.0)     | -7.3  | -0.8% (2.0%, -3.5%)          |
| 1103 | Kenya                            | Nakuru                  | 383,461   | 1/20/2020 | 39.8 (34.7, 40.0, 44.6)     | 40.2 (34.1, 40.2, 46.1)     | 0.3   | 1.8% (4.8%, -1.2%)           |
| 1104 | Kenya                            | Ruiru                   | 389,022   | 1/20/2020 | 48.0 (40.6, 46.0, 52.7)     | 45.7 (39.4, 44.6, 51.1)     | -2.3  | <b>2.3% (4.2%, 0.4%)</b>     |
| 1105 | Kuwait                           | Al Kuwayt (Kuwait City) | 3,114,553 | 2/21/2020 | 209.8 (124.7, 163.3, 241.9) | 180.4 (112.7, 138.8, 205.7) | -29.3 | <b>-3.8% (-1.9%, -5.6%)</b>  |
| 1106 | Kyrgyzstan                       | Bishkek                 | 1,038,429 | 1/22/2020 | 127.3 (83.7, 101.8, 133.3)  | 106.7 (79.1, 90.2, 114.8)   | -20.6 | <b>-3.1% (0.0%, -6.1%)</b>   |
| 1107 | Lao People's Democratic Republic | Vientiane               | 682,542   | 3/11/2020 | 65.1 (56.3, 62.6, 71.7)     | 68.2 (60.4, 66.7, 76.7)     | 3.0   | <b>-2.3% (-0.5%, -4.2%)</b>  |
| 1108 | Latvia                           | Riga                    | 630,692   | 2/27/2020 | 80.2 (63.0, 76.1, 93.1)     | 78.7 (69.4, 77.7, 87.3)     | -1.6  | <b>-5.9% (-0.8%, -10.7%)</b> |
| 1109 | Lebanon                          | Bayrut (Beirut)         | 2,424,425 | 2/8/2020  | 167.6 (96.4, 129.6, 210.3)  | 139.4 (87.2, 117.3, 171.6)  | -28.2 | <b>-7.5% (-2.1%, -12.6%)</b> |
| 1110 | Liberia                          | Monrovia                | 1,517,235 | 3/10/2020 | 43.4 (39.4, 43.0, 47.3)     | 43.4 (40.7, 44.1, 48.2)     | 0.0   | -0.5% (1.5%, -2.5%)          |
| 1111 | Libya                            | Banghazi                | 823,974   | 2/10/2020 | 82.7 (63.5, 78.5, 98.6)     | 96.5 (73.7, 89.4, 106.7)    | 13.8  | 0.0% (2.4%, -2.5%)           |
| 1112 | Libya                            | Misratah                | 881,319   | 2/10/2020 | 80.9 (65.5, 76.6, 89.7)     | 81.7 (68.3, 77.3, 89.0)     | 0.9   | -2.0% (0.4%, -4.4%)          |

|      |            |                     |           |           |                            |                           |       |                              |
|------|------------|---------------------|-----------|-----------|----------------------------|---------------------------|-------|------------------------------|
| 1113 | Libya      | Tarabulus (Tripoli) | 1,165,085 | 2/10/2020 | 127.0 (84.9, 115.6, 148.0) | 110.4 (82.2, 99.2, 129.0) | -16.5 | -0.9% (2.9%, -4.5%)          |
| 1114 | Lithuania  | Vilnius             | 538,894   | 3/12/2020 | 81.9 (64.7, 77.7, 94.3)    | 78.1 (70.6, 77.9, 84.2)   | -3.8  | 0.7% (2.2%, -0.8%)           |
| 1115 | Madagascar | Antananarivo        | 3,368,585 | 3/15/2020 | 58.3 (45.7, 53.1, 65.0)    | 54.4 (44.5, 50.7, 57.4)   | -3.9  | <b>-2.1% (-0.7%, -3.6%)</b>  |
| 1116 | Madagascar | Antsirabe           | 355,832   | 3/15/2020 | 51.0 (43.4, 49.0, 57.2)    | 47.3 (42.8, 46.3, 51.3)   | -3.7  | -0.5% (0.5%, -1.5%)          |
| 1117 | Madagascar | Toamasina           | 434,398   | 3/15/2020 | 47.6 (41.6, 46.5, 52.5)    | 41.4 (37.6, 41.1, 44.7)   | -6.2  | -0.2% (0.6%, -1.0%)          |
| 1118 | Malawi     | Blantyre-Limbe      | 932,263   | 3/20/2020 | 53.5 (42.5, 48.7, 59.4)    | 48.0 (42.3, 47.7, 52.6)   | -5.6  | 0.4% (3.0%, -2.2%)           |
| 1119 | Malawi     | Lilongwe            | 1,121,720 | 3/20/2020 | 49.9 (41.0, 46.4, 56.3)    | 47.4 (41.3, 46.4, 53.0)   | -2.5  | -1.0% (2.9%, -4.8%)          |
| 1120 | Malaysia   | Alor Star           | 341,779   | 1/30/2020 | 50.7 (42.9, 50.0, 56.5)    | 51.3 (45.5, 51.3, 57.6)   | 0.6   | 1.3% (3.5%, -0.9%)           |
| 1121 | Malaysia   | Ipoh                | 813,553   | 1/30/2020 | 69.3 (55.9, 66.7, 79.8)    | 61.9 (48.9, 60.2, 71.3)   | -7.4  | <b>-7.8% (-4.7%, -10.8%)</b> |
| 1122 | Malaysia   | Johor Bahru         | 1,023,900 | 1/30/2020 | 137.1 (75.3, 119.6, 160.7) | 104.5 (64.4, 92.1, 138.1) | -32.6 | -5.8% (0.3%, -11.6%)         |
| 1123 | Malaysia   | Kota Bharu          | 347,673   | 1/30/2020 | 45.9 (39.1, 44.5, 52.0)    | 44.3 (38.1, 43.5, 50.8)   | -1.6  | -1.6% (1.7%, -4.8%)          |
| 1124 | Malaysia   | Kota Kinabalu       | 549,586   | 1/30/2020 | 46.8 (40.8, 48.2, 53.2)    | 46.8 (42.4, 48.4, 53.3)   | 0.0   | <b>-2.1% (-0.5%, -3.7%)</b>  |
| 1125 | Malaysia   | Kuala Terengganu    | 384,369   | 1/30/2020 | 43.7 (37.6, 41.5, 49.4)    | 42.8 (36.7, 42.2, 47.8)   | -0.9  | -0.7% (1.7%, -3.1%)          |
| 1126 | Malaysia   | Kuantan             | 502,866   | 1/30/2020 | 49.5 (42.7, 48.2, 55.9)    | 45.0 (39.2, 45.1, 50.4)   | -4.5  | -0.4% (1.4%, -2.1%)          |
| 1127 | Malaysia   | Seremban            | 474,691   | 1/30/2020 | 69.0 (54.9, 63.5, 77.4)    | 60.9 (48.4, 56.6, 69.9)   | -8.1  | <b>-4.0% (-1.0%, -7.0%)</b>  |
| 1128 | Malaysia   | Kuala Lumpur        | 7,996,830 | 1/30/2020 | 123.6 (90.6, 118.4, 145.6) | 104.2 (71.5, 94.0, 124.1) | -19.4 | <b>-7.8% (-3.5%, -11.9%)</b> |
| 1129 | Malaysia   | Kuching             | 611,566   | 1/30/2020 | 44.3 (37.9, 44.6, 50.1)    | 42.1 (35.5, 42.1, 48.4)   | -2.2  | 1.0% (4.0%, -2.0%)           |
| 1130 | Malaysia   | Sandakan            | 375,248   | 1/30/2020 | 40.5 (36.4, 40.5, 44.8)    | 41.0 (35.2, 40.6, 45.9)   | 0.5   | <b>2.3% (4.1%, 0.5%)</b>     |

|      |            |                   |           |           |                           |                          |      |                             |
|------|------------|-------------------|-----------|-----------|---------------------------|--------------------------|------|-----------------------------|
| 1131 | Mali       | Bamako            | 2,617,686 | 3/19/2020 | 68.7 (57.5, 67.5, 77.5)   | 66.9 (54.8, 64.8, 76.2)  | -1.8 | -0.2% (1.8%, -2.2%)         |
| 1132 | Mali       | Sikasso           | 386,262   | 3/19/2020 | 47.3 (42.4, 47.4, 52.1)   | 50.5 (46.9, 50.5, 54.7)  | 3.3  | -0.1% (1.4%, -1.5%)         |
| 1133 | Mauritania | Nouakchott        | 1,314,636 | 2/5/2020  | 55.0 (48.4, 55.1, 61.6)   | 55.4 (49.2, 56.0, 60.7)  | 0.3  | -0.7% (0.8%, -2.1%)         |
| 1134 | Mexico     | Acapulco de Ju?ez | 979,381   | 2/28/2020 | 55.2 (47.3, 55.9, 62.3)   | 56.3 (51.6, 55.8, 61.3)  | 1.1  | -0.2% (1.2%, -1.6%)         |
| 1135 | Mexico     | Aguascalientes    | 1,106,453 | 2/28/2020 | 72.5 (60.1, 71.4, 83.8)   | 73.5 (65.6, 74.4, 81.6)  | 1.1  | -1.5% (0.8%, -3.7%)         |
| 1136 | Mexico     | Canc?             | 943,922   | 2/28/2020 | 54.9 (45.8, 55.1, 62.8)   | 53.5 (48.9, 54.2, 57.4)  | -1.5 | <b>-1.7% (-0.1%, -3.2%)</b> |
| 1137 | Mexico     | Celaya            | 680,971   | 2/28/2020 | 82.2 (68.7, 81.6, 92.4)   | 82.0 (74.8, 81.9, 88.9)  | -0.3 | -1.3% (0.6%, -3.2%)         |
| 1138 | Mexico     | Chihuahua         | 1,054,766 | 2/28/2020 | 78.8 (65.5, 77.5, 89.9)   | 78.0 (63.3, 78.4, 90.6)  | -0.8 | -0.6% (2.2%, -3.4%)         |
| 1139 | Mexico     | Ciudad Ju?ez      | 1,519,214 | 2/28/2020 | 104.5 (74.6, 93.1, 121.9) | 98.1 (78.3, 95.5, 113.7) | -6.4 | <b>-2.1% (0.0%, -4.1%)</b>  |
| 1140 | Mexico     | Ciudad Obreg?     | 372,416   | 2/28/2020 | 67.1 (59.8, 67.6, 74.4)   | 67.0 (61.4, 67.4, 72.8)  | -0.2 | 1.3% (2.8%, -0.2%)          |
| 1141 | Mexico     | Ciudad Victoria   | 362,348   | 2/28/2020 | 64.7 (56.8, 63.8, 71.7)   | 62.2 (57.9, 63.1, 68.2)  | -2.5 | -0.8% (0.9%, -2.4%)         |
| 1142 | Mexico     | Coatzacoalcos     | 395,130   | 2/28/2020 | 62.3 (49.7, 60.8, 72.1)   | 63.8 (55.9, 62.3, 69.9)  | 1.4  | -1.2% (0.8%, -3.1%)         |
| 1143 | Mexico     | Colima            | 409,948   | 2/28/2020 | 62.8 (54.5, 62.0, 71.7)   | 65.5 (58.2, 64.6, 71.6)  | 2.7  | <b>-2.5% (-1.0%, -4.0%)</b> |
| 1144 | Mexico     | C?doba            | 352,346   | 2/28/2020 | 66.8 (54.2, 63.9, 76.3)   | 64.3 (56.4, 62.3, 70.2)  | -2.5 | 0.5% (2.5%, -1.5%)          |
| 1145 | Mexico     | Cuautla Morelos   | 516,755   | 2/28/2020 | 84.9 (69.9, 80.2, 95.2)   | 88.2 (76.4, 86.0, 96.1)  | 3.3  | <b>-4.6% (-2.0%, -7.1%)</b> |
| 1146 | Mexico     | Cuernavaca        | 1,075,022 | 2/28/2020 | 98.0 (75.6, 91.3, 112.4)  | 94.3 (78.9, 89.9, 108.8) | -3.6 | <b>-3.3% (-0.2%, -6.3%)</b> |
| 1147 | Mexico     | Culiac?           | 839,054   | 2/28/2020 | 76.1 (64.0, 76.2, 87.9)   | 74.4 (66.6, 75.1, 83.8)  | -1.7 | -0.5% (1.7%, -2.6%)         |
| 1148 | Mexico     | Durango           | 630,982   | 2/28/2020 | 65.3 (53.8, 64.8, 75.4)   | 63.8 (55.1, 64.3, 71.1)  | -1.5 | 0.1% (1.4%, -1.3%)          |
| 1149 | Mexico     | Ensenada          | 334,989   | 2/28/2020 | 76.8 (66.4, 75.3, 85.3)   | 73.7 (66.0, 72.4, 79.9)  | -3.1 | <b>2.6% (5.0%, 0.4%)</b>    |



|      |        |                               |            |           |                             |                             |       |                              |
|------|--------|-------------------------------|------------|-----------|-----------------------------|-----------------------------|-------|------------------------------|
| 1150 | Mexico | Guadalajara                   | 5,179,479  | 2/28/2020 | 126.4 (88.0, 113.4, 147.0)  | 113.6 (92.8, 108.9, 131.7)  | -12.8 | 0.4% (4.0%, -3.1%)           |
| 1151 | Mexico | Hermosillo                    | 867,885    | 2/28/2020 | 79.7 (66.2, 78.6, 89.1)     | 76.3 (68.6, 74.2, 83.3)     | -3.4  | -0.2% (1.8%, -2.3%)          |
| 1152 | Mexico | Irapuato                      | 452,605    | 2/28/2020 | 74.4 (62.8, 73.4, 84.2)     | 76.7 (68.4, 77.6, 85.0)     | 2.3   | -1.5% (0.5%, -3.5%)          |
| 1153 | Mexico | Le? de los Aldamas            | 1,825,080  | 2/28/2020 | 81.5 (66.1, 79.9, 96.5)     | 80.2 (67.3, 80.0, 93.7)     | -1.3  | <b>-2.0% (-0.1%, -3.8%)</b>  |
| 1154 | Mexico | Los Mochis                    | 313,492    | 2/28/2020 | 63.7 (56.2, 63.7, 70.6)     | 62.1 (57.2, 63.5, 67.9)     | -1.6  | -1.1% (0.3%, -2.5%)          |
| 1155 | Mexico | Matamoros                     | 562,755    | 2/28/2020 | 71.5 (61.8, 71.1, 81.4)     | 74.2 (68.9, 75.5, 82.1)     | 2.6   | <b>1.3% (2.5%, 0.1%)</b>     |
| 1156 | Mexico | Mazatl?                       | 454,733    | 2/28/2020 | 60.4 (53.5, 60.6, 67.6)     | 58.7 (54.4, 59.2, 63.6)     | -1.7  | -0.2% (1.4%, -1.8%)          |
| 1157 | Mexico | M?ida                         | 1,161,475  | 2/28/2020 | 57.5 (47.9, 57.4, 65.5)     | 61.7 (56.6, 60.2, 65.0)     | 4.2   | -1.0% (0.5%, -2.4%)          |
| 1158 | Mexico | Mexicali                      | 1,120,872  | 2/28/2020 | 107.4 (82.0, 98.9, 128.7)   | 105.5 (89.7, 102.8, 119.9)  | -1.9  | 2.2% (5.5%, -1.0%)           |
| 1159 | Mexico | Ciudad de M?ico (Mexico City) | 21,782,378 | 2/28/2020 | 291.9 (178.2, 248.4, 365.3) | 206.7 (145.7, 175.7, 233.1) | -85.2 | <b>-6.7% (-3.0%, -10.3%)</b> |
| 1160 | Mexico | Monclova                      | 360,876    | 2/28/2020 | 73.5 (61.0, 69.0, 80.7)     | 68.4 (62.4, 68.1, 73.4)     | -5.1  | <b>2.0% (4.0%, 0.0%)</b>     |
| 1161 | Mexico | Monterrey                     | 4,874,095  | 2/28/2020 | 171.5 (89.7, 133.6, 210.0)  | 111.1 (74.4, 94.2, 117.9)   | -60.4 | -1.1% (2.8%, -4.9%)          |
| 1162 | Mexico | Morelia                       | 948,793    | 2/28/2020 | 68.0 (55.8, 67.4, 77.8)     | 68.1 (59.9, 69.2, 75.7)     | 0.2   | -2.0% (0.3%, -4.2%)          |
| 1163 | Mexico | Nuevo Laredo                  | 446,724    | 2/28/2020 | 72.9 (61.3, 69.1, 79.2)     | 68.7 (63.2, 68.0, 73.9)     | -4.2  | 1.2% (3.2%, -0.7%)           |
| 1164 | Mexico | Oaxaca de Ju?ez               | 704,559    | 2/28/2020 | 56.0 (48.2, 55.2, 63.9)     | 56.5 (52.3, 56.5, 62.3)     | 0.5   | <b>-3.0% (-1.1%, -5.0%)</b>  |
| 1165 | Mexico | Orizaba                       | 475,360    | 2/28/2020 | 64.5 (53.3, 63.1, 73.5)     | 63.4 (55.7, 61.4, 70.7)     | -1.2  | -1.9% (0.3%, -4.0%)          |
| 1166 | Mexico | Pachuca de Soto               | 633,453    | 2/28/2020 | 86.2 (67.9, 80.9, 98.0)     | 77.2 (67.7, 75.7, 86.3)     | -8.9  | -1.2% (0.8%, -3.2%)          |

|      |        |                      |           |           |                            |                           |       |                             |
|------|--------|----------------------|-----------|-----------|----------------------------|---------------------------|-------|-----------------------------|
| 1167 | Mexico | Poza Rica de Hidalgo | 564,578   | 2/28/2020 | 67.4 (58.5, 65.9, 75.7)    | 65.5 (58.2, 64.3, 69.6)   | -1.9  | 1.4% (3.5%, -0.6%)          |
| 1168 | Mexico | Puebla               | 3,194,848 | 2/28/2020 | 84.6 (65.2, 79.7, 97.3)    | 85.7 (69.8, 81.1, 98.8)   | 1.1   | <b>-2.4% (-0.4%, -4.3%)</b> |
| 1169 | Mexico | Quer?aro             | 1,339,103 | 2/28/2020 | 94.5 (74.9, 90.5, 107.4)   | 90.3 (76.2, 87.8, 100.0)  | -4.3  | -1.5% (1.0%, -3.9%)         |
| 1170 | Mexico | Reynosa              | 899,084   | 2/28/2020 | 72.5 (63.2, 71.7, 79.8)    | 70.7 (64.7, 70.3, 77.3)   | -1.8  | 0.7% (2.0%, -0.7%)          |
| 1171 | Mexico | Saltillo             | 983,784   | 2/28/2020 | 93.9 (70.1, 84.1, 103.1)   | 77.4 (64.7, 74.6, 89.6)   | -16.5 | -1.3% (0.7%, -3.3%)         |
| 1172 | Mexico | San Luis Potosí      | 1,216,564 | 2/28/2020 | 81.9 (62.8, 75.0, 93.4)    | 77.7 (64.3, 74.2, 86.9)   | -4.2  | <b>-3.4% (-1.5%, -5.3%)</b> |
| 1173 | Mexico | Tampico              | 1,001,278 | 2/28/2020 | 68.2 (58.7, 67.1, 76.0)    | 65.2 (59.0, 65.2, 70.0)   | -3.0  | 0.9% (2.7%, -0.9%)          |
| 1174 | Mexico | Tehuac?              | 341,956   | 2/28/2020 | 59.4 (50.7, 58.8, 67.5)    | 63.5 (58.2, 62.9, 68.6)   | 4.1   | <b>-2.4% (-0.6%, -4.1%)</b> |
| 1175 | Mexico | Tepic                | 545,941   | 2/28/2020 | 60.5 (51.1, 60.7, 69.7)    | 63.1 (56.8, 63.4, 68.5)   | 2.6   | -0.6% (1.5%, -2.6%)         |
| 1176 | Mexico | Tijuana              | 2,140,398 | 2/28/2020 | 121.8 (86.2, 104.6, 141.9) | 92.8 (79.7, 90.3, 101.8)  | -29.0 | <b>3.9% (7.7%, 0.2%)</b>    |
| 1177 | Mexico | Toluca de Lerdo      | 2,467,241 | 2/28/2020 | 106.5 (76.3, 96.4, 125.4)  | 92.1 (75.5, 87.9, 103.6)  | -14.4 | -2.5% (0.9%, -5.7%)         |
| 1178 | Mexico | Tuxtla Gutierrez     | 847,924   | 2/28/2020 | 60.4 (49.6, 59.7, 69.2)    | 63.8 (56.2, 62.3, 69.2)   | 3.4   | -0.1% (1.6%, -1.8%)         |
| 1179 | Mexico | Uruap?               | 329,996   | 2/28/2020 | 53.2 (45.3, 53.3, 61.0)    | 55.5 (50.2, 55.6, 61.0)   | 2.2   | -1.4% (0.5%, -3.4%)         |
| 1180 | Mexico | Veracruz             | 918,529   | 2/28/2020 | 67.4 (56.5, 66.0, 76.3)    | 67.6 (60.4, 65.2, 73.5)   | 0.2   | -1.4% (0.4%, -3.1%)         |
| 1181 | Mexico | Villahermosa         | 898,461   | 2/28/2020 | 61.9 (49.1, 60.5, 72.5)    | 64.8 (57.0, 63.9, 69.7)   | 2.9   | -0.5% (1.1%, -2.1%)         |
| 1182 | Mexico | Xalapa               | 775,620   | 2/28/2020 | 62.4 (52.9, 60.4, 69.5)    | 61.1 (55.8, 60.0, 66.1)   | -1.3  | -0.7% (1.6%, -3.1%)         |
| 1183 | Mexico | Zacatecas            | 368,616   | 2/28/2020 | 59.3 (51.3, 59.2, 67.0)    | 60.5 (55.1, 61.7, 66.1)   | 1.3   | <b>-2.4% (-0.7%, -4.0%)</b> |
| 1184 | Mexico | Puerto Vallarta      | 515,910   | 2/28/2020 | 54.2 (45.8, 55.0, 62.2)    | 54.7 (49.1, 53.2, 59.4)   | 0.4   | <b>-1.8% (0.0%, -3.6%)</b>  |
| 1185 | Mexico | Tlaxcala             | 596,362   | 2/28/2020 | 81.2 (67.2, 78.1, 92.1)    | 78.0 (68.4, 77.8, 86.2)   | -3.2  | <b>-3.1% (-0.3%, -5.8%)</b> |
| 1186 | Mexico | Minatitl?            | 401,020   | 2/28/2020 | 63.2 (51.6, 62.9, 72.7)    | 67.3 (61.5, 66.4, 72.5)   | 4.2   | <b>-1.9% (-0.1%, -3.5%)</b> |
| 1187 | Mexico | La Laguna            | 1,614,854 | 2/28/2020 | 104.6 (81.8, 100.4, 122.5) | 100.5 (87.0, 99.0, 116.7) | -4.1  | 0.0% (1.8%, -1.8%)          |

|      |            |                           |           |           |                            |                           |       |                              |
|------|------------|---------------------------|-----------|-----------|----------------------------|---------------------------|-------|------------------------------|
| 1188 | Mongolia   | Ulaanbaatar               | 1,584,358 | 1/27/2020 | 119.5 (73.6, 92.7, 141.0)  | 103.1 (70.9, 83.5, 116.5) | -16.4 | <b>-7.0% (-1.5%, -12.1%)</b> |
| 1189 | Morocco    | Agadir                    | 923,552   | 3/13/2020 | 71.0 (63.5, 69.8, 77.1)    | 68.6 (64.3, 69.2, 73.0)   | -2.4  | 0.8% (2.5%, -0.8%)           |
| 1190 | Morocco    | Dar-el-Beida (Casablanca) | 3,752,357 | 3/13/2020 | 125.0 (87.6, 103.0, 137.2) | 88.8 (80.3, 86.5, 95.4)   | -36.2 | 0.2% (2.7%, -2.2%)           |
| 1191 | Morocco    | F?                        | 1,224,080 | 3/13/2020 | 75.1 (64.7, 75.4, 84.6)    | 73.7 (66.6, 73.3, 80.9)   | -1.4  | -0.5% (1.0%, -2.0%)          |
| 1192 | Morocco    | K?itra                    | 480,038   | 3/13/2020 | 73.0 (63.8, 72.7, 80.6)    | 71.7 (67.7, 71.7, 76.5)   | -1.3  | 0.8% (2.2%, -0.6%)           |
| 1193 | Morocco    | Marrakech                 | 1,002,709 | 3/13/2020 | 75.3 (66.5, 75.7, 83.8)    | 73.9 (67.9, 75.2, 80.8)   | -1.4  | -0.9% (0.3%, -2.1%)          |
| 1194 | Morocco    | Mekn?                     | 553,755   | 3/13/2020 | 72.0 (63.8, 72.6, 80.7)    | 72.0 (65.1, 73.0, 79.9)   | 0.1   | 0.2% (1.7%, -1.3%)           |
| 1195 | Morocco    | Oujda                     | 558,524   | 3/13/2020 | 68.0 (58.6, 68.0, 77.5)    | 71.5 (65.3, 72.7, 78.9)   | 3.5   | 0.4% (1.7%, -0.8%)           |
| 1196 | Morocco    | Rabat                     | 1,884,802 | 3/13/2020 | 83.3 (70.4, 79.7, 91.6)    | 73.3 (68.9, 73.9, 78.2)   | -10.0 | <b>2.9% (4.9%, 0.9%)</b>     |
| 1197 | Morocco    | Safi                      | 323,906   | 3/13/2020 | 68.4 (59.0, 68.9, 76.6)    | 68.8 (64.0, 68.4, 74.6)   | 0.4   | -1.0% (0.2%, -2.3%)          |
| 1198 | Morocco    | Tanger                    | 1,197,923 | 3/13/2020 | 87.6 (71.7, 84.3, 96.1)    | 82.2 (72.2, 79.3, 88.5)   | -5.4  | -0.6% (0.4%, -1.6%)          |
| 1199 | Morocco    | T?ouan                    | 421,247   | 3/13/2020 | 71.3 (58.6, 69.6, 80.9)    | 72.1 (65.1, 71.4, 77.5)   | 0.8   | 0.3% (1.5%, -0.9%)           |
| 1200 | Mozambique | Beira                     | 569,911   | 2/11/2020 | 54.5 (45.3, 51.2, 61.5)    | 47.5 (43.3, 46.6, 51.1)   | -7.0  | -0.4% (1.6%, -2.4%)          |
| 1201 | Mozambique | Chimoio                   | 425,069   | 2/11/2020 | 55.2 (42.8, 49.2, 61.4)    | 45.2 (41.0, 43.9, 48.1)   | -10.0 | <b>-2.7% (-0.8%, -4.7%)</b>  |
| 1202 | Mozambique | Maputo                    | 1,110,477 | 2/11/2020 | 75.2 (56.1, 65.6, 79.2)    | 68.9 (53.1, 60.9, 69.5)   | -6.2  | -1.1% (2.9%, -4.8%)          |
| 1203 | Mozambique | Matola                    | 1,705,886 | 2/11/2020 | 78.1 (57.8, 68.1, 82.3)    | 69.7 (54.3, 62.3, 72.3)   | -8.4  | -1.4% (2.1%, -4.7%)          |
| 1204 | Mozambique | Nampula                   | 848,096   | 2/11/2020 | 49.3 (39.9, 44.2, 53.7)    | 42.6 (39.0, 42.1, 45.6)   | -6.7  | 1.1% (3.4%, -1.2%)           |
| 1205 | Mozambique | Quelimane                 | 414,813   | 2/11/2020 | 50.1 (41.0, 46.0, 55.0)    | 43.1 (39.0, 42.9, 46.3)   | -7.0  | 0.0% (2.0%, -1.9%)           |
| 1206 | Mozambique | Tete                      | 370,650   | 2/11/2020 | 55.8 (44.0, 50.7, 63.6)    | 47.0 (42.0, 46.0, 51.2)   | -8.9  | -0.4% (1.6%, -2.2%)          |
| 1207 | Myanmar    | Mandalay                  | 1,437,554 | 2/1/2020  | 70.4 (56.6, 65.4, 80.7)    | 75.4 (65.5, 73.8, 83.5)   | 5.0   | <b>-2.6% (-0.3%, -4.8%)</b>  |
| 1208 | Myanmar    | Yangon                    | 5,331,800 | 2/1/2020  | 89.7 (60.5, 81.4, 106.1)   | 84.6 (59.2, 80.4, 100.2)  | -5.1  | -2.4% (1.9%, -6.6%)          |
| 1209 | Myanmar    | Nay Pyi Taw               | 593,596   | 2/1/2020  | 58.1 (48.6, 54.0, 65.6)    | 63.0 (53.2, 61.2, 70.4)   | 4.9   | <b>-4.5% (-2.5%, -6.5%)</b>  |

|      |             |                          |           |           |                            |                            |       |                             |
|------|-------------|--------------------------|-----------|-----------|----------------------------|----------------------------|-------|-----------------------------|
| 1210 | Namibia     | Windhoek                 | 431,171   | 3/1/2020  | 58.7 (51.9, 58.1, 65.0)    | 51.4 (46.0, 50.3, 55.7)    | -7.3  | -0.8% (1.3%, -3.0%)         |
| 1211 | Nepal       | Kathmandu                | 1,423,515 | 1/25/2020 | 80.2 (67.3, 77.5, 90.4)    | 73.0 (62.8, 69.6, 79.0)    | -7.2  | 0.0% (2.1%, -2.1%)          |
| 1212 | Nepal       | Pokhara                  | 420,735   | 1/25/2020 | 60.4 (52.0, 58.9, 67.6)    | 60.6 (53.8, 60.1, 66.3)    | 0.2   | 0.7% (2.1%, -0.6%)          |
| 1213 | Netherlands | Amsterdam                | 1,148,972 | 3/6/2020  | 138.4 (89.9, 116.4, 161.9) | 111.4 (83.1, 98.3, 125.9)  | -27.0 | 1.4% (9.4%, -6.0%)          |
| 1214 | Netherlands | Eindhoven                | 358,966   | 3/6/2020  | 133.3 (95.3, 121.1, 152.5) | 116.0 (92.1, 108.5, 128.5) | -17.3 | -1.1% (3.6%, -5.5%)         |
| 1215 | Netherlands | Rotterdam                | 1,010,026 | 3/6/2020  | 143.1 (97.3, 126.1, 170.5) | 132.8 (98.3, 115.9, 148.7) | -10.4 | 1.2% (8.3%, -5.3%)          |
| 1216 | Netherlands | Utrecht                  | 544,389   | 3/6/2020  | 132.1 (94.9, 117.9, 142.5) | 107.1 (87.8, 100.6, 121.9) | -24.9 | -4.7% (2.3%, -11.1%)        |
| 1217 | Netherlands | s-Gravenhage (The Hague) | 697,564   | 3/6/2020  | 137.6 (89.7, 120.0, 173.7) | 121.2 (88.0, 104.6, 137.6) | -16.4 | -3.1% (4.5%, -10.1%)        |
| 1218 | New Zealand | Auckland                 | 1,606,564 | 2/2/2020  | 67.4 (56.3, 64.9, 74.2)    | 63.8 (51.2, 60.7, 74.1)    | -3.6  | <b>-2.8% (-1.3%, -4.3%)</b> |
| 1219 | New Zealand | Christchurch             | 398,520   | 2/2/2020  | 64.6 (56.2, 65.2, 72.6)    | 61.9 (50.8, 61.3, 73.6)    | -2.7  | -0.2% (1.6%, -1.9%)         |
| 1220 | New Zealand | Wellington               | 414,818   | 2/2/2020  | 57.7 (50.5, 59.7, 66.2)    | 54.0 (45.8, 55.6, 62.9)    | -3.7  | -1.1% (0.3%, -2.6%)         |
| 1221 | Nicaragua   | Managua                  | 1,063,698 | 2/21/2020 | 55.0 (46.3, 54.6, 62.9)    | 53.4 (45.5, 53.2, 60.6)    | -1.6  | -3.0% (11.6%, -15.6%)       |
| 1222 | Niger       | Niamey                   | 1,291,848 | 3/13/2020 | 57.9 (49.2, 56.0, 65.8)    | 65.0 (58.2, 64.3, 71.1)    | 7.1   | <b>5.2% (8.5%, 2.0%)</b>    |
| 1223 | Niger       | Zinder                   | 489,178   | 3/13/2020 | 50.8 (41.6, 48.0, 58.5)    | 57.6 (49.3, 58.3, 65.0)    | 6.7   | -1.5% (0.3%, -3.3%)         |
| 1224 | Nigeria     | Aba                      | 1,081,466 | 3/18/2020 | 63.9 (51.8, 61.5, 74.4)    | 61.1 (47.8, 60.1, 69.8)    | -2.8  | -1.8% (1.2%, -4.7%)         |
| 1225 | Nigeria     | Abeokuta                 | 532,856   | 3/18/2020 | 64.1 (51.7, 61.8, 73.7)    | 60.1 (51.9, 59.4, 67.7)    | -4.0  | <b>-2.9% (-0.3%, -5.5%)</b> |
| 1226 | Nigeria     | Abuja                    | 3,277,740 | 3/18/2020 | 84.4 (58.1, 77.6, 101.3)   | 71.7 (58.2, 68.2, 79.1)    | -12.7 | <b>-6.6% (-3.7%, -9.5%)</b> |
| 1227 | Nigeria     | Ado-Ekiti                | 479,674   | 3/18/2020 | 56.3 (45.4, 53.3, 63.3)    | 51.6 (45.2, 49.7, 54.8)    | -4.7  | 0.4% (3.0%, -2.1%)          |
| 1228 | Nigeria     | Akure                    | 665,524   | 3/18/2020 | 56.8 (46.9, 54.9, 65.3)    | 51.7 (46.7, 50.2, 56.3)    | -5.1  | -0.1% (2.8%, -2.9%)         |
| 1229 | Nigeria     | Bauchi                   | 597,679   | 3/18/2020 | 53.7 (46.8, 52.7, 60.2)    | 61.5 (55.1, 61.3, 67.7)    | 7.8   | 1.3% (3.1%, -0.5%)          |

|      |         |              |            |           |                          |                         |       |                             |
|------|---------|--------------|------------|-----------|--------------------------|-------------------------|-------|-----------------------------|
| 1230 | Nigeria | Benin City   | 1,727,169  | 3/18/2020 | 65.5 (49.5, 61.8, 78.4)  | 58.1 (48.0, 57.0, 66.4) | -7.4  | -0.7% (1.8%, -3.1%)         |
| 1231 | Nigeria | Calabar      | 579,273    | 3/18/2020 | 55.8 (47.7, 55.6, 63.5)  | 50.6 (44.2, 50.0, 58.0) | -5.2  | <b>-5.2% (-2.8%, -7.5%)</b> |
| 1232 | Nigeria | Effon Alaiye | 383,566    | 3/18/2020 | 57.7 (45.9, 54.7, 65.8)  | 52.7 (45.9, 50.8, 56.5) | -5.1  | <b>-2.9% (-0.2%, -5.6%)</b> |
| 1233 | Nigeria | Enugu        | 772,872    | 3/18/2020 | 64.3 (53.3, 63.8, 74.7)  | 57.5 (50.0, 54.3, 63.0) | -6.8  | -1.7% (0.5%, -4.0%)         |
| 1234 | Nigeria | Gboko        | 441,750    | 3/18/2020 | 52.9 (45.7, 52.4, 59.2)  | 52.1 (47.0, 51.3, 56.3) | -0.8  | -0.1% (1.8%, -1.9%)         |
| 1235 | Nigeria | Gombe        | 508,575    | 3/18/2020 | 54.5 (46.9, 53.1, 61.0)  | 60.2 (54.0, 60.3, 66.7) | 5.8   | 0.5% (2.3%, -1.3%)          |
| 1236 | Nigeria | Ibadan       | 3,551,961  | 3/18/2020 | 71.7 (56.1, 69.0, 84.3)  | 64.4 (57.5, 64.9, 72.1) | -7.4  | <b>-3.9% (-1.4%, -6.3%)</b> |
| 1237 | Nigeria | Ife          | 374,270    | 3/18/2020 | 55.8 (47.4, 54.6, 63.1)  | 54.2 (48.0, 51.3, 57.7) | -1.6  | -1.6% (0.7%, -3.8%)         |
| 1238 | Nigeria | Ijebu-Ode    | 344,676    | 3/18/2020 | 63.4 (52.8, 61.1, 72.8)  | 60.1 (52.1, 58.1, 65.8) | -3.3  | -1.5% (1.6%, -4.5%)         |
| 1239 | Nigeria | Ikot Ekpene  | 382,502    | 3/18/2020 | 60.2 (50.3, 59.1, 68.8)  | 58.2 (49.0, 56.0, 63.4) | -2.0  | -1.9% (0.4%, -4.2%)         |
| 1240 | Nigeria | Ilesha       | 357,052    | 3/18/2020 | 56.3 (47.6, 54.8, 63.4)  | 53.9 (45.9, 50.6, 56.4) | -2.3  | -1.6% (0.9%, -4.1%)         |
| 1241 | Nigeria | Ilorin       | 949,866    | 3/18/2020 | 60.3 (50.3, 59.4, 69.5)  | 57.8 (50.1, 55.3, 62.5) | -2.4  | -0.4% (1.9%, -2.6%)         |
| 1242 | Nigeria | Jos          | 895,288    | 3/18/2020 | 50.7 (43.8, 49.4, 56.7)  | 56.1 (50.1, 54.7, 61.5) | 5.4   | <b>3.0% (5.5%, 0.5%)</b>    |
| 1243 | Nigeria | Kaduna       | 1,113,210  | 3/18/2020 | 61.8 (53.2, 59.6, 69.3)  | 60.4 (53.4, 58.8, 65.7) | -1.4  | -0.6% (1.2%, -2.4%)         |
| 1244 | Nigeria | Kano         | 3,999,050  | 3/18/2020 | 75.6 (64.1, 74.7, 85.5)  | 74.8 (66.7, 75.2, 81.9) | -0.8  | -1.8% (0.2%, -3.8%)         |
| 1245 | Nigeria | Katsina      | 469,557    | 3/18/2020 | 56.3 (48.4, 54.6, 62.8)  | 63.2 (57.9, 61.8, 68.4) | 6.9   | -0.8% (1.3%, -2.8%)         |
| 1246 | Nigeria | Lagos        | 14,368,332 | 3/18/2020 | 88.4 (60.7, 77.3, 104.8) | 65.1 (52.5, 62.3, 73.6) | -23.4 | -2.8% (0.8%, -6.3%)         |
| 1247 | Nigeria | Maiduguri    | 786,485    | 3/18/2020 | 58.2 (50.4, 56.8, 64.8)  | 63.4 (54.8, 63.7, 71.1) | 5.1   | -1.8% (0.4%, -3.9%)         |
| 1248 | Nigeria | Ogbomosho    | 551,474    | 3/18/2020 | 56.3 (47.9, 54.6, 63.9)  | 55.0 (48.2, 52.7, 59.5) | -1.3  | 0.7% (2.9%, -1.5%)          |
| 1249 | Nigeria | Okene        | 464,573    | 3/18/2020 | 56.0 (47.0, 55.7, 63.2)  | 50.7 (45.9, 50.6, 55.2) | -5.3  | <b>-2.0% (-0.4%, -3.7%)</b> |
| 1250 | Nigeria | Okpogho      | 439,855    | 3/18/2020 | 61.3 (50.4, 59.1, 71.5)  | 53.6 (46.5, 52.9, 58.1) | -7.7  | 1.2% (3.3%, -0.9%)          |
| 1251 | Nigeria | Ondo         | 432,222    | 3/18/2020 | 53.1 (45.1, 51.8, 58.6)  | 51.2 (44.5, 49.8, 54.2) | -1.9  | -0.2% (2.0%, -2.3%)         |
| 1252 | Nigeria | Onitsha      | 1,414,790  | 3/18/2020 | 69.6 (57.3, 68.8, 80.0)  | 61.2 (51.8, 59.8, 68.5) | -8.4  | -1.2% (1.1%, -3.6%)         |
| 1253 | Nigeria | Oshogbo      | 713,677    | 3/18/2020 | 58.9 (47.6, 57.2, 67.2)  | 55.0 (47.6, 52.3, 60.0) | -3.9  | -2.2% (0.2%, -4.6%)         |
| 1254 | Nigeria | Owerri       | 872,604    | 3/18/2020 | 65.3 (53.4, 64.6, 75.5)  | 60.6 (51.1, 57.9, 68.1) | -4.7  | -0.6% (1.6%, -2.7%)         |

|      |          |                   |           |           |                           |                         |       |                              |
|------|----------|-------------------|-----------|-----------|---------------------------|-------------------------|-------|------------------------------|
| 1255 | Nigeria  | Oyo               | 427,581   | 3/18/2020 | 56.6 (48.0, 54.6, 64.5)   | 54.1 (48.4, 53.1, 58.8) | -2.6  | -0.4% (2.0%, -2.8%)          |
| 1256 | Nigeria  | Port Harcourt     | 3,020,232 | 3/18/2020 | 79.5 (55.3, 75.0, 97.1)   | 65.2 (52.2, 61.9, 76.4) | -14.3 | <b>-7.9% (-3.9%, -11.8%)</b> |
| 1257 | Nigeria  | Saki              | 376,254   | 3/18/2020 | 50.3 (44.1, 49.5, 55.9)   | 48.9 (44.5, 48.6, 53.2) | -1.4  | 1.2% (3.2%, -0.8%)           |
| 1258 | Nigeria  | Sokoto            | 641,249   | 3/18/2020 | 58.2 (47.8, 55.1, 66.2)   | 68.3 (60.2, 67.7, 76.8) | 10.1  | 0.9% (2.8%, -0.9%)           |
| 1259 | Nigeria  | Umuahia           | 773,822   | 3/18/2020 | 62.5 (52.6, 61.0, 73.2)   | 57.6 (49.0, 55.3, 63.9) | -4.9  | -1.6% (0.7%, -3.9%)          |
| 1260 | Nigeria  | Warri             | 855,941   | 3/18/2020 | 63.5 (48.1, 62.0, 75.0)   | 53.8 (45.9, 53.7, 59.6) | -9.7  | 1.5% (4.0%, -1.0%)           |
| 1261 | Nigeria  | Zaria             | 726,172   | 3/18/2020 | 57.9 (50.0, 56.6, 65.4)   | 61.6 (55.0, 60.4, 68.5) | 3.7   | 0.9% (2.4%, -0.6%)           |
| 1262 | Nigeria  | Ikorodu           | 937,615   | 3/18/2020 | 83.6 (66.7, 81.7, 96.8)   | 74.0 (62.0, 69.4, 82.5) | -9.6  | <b>-6.7% (-4.0%, -9.3%)</b>  |
| 1263 | Nigeria  | Makurdi           | 407,257   | 3/18/2020 | 57.4 (48.8, 56.1, 65.6)   | 57.8 (49.7, 56.4, 63.5) | 0.4   | <b>2.6% (4.8%, 0.4%)</b>     |
| 1264 | Nigeria  | Minna             | 447,959   | 3/18/2020 | 56.8 (48.4, 55.3, 63.8)   | 56.6 (50.3, 55.3, 61.5) | -0.2  | 1.5% (3.5%, -0.4%)           |
| 1265 | Nigeria  | Nnewi             | 1,050,860 | 3/18/2020 | 63.8 (53.6, 62.7, 73.0)   | 57.3 (48.1, 55.8, 65.3) | -6.5  | -1.4% (0.8%, -3.6%)          |
| 1266 | Nigeria  | Uyo               | 1,135,775 | 3/18/2020 | 61.2 (50.8, 60.0, 70.7)   | 57.1 (49.4, 56.3, 63.5) | -4.1  | <b>-5.8% (-3.3%, -8.3%)</b>  |
| 1267 | Nigeria  | Igbidu            | 452,583   | 3/18/2020 | 54.9 (46.7, 54.1, 62.9)   | 52.3 (47.1, 51.2, 57.1) | -2.5  | <b>-2.1% (-0.2%, -4.0%)</b>  |
| 1268 | Nigeria  | Abakaliki         | 572,028   | 3/18/2020 | 55.8 (47.8, 55.3, 62.3)   | 54.6 (48.5, 53.9, 59.3) | -1.3  | -0.3% (1.5%, -2.0%)          |
| 1269 | Nigeria  | Lokoja            | 692,050   | 3/18/2020 | 56.6 (47.5, 55.5, 63.9)   | 54.6 (49.8, 53.8, 58.7) | -2.1  | -0.7% (1.2%, -2.5%)          |
| 1270 | Nigeria  | Birnin Kebbi      | 366,254   | 3/18/2020 | 54.7 (48.1, 53.7, 60.2)   | 62.5 (56.7, 62.0, 66.7) | 7.8   | 0.9% (2.4%, -0.5%)           |
| 1271 | Nigeria  | Lafia             | 336,170   | 3/18/2020 | 55.8 (48.1, 55.2, 63.4)   | 56.5 (50.0, 55.5, 61.5) | 0.7   | <b>2.4% (4.4%, 0.4%)</b>     |
| 1272 | Nigeria  | Potiskum          | 426,253   | 3/18/2020 | 52.6 (43.9, 50.2, 59.1)   | 61.4 (52.7, 61.3, 68.7) | 8.9   | 0.4% (2.3%, -1.4%)           |
| 1273 | Nigeria  | Gwagwalada        | 409,916   | 3/18/2020 | 62.0 (49.5, 60.5, 73.5)   | 56.7 (49.5, 55.7, 62.6) | -5.3  | <b>4.2% (7.2%, 1.3%)</b>     |
| 1274 | Norway   | Oslo              | 1,041,378 | 3/10/2020 | 101.4 (70.6, 85.1, 105.8) | 85.6 (71.3, 84.4, 94.1) | -15.8 | 1.1% (5.0%, -2.8%)           |
| 1275 | Oman     | Masqat (Muscat)   | 1,549,729 | 2/3/2020  | 71.2 (62.1, 70.5, 78.6)   | 67.2 (61.6, 65.7, 70.6) | -4.1  | 0.4% (2.1%, -1.2%)           |
| 1276 | Oman     | Salahah (Salalah) | 420,226   | 2/3/2020  | 54.0 (45.5, 52.9, 60.3)   | 53.6 (45.4, 50.9, 59.4) | -0.3  | -1.3% (0.9%, -3.5%)          |
| 1277 | Pakistan | Bahawalpur        | 844,673   | 1/31/2020 | 83.9 (73.7, 81.3, 93.3)   | 85.9 (77.4, 86.4, 94.8) | 2.0   | <b>-2.9% (-0.7%, -5.1%)</b>  |

|      |          |                |            |           |                             |                            |       |                             |
|------|----------|----------------|------------|-----------|-----------------------------|----------------------------|-------|-----------------------------|
| 1278 | Pakistan | Dera Ghazikhan | 450,809    | 1/31/2020 | 82.2 (71.5, 80.5, 91.0)     | 85.6 (74.2, 87.4, 96.7)    | 3.4   | <b>-2.9% (-0.9%, -4.8%)</b> |
| 1279 | Pakistan | Faisalabad     | 3,462,295  | 1/31/2020 | 116.7 (94.4, 109.6, 128.7)  | 103.0 (87.4, 102.0, 114.5) | -13.8 | <b>-4.5% (-2.2%, -6.7%)</b> |
| 1280 | Pakistan | Gujranwala     | 2,229,220  | 1/31/2020 | 110.1 (88.4, 105.1, 125.3)  | 101.7 (85.3, 101.3, 116.2) | -8.4  | -3.2% (0.4%, -6.7%)         |
| 1281 | Pakistan | Gujrat         | 419,492    | 1/31/2020 | 97.9 (78.5, 89.2, 109.6)    | 89.1 (76.3, 88.1, 99.2)    | -8.8  | <b>-3.2% (-0.8%, -5.4%)</b> |
| 1282 | Pakistan | Hyderabad      | 1,849,829  | 1/31/2020 | 84.0 (72.6, 81.6, 92.5)     | 81.7 (73.7, 80.4, 88.7)    | -2.3  | <b>-2.6% (-1.4%, -3.7%)</b> |
| 1283 | Pakistan | Islamabad      | 1,129,198  | 1/31/2020 | 122.0 (87.9, 108.3, 140.4)  | 101.6 (80.6, 91.8, 111.0)  | -20.4 | <b>-6.3% (-2.9%, -9.6%)</b> |
| 1284 | Pakistan | Jhang          | 437,774    | 1/31/2020 | 84.1 (71.1, 80.9, 95.3)     | 86.9 (75.7, 88.5, 96.0)    | 2.8   | -1.5% (0.3%, -3.2%)         |
| 1285 | Pakistan | Karachi        | 16,093,786 | 1/31/2020 | 156.5 (96.9, 123.6, 183.5)  | 114.8 (84.4, 102.3, 123.8) | -41.8 | <b>-4.9% (-1.2%, -8.5%)</b> |
| 1286 | Pakistan | Kasur          | 381,720    | 1/31/2020 | 110.4 (82.8, 98.3, 119.8)   | 94.2 (79.8, 92.1, 102.5)   | -16.2 | 0.0% (4.6%, -4.4%)          |
| 1287 | Pakistan | Lahore         | 12,642,423 | 1/31/2020 | 167.0 (118.2, 148.5, 185.0) | 125.3 (99.8, 119.8, 139.6) | -41.7 | <b>-6.9% (-4.0%, -9.7%)</b> |
| 1288 | Pakistan | Mardan         | 381,220    | 1/31/2020 | 87.4 (75.9, 86.7, 96.9)     | 87.8 (76.9, 87.4, 96.7)    | 0.4   | -0.6% (0.6%, -1.7%)         |
| 1289 | Pakistan | Multan         | 2,015,091  | 1/31/2020 | 98.3 (84.1, 94.6, 109.2)    | 97.6 (85.4, 97.2, 109.5)   | -0.7  | -1.5% (1.6%, -4.4%)         |
| 1290 | Pakistan | Okara          | 392,904    | 1/31/2020 | 93.9 (78.9, 91.8, 104.6)    | 90.7 (80.4, 90.1, 98.7)    | -3.2  | <b>-2.8% (-1.1%, -4.5%)</b> |
| 1291 | Pakistan | Peshawar       | 2,202,946  | 1/31/2020 | 112.1 (93.0, 111.4, 128.9)  | 102.0 (82.1, 100.6, 119.9) | -10.1 | <b>-4.0% (-1.7%, -6.2%)</b> |
| 1292 | Pakistan | Quetta         | 1,099,546  | 1/31/2020 | 68.8 (57.7, 69.9, 78.9)     | 68.7 (61.5, 69.7, 75.8)    | -0.1  | <b>-2.0% (-0.5%, -3.5%)</b> |
| 1293 | Pakistan | Rahim Yar Khan | 463,949    | 1/31/2020 | 80.3 (70.1, 78.4, 89.6)     | 84.7 (76.4, 84.7, 93.8)    | 4.5   | <b>-2.9% (-0.7%, -4.9%)</b> |
| 1294 | Pakistan | Rawalpindi     | 2,236,905  | 1/31/2020 | 151.1 (106.5, 137.8, 174.1) | 123.2 (93.5, 115.3, 142.6) | -27.9 | <b>-4.3% (-1.4%, -7.2%)</b> |
| 1295 | Pakistan | Sahiwal        | 431,413    | 1/31/2020 | 94.7 (78.8, 90.5, 104.8)    | 92.4 (84.3, 92.1, 99.6)    | -2.3  | -0.4% (0.4%, -1.2%)         |
| 1296 | Pakistan | Sargodha       | 700,095    | 1/31/2020 | 89.2 (74.7, 86.0, 97.5)     | 86.8 (75.8, 87.0, 96.6)    | -2.4  | -1.4% (0.3%, -3.0%)         |
| 1297 | Pakistan | Sheikhupura    | 517,343    | 1/31/2020 | 120.3 (89.2, 106.2, 133.4)  | 109.0 (84.4, 103.9, 121.4) | -11.3 | -1.2% (0.1%, -2.5%)         |

|      |                  |                               |            |           |                            |                           |       |                             |
|------|------------------|-------------------------------|------------|-----------|----------------------------|---------------------------|-------|-----------------------------|
| 1298 | Pakistan         | Sialkot                       | 705,121    | 1/31/2020 | 93.1 (76.6, 86.1, 103.1)   | 88.7 (77.5, 89.3, 99.4)   | -4.4  | -0.6% (0.6%, -1.8%)         |
| 1299 | Pakistan         | Sukkur                        | 534,486    | 1/31/2020 | 81.0 (72.6, 80.6, 89.1)    | 82.7 (77.4, 82.4, 88.1)   | 1.7   | <b>-1.0% (0.0%, -2.0%)</b>  |
| 1300 | Pakistan         | Wah                           | 422,244    | 1/31/2020 | 105.1 (86.5, 101.2, 119.3) | 102.8 (84.4, 98.9, 117.0) | -2.3  | <b>-3.4% (-0.8%, -5.9%)</b> |
| 1301 | Pakistan         | Larkana                       | 534,288    | 1/31/2020 | 75.6 (66.8, 73.6, 83.0)    | 81.0 (73.7, 81.4, 87.5)   | 5.5   | <b>-1.6% (-0.2%, -2.9%)</b> |
| 1302 | Panama           | Ciudad de Panam?(Panama City) | 1,860,291  | 1/22/2020 | 64.6 (50.7, 60.4, 74.9)    | 58.1 (49.2, 55.8, 62.6)   | -6.4  | -3.6% (0.2%, -7.3%)         |
| 1303 | Papua New Guinea | Port Moresby                  | 382,516    | 1/27/2020 | 39.9 (35.9, 39.4, 43.7)    | 37.4 (34.6, 37.3, 40.3)   | -2.4  | <b>1.4% (2.7%, 0.1%)</b>    |
| 1304 | Paraguay         | Asunci?                       | 3,336,562  | 3/10/2020 | 68.9 (55.6, 66.6, 78.2)    | 59.3 (49.6, 59.5, 68.6)   | -9.6  | -0.5% (1.4%, -2.5%)         |
| 1305 | Paraguay         | Ciudad del Este               | 322,000    | 3/10/2020 | 58.8 (49.6, 58.3, 65.4)    | 49.5 (43.4, 49.0, 54.9)   | -9.3  | 0.4% (2.2%, -1.4%)          |
| 1306 | Peru             | Arequipa                      | 922,999    | 3/6/2020  | 75.5 (55.2, 67.9, 87.8)    | 66.1 (46.9, 56.9, 80.0)   | -9.5  | <b>-3.4% (-1.0%, -5.7%)</b> |
| 1307 | Peru             | Chiclayo                      | 637,255    | 3/6/2020  | 43.2 (39.7, 42.9, 46.6)    | 43.5 (40.5, 43.5, 47.1)   | 0.3   | 0.5% (1.4%, -0.4%)          |
| 1308 | Peru             | Chimbote                      | 388,978    | 3/6/2020  | 43.0 (40.0, 42.6, 45.6)    | 42.0 (39.1, 41.8, 44.8)   | -1.1  | 0.0% (0.8%, -0.8%)          |
| 1309 | Peru             | Cusco                         | 470,720    | 3/6/2020  | 40.2 (34.7, 38.9, 44.1)    | 38.4 (33.6, 36.7, 42.0)   | -1.8  | 0.9% (2.4%, -0.6%)          |
| 1310 | Peru             | Huancayo                      | 386,366    | 3/6/2020  | 40.4 (34.2, 38.7, 45.3)    | 39.5 (33.7, 37.7, 44.1)   | -0.9  | <b>-1.4% (-0.1%, -2.6%)</b> |
| 1311 | Peru             | Iquitos                       | 469,582    | 3/6/2020  | 36.3 (31.7, 35.6, 39.8)    | 37.4 (34.0, 37.6, 40.8)   | 1.2   | 0.1% (1.3%, -1.0%)          |
| 1312 | Peru             | Lima                          | 10,719,188 | 3/6/2020  | 110.1 (75.3, 99.7, 134.7)  | 88.1 (53.3, 74.8, 112.0)  | -22.1 | <b>-5.5% (-3.1%, -7.8%)</b> |
| 1313 | Peru             | Piura                         | 474,358    | 3/6/2020  | 46.5 (42.4, 46.4, 50.5)    | 46.0 (42.0, 46.1, 49.6)   | -0.5  | -0.5% (0.7%, -1.6%)         |
| 1314 | Peru             | Tacna                         | 320,453    | 3/6/2020  | 51.3 (46.8, 50.8, 55.3)    | 46.7 (43.0, 46.8, 49.8)   | -4.6  | -0.2% (0.8%, -1.1%)         |
| 1315 | Peru             | Trujillo                      | 864,633    | 3/6/2020  | 45.3 (41.0, 44.8, 48.2)    | 43.9 (39.9, 44.1, 48.3)   | -1.4  | 0.0% (1.3%, -1.3%)          |
| 1316 | Philippines      | Angeles City                  | 509,765    | 1/31/2020 | 64.5 (50.2, 63.4, 77.2)    | 61.7 (53.3, 61.0, 67.6)   | -2.8  | -1.8% (0.5%, -4.1%)         |
| 1317 | Philippines      | Bacolod                       | 613,437    | 1/31/2020 | 48.6 (42.0, 47.7, 54.2)    | 49.5 (42.8, 49.2, 55.3)   | 1.0   | 0.7% (1.8%, -0.5%)          |
| 1318 | Philippines      | Baguio City                   | 372,680    | 1/31/2020 | 58.0 (49.2, 57.6, 65.0)    | 53.9 (47.4, 52.8, 59.3)   | -4.1  | 0.2% (1.9%, -1.4%)          |



|      |             |                                          |            |           |                            |                           |       |                              |
|------|-------------|------------------------------------------|------------|-----------|----------------------------|---------------------------|-------|------------------------------|
| 1319 | Philippines | Basilan City (including City of Isabela) | 533,135    | 1/31/2020 | 40.1 (36.1, 40.4, 44.6)    | 40.9 (35.9, 40.5, 45.3)   | 0.7   | 0.3% (1.2%, -0.7%)           |
| 1320 | Philippines | Batangas City                            | 354,667    | 1/31/2020 | 59.3 (47.5, 56.0, 67.7)    | 58.4 (46.9, 55.0, 69.2)   | -0.8  | 0.3% (1.2%, -0.6%)           |
| 1321 | Philippines | Butuan                                   | 365,112    | 1/31/2020 | 39.3 (34.7, 39.6, 44.4)    | 39.3 (35.2, 39.4, 43.2)   | 0.0   | -0.9% (1.3%, -3.0%)          |
| 1322 | Philippines | Cagayan de Oro City                      | 753,138    | 1/31/2020 | 46.0 (40.8, 45.9, 51.6)    | 48.5 (43.4, 48.5, 53.7)   | 2.5   | -1.7% (0.5%, -3.8%)          |
| 1323 | Philippines | Cebu City                                | 980,070    | 1/31/2020 | 54.3 (44.0, 52.2, 61.0)    | 46.0 (39.8, 45.2, 51.7)   | -8.3  | 0.1% (3.0%, -2.7%)           |
| 1324 | Philippines | Cotabato                                 | 327,985    | 1/31/2020 | 41.5 (36.4, 41.3, 46.2)    | 43.9 (38.7, 44.3, 48.8)   | 2.4   | -0.3% (1.6%, -2.1%)          |
| 1325 | Philippines | Davao City                               | 1,825,450  | 1/31/2020 | 44.6 (38.6, 43.7, 50.4)    | 43.5 (37.8, 42.8, 48.4)   | -1.1  | -0.9% (0.4%, -2.2%)          |
| 1326 | Philippines | General Santos City                      | 652,723    | 1/31/2020 | 38.6 (34.3, 39.2, 43.6)    | 40.0 (35.5, 39.7, 44.2)   | 1.4   | 1.4% (3.9%, -1.0%)           |
| 1327 | Philippines | Iligan                                   | 362,769    | 1/31/2020 | 46.4 (39.9, 46.4, 52.0)    | 45.7 (40.5, 46.0, 51.3)   | -0.8  | 0.1% (1.2%, -0.9%)           |
| 1328 | Philippines | Iloilo City                              | 471,789    | 1/31/2020 | 47.8 (40.0, 46.2, 53.7)    | 46.3 (39.0, 46.4, 54.5)   | -1.5  | 1.6% (4.2%, -1.0%)           |
| 1329 | Philippines | Lapu-Lapu City                           | 470,050    | 1/31/2020 | 54.3 (44.0, 52.2, 61.0)    | 46.0 (39.8, 45.2, 51.7)   | -8.3  | 0.1% (3.0%, -2.7%)           |
| 1330 | Philippines | Lipa City                                | 385,246    | 1/31/2020 | 55.2 (46.1, 53.2, 62.5)    | 52.5 (43.4, 50.2, 60.7)   | -2.7  | -0.2% (0.9%, -1.2%)          |
| 1331 | Philippines | Mandaue City                             | 394,882    | 1/31/2020 | 54.3 (44.0, 52.2, 61.0)    | 46.0 (39.8, 45.2, 51.7)   | -8.3  | 0.1% (3.0%, -2.7%)           |
| 1332 | Philippines | Manila                                   | 13,923,452 | 1/31/2020 | 116.9 (75.4, 105.8, 144.8) | 103.3 (70.9, 88.3, 124.2) | -13.6 | <b>-6.3% (-1.8%, -10.7%)</b> |
| 1333 | Philippines | Zamboanga City                           | 917,477    | 1/31/2020 | 37.7 (34.0, 38.0, 41.9)    | 39.0 (34.9, 38.6, 43.1)   | 1.3   | -1.5% (0.8%, -3.8%)          |

|      |             |                    |         |           |                            |                          |       |                             |
|------|-------------|--------------------|---------|-----------|----------------------------|--------------------------|-------|-----------------------------|
| 1334 | Philippines | San Pedro          | 358,418 | 1/31/2020 | 69.2 (53.3, 64.0, 80.8)    | 63.7 (51.2, 59.4, 73.4)  | -5.5  | -0.7% (0.3%, -1.7%)         |
| 1335 | Philippines | Santa Rosa         | 432,221 | 1/31/2020 | 69.2 (53.3, 64.0, 80.8)    | 63.7 (51.2, 59.4, 73.4)  | -5.5  | -0.7% (0.3%, -1.7%)         |
| 1336 | Philippines | Cabuyao            | 377,220 | 1/31/2020 | 64.6 (50.2, 59.1, 74.8)    | 58.9 (47.8, 55.6, 68.6)  | -5.7  | -1.4% (0.6%, -3.3%)         |
| 1337 | Philippines | Binan              | 386,751 | 1/31/2020 | 69.2 (53.3, 64.0, 80.8)    | 63.7 (51.2, 59.4, 73.4)  | -5.5  | -0.7% (0.3%, -1.7%)         |
| 1338 | Philippines | Calamba            | 524,577 | 1/31/2020 | 60.4 (48.0, 57.6, 68.7)    | 56.9 (48.2, 55.0, 65.4)  | -3.5  | -0.7% (1.4%, -2.8%)         |
| 1339 | Philippines | Antipolo           | 881,018 | 1/31/2020 | 84.7 (55.2, 73.4, 97.2)    | 69.4 (51.0, 63.2, 79.8)  | -15.3 | -2.7% (0.2%, -5.6%)         |
| 1340 | Philippines | Bacoor             | 686,398 | 1/31/2020 | 78.5 (60.2, 73.8, 87.9)    | 73.5 (55.4, 64.2, 85.0)  | -5.0  | <b>-4.9% (-2.5%, -7.3%)</b> |
| 1341 | Philippines | Tarlac             | 367,149 | 1/31/2020 | 59.5 (49.3, 57.9, 68.8)    | 60.0 (52.6, 59.8, 67.0)  | 0.5   | <b>-2.0% (-0.3%, -3.6%)</b> |
| 1342 | Philippines | San Fernando       | 327,808 | 1/31/2020 | 62.3 (51.0, 62.1, 72.7)    | 59.1 (50.2, 58.6, 68.5)  | -3.2  | <b>-2.6% (-0.8%, -4.5%)</b> |
| 1343 | Philippines | Dasmaringas        | 747,208 | 1/31/2020 | 68.9 (53.6, 65.5, 78.9)    | 65.5 (51.9, 60.7, 73.9)  | -3.4  | <b>-2.8% (-0.6%, -4.9%)</b> |
| 1344 | Philippines | General Trias      | 397,715 | 1/31/2020 | 52.6 (41.7, 49.4, 62.3)    | 47.1 (41.2, 46.3, 52.4)  | -5.5  | -0.1% (1.9%, -2.1%)         |
| 1345 | Philippines | Imus               | 527,779 | 1/31/2020 | 78.5 (60.2, 73.8, 87.9)    | 73.5 (55.4, 64.2, 85.0)  | -5.0  | <b>-4.9% (-2.5%, -7.3%)</b> |
| 1346 | Philippines | San Jose del Monte | 607,692 | 1/31/2020 | 67.1 (49.8, 62.3, 82.5)    | 62.4 (48.1, 59.7, 72.4)  | -4.8  | -1.7% (0.6%, -4.0%)         |
| 1347 | Poland      | Bydgoszcz          | 347,522 | 3/9/2020  | 91.0 (64.7, 84.1, 103.4)   | 82.1 (73.7, 79.3, 88.7)  | -8.9  | -0.8% (7.1%, -8.0%)         |
| 1348 | Poland      | Krak? (Cracow)     | 768,731 | 3/9/2020  | 121.6 (89.2, 106.1, 128.8) | 95.0 (79.5, 89.9, 103.8) | -26.6 | -1.2% (1.6%, -3.9%)         |
| 1349 | Poland      | Gda?sk             | 465,475 | 3/9/2020  | 93.2 (69.0, 85.0, 104.2)   | 84.5 (72.7, 81.8, 92.9)  | -8.6  | -1.4% (5.1%, -7.4%)         |
| 1350 | Poland      | ???                | 676,830 | 3/9/2020  | 110.2 (81.2, 95.8, 117.7)  | 92.5 (78.4, 89.4, 101.3) | -17.7 | -2.9% (1.6%, -7.2%)         |
| 1351 | Poland      | Lublin             | 334,720 | 3/9/2020  | 95.1 (74.1, 84.6, 103.8)   | 81.0 (74.3, 79.6, 84.9)  | -14.1 | 0.2% (2.3%, -1.8%)          |
| 1352 | Poland      | Pozna?             | 531,030 | 3/9/2020  | 96.8 (76.0, 92.8, 111.2)   | 87.9 (75.7, 85.5, 97.5)  | -8.9  | -1.1% (5.3%, -7.2%)         |
| 1353 | Poland      | Szczecin           | 401,370 | 3/9/2020  | 97.0 (76.5, 92.2, 109.7)   | 90.7 (78.5, 88.5, 98.6)  | -6.3  | 0.2% (6.0%, -5.3%)          |

|      |                   |                                 |           |           |                             |                             |       |                               |
|------|-------------------|---------------------------------|-----------|-----------|-----------------------------|-----------------------------|-------|-------------------------------|
| 1354 | Poland            | Warszawa (Warsaw)               | 1,783,251 | 3/9/2020  | 118.2 (85.7, 104.3, 130.0)  | 98.0 (83.9, 94.7, 106.6)    | -20.3 | 0.0% (4.1%, -3.9%)            |
| 1355 | Poland            | Wroc?aw                         | 641,401   | 3/9/2020  | 102.1 (83.4, 95.7, 114.8)   | 91.5 (79.2, 87.0, 100.7)    | -10.7 | 0.9% (2.5%, -0.6%)            |
| 1356 | Portugal          | Lisboa (Lisbon)                 | 2,956,879 | 3/9/2020  | 102.9 (78.4, 95.9, 116.2)   | 93.0 (75.9, 89.9, 106.7)    | -9.9  | <b>-3.1% (-1.1%, -5.0%)</b>   |
| 1357 | Portugal          | Porto                           | 1,312,947 | 3/9/2020  | 102.7 (79.3, 98.3, 120.5)   | 94.0 (76.5, 88.8, 103.1)    | -8.7  | <b>-3.8% (-1.2%, -6.3%)</b>   |
| 1358 | Puerto Rico       | San Juan                        | 2,448,417 | 1/30/2020 | 54.9 (47.9, 54.8, 61.6)     | 54.1 (48.8, 53.8, 58.1)     | -0.8  | -1.0% (0.1%, -2.1%)           |
| 1359 | Puerto Rico       | Aguadilla-Isabela-San Sebastian | 299,956   | 1/30/2020 | 51.8 (45.9, 51.4, 58.3)     | 51.2 (46.6, 50.6, 55.2)     | -0.6  | 0.2% (1.5%, -1.0%)            |
| 1360 | Qatar             | Ad-Dawahh (Doha)                | 641,380   | 1/24/2020 | 172.8 (118.4, 149.5, 206.7) | 168.0 (111.7, 134.1, 185.1) | -4.8  | <b>-9.1% (-5.7%, -12.4%)</b>  |
| 1361 | Qatar             | Ar-Rayyan                       | 737,903   | 1/24/2020 | 169.4 (118.5, 149.5, 190.7) | 165.4 (110.8, 136.4, 183.4) | -4.0  | <b>-9.8% (-6.5%, -13.0%)</b>  |
| 1362 | Qatar             | Doha Industrial Area            | 418,739   | 1/24/2020 | 184.1 (123.3, 157.0, 208.4) | 176.7 (114.0, 149.5, 204.2) | -7.5  | <b>-10.7% (-6.8%, -14.5%)</b> |
| 1363 | Republic of Korea | Ansan                           | 760,764   | 1/31/2020 | 299.8 (156.5, 227.2, 346.0) | 214.4 (130.3, 170.9, 243.0) | -85.4 | -1.2% (4.4%, -6.5%)           |
| 1364 | Republic of Korea | Anyang                          | 567,945   | 1/31/2020 | 325.3 (178.8, 258.4, 417.9) | 242.0 (148.8, 193.5, 303.6) | -83.3 | 0.8% (5.3%, -3.5%)            |
| 1365 | Republic of Korea | Changwon                        | 1,055,974 | 1/31/2020 | 162.3 (111.2, 145.0, 192.3) | 149.9 (104.9, 128.9, 175.2) | -12.4 | 3.2% (8.5%, -1.8%)            |
| 1366 | Republic of Korea | Cheonan                         | 679,802   | 1/31/2020 | 200.3 (127.3, 172.0, 242.7) | 153.9 (109.3, 136.3, 183.8) | -46.4 | 1.4% (4.9%, -2.0%)            |

|      |                   |             |           |           |                             |                             |       |                           |
|------|-------------------|-------------|-----------|-----------|-----------------------------|-----------------------------|-------|---------------------------|
| 1367 | Republic of Korea | Cheongju    | 717,027   | 1/31/2020 | 182.6 (113.5, 151.7, 231.8) | 141.8 (103.0, 126.3, 168.8) | -40.7 | 1.5% (5.7%, -2.5%)        |
| 1368 | Republic of Korea | Jeju        | 343,168   | 1/31/2020 | 93.1 (77.3, 88.1, 103.3)    | 86.0 (73.9, 82.3, 93.1)     | -7.1  | 0.7% (2.5%, -1.1%)        |
| 1369 | Republic of Korea | Jeonju      | 663,145   | 1/31/2020 | 140.8 (102.8, 125.0, 169.8) | 113.3 (90.0, 107.4, 128.7)  | -27.4 | 1.5% (4.5%, -1.4%)        |
| 1370 | Republic of Korea | Siheung     | 440,381   | 1/31/2020 | 325.3 (178.8, 258.4, 417.9) | 242.0 (148.8, 193.5, 303.6) | -83.3 | 0.8% (5.3%, -3.5%)        |
| 1371 | Republic of Korea | Incheon     | 2,801,039 | 1/31/2020 | 307.4 (164.1, 230.1, 370.2) | 224.9 (135.4, 171.2, 260.6) | -82.6 | -1.3% (5.4%, -7.5%)       |
| 1372 | Republic of Korea | Gimhae      | 314,440   | 1/31/2020 | 167.7 (111.7, 145.5, 202.7) | 149.1 (101.4, 128.5, 173.1) | -18.6 | <b>5.2% (10.6%, 0.1%)</b> |
| 1373 | Republic of Korea | Gumi        | 386,622   | 1/31/2020 | 131.4 (98.3, 116.6, 150.5)  | 117.7 (93.0, 108.4, 132.5)  | -13.7 | 1.7% (5.9%, -2.3%)        |
| 1374 | Republic of Korea | Gwangju     | 1,521,506 | 1/31/2020 | 132.8 (97.3, 119.9, 150.2)  | 111.9 (86.3, 102.6, 124.6)  | -20.9 | 1.7% (5.3%, -1.7%)        |
| 1375 | Republic of Korea | Gwangmyeong | 345,890   | 1/31/2020 | 356.1 (195.4, 275.5, 462.7) | 283.2 (161.8, 222.1, 346.8) | -72.9 | 0.5% (5.4%, -4.2%)        |
| 1376 | Republic of Korea | Pohang      | 359,226   | 1/31/2020 | 159.2 (113.2, 140.9, 182.2) | 142.7 (108.6, 129.5, 154.6) | -16.5 | 1.0% (6.2%, -4.0%)        |
| 1377 | Republic of Korea | Bucheon     | 832,093   | 1/31/2020 | 330.0 (179.8, 262.7, 404.4) | 277.5 (149.1, 201.3, 329.9) | -52.5 | 1.1% (5.9%, -3.6%)        |
| 1378 | Republic of Korea | Busan       | 3,465,190 | 1/31/2020 | 191.4 (123.9, 169.2, 234.9) | 164.3 (114.2, 156.4, 186.2) | -27.1 | -2.3% (1.9%, -6.3%)       |
| 1379 | Republic of Korea | Seoul       | 9,963,452 | 1/31/2020 | 328.5 (174.0, 274.4, 414.5) | 269.7 (145.4, 227.0, 337.0) | -58.8 | 3.3% (10.8%, -3.6%)       |
| 1380 | Republic of Korea | Seongnam    | 943,768   | 1/31/2020 | 325.7 (176.2, 275.5, 425.5) | 253.5 (145.2, 208.7, 306.7) | -72.1 | <b>5.2% (9.7%, 0.8%)</b>  |
| 1381 | Republic of Korea | Suweon      | 1,311,321 | 1/31/2020 | 301.6 (162.5, 232.8, 387.9) | 215.3 (131.5, 181.6, 259.6) | -86.2 | 1.1% (5.4%, -3.1%)        |

|      |                     |                       |           |           |                             |                             |       |                          |
|------|---------------------|-----------------------|-----------|-----------|-----------------------------|-----------------------------|-------|--------------------------|
| 1382 | Republic of Korea   | Daegu                 | 2,198,962 | 1/31/2020 | 182.8 (125.2, 160.4, 209.9) | 164.0 (114.5, 138.9, 184.8) | -18.8 | 2.1% (6.7%, -2.3%)       |
| 1383 | Republic of Korea   | Daejon                | 1,565,656 | 1/31/2020 | 180.8 (117.1, 147.8, 215.1) | 138.9 (100.9, 123.5, 159.9) | -41.9 | 2.6% (6.9%, -1.7%)       |
| 1384 | Republic of Korea   | Uijeongbu             | 423,624   | 1/31/2020 | 224.1 (116.5, 166.0, 251.5) | 189.3 (106.9, 139.8, 235.6) | -34.8 | 2.5% (9.1%, -3.8%)       |
| 1385 | Republic of Korea   | Ulsan                 | 910,330   | 1/31/2020 | 200.2 (129.1, 176.9, 250.7) | 179.2 (115.8, 156.3, 228.5) | -21.0 | 0.5% (6.5%, -5.2%)       |
| 1386 | Republic of Korea   | Goyang                | 1,069,196 | 1/31/2020 | 225.1 (120.3, 165.2, 254.7) | 218.1 (112.4, 152.4, 253.6) | -7.0  | -0.6% (7.2%, -7.8%)      |
| 1387 | Republic of Korea   | Yongin                | 1,083,345 | 1/31/2020 | 274.9 (143.4, 214.7, 353.5) | 191.0 (114.4, 151.4, 240.8) | -83.9 | <b>4.7% (9.2%, 0.3%)</b> |
| 1388 | Republic of Moldova | Chi?in?u              | 499,034   | 2/26/2020 | 83.4 (69.2, 81.4, 93.4)     | 82.9 (72.3, 82.5, 90.7)     | -0.6  | 0.0% (1.0%, -0.9%)       |
| 1389 | Romania             | Bucuresti (Bucharest) | 1,803,247 | 1/27/2020 | 120.6 (91.5, 107.1, 128.5)  | 107.7 (86.0, 100.0, 114.3)  | -12.9 | -1.0% (0.7%, -2.7%)      |
| 1390 | Romania             | Cluj-Napoca           | 307,851   | 1/27/2020 | 89.4 (73.5, 82.3, 93.3)     | 75.9 (67.0, 74.7, 82.3)     | -13.5 | 1.6% (3.4%, -0.1%)       |
| 1391 | Romania             | Iasi                  | 317,313   | 1/27/2020 | 79.5 (65.7, 79.4, 87.4)     | 76.4 (68.0, 75.6, 82.0)     | -3.1  | <b>1.6% (2.8%, 0.4%)</b> |
| 1392 | Romania             | Timisoara             | 306,736   | 1/27/2020 | 88.1 (74.7, 84.5, 94.0)     | 78.8 (69.6, 77.0, 84.7)     | -9.2  | -0.4% (2.1%, -2.8%)      |
| 1393 | Russian Federation  | Arkhangelsk           | 350,200   | 1/30/2020 | 83.4 (61.4, 78.9, 91.0)     | 79.1 (66.7, 79.3, 91.7)     | -4.3  | -1.2% (6.2%, -8.1%)      |
| 1394 | Russian Federation  | Astrakhan             | 534,947   | 1/30/2020 | 71.6 (56.0, 72.3, 85.2)     | 72.3 (62.7, 72.9, 81.5)     | 0.7   | 0.3% (3.1%, -2.4%)       |
| 1395 | Russian Federation  | Barnaul               | 639,783   | 1/30/2020 | 136.8 (84.4, 102.5, 135.2)  | 104.6 (79.0, 89.1, 115.0)   | -32.3 | 2.3% (7.9%, -3.0%)       |
| 1396 | Russian Federation  | Belgorod              | 407,941   | 1/30/2020 | 96.5 (74.5, 88.5, 103.3)    | 89.4 (75.0, 85.1, 95.7)     | -7.2  | -0.2% (4.3%, -4.5%)      |

|      |                    |                                 |           |           |                            |                            |       |                             |
|------|--------------------|---------------------------------|-----------|-----------|----------------------------|----------------------------|-------|-----------------------------|
| 1397 | Russian Federation | Bryansk                         | 398,586   | 1/30/2020 | 82.8 (66.7, 79.3, 92.0)    | 78.5 (68.7, 76.4, 86.9)    | -4.3  | <b>4.7% (8.3%, 1.3%)</b>    |
| 1398 | Russian Federation | Cheboksary                      | 505,870   | 1/30/2020 | 96.2 (71.1, 84.8, 103.1)   | 83.6 (71.4, 80.5, 91.4)    | -12.6 | -0.9% (1.4%, -3.1%)         |
| 1399 | Russian Federation | Chelyabinsk                     | 1,227,795 | 1/30/2020 | 172.1 (89.3, 114.3, 160.1) | 130.3 (92.5, 111.1, 138.0) | -41.9 | <b>-6.3% (-2.8%, -9.8%)</b> |
| 1400 | Russian Federation | Cherepovets                     | 319,917   | 1/30/2020 | 112.1 (72.2, 88.3, 112.7)  | 90.4 (73.2, 83.9, 101.1)   | -21.7 | -1.2% (1.9%, -4.3%)         |
| 1401 | Russian Federation | Chita                           | 357,079   | 1/30/2020 | 98.6 (68.4, 84.2, 105.8)   | 81.4 (67.4, 77.6, 90.3)    | -17.2 | <b>11.1% (18.2%, 4.4%)</b>  |
| 1402 | Russian Federation | Yekaterinburg                   | 1,503,812 | 1/30/2020 | 130.4 (81.6, 101.3, 135.7) | 104.5 (77.2, 93.5, 107.6)  | -25.9 | 4.2% (9.2%, -0.6%)          |
| 1403 | Russian Federation | Irkutsk                         | 638,843   | 1/30/2020 | 159.5 (87.4, 112.2, 162.0) | 120.2 (84.8, 103.6, 134.2) | -39.3 | 1.2% (8.0%, -5.3%)          |
| 1404 | Russian Federation | Ivanovo                         | 403,021   | 1/30/2020 | 103.5 (72.6, 86.5, 104.0)  | 87.9 (73.4, 81.2, 93.2)    | -15.6 | -2.3% (0.7%, -5.2%)         |
| 1405 | Russian Federation | Izhevsk                         | 651,338   | 1/30/2020 | 105.2 (72.6, 85.8, 109.4)  | 89.5 (72.7, 83.6, 96.0)    | -15.7 | 0.9% (6.9%, -4.7%)          |
| 1406 | Russian Federation | Tver                            | 424,733   | 1/30/2020 | 91.1 (63.1, 78.0, 94.0)    | 77.8 (67.3, 77.3, 86.1)    | -13.3 | 2.7% (6.1%, -0.6%)          |
| 1407 | Russian Federation | Kaliningrad, Kaliningrad Oblast | 483,659   | 1/30/2020 | 89.2 (68.7, 83.4, 98.0)    | 78.0 (68.2, 77.1, 85.4)    | -11.2 | <b>3.3% (5.2%, 1.4%)</b>    |
| 1408 | Russian Federation | Kaluga                          | 348,750   | 1/30/2020 | 90.3 (66.3, 81.8, 95.8)    | 80.9 (66.9, 78.0, 91.6)    | -9.4  | -4.4% (1.2%, -9.7%)         |
| 1409 | Russian Federation | Kazan                           | 1,272,063 | 1/30/2020 | 124.7 (80.5, 98.0, 123.2)  | 97.8 (79.5, 88.7, 105.4)   | -26.9 | <b>-4.9% (-1.0%, -8.7%)</b> |
| 1410 | Russian Federation | Kemerovo                        | 565,759   | 1/30/2020 | 140.5 (84.3, 102.2, 145.8) | 111.0 (79.7, 93.7, 118.5)  | -29.5 | 3.3% (9.1%, -2.2%)          |

|      |                    |                     |            |           |                             |                             |        |                              |
|------|--------------------|---------------------|------------|-----------|-----------------------------|-----------------------------|--------|------------------------------|
| 1411 | Russian Federation | Khabarovsk          | 633,151    | 1/30/2020 | 91.2 (63.9, 80.0, 101.7)    | 89.5 (74.1, 86.8, 102.6)    | -1.7   | 1.1% (4.5%, -2.1%)           |
| 1412 | Russian Federation | Krasnodar           | 957,214    | 1/30/2020 | 105.3 (82.0, 102.1, 123.5)  | 98.1 (75.8, 91.3, 110.1)    | -7.2   | -8.8% (0.9%, -17.7%)         |
| 1413 | Russian Federation | Krasnoyarsk         | 1,137,494  | 1/30/2020 | 112.2 (75.6, 92.1, 125.8)   | 99.4 (72.9, 84.3, 101.3)    | -12.9  | -4.0% (0.9%, -8.7%)          |
| 1414 | Russian Federation | Kurgan              | 313,542    | 1/30/2020 | 95.7 (68.8, 81.1, 93.8)     | 77.6 (66.0, 76.1, 84.9)     | -18.1  | -2.1% (0.7%, -4.8%)          |
| 1415 | Russian Federation | Kursk               | 464,731    | 1/30/2020 | 86.6 (67.7, 82.1, 94.1)     | 79.2 (69.2, 76.5, 87.9)     | -7.3   | 2.1% (6.7%, -2.2%)           |
| 1416 | Russian Federation | Lipetsk             | 507,291    | 1/30/2020 | 114.4 (81.8, 98.1, 127.4)   | 96.6 (76.7, 87.9, 107.9)    | -17.8  | <b>-7.1% (-1.3%, -12.6%)</b> |
| 1417 | Russian Federation | Magnitogorsk        | 420,661    | 1/30/2020 | 113.2 (78.0, 96.6, 125.5)   | 98.2 (75.1, 91.9, 111.5)    | -15.0  | -1.6% (3.8%, -6.8%)          |
| 1418 | Russian Federation | Makhachkala         | 599,792    | 1/30/2020 | 82.9 (68.6, 81.3, 92.3)     | 79.4 (70.5, 78.3, 85.9)     | -3.5   | 0.4% (3.4%, -2.5%)           |
| 1419 | Russian Federation | Moskva (Moscow)     | 12,537,954 | 1/30/2020 | 338.6 (160.7, 240.9, 354.7) | 218.4 (138.3, 186.6, 245.3) | -120.2 | 2.6% (10.8%, -4.9%)          |
| 1420 | Russian Federation | Naberezhnye Tchelny | 534,726    | 1/30/2020 | 132.7 (81.5, 99.6, 124.5)   | 104.5 (77.3, 89.8, 109.3)   | -28.2  | -2.0% (3.4%, -7.2%)          |
| 1421 | Russian Federation | Nizhniy Novgorod    | 1,257,754  | 1/30/2020 | 127.3 (81.3, 95.2, 121.6)   | 101.4 (79.6, 91.2, 107.5)   | -25.9  | -1.6% (4.5%, -7.3%)          |
| 1422 | Russian Federation | Nizhny Tagil        | 349,705    | 1/30/2020 | 96.7 (65.7, 81.9, 97.5)     | 82.3 (64.8, 80.8, 92.2)     | -14.4  | 2.4% (5.5%, -0.5%)           |
| 1423 | Russian Federation | Novokuznetsk        | 550,575    | 1/30/2020 | 172.6 (90.8, 122.7, 197.7)  | 134.4 (84.9, 107.6, 157.7)  | -38.2  | 0.4% (6.5%, -5.3%)           |
| 1424 | Russian Federation | Novosibirsk         | 1,663,748  | 1/30/2020 | 166.3 (94.5, 121.8, 184.4)  | 131.7 (94.2, 116.3, 145.9)  | -34.6  | 3.7% (9.7%, -2.0%)           |

|      |                    |                                |           |           |                             |                            |       |                            |
|------|--------------------|--------------------------------|-----------|-----------|-----------------------------|----------------------------|-------|----------------------------|
| 1425 | Russian Federation | Omsk                           | 1,182,339 | 1/30/2020 | 118.5 (81.2, 97.0, 123.8)   | 105.0 (78.4, 93.2, 113.3)  | -13.5 | -0.3% (4.6%, -5.1%)        |
| 1426 | Russian Federation | Vladikavkaz                    | 302,105   | 1/30/2020 | 104.3 (81.8, 92.9, 114.0)   | 89.5 (75.6, 85.8, 95.0)    | -14.8 | 2.2% (5.8%, -1.4%)         |
| 1427 | Russian Federation | Orel                           | 316,624   | 1/30/2020 | 85.9 (65.5, 81.3, 93.9)     | 78.3 (66.3, 76.0, 86.2)    | -7.6  | <b>2.1% (3.9%, 0.4%)</b>   |
| 1428 | Russian Federation | Orenburg                       | 568,812   | 1/30/2020 | 87.8 (67.3, 82.1, 97.5)     | 78.7 (65.3, 77.9, 89.1)    | -9.1  | <b>11.1% (18.6%, 3.9%)</b> |
| 1429 | Russian Federation | Penza                          | 523,093   | 1/30/2020 | 89.6 (69.8, 83.8, 96.1)     | 82.9 (68.2, 77.9, 86.1)    | -6.7  | 0.5% (2.0%, -0.9%)         |
| 1430 | Russian Federation | Perm                           | 1,071,419 | 1/30/2020 | 111.7 (74.0, 89.2, 116.4)   | 95.9 (76.3, 86.3, 101.6)   | -15.8 | 4.2% (10.1%, -1.4%)        |
| 1431 | Russian Federation | Podolsk                        | 324,216   | 1/30/2020 | 202.9 (104.5, 136.2, 207.1) | 128.5 (93.2, 114.2, 141.2) | -74.4 | 3.7% (7.8%, -0.3%)         |
| 1432 | Russian Federation | Rostov-na-Donu (Rostov-on-Don) | 1,136,201 | 1/30/2020 | 103.7 (79.5, 97.0, 115.8)   | 98.8 (80.2, 93.9, 111.9)   | -5.0  | -3.0% (1.9%, -7.7%)        |
| 1433 | Russian Federation | Ryazan                         | 540,317   | 1/30/2020 | 113.5 (80.2, 95.1, 115.5)   | 94.9 (76.4, 87.9, 102.1)   | -18.5 | 1.1% (6.8%, -4.4%)         |
| 1434 | Russian Federation | Samara                         | 1,163,296 | 1/30/2020 | 114.0 (80.5, 96.2, 122.0)   | 101.8 (77.9, 88.5, 108.3)  | -12.2 | 1.3% (7.2%, -4.3%)         |
| 1435 | Russian Federation | Saransk                        | 321,997   | 1/30/2020 | 88.7 (67.7, 83.0, 95.4)     | 79.1 (66.5, 78.1, 86.2)    | -9.6  | -0.9% (7.6%, -8.7%)        |
| 1436 | Russian Federation | Saratov                        | 842,680   | 1/30/2020 | 93.9 (73.9, 89.5, 106.4)    | 93.1 (73.5, 83.5, 96.6)    | -0.7  | <b>10.3% (18.7%, 2.5%)</b> |
| 1437 | Russian Federation | Ulyanovsk                      | 624,896   | 1/30/2020 | 97.5 (71.8, 84.3, 100.7)    | 82.6 (71.0, 79.5, 90.1)    | -14.9 | 0.4% (3.1%, -2.1%)         |
| 1438 | Russian Federation | Smolensk                       | 328,887   | 1/30/2020 | 71.6 (55.8, 71.0, 83.0)     | 71.7 (62.3, 73.1, 80.0)    | 0.1   | <b>3.2% (5.5%, 1.0%)</b>   |



|      |                    |                                    |           |           |                            |                            |       |                            |
|------|--------------------|------------------------------------|-----------|-----------|----------------------------|----------------------------|-------|----------------------------|
| 1439 | Russian Federation | Sochi                              | 450,024   | 1/30/2020 | 73.9 (63.1, 74.6, 84.1)    | 72.5 (66.7, 72.7, 79.1)    | -1.4  | 1.3% (6.2%, -3.4%)         |
| 1440 | Russian Federation | Sankt Peterburg (Saint Petersburg) | 5,467,808 | 1/30/2020 | 185.0 (98.4, 130.2, 199.6) | 122.6 (92.8, 113.0, 143.8) | -62.5 | 0.3% (6.6%, -5.7%)         |
| 1441 | Russian Federation | Stavropol                          | 450,094   | 1/30/2020 | 82.1 (67.5, 80.9, 91.9)    | 80.0 (67.4, 78.9, 88.2)    | -2.0  | -0.6% (1.2%, -2.3%)        |
| 1442 | Russian Federation | Surgut                             | 390,259   | 1/30/2020 | 93.3 (66.8, 82.3, 100.8)   | 80.7 (68.2, 78.3, 91.7)    | -12.6 | 3.5% (11.9%, -4.3%)        |
| 1443 | Russian Federation | Tolyatti                           | 700,252   | 1/30/2020 | 111.8 (75.2, 92.0, 116.4)  | 94.6 (75.2, 84.8, 104.7)   | -17.2 | -1.4% (2.4%, -5.1%)        |
| 1444 | Russian Federation | Tomsk                              | 595,642   | 1/30/2020 | 116.5 (74.5, 87.6, 106.1)  | 92.6 (70.9, 82.7, 94.6)    | -23.9 | 2.0% (8.6%, -4.3%)         |
| 1445 | Russian Federation | Tula                               | 473,159   | 1/30/2020 | 103.9 (76.4, 92.1, 111.1)  | 93.6 (76.4, 88.0, 103.0)   | -10.3 | <b>11.7% (22.1%, 2.1%)</b> |
| 1446 | Russian Federation | Tyumen                             | 843,196   | 1/30/2020 | 119.7 (73.1, 88.7, 114.3)  | 87.0 (73.5, 83.6, 95.7)    | -32.8 | 4.6% (10.7%, -1.1%)        |
| 1447 | Russian Federation | Ufa                                | 1,136,291 | 1/30/2020 | 119.3 (77.1, 92.9, 122.6)  | 98.2 (75.0, 86.7, 106.9)   | -21.1 | 2.9% (9.3%, -3.2%)         |
| 1448 | Russian Federation | Ulan-Ude                           | 443,948   | 1/30/2020 | 103.2 (71.0, 85.1, 99.2)   | 82.4 (67.0, 76.8, 89.2)    | -20.7 | 1.3% (6.4%, -3.5%)         |
| 1449 | Russian Federation | Kirov                              | 513,003   | 1/30/2020 | 92.8 (67.6, 81.3, 97.3)    | 83.8 (69.6, 81.2, 91.3)    | -9.0  | -1.9% (0.7%, -4.5%)        |
| 1450 | Russian Federation | Vladimir                           | 359,277   | 1/30/2020 | 105.1 (73.3, 86.4, 104.5)  | 89.4 (71.7, 80.9, 92.7)    | -15.7 | 1.3% (4.2%, -1.5%)         |
| 1451 | Russian Federation | Vladivostok                        | 609,754   | 1/30/2020 | 89.4 (71.9, 82.3, 98.2)    | 82.0 (68.5, 77.8, 89.0)    | -7.4  | <b>8.4% (15.2%, 2.1%)</b>  |

|      |                    |                |           |           |                             |                             |        |                             |
|------|--------------------|----------------|-----------|-----------|-----------------------------|-----------------------------|--------|-----------------------------|
| 1452 | Russian Federation | Volgograd      | 1,004,688 | 1/30/2020 | 87.9 (70.6, 85.4, 100.1)    | 83.9 (70.7, 83.4, 94.6)     | -4.1   | 1.9% (5.9%, -1.8%)          |
| 1453 | Russian Federation | Vologda        | 316,737   | 1/30/2020 | 93.2 (62.3, 73.2, 90.4)     | 76.5 (63.9, 74.5, 83.4)     | -16.8  | 0.2% (3.4%, -2.9%)          |
| 1454 | Russian Federation | Volzhsky       | 329,977   | 1/30/2020 | 82.0 (64.5, 80.7, 95.6)     | 81.1 (69.2, 81.8, 90.9)     | -1.0   | 2.3% (5.1%, -0.4%)          |
| 1455 | Russian Federation | Voronezh       | 1,067,719 | 1/30/2020 | 107.6 (78.7, 97.2, 116.6)   | 93.4 (77.2, 88.2, 106.2)    | -14.2  | -2.4% (3.3%, -7.8%)         |
| 1456 | Russian Federation | Yakutsk        | 328,086   | 1/30/2020 | 88.7 (70.3, 84.8, 99.6)     | 84.1 (70.8, 82.1, 90.6)     | -4.6   | -0.7% (5.1%, -6.1%)         |
| 1457 | Russian Federation | Yaroslavl      | 612,365   | 1/30/2020 | 123.7 (75.6, 92.5, 118.7)   | 97.2 (71.3, 83.4, 101.1)    | -26.5  | <b>-4.0% (-0.2%, -7.6%)</b> |
| 1458 | Russian Federation | Balashikha     | 514,662   | 1/30/2020 | 284.5 (117.6, 174.4, 267.7) | 174.6 (105.7, 138.7, 195.2) | -109.9 | 0.2% (9.7%, -8.4%)          |
| 1459 | Rwanda             | Kigali         | 1,132,101 | 1/27/2020 | 43.9 (36.8, 43.1, 50.4)     | 42.8 (35.9, 42.3, 50.0)     | -1.1   | <b>-1.9% (-0.3%, -3.5%)</b> |
| 1460 | Saudi Arabia       | Buraydah       | 668,775   | 3/8/2020  | 97.5 (75.4, 88.0, 108.2)    | 94.0 (79.1, 87.8, 101.2)    | -3.5   | -1.1% (0.2%, -2.3%)         |
| 1461 | Saudi Arabia       | Ad-Dammam      | 1,252,523 | 3/8/2020  | 153.5 (104.4, 134.9, 180.1) | 134.7 (93.1, 114.7, 162.1)  | -18.8  | <b>-4.4% (-1.0%, -7.8%)</b> |
| 1462 | Saudi Arabia       | Hafar al-Batin | 353,380   | 3/8/2020  | 69.5 (60.9, 70.0, 76.8)     | 72.8 (67.9, 71.8, 77.3)     | 3.3    | -1.4% (0.1%, -2.9%)         |
| 1463 | Saudi Arabia       | Ha'il          | 400,389   | 3/8/2020  | 90.7 (69.8, 81.3, 100.2)    | 94.3 (74.5, 84.0, 97.7)     | 3.6    | <b>-2.7% (-0.2%, -5.1%)</b> |
| 1464 | Saudi Arabia       | Hufuf-Mubarraz | 836,727   | 3/8/2020  | 99.7 (80.8, 95.4, 110.9)    | 100.2 (85.3, 99.5, 112.9)   | 0.5    | <b>-2.9% (-0.8%, -5.1%)</b> |
| 1465 | Saudi Arabia       | Jiddah         | 4,610,176 | 3/8/2020  | 168.6 (111.4, 141.7, 194.0) | 131.1 (95.4, 116.1, 140.2)  | -37.5  | <b>-4.7% (-2.1%, -7.2%)</b> |
| 1466 | Saudi Arabia       | Jubayl         | 605,743   | 3/8/2020  | 172.4 (115.4, 152.4, 211.1) | 159.8 (104.6, 139.2, 187.2) | -12.6  | <b>-2.3% (-0.6%, -3.9%)</b> |
| 1467 | Saudi Arabia       | Khamis Mushayt | 547,724   | 3/8/2020  | 69.2 (57.9, 66.0, 76.9)     | 74.9 (59.5, 71.6, 85.3)     | 5.7    | -2.0% (0.9%, -4.8%)         |
| 1468 | Saudi Arabia       | Khubar         | 329,071   | 3/8/2020  | 155.3 (106.6, 131.1, 187.2) | 135.9 (97.8, 118.6, 154.4)  | -19.4  | <b>-4.3% (-1.1%, -7.5%)</b> |
| 1469 | Saudi Arabia       | Makkah (Mecca) | 2,042,106 | 3/8/2020  | 135.3 (95.2, 119.6, 155.0)  | 119.0 (88.1, 103.1, 137.6)  | -16.3  | <b>-4.6% (-2.0%, -7.1%)</b> |

|      |              |                      |           |           |                             |                             |       |                             |
|------|--------------|----------------------|-----------|-----------|-----------------------------|-----------------------------|-------|-----------------------------|
| 1470 | Saudi Arabia | Al-Madinah (Medina)  | 1,488,782 | 3/8/2020  | 100.7 (77.6, 91.9, 110.8)   | 89.7 (72.1, 84.1, 100.5)    | -11.1 | <b>-2.1% (0.0%, -4.1%)</b>  |
| 1471 | Saudi Arabia | Najran               | 410,345   | 3/8/2020  | 64.7 (52.3, 61.0, 70.9)     | 71.2 (55.6, 63.6, 84.4)     | 6.5   | 1.6% (4.0%, -0.8%)          |
| 1472 | Saudi Arabia | Ar-Riyadh (Riyadh)   | 7,231,447 | 3/8/2020  | 224.8 (139.4, 182.6, 254.7) | 205.9 (127.1, 165.7, 252.2) | -18.9 | <b>-5.6% (-2.3%, -8.9%)</b> |
| 1473 | Saudi Arabia | Tabuk                | 657,277   | 3/8/2020  | 95.5 (69.7, 86.2, 110.1)    | 96.4 (70.9, 84.3, 102.4)    | 0.9   | <b>-4.2% (-1.5%, -6.8%)</b> |
| 1474 | Saudi Arabia | Taif                 | 688,693   | 3/8/2020  | 66.6 (53.6, 64.8, 75.3)     | 71.8 (56.9, 66.8, 84.2)     | 5.3   | -1.5% (1.0%, -4.0%)         |
| 1475 | Saudi Arabia | Thuqbah              | 343,534   | 3/8/2020  | 155.3 (106.6, 131.1, 187.2) | 135.9 (97.8, 118.6, 154.4)  | -19.4 | <b>-4.3% (-1.1%, -7.5%)</b> |
| 1476 | Saudi Arabia | Yanbu' al-Bahr       | 334,989   | 3/8/2020  | 69.4 (58.9, 67.1, 75.7)     | 69.6 (62.1, 67.4, 74.6)     | 0.3   | -1.0% (0.2%, -2.2%)         |
| 1477 | Senegal      | Dakar                | 3,140,442 | 3/14/2020 | 73.8 (56.3, 63.4, 80.7)     | 63.2 (51.1, 56.6, 63.8)     | -10.6 | -0.8% (0.8%, -2.4%)         |
| 1478 | Senegal      | Thies                | 377,286   | 3/14/2020 | 56.6 (49.3, 53.6, 60.8)     | 62.2 (51.3, 55.9, 63.1)     | 5.6   | 1.5% (4.0%, -1.0%)          |
| 1479 | Senegal      | Rufisque             | 347,295   | 3/14/2020 | 71.8 (58.3, 67.4, 78.2)     | 67.5 (53.1, 61.2, 73.1)     | -4.3  | 1.7% (4.4%, -1.0%)          |
| 1480 | Serbia       | Beograd (Belgrade)   | 1,397,939 | 1/22/2020 | 116.9 (89.7, 106.7, 127.8)  | 100.8 (79.6, 93.0, 111.9)   | -16.1 | -0.4% (0.8%, -1.6%)         |
| 1481 | Sierra Leone | Freetown             | 1,201,900 | 3/16/2020 | 52.3 (45.3, 51.0, 58.1)     | 52.5 (46.7, 52.6, 56.7)     | 0.1   | 2.1% (4.4%, -0.1%)          |
| 1482 | Singapore    | Singapore            | 5,935,053 | 1/2/2020  | 147.4 (94.5, 117.1, 170.3)  | 120.8 (80.8, 106.0, 138.3)  | -26.6 | -4.5% (1.0%, -9.7%)         |
| 1483 | Slovakia     | Bratislava           | 434,926   | 3/6/2020  | 110.1 (84.7, 96.8, 116.1)   | 91.8 (79.8, 87.6, 98.9)     | -18.3 | 0.6% (3.4%, -2.2%)          |
| 1484 | Somalia      | Merca                | 666,370   | 3/14/2020 | 34.8 (32.4, 34.9, 37.6)     | 36.9 (34.2, 36.9, 40.1)     | 2.1   | -0.5% (1.4%, -2.4%)         |
| 1485 | Somalia      | Muqdisho (Mogadishu) | 2,282,009 | 3/14/2020 | 35.8 (33.1, 35.6, 38.7)     | 37.4 (34.8, 37.3, 40.1)     | 1.6   | -0.2% (1.8%, -2.1%)         |
| 1486 | Somalia      | Berbera              | 499,396   | 3/14/2020 | 44.7 (40.1, 44.8, 49.4)     | 48.4 (45.1, 48.6, 51.7)     | 3.6   | <b>1.9% (4.0%, 0.0%)</b>    |
| 1487 | Somalia      | Hargeysa             | 988,716   | 3/14/2020 | 42.4 (37.9, 42.5, 46.7)     | 45.2 (42.4, 45.2, 47.6)     | 2.8   | -0.4% (1.4%, -2.2%)         |
| 1488 | Somalia      | Kismaayo             | 471,134   | 3/14/2020 | 34.1 (32.0, 34.0, 36.5)     | 37.0 (33.9, 37.2, 40.1)     | 2.9   | -0.6% (1.2%, -2.3%)         |

|      |              |                                     |           |           |                             |                            |      |                               |
|------|--------------|-------------------------------------|-----------|-----------|-----------------------------|----------------------------|------|-------------------------------|
| 1489 | South Africa | Bloemfontein                        | 567,029   | 1/23/2020 | 68.3 (59.8, 66.4, 73.7)     | 66.3 (54.9, 63.0, 71.3)    | -2.0 | -0.9% (0.6%, -2.4%)           |
| 1490 | South Africa | Cape Town                           | 4,617,560 | 1/23/2020 | 87.2 (66.2, 78.2, 101.0)    | 87.8 (63.9, 79.4, 102.6)   | 0.5  | <b>-3.0% (-1.2%, -4.9%)</b>   |
| 1491 | South Africa | Durban (Ethekewini)                 | 3,158,313 | 1/23/2020 | 81.2 (64.9, 74.9, 88.8)     | 85.8 (65.1, 73.9, 90.7)    | 4.6  | 0.1% (2.4%, -2.1%)            |
| 1492 | South Africa | East London (Buffalo City)          | 708,559   | 1/23/2020 | 63.2 (55.8, 61.1, 68.8)     | 61.0 (53.5, 59.9, 66.3)    | -2.3 | 1.3% (3.0%, -0.4%)            |
| 1493 | South Africa | Ekurhuleni                          | 3,894,262 | 1/23/2020 | 160.1 (99.6, 126.8, 188.0)  | 184.1 (96.3, 138.5, 232.1) | 24.1 | <b>-11.0% (-6.9%, -15.0%)</b> |
| 1494 | South Africa | Johannesburg                        | 5,782,747 | 1/23/2020 | 169.7 (102.1, 135.1, 192.9) | 193.0 (95.1, 141.9, 231.2) | 23.3 | <b>-12.9% (-8.8%, -16.8%)</b> |
| 1495 | South Africa | Pietermaritzburg (The Msunduzi)     | 526,912   | 1/23/2020 | 84.1 (68.8, 80.9, 94.3)     | 79.7 (66.9, 74.2, 90.0)    | -4.4 | -2.0% (0.3%, -4.1%)           |
| 1496 | South Africa | Polokwane                           | 425,613   | 1/23/2020 | 70.7 (56.2, 64.0, 74.8)     | 64.1 (50.9, 57.7, 64.9)    | -6.6 | -1.3% (1.2%, -3.8%)           |
| 1497 | South Africa | Port Elizabeth (Nelson Mandela Bay) | 1,253,742 | 1/23/2020 | 65.9 (58.4, 64.5, 71.2)     | 64.7 (56.0, 62.8, 70.1)    | -1.2 | -0.2% (1.4%, -1.8%)           |
| 1498 | South Africa | Pretoria                            | 2,565,660 | 1/23/2020 | 141.7 (81.2, 98.9, 140.4)   | 157.7 (73.9, 99.7, 183.2)  | 16.0 | <b>-7.3% (-2.0%, -12.4%)</b>  |
| 1499 | South Africa | Rustenburg                          | 509,368   | 1/23/2020 | 94.5 (71.1, 83.3, 101.9)    | 104.9 (65.2, 77.3, 101.5)  | 10.3 | <b>-5.1% (-1.8%, -8.3%)</b>   |

|      |              |                         |           |           |                             |                            |       |                               |
|------|--------------|-------------------------|-----------|-----------|-----------------------------|----------------------------|-------|-------------------------------|
| 1500 | South Africa | Vereeniging             | 774,031   | 1/23/2020 | 159.1 (87.3, 112.8, 183.1)  | 192.3 (80.6, 124.4, 252.7) | 33.2  | <b>-10.8% (-5.9%, -15.5%)</b> |
| 1501 | South Africa | West Rand               | 897,609   | 1/23/2020 | 102.6 (68.6, 81.1, 97.2)    | 119.8 (64.9, 81.1, 124.3)  | 17.1  | <b>-5.7% (-1.5%, -9.7%)</b>   |
| 1502 | South Africa | Witbank                 | 454,301   | 1/23/2020 | 197.9 (80.6, 113.6, 234.1)  | 201.6 (85.2, 129.7, 318.6) | 3.8   | <b>-8.2% (-2.3%, -13.7%)</b>  |
| 1503 | South Africa | Soshanguve              | 853,347   | 1/23/2020 | 98.9 (67.0, 75.9, 92.1)     | 105.9 (64.7, 74.8, 102.4)  | 7.0   | -1.8% (3.2%, -6.5%)           |
| 1504 | South Sudan  | Juba                    | 403,215   | 2/24/2020 | 53.3 (40.8, 49.2, 63.0)     | 48.6 (42.3, 48.0, 56.1)    | -4.7  | -1.4% (3.1%, -5.8%)           |
| 1505 | Spain        | Alicante                | 369,758   | 3/9/2020  | 81.5 (71.0, 80.1, 90.4)     | 73.0 (66.3, 72.8, 79.4)    | -8.5  | <b>-1.4% (-0.5%, -2.3%)</b>   |
| 1506 | Spain        | Barcelona               | 5,585,556 | 3/9/2020  | 146.7 (101.7, 128.6, 169.3) | 95.8 (79.0, 89.2, 99.5)    | -51.0 | <b>-2.7% (-0.1%, -5.2%)</b>   |
| 1507 | Spain        | Bilbao                  | 349,633   | 3/9/2020  | 84.8 (71.5, 82.6, 97.0)     | 82.3 (72.7, 77.9, 89.7)    | -2.5  | -2.6% (0.5%, -5.6%)           |
| 1508 | Spain        | Cordoba                 | 343,719   | 3/9/2020  | 78.0 (66.7, 79.2, 89.8)     | 76.5 (66.6, 76.6, 86.2)    | -1.5  | -0.3% (1.2%, -1.7%)           |
| 1509 | Spain        | Las Palmas Gran Canaria | 401,900   | 3/9/2020  | 65.4 (56.8, 64.9, 72.2)     | 67.5 (61.7, 65.8, 70.5)    | 2.1   | 0.2% (1.3%, -1.0%)            |
| 1510 | Spain        | Madrid                  | 6,617,513 | 3/9/2020  | 176.0 (101.5, 136.0, 223.0) | 115.2 (82.6, 104.5, 129.4) | -60.8 | 0.4% (5.4%, -4.4%)            |
| 1511 | Spain        | Malaga                  | 590,032   | 3/9/2020  | 88.8 (73.9, 86.0, 99.2)     | 80.8 (70.7, 79.9, 86.9)    | -8.0  | <b>-1.2% (-0.1%, -2.3%)</b>   |
| 1512 | Spain        | Murcia                  | 499,783   | 3/9/2020  | 82.5 (69.8, 81.1, 92.0)     | 76.4 (68.3, 75.8, 83.2)    | -6.1  | <b>-2.0% (-0.5%, -3.5%)</b>   |
| 1513 | Spain        | Palma                   | 467,005   | 3/9/2020  | 77.9 (65.5, 77.5, 89.5)     | 73.3 (66.2, 72.5, 80.0)    | -4.6  | -0.1% (1.6%, -1.8%)           |
| 1514 | Spain        | Sevilla                 | 703,790   | 3/9/2020  | 96.4 (75.3, 94.8, 110.0)    | 87.7 (72.4, 86.0, 99.9)    | -8.7  | 0.5% (3.6%, -2.4%)            |
| 1515 | Spain        | Valencia                | 833,724   | 3/9/2020  | 109.2 (84.3, 104.4, 124.4)  | 89.5 (75.7, 87.1, 97.4)    | -19.8 | <b>-4.7% (-3.4%, -6.0%)</b>   |
| 1516 | Spain        | Valladolid              | 305,047   | 3/9/2020  | 81.6 (63.9, 82.0, 94.2)     | 78.4 (65.2, 79.1, 87.4)    | -3.3  | -1.1% (0.7%, -2.8%)           |
| 1517 | Spain        | Vigo                    | 306,853   | 3/9/2020  | 80.3 (66.5, 81.8, 93.0)     | 79.5 (69.5, 77.5, 86.9)    | -0.8  | 0.6% (1.8%, -0.6%)            |
| 1518 | Spain        | Zaragoza                | 730,828   | 3/9/2020  | 81.3 (69.1, 81.8, 92.9)     | 78.8 (69.4, 78.2, 86.4)    | -2.5  | <b>-2.9% (-0.4%, -5.3%)</b>   |
| 1519 | Sri Lanka    | Colombo                 | 612,535   | 1/26/2020 | 67.7 (49.1, 59.4, 78.5)     | 64.0 (49.0, 55.8, 69.1)    | -3.7  | -1.7% (0.7%, -4.0%)           |

|      |                    |                             |           |           |                           |                         |       |                                |
|------|--------------------|-----------------------------|-----------|-----------|---------------------------|-------------------------|-------|--------------------------------|
| 1520 | State of Palestine | Gaza (incl. Ash Shati Camp) | 713,621   | 3/5/2020  | 100.2 (79.9, 90.0, 106.1) | 89.6 (78.1, 83.5, 93.4) | -10.6 | <b>-1.8% (-0.4%, -3.2%)</b>    |
| 1521 | Sudan              | Al Gadarif                  | 356,550   | 3/14/2020 | 51.1 (44.7, 49.6, 56.5)   | 54.7 (49.4, 53.9, 59.5) | 3.6   | <b>-1.3% (0.0%, -2.7%)</b>     |
| 1522 | Sudan              | Al Obeid (Al Ubayyid)       | 481,350   | 3/14/2020 | 52.0 (44.9, 51.1, 57.2)   | 56.3 (49.2, 54.6, 62.8) | 4.3   | -0.3% (1.6%, -2.2%)            |
| 1523 | Sudan              | Kassala                     | 364,024   | 3/14/2020 | 53.2 (46.4, 52.2, 59.1)   | 55.5 (50.1, 55.3, 60.3) | 2.3   | -1.1% (0.4%, -2.6%)            |
| 1524 | Sudan              | Al-Khartum (Khartoum)       | 5,828,858 | 3/14/2020 | 92.8 (73.2, 88.3, 106.9)  | 88.0 (74.0, 85.5, 98.6) | -4.8  | 1.3% (5.0%, -2.3%)             |
| 1525 | Sudan              | Nyala                       | 922,532   | 3/14/2020 | 52.0 (45.2, 50.3, 57.9)   | 57.5 (49.2, 56.3, 64.2) | 5.4   | 0.2% (2.5%, -2.0%)             |
| 1526 | Sudan              | Port Sudan (Bur Sudan)      | 483,510   | 3/14/2020 | 52.1 (45.1, 51.8, 59.0)   | 54.5 (49.9, 53.6, 58.3) | 2.4   | 0.0% (1.5%, -1.4%)             |
| 1527 | Sudan              | Wad Medani                  | 374,483   | 3/14/2020 | 55.0 (46.7, 53.7, 61.4)   | 59.9 (52.3, 59.8, 67.5) | 4.9   | -0.3% (1.5%, -2.1%)            |
| 1528 | Sweden             | G?eborg                     | 610,521   | 3/12/2020 | 84.5 (61.3, 79.5, 98.4)   | 82.7 (72.2, 83.1, 91.6) | -1.7  | -0.8% (14.5%, -14.1%)          |
| 1529 | Sweden             | Malmö                       | 322,379   | 3/12/2020 | 89.9 (70.2, 86.7, 101.9)  | 83.5 (74.8, 82.7, 91.0) | -6.4  | -9.0% (3.0%, -19.5%)           |
| 1530 | Sweden             | Stockholm                   | 1,632,798 | 3/12/2020 | 78.7 (61.7, 75.9, 92.0)   | 77.1 (68.2, 76.9, 85.8) | -1.6  | <b>-29.6% (-16.9%, -40.3%)</b> |
| 1531 | Switzerland        | Basel                       | 559,027   | 2/25/2020 | 101.3 (80.4, 97.8, 117.4) | 88.4 (76.0, 84.4, 98.0) | -12.9 | 3.5% (7.8%, -0.7%)             |
| 1532 | Switzerland        | Bern                        | 429,734   | 2/25/2020 | 86.7 (70.9, 86.2, 97.0)   | 78.7 (70.9, 77.4, 84.1) | -7.9  | <b>6.1% (12.6%, 0.0%)</b>      |
| 1533 | Switzerland        | Gen?e                       | 613,373   | 2/25/2020 | 100.9 (78.0, 91.7, 107.2) | 80.9 (69.8, 77.8, 88.7) | -20.0 | -4.3% (0.9%, -9.1%)            |
| 1534 | Switzerland        | Lausanne                    | 441,885   | 2/25/2020 | 94.0 (75.8, 89.3, 101.8)  | 78.7 (69.1, 77.5, 86.5) | -15.3 | 2.8% (9.2%, -3.3%)             |

|      |                      |                          |            |           |                             |                            |       |                             |
|------|----------------------|--------------------------|------------|-----------|-----------------------------|----------------------------|-------|-----------------------------|
| 1535 | Switzerland          | Zrich (Zurich)           | 1,395,356  | 2/25/2020 | 111.1 (85.3, 103.9, 129.6)  | 91.6 (78.2, 86.4, 100.0)   | -19.5 | 2.5% (7.2%, -2.0%)          |
| 1536 | Syrian Arab Republic | Al-Raqqqa                | 521,537    | 2/1/2020  | 76.7 (65.0, 75.8, 88.5)     | 75.2 (65.9, 74.9, 84.7)    | -1.5  | <b>-2.0% (0.0%, -4.0%)</b>  |
| 1537 | Syrian Arab Republic | Halab (Aleppo)           | 1,916,781  | 2/1/2020  | 96.3 (80.2, 93.1, 106.6)    | 90.2 (76.0, 87.6, 101.0)   | -6.1  | -0.9% (0.1%, -1.9%)         |
| 1538 | Syrian Arab Republic | Dimashq (Damascus)       | 2,392,045  | 2/1/2020  | 123.5 (90.9, 113.0, 146.1)  | 112.3 (89.4, 106.1, 129.4) | -11.2 | 3.6% (8.0%, -0.6%)          |
| 1539 | Syrian Arab Republic | Deir El-Zor(Deir ez-Zor) | 323,432    | 2/1/2020  | 69.4 (59.9, 68.6, 79.5)     | 69.3 (61.4, 69.8, 77.2)    | -0.1  | 1.1% (2.4%, -0.1%)          |
| 1540 | Syrian Arab Republic | Hamah                    | 921,502    | 2/1/2020  | 88.5 (74.8, 87.5, 98.6)     | 83.7 (70.5, 83.9, 95.3)    | -4.8  | 0.5% (2.7%, -1.6%)          |
| 1541 | Syrian Arab Republic | Hims (Homs)              | 1,335,804  | 2/1/2020  | 98.8 (84.6, 93.9, 106.0)    | 92.0 (78.7, 87.4, 98.9)    | -6.8  | <b>-3.4% (-2.1%, -4.6%)</b> |
| 1542 | Syrian Arab Republic | Lattakia                 | 655,714    | 2/1/2020  | 81.3 (68.5, 78.2, 89.9)     | 74.8 (66.8, 73.5, 80.8)    | -6.4  | -1.3% (0.7%, -3.2%)         |
| 1543 | Syrian Arab Republic | Al-Hasakah               | 390,947    | 2/1/2020  | 76.8 (65.6, 76.4, 87.5)     | 74.8 (63.9, 73.8, 84.3)    | -2.0  | 0.4% (2.9%, -2.0%)          |
| 1544 | Syrian Arab Republic | Tartus                   | 424,153    | 2/1/2020  | 88.7 (71.8, 82.6, 97.8)     | 81.1 (69.1, 76.4, 87.2)    | -7.6  | <b>-2.5% (-0.2%, -4.8%)</b> |
| 1545 | Tajikistan           | Dushanbe                 | 915,712    | 2/3/2020  | 83.2 (68.1, 82.7, 95.7)     | 78.1 (68.0, 76.9, 88.0)    | -5.1  | 1.4% (8.8%, -5.5%)          |
| 1546 | Thailand             | Krung Thep (Bangkok)     | 10,539,415 | 3/6/2020  | 149.0 (109.8, 134.4, 172.2) | 121.9 (91.6, 116.7, 141.9) | -27.1 | -2.4% (1.8%, -6.5%)         |
| 1547 | Thailand             | Chiang Mai               | 1,166,978  | 3/6/2020  | 71.5 (58.9, 68.4, 80.3)     | 71.6 (59.1, 69.3, 83.0)    | 0.1   | -0.6% (1.6%, -2.8%)         |

|      |          |                   |           |          |                             |                             |       |                             |
|------|----------|-------------------|-----------|----------|-----------------------------|-----------------------------|-------|-----------------------------|
| 1548 | Thailand | Chon Buri         | 1,398,645 | 3/6/2020 | 91.4 (73.2, 87.0, 105.8)    | 85.0 (71.6, 82.6, 93.1)     | -6.4  | 2.4% (6.0%, -1.1%)          |
| 1549 | Thailand | Khon-Kaen         | 502,594   | 3/6/2020 | 69.0 (56.6, 66.0, 77.6)     | 69.7 (62.2, 70.5, 77.6)     | 0.7   | -1.7% (0.4%, -3.7%)         |
| 1550 | Thailand | Nakhon Ratchasima | 774,022   | 3/6/2020 | 71.1 (59.1, 68.3, 78.8)     | 69.4 (63.0, 68.7, 78.0)     | -1.7  | 1.7% (3.7%, -0.3%)          |
| 1551 | Thailand | Nonthaburi        | 962,694   | 3/6/2020 | 146.3 (106.3, 135.6, 167.2) | 134.5 (105.3, 123.0, 152.6) | -11.8 | <b>-4.8% (-0.9%, -8.6%)</b> |
| 1552 | Thailand | Songkhla          | 966,597   | 3/6/2020 | 46.0 (38.8, 43.5, 50.3)     | 47.8 (41.3, 45.6, 53.4)     | 1.8   | 2.1% (4.8%, -0.6%)          |
| 1553 | Thailand | Ubon Ratchathani  | 495,308   | 3/6/2020 | 60.3 (51.3, 58.8, 67.3)     | 64.4 (56.7, 63.4, 70.4)     | 4.1   | 0.3% (2.0%, -1.4%)          |
| 1554 | Thailand | Samut Prakan      | 1,306,937 | 3/6/2020 | 124.0 (86.0, 109.4, 147.3)  | 92.5 (72.2, 86.3, 102.7)    | -31.5 | -3.5% (0.5%, -7.3%)         |
| 1555 | Thailand | Udon Thani        | 570,115   | 3/6/2020 | 66.6 (55.5, 63.1, 75.5)     | 67.5 (60.8, 67.8, 74.9)     | 0.8   | -0.1% (1.9%, -2.1%)         |
| 1556 | Thailand | Rayong            | 538,150   | 3/6/2020 | 72.8 (60.6, 69.1, 80.8)     | 68.1 (58.7, 64.5, 78.4)     | -4.7  | -0.1% (1.4%, -1.6%)         |
| 1557 | Thailand | Lampang           | 449,481   | 3/6/2020 | 77.7 (63.9, 74.1, 87.5)     | 75.6 (64.0, 75.0, 85.8)     | -2.2  | 2.6% (5.5%, -0.2%)          |
| 1558 | Thailand | Surat Thani       | 495,968   | 3/6/2020 | 44.8 (39.5, 44.5, 49.2)     | 47.1 (43.5, 46.1, 51.5)     | 2.4   | -0.2% (2.2%, -2.7%)         |
| 1559 | Thailand | Buri Ram          | 453,747   | 3/6/2020 | 62.4 (52.2, 61.1, 71.1)     | 67.1 (60.2, 66.5, 73.6)     | 4.7   | <b>2.4% (4.2%, 0.5%)</b>    |
| 1560 | Thailand | Chanthaburi       | 360,260   | 3/6/2020 | 55.7 (49.0, 55.1, 61.3)     | 53.9 (48.4, 53.4, 58.2)     | -1.8  | -0.6% (1.7%, -2.8%)         |
| 1561 | Thailand | Chiang Rai        | 549,966   | 3/6/2020 | 63.2 (52.2, 58.6, 68.2)     | 70.1 (55.0, 66.3, 83.6)     | 6.9   | -0.3% (2.5%, -3.0%)         |
| 1562 | Thailand | Kalasin           | 517,635   | 3/6/2020 | 62.3 (52.3, 58.5, 70.9)     | 65.5 (59.2, 65.2, 70.9)     | 3.2   | 0.6% (2.7%, -1.5%)          |
| 1563 | Thailand | Lop Buri          | 437,305   | 3/6/2020 | 77.8 (63.0, 74.0, 87.1)     | 81.4 (69.8, 79.0, 92.3)     | 3.6   | 0.7% (3.6%, -2.1%)          |
| 1564 | Thailand | Nakhon Pathom     | 503,271   | 3/6/2020 | 86.7 (69.6, 79.6, 92.4)     | 74.2 (63.9, 72.2, 79.3)     | -12.5 | <b>3.5% (7.2%, 0.0%)</b>    |



|      |                     |                          |           |           |                            |                            |       |                             |
|------|---------------------|--------------------------|-----------|-----------|----------------------------|----------------------------|-------|-----------------------------|
| 1565 | Thailand            | Pathum Thani             | 913,741   | 3/6/2020  | 129.8 (95.7, 120.7, 152.5) | 119.8 (95.3, 112.7, 134.5) | -9.9  | <b>-4.1% (-0.6%, -7.5%)</b> |
| 1566 | Thailand            | Phra Nakhon Si Ayutthaya | 441,273   | 3/6/2020  | 102.8 (79.8, 97.6, 117.4)  | 94.5 (79.4, 91.7, 105.9)   | -8.3  | -1.1% (1.8%, -4.0%)         |
| 1567 | Thailand            | Phuket                   | 432,216   | 3/6/2020  | 43.2 (39.1, 43.2, 47.7)    | 42.8 (39.1, 42.3, 46.3)    | -0.4  | 1.1% (3.2%, -0.8%)          |
| 1568 | Thailand            | Ratchaburi               | 405,530   | 3/6/2020  | 76.9 (62.9, 72.8, 85.2)    | 65.2 (58.5, 64.7, 72.0)    | -11.7 | <b>6.4% (12.1%, 1.0%)</b>   |
| 1569 | Thailand            | Roi Et                   | 440,609   | 3/6/2020  | 64.6 (52.8, 60.9, 73.4)    | 69.1 (60.8, 67.7, 76.8)    | 4.4   | 0.3% (2.4%, -1.9%)          |
| 1570 | Thailand            | Sakon Nakhon             | 381,084   | 3/6/2020  | 62.1 (51.0, 58.8, 71.5)    | 64.3 (57.2, 62.3, 70.8)    | 2.2   | -0.6% (2.1%, -3.3%)         |
| 1571 | Thailand            | Suphan Buri              | 337,631   | 3/6/2020  | 71.3 (60.8, 68.6, 78.2)    | 72.5 (66.0, 72.8, 78.4)    | 1.2   | 1.9% (4.1%, -0.2%)          |
| 1572 | Thailand            | Samut Sakhon             | 578,273   | 3/6/2020  | 102.8 (66.7, 80.5, 113.5)  | 69.4 (56.7, 65.8, 78.3)    | -33.3 | <b>-7.9% (0.0%, -15.2%)</b> |
| 1573 | Thailand            | Lamphun                  | 317,180   | 3/6/2020  | 68.0 (58.6, 65.9, 75.2)    | 69.4 (60.6, 69.6, 77.2)    | 1.3   | -1.0% (1.6%, -3.6%)         |
| 1574 | Togo                | Lomé                     | 1,827,878 | 3/16/2020 | 52.9 (45.5, 52.4, 59.5)    | 47.7 (44.1, 48.8, 52.8)    | -5.2  | 1.1% (4.2%, -1.9%)          |
| 1575 | Trinidad and Tobago | Port of Spain            | 544,207   | 1/30/2020 | 54.5 (47.1, 53.5, 61.3)    | 52.2 (45.3, 51.7, 58.0)    | -2.3  | -1.9% (1.7%, -5.4%)         |
| 1576 | Tunisia             | Safaqis                  | 630,175   | 3/4/2020  | 72.4 (61.7, 72.5, 81.6)    | 71.8 (64.9, 72.9, 78.0)    | -0.7  | -0.3% (1.2%, -1.7%)         |
| 1577 | Tunisia             | Tunis                    | 2,365,201 | 3/4/2020  | 114.4 (81.4, 102.2, 133.5) | 105.8 (83.3, 98.4, 123.9)  | -8.6  | <b>-1.7% (-0.5%, -2.7%)</b> |
| 1578 | Turkey              | Adana                    | 1,770,850 | 1/24/2020 | 103.8 (83.7, 95.9, 112.3)  | 91.1 (76.0, 86.7, 102.2)   | -12.7 | -1.5% (1.7%, -4.6%)         |
| 1579 | Turkey              | Sakarya                  | 539,445   | 1/24/2020 | 102.1 (79.4, 93.7, 114.3)  | 93.4 (75.0, 86.6, 104.7)   | -8.7  | -0.4% (3.3%, -4.0%)         |
| 1580 | Turkey              | Ankara                   | 5,117,603 | 1/24/2020 | 157.2 (96.0, 125.8, 200.6) | 118.9 (82.0, 98.7, 135.3)  | -38.3 | -3.7% (1.5%, -8.7%)         |
| 1581 | Turkey              | Antalya                  | 1,253,872 | 1/24/2020 | 88.2 (76.0, 85.7, 97.2)    | 75.0 (66.0, 75.0, 83.9)    | -13.2 | 2.5% (5.3%, -0.1%)          |
| 1582 | Turkey              | Balikesir                | 319,060   | 1/24/2020 | 96.5 (79.4, 88.9, 103.3)   | 84.9 (71.8, 81.7, 92.8)    | -11.6 | 0.7% (4.5%, -2.9%)          |
| 1583 | Turkey              | Batman                   | 437,023   | 1/24/2020 | 83.1 (72.2, 81.5, 91.8)    | 80.6 (68.4, 78.9, 88.5)    | -2.4  | -0.2% (3.4%, -3.6%)         |
| 1584 | Turkey              | Bursa                    | 1,986,268 | 1/24/2020 | 135.7 (93.8, 115.5, 156.2) | 110.9 (82.7, 97.0, 123.0)  | -24.9 | <b>-4.2% (-1.1%, -7.1%)</b> |

|      |              |               |            |           |                            |                            |       |                             |
|------|--------------|---------------|------------|-----------|----------------------------|----------------------------|-------|-----------------------------|
| 1585 | Turkey       | Denizli       | 644,782    | 1/24/2020 | 98.6 (82.4, 94.4, 109.6)   | 88.7 (71.6, 85.7, 99.3)    | -9.9  | -1.9% (1.4%, -5.0%)         |
| 1586 | Turkey       | Diyarbakir    | 1,039,492  | 1/24/2020 | 85.7 (71.5, 84.0, 95.6)    | 80.4 (68.9, 77.8, 90.4)    | -5.2  | 2.8% (6.6%, -0.8%)          |
| 1587 | Turkey       | Elazig        | 408,388    | 1/24/2020 | 84.7 (68.7, 81.3, 91.4)    | 79.3 (64.8, 78.5, 88.0)    | -5.4  | -1.0% (3.3%, -5.0%)         |
| 1588 | Turkey       | Erzurum       | 431,275    | 1/24/2020 | 77.5 (66.4, 75.4, 83.8)    | 68.3 (59.8, 68.5, 75.2)    | -9.1  | -0.4% (2.4%, -3.1%)         |
| 1589 | Turkey       | Eskisehir     | 783,669    | 1/24/2020 | 87.5 (71.6, 82.5, 95.1)    | 79.6 (69.2, 75.9, 85.1)    | -7.9  | <b>-2.4% (-1.0%, -3.9%)</b> |
| 1590 | Turkey       | Gaziantep     | 1,704,118  | 1/24/2020 | 102.1 (78.3, 95.9, 116.1)  | 90.8 (74.5, 86.0, 101.8)   | -11.3 | <b>-1.7% (-0.3%, -3.1%)</b> |
| 1591 | Turkey       | Gebze         | 744,674    | 1/24/2020 | 135.2 (90.2, 114.8, 156.8) | 119.0 (83.3, 97.5, 127.8)  | -16.3 | <b>-4.8% (-2.6%, -6.9%)</b> |
| 1592 | Turkey       | Istanbul      | 15,190,336 | 1/24/2020 | 151.0 (99.5, 126.3, 172.2) | 126.6 (86.7, 109.4, 143.3) | -24.4 | 0.1% (4.9%, -4.4%)          |
| 1593 | Turkey       | Izmir         | 2,992,953  | 1/24/2020 | 133.5 (99.6, 123.8, 154.7) | 112.5 (84.5, 108.5, 128.3) | -21.1 | -1.2% (2.8%, -5.0%)         |
| 1594 | Turkey       | Kahramanmaras | 546,688    | 1/24/2020 | 92.6 (76.0, 89.0, 101.8)   | 84.3 (67.9, 80.6, 93.6)    | -8.3  | -0.4% (3.9%, -4.4%)         |
| 1595 | Turkey       | Kayseri       | 973,506    | 1/24/2020 | 105.2 (79.7, 93.7, 114.1)  | 92.5 (73.1, 84.7, 99.0)    | -12.7 | -1.7% (3.2%, -6.3%)         |
| 1596 | Turkey       | Izmit         | 347,038    | 1/24/2020 | 121.5 (84.3, 103.7, 141.9) | 109.4 (78.0, 94.0, 125.7)  | -12.1 | -2.9% (1.3%, -7.0%)         |
| 1597 | Turkey       | Konya         | 1,328,136  | 1/24/2020 | 98.0 (77.4, 91.8, 108.7)   | 85.7 (66.4, 83.5, 97.5)    | -12.3 | 2.1% (5.6%, -1.3%)          |
| 1598 | Turkey       | Malatya       | 496,002    | 1/24/2020 | 89.3 (75.4, 86.0, 95.6)    | 83.5 (69.5, 80.2, 90.0)    | -5.7  | 0.9% (4.8%, -2.8%)          |
| 1599 | Turkey       | Manisa        | 381,190    | 1/24/2020 | 97.1 (78.6, 92.0, 105.8)   | 91.0 (75.9, 85.6, 95.7)    | -6.1  | <b>-1.8% (-0.1%, -3.5%)</b> |
| 1600 | Turkey       | Mersin        | 1,016,019  | 1/24/2020 | 101.8 (80.2, 93.0, 112.2)  | 89.7 (74.2, 84.3, 95.5)    | -12.1 | -1.2% (1.8%, -4.2%)         |
| 1601 | Turkey       | Samsun        | 642,592    | 1/24/2020 | 82.9 (72.7, 82.0, 90.5)    | 77.2 (69.2, 75.9, 82.0)    | -5.7  | -1.9% (0.9%, -4.6%)         |
| 1602 | Turkey       | Sanliurfa     | 590,522    | 1/24/2020 | 89.2 (73.9, 87.3, 101.6)   | 81.9 (68.1, 80.5, 92.8)    | -7.2  | -2.0% (1.5%, -5.4%)         |
| 1603 | Turkey       | Sivas         | 365,766    | 1/24/2020 | 74.2 (64.2, 74.3, 82.5)    | 69.5 (61.5, 69.1, 75.3)    | -4.7  | -1.8% (0.2%, -3.8%)         |
| 1604 | Turkey       | Van           | 511,391    | 1/24/2020 | 76.1 (66.0, 74.3, 82.6)    | 72.6 (63.9, 71.2, 78.8)    | -3.5  | 1.5% (5.2%, -2.0%)          |
| 1605 | Turkmenistan | Ashgabat      | 846,255    | 1/8/2020  | 105.5 (85.9, 101.7, 121.1) | 102.2 (80.9, 98.1, 116.2)  | -3.3  | -0.4% (3.6%, -4.2%)         |
| 1606 | Uganda       | Kampala       | 3,298,364  | 1/20/2020 | 51.0 (42.0, 50.8, 59.3)    | 48.8 (39.0, 46.6, 55.6)    | -2.2  | -0.5% (2.9%, -3.7%)         |
| 1607 | Ukraine      | Dnipro        | 957,345    | 3/12/2020 | 99.2 (76.2, 93.9, 109.3)   | 91.5 (78.9, 88.2, 102.9)   | -7.7  | 0.0% (1.3%, -1.4%)          |
| 1608 | Ukraine      | Donetsk       | 905,530    | 3/12/2020 | 106.7 (78.7, 95.5, 115.5)  | 95.3 (78.6, 90.3, 101.2)   | -11.4 | 2.3% (6.4%, -1.6%)          |
| 1609 | Ukraine      | Kharkiv       | 1,429,004  | 3/12/2020 | 97.7 (75.6, 93.1, 109.7)   | 88.6 (77.7, 86.3, 96.8)    | -9.0  | -0.4% (2.4%, -3.1%)         |
| 1610 | Ukraine      | Kyiv (Kiev)   | 2,988,176  | 3/12/2020 | 118.1 (86.0, 105.8, 126.1) | 104.5 (84.1, 99.6, 117.4)  | -13.6 | 1.6% (5.7%, -2.4%)          |

|      |                      |                        |           |           |                             |                             |       |                              |
|------|----------------------|------------------------|-----------|-----------|-----------------------------|-----------------------------|-------|------------------------------|
| 1611 | Ukraine              | Kryvyi Rih             | 618,706   | 3/12/2020 | 88.9 (67.5, 84.7, 102.2)    | 87.1 (74.0, 83.0, 96.5)     | -1.8  | 0.8% (3.3%, -1.6%)           |
| 1612 | Ukraine              | Luhansk                | 401,799   | 3/12/2020 | 89.6 (71.5, 84.1, 98.2)     | 84.6 (72.0, 81.7, 91.3)     | -5.0  | 1.6% (4.4%, -1.2%)           |
| 1613 | Ukraine              | Lviv                   | 723,758   | 3/12/2020 | 87.8 (71.2, 82.0, 95.6)     | 83.9 (73.5, 81.4, 90.8)     | -3.9  | 0.9% (2.2%, -0.5%)           |
| 1614 | Ukraine              | Makiivka               | 338,827   | 3/12/2020 | 104.1 (76.6, 93.8, 110.5)   | 96.4 (78.2, 88.1, 103.2)    | -7.7  | 3.5% (7.6%, -0.4%)           |
| 1615 | Ukraine              | Mariupol               | 439,509   | 3/12/2020 | 82.4 (64.1, 79.5, 92.8)     | 80.9 (69.9, 78.8, 87.2)     | -1.6  | -0.4% (2.3%, -3.0%)          |
| 1616 | Ukraine              | Mykolaiv               | 484,659   | 3/12/2020 | 75.6 (60.2, 74.6, 86.9)     | 78.7 (71.3, 77.3, 87.2)     | 3.1   | 1.5% (3.7%, -0.7%)           |
| 1617 | Ukraine              | Odesa                  | 1,009,289 | 3/12/2020 | 82.4 (67.1, 82.2, 94.5)     | 85.0 (76.6, 84.7, 91.7)     | 2.6   | -0.6% (1.4%, -2.7%)          |
| 1618 | Ukraine              | Sevastopol             | 394,676   | 3/12/2020 | 73.4 (59.5, 74.8, 87.8)     | 76.1 (69.7, 75.0, 82.8)     | 2.7   | 1.5% (3.4%, -0.4%)           |
| 1619 | Ukraine              | Simferopol             | 340,382   | 3/12/2020 | 74.4 (60.0, 74.2, 86.8)     | 76.9 (68.0, 77.0, 85.0)     | 2.5   | -1.2% (0.8%, -3.1%)          |
| 1620 | Ukraine              | Vinnitsa               | 375,311   | 3/12/2020 | 78.4 (65.8, 77.6, 87.7)     | 79.4 (71.3, 78.2, 83.7)     | 0.9   | <b>1.6% (2.6%, 0.6%)</b>     |
| 1621 | Ukraine              | Zaporizhzhya           | 736,167   | 3/12/2020 | 97.8 (74.2, 92.6, 111.3)    | 93.4 (78.8, 91.8, 100.7)    | -4.4  | 0.0% (1.9%, -1.8%)           |
| 1622 | United Arab Emirates | Abu Zaby (Abu Dhabi)   | 1,482,816 | 1/23/2020 | 107.0 (79.2, 91.3, 117.3)   | 101.8 (74.6, 88.6, 108.7)   | -5.2  | <b>-5.4% (-2.3%, -8.3%)</b>  |
| 1623 | United Arab Emirates | Ajman                  | 392,066   | 1/23/2020 | 254.7 (161.5, 220.6, 310.1) | 224.3 (146.5, 193.4, 267.6) | -30.4 | <b>-4.3% (-1.6%, -7.0%)</b>  |
| 1624 | United Arab Emirates | Al-Ain                 | 610,887   | 1/23/2020 | 85.3 (71.6, 83.5, 96.5)     | 83.0 (72.1, 80.8, 88.3)     | -2.3  | -0.7% (2.1%, -3.5%)          |
| 1625 | United Arab Emirates | Dubayy (Dubai)         | 2,878,344 | 1/23/2020 | 229.2 (129.2, 194.3, 294.4) | 202.8 (119.9, 163.4, 241.6) | -26.5 | <b>-6.6% (-2.9%, -10.2%)</b> |
| 1626 | United Arab Emirates | Ash-Shariqah (Sharjah) | 1,684,649 | 1/23/2020 | 230.7 (140.5, 205.5, 286.8) | 198.5 (126.0, 173.0, 230.6) | -32.2 | <b>-5.7% (-2.1%, -9.1%)</b>  |
| 1627 | United Kingdom       | Birkenhead             | 329,045   | 3/16/2020 | 98.1 (63.3, 88.8, 125.6)    | 106.6 (82.3, 96.4, 121.3)   | 8.5   | 0.6% (6.9%, -5.3%)           |

|      |                |                                 |           |           |                             |                             |       |                              |
|------|----------------|---------------------------------|-----------|-----------|-----------------------------|-----------------------------|-------|------------------------------|
| 1628 | United Kingdom | Birmingham (West Midlands)      | 2,607,437 | 3/16/2020 | 111.3 (73.2, 104.0, 141.0)  | 105.8 (87.0, 103.5, 123.1)  | -5.5  | 0.0% (6.0%, -5.6%)           |
| 1629 | United Kingdom | Bournemouth/Poole               | 505,687   | 3/16/2020 | 89.8 (62.0, 85.0, 107.6)    | 94.4 (80.2, 90.2, 101.9)    | 4.6   | <b>4.3% (7.7%, 1.0%)</b>     |
| 1630 | United Kingdom | Brighton-Worthing-Littlehampton | 606,909   | 3/16/2020 | 99.7 (72.1, 96.3, 119.9)    | 95.4 (81.5, 90.7, 107.5)    | -4.3  | 0.0% (3.3%, -3.2%)           |
| 1631 | United Kingdom | Bristol                         | 686,210   | 3/16/2020 | 88.6 (65.6, 85.2, 103.3)    | 91.9 (75.4, 84.7, 99.9)     | 3.3   | 2.4% (7.3%, -2.2%)           |
| 1632 | United Kingdom | Cardiff                         | 477,627   | 3/16/2020 | 87.6 (60.4, 83.0, 109.7)    | 91.4 (76.0, 89.3, 100.8)    | 3.8   | 3.3% (8.8%, -1.8%)           |
| 1633 | United Kingdom | Coventry-Bedworth               | 425,566   | 3/16/2020 | 101.0 (75.5, 96.8, 120.4)   | 101.3 (83.5, 102.2, 117.3)  | 0.3   | 2.0% (7.0%, -2.8%)           |
| 1634 | United Kingdom | Edinburgh                       | 536,775   | 3/13/2020 | 80.4 (61.3, 81.1, 99.6)     | 87.0 (74.5, 85.2, 96.6)     | 6.6   | <b>-8.4% (-3.4%, -13.2%)</b> |
| 1635 | United Kingdom | Kingston upon Hull              | 320,825   | 3/16/2020 | 108.2 (77.9, 101.9, 135.5)  | 99.3 (80.4, 95.7, 114.4)    | -8.9  | 1.1% (6.8%, -4.2%)           |
| 1636 | United Kingdom | Leicester                       | 552,178   | 3/16/2020 | 101.9 (76.6, 99.5, 121.4)   | 96.6 (81.8, 91.4, 106.8)    | -5.4  | -0.4% (4.2%, -4.8%)          |
| 1637 | United Kingdom | Liverpool                       | 901,708   | 3/16/2020 | 98.1 (63.3, 88.8, 125.6)    | 106.6 (82.3, 96.4, 121.3)   | 8.5   | 0.6% (6.9%, -5.3%)           |
| 1638 | United Kingdom | London                          | 9,304,016 | 3/16/2020 | 163.5 (110.8, 147.1, 196.7) | 136.5 (102.3, 127.7, 156.2) | -27.0 | -0.2% (4.5%, -4.7%)          |
| 1639 | United Kingdom | Manchester                      | 2,730,076 | 3/16/2020 | 125.8 (82.7, 116.5, 153.7)  | 112.7 (87.2, 102.9, 130.5)  | -13.1 | -1.7% (4.0%, -7.0%)          |
| 1640 | United Kingdom | Newport                         | 316,371   | 3/16/2020 | 88.1 (62.0, 83.7, 109.5)    | 91.4 (76.4, 86.8, 103.8)    | 3.3   | -0.1% (4.3%, -4.4%)          |
| 1641 | United Kingdom | Nottingham                      | 787,610   | 3/16/2020 | 110.6 (80.1, 104.6, 131.6)  | 99.8 (84.0, 95.9, 109.8)    | -10.8 | -2.2% (2.8%, -7.0%)          |
| 1642 | United Kingdom | Preston                         | 328,158   | 3/16/2020 | 93.4 (65.6, 85.8, 113.9)    | 96.4 (78.8, 88.1, 111.0)    | 3.0   | -0.4% (4.4%, -4.9%)          |
| 1643 | United Kingdom | Reading-Wokingham               | 342,117   | 3/16/2020 | 113.8 (78.0, 100.2, 137.8)  | 104.5 (83.1, 93.9, 117.4)   | -9.3  | 2.4% (7.8%, -2.9%)           |

|      |                                |                                             |           |           |                            |                            |       |                     |
|------|--------------------------------|---------------------------------------------|-----------|-----------|----------------------------|----------------------------|-------|---------------------|
| 1644 | United Kingdom                 | Sheffield                                   | 730,158   | 3/16/2020 | 114.0 (83.5, 106.9, 138.6) | 105.4 (84.4, 101.6, 119.4) | -8.6  | -1.8% (6.2%, -9.2%) |
| 1645 | United Kingdom                 | Southampton/Portsmouth<br>(South Hampshire) | 927,916   | 3/16/2020 | 104.0 (72.1, 94.3, 130.2)  | 108.2 (85.5, 101.6, 122.4) | 4.2   | 2.2% (5.8%, -1.3%)  |
| 1646 | United Kingdom                 | Southend-On-Sea                             | 312,328   | 3/16/2020 | 130.9 (99.0, 121.3, 153.1) | 112.9 (88.0, 110.2, 129.9) | -18.0 | -1.9% (2.1%, -5.8%) |
| 1647 | United Kingdom                 | Sunderland                                  | 341,366   | 3/16/2020 | 89.0 (64.7, 86.9, 111.9)   | 90.2 (74.7, 86.6, 102.0)   | 1.2   | 1.6% (7.5%, -4.0%)  |
| 1648 | United Kingdom                 | Swansea                                     | 311,408   | 3/16/2020 | 78.0 (53.1, 73.9, 99.2)    | 90.0 (72.9, 81.6, 100.6)   | 12.0  | 0.8% (5.3%, -3.5%)  |
| 1649 | United Kingdom                 | Teeside (Middlesbrough)                     | 387,392   | 3/16/2020 | 92.7 (68.6, 88.9, 116.9)   | 96.3 (79.8, 92.2, 107.5)   | 3.6   | 0.4% (6.7%, -5.6%)  |
| 1650 | United Kingdom                 | Stoke-on-Trent (The<br>Potteries)           | 386,013   | 3/16/2020 | 98.3 (70.8, 94.0, 122.2)   | 98.7 (79.0, 91.8, 110.1)   | 0.4   | 0.0% (5.1%, -4.8%)  |
| 1651 | United Kingdom                 | Newcastle upon Tyne                         | 809,481   | 3/16/2020 | 88.0 (63.2, 83.0, 111.9)   | 88.9 (74.2, 83.5, 101.4)   | 0.9   | -2.1% (3.5%, -7.4%) |
| 1652 | United Kingdom                 | West Yorkshire                              | 1,889,095 | 3/16/2020 | 108.3 (72.1, 100.3, 134.2) | 103.1 (83.7, 96.9, 120.7)  | -5.3  | -2.8% (2.0%, -7.4%) |
| 1653 | United Kingdom                 | Glasgow                                     | 1,673,332 | 3/13/2020 | 82.1 (59.8, 81.7, 102.8)   | 85.5 (72.2, 80.8, 94.2)    | 3.3   | -4.2% (0.9%, -9.0%) |
| 1654 | United Kingdom                 | Belfast                                     | 630,632   | 3/16/2020 | 69.4 (47.9, 70.2, 87.3)    | 86.1 (71.5, 81.1, 95.8)    | 16.7  | 0.0% (5.7%, -5.4%)  |
| 1655 | United Republic<br>of Tanzania | Arusha                                      | 492,919   | 1/30/2020 | 37.6 (33.4, 37.6, 42.2)    | 36.1 (30.6, 34.8, 41.7)    | -1.4  | -2.5% (0.4%, -5.3%) |
| 1656 | United Republic<br>of Tanzania | Dar es Salaam                               | 6,701,650 | 1/30/2020 | 43.2 (38.7, 42.9, 47.6)    | 45.2 (39.1, 44.4, 49.9)    | 2.0   | -2.1% (0.2%, -4.3%) |

|      |                             |                         |           |           |                            |                           |       |                              |
|------|-----------------------------|-------------------------|-----------|-----------|----------------------------|---------------------------|-------|------------------------------|
| 1657 | United Republic of Tanzania | Mbeya                   | 566,065   | 1/30/2020 | 42.8 (36.2, 40.4, 49.4)    | 39.7 (34.0, 37.8, 45.8)   | -3.1  | 1.7% (6.2%, -2.5%)           |
| 1658 | United Republic of Tanzania | Morogoro                | 408,740   | 1/30/2020 | 39.8 (35.4, 39.2, 42.9)    | 40.6 (34.6, 39.0, 43.3)   | 0.8   | -1.3% (1.5%, -3.9%)          |
| 1659 | United Republic of Tanzania | Mwanza                  | 1,120,430 | 1/30/2020 | 43.2 (38.9, 43.6, 48.2)    | 41.3 (35.2, 40.2, 47.4)   | -2.0  | -1.0% (1.9%, -3.8%)          |
| 1660 | United Republic of Tanzania | Zanzibar                | 705,078   | 1/30/2020 | 39.7 (36.6, 40.3, 44.0)    | 40.1 (35.5, 40.9, 46.6)   | 0.4   | <b>-5.0% (-2.4%, -7.5%)</b>  |
| 1661 | United Republic of Tanzania | Songea                  | 352,781   | 1/30/2020 | 44.2 (36.2, 40.2, 47.0)    | 38.3 (35.1, 38.3, 41.2)   | -5.9  | 1.3% (4.6%, -1.9%)           |
| 1662 | United States of America    | Akron                   | 565,110   | 2/2/2020  | 104.1 (75.4, 89.3, 108.2)  | 95.5 (75.0, 88.5, 108.4)  | -8.6  | <b>-8.4% (-0.8%, -15.5%)</b> |
| 1663 | United States of America    | Albany                  | 629,609   | 1/17/2020 | 93.1 (69.3, 81.9, 99.4)    | 86.3 (68.9, 80.3, 94.0)   | -6.8  | -0.3% (6.8%, -7.0%)          |
| 1664 | United States of America    | Albuquerque             | 914,749   | 2/2/2020  | 79.9 (68.0, 79.0, 89.9)    | 76.4 (67.7, 75.5, 83.9)   | -3.5  | -1.0% (0.4%, -2.4%)          |
| 1665 | United States of America    | Allentown-Bethlehem     | 762,561   | 2/2/2020  | 116.4 (79.9, 97.2, 129.5)  | 101.6 (79.9, 91.6, 108.7) | -14.8 | 0.0% (7.7%, -7.1%)           |
| 1666 | United States of America    | Ann Arbor               | 327,984   | 1/1/2020  | 112.3 (73.7, 90.6, 116.2)  | 88.2 (67.7, 82.2, 98.3)   | -24.1 | -2.8% (5.2%, -10.2%)         |
| 1667 | United States of America    | Antioch                 | 352,830   | 1/17/2020 | 95.9 (78.8, 90.4, 100.9)   | 85.0 (76.7, 83.8, 91.3)   | -10.9 | 0.0% (1.6%, -1.6%)           |
| 1668 | United States of America    | Asheville               | 354,028   | 2/2/2020  | 80.7 (66.1, 76.3, 88.1)    | 77.0 (67.2, 74.5, 83.2)   | -3.8  | -2.1% (1.2%, -5.2%)          |
| 1669 | United States of America    | Atlanta                 | 5,803,065 | 2/2/2020  | 109.3 (85.7, 101.1, 121.1) | 94.1 (78.5, 88.6, 105.6)  | -15.3 | -1.4% (1.1%, -3.8%)          |
| 1670 | United States of America    | Augusta-Richmond County | 443,502   | 2/2/2020  | 80.4 (68.9, 78.7, 87.9)    | 77.3 (67.0, 75.3, 84.1)   | -3.1  | 0.3% (4.1%, -3.4%)           |

|      |                          |                             |           |           |                             |                             |       |                              |
|------|--------------------------|-----------------------------|-----------|-----------|-----------------------------|-----------------------------|-------|------------------------------|
| 1671 | United States of America | Austin                      | 2,053,309 | 1/28/2020 | 84.9 (71.8, 80.8, 94.4)     | 78.7 (69.7, 77.8, 85.8)     | -6.3  | 0.8% (3.0%, -1.4%)           |
| 1672 | United States of America | Bakersfield                 | 690,619   | 1/17/2020 | 99.6 (83.2, 94.3, 109.3)    | 91.9 (80.0, 87.7, 98.3)     | -7.7  | <b>-2.4% (-0.2%, -4.5%)</b>  |
| 1673 | United States of America | Baltimore                   | 2,325,087 | 2/2/2020  | 134.2 (94.7, 114.0, 147.6)  | 113.4 (85.5, 102.7, 120.0)  | -20.7 | -1.1% (3.2%, -5.2%)          |
| 1674 | United States of America | Baton Rouge                 | 734,194   | 2/2/2020  | 87.6 (69.3, 83.7, 96.6)     | 81.9 (68.3, 78.5, 91.0)     | -5.7  | <b>-5.5% (-0.8%, -10.0%)</b> |
| 1675 | United States of America | Birmingham                  | 842,065   | 2/2/2020  | 93.5 (75.0, 86.4, 101.3)    | 88.1 (74.4, 83.8, 95.5)     | -5.5  | 0.1% (1.9%, -1.7%)           |
| 1676 | United States of America | Boise City                  | 446,756   | 2/2/2020  | 74.0 (61.3, 75.5, 86.2)     | 73.9 (63.8, 74.8, 83.0)     | -0.1  | 1.2% (5.9%, -3.3%)           |
| 1677 | United States of America | Boston                      | 4,308,634 | 2/2/2020  | 117.0 (84.9, 104.7, 136.8)  | 102.2 (80.7, 95.5, 110.8)   | -14.8 | -5.0% (1.7%, -11.2%)         |
| 1678 | United States of America | Bridgeport-Stamford         | 953,244   | 2/2/2020  | 121.2 (83.9, 103.9, 133.3)  | 103.3 (82.0, 94.7, 116.2)   | -17.9 | 1.1% (3.1%, -0.9%)           |
| 1679 | United States of America | Buffalo                     | 890,641   | 1/17/2020 | 104.6 (75.5, 89.1, 114.0)   | 93.4 (76.1, 85.7, 104.9)    | -11.2 | -3.2% (3.5%, -9.5%)          |
| 1680 | United States of America | Charleston-North Charleston | 707,563   | 2/2/2020  | 80.6 (67.3, 78.5, 90.1)     | 76.7 (66.9, 75.8, 82.9)     | -3.9  | <b>-3.4% (-1.1%, -5.7%)</b>  |
| 1681 | United States of America | Charlotte                   | 2,054,065 | 2/2/2020  | 101.1 (81.2, 94.6, 112.8)   | 86.4 (74.5, 83.5, 95.0)     | -14.7 | <b>-3.9% (-1.1%, -6.6%)</b>  |
| 1682 | United States of America | Chattanooga                 | 420,544   | 2/2/2020  | 90.9 (71.0, 82.5, 97.3)     | 81.4 (68.9, 78.6, 87.8)     | -9.5  | -1.4% (1.1%, -3.8%)          |
| 1683 | United States of America | Chicago                     | 8,865,009 | 2/2/2020  | 169.5 (110.2, 147.9, 194.7) | 143.2 (104.1, 129.6, 163.1) | -26.3 | -3.2% (1.9%, -8.0%)          |

|      |                          |                           |           |           |                            |                            |       |                               |
|------|--------------------------|---------------------------|-----------|-----------|----------------------------|----------------------------|-------|-------------------------------|
| 1684 | United States of America | Cincinnati                | 1,746,265 | 2/2/2020  | 123.5 (86.1, 104.3, 135.8) | 103.4 (84.4, 95.8, 115.6)  | -20.1 | <b>2.4% (4.3%, 0.5%)</b>      |
| 1685 | United States of America | Cleveland                 | 1,763,209 | 2/2/2020  | 114.3 (80.4, 100.7, 125.9) | 106.5 (81.1, 97.3, 118.6)  | -7.8  | -6.2% (2.9%, -14.5%)          |
| 1686 | United States of America | Colorado Springs          | 668,270   | 2/2/2020  | 98.8 (75.0, 87.9, 107.7)   | 82.7 (69.1, 78.3, 87.5)    | -16.1 | <b>-8.5% (-3.8%, -13.0%)</b>  |
| 1687 | United States of America | Columbia, South Carolina  | 716,040   | 2/2/2020  | 84.7 (72.3, 82.2, 91.2)    | 79.5 (69.8, 78.0, 85.5)    | -5.1  | 0.5% (1.9%, -1.0%)            |
| 1688 | United States of America | Columbus, Ohio            | 1,644,020 | 2/2/2020  | 109.4 (79.2, 93.1, 113.8)  | 97.1 (80.5, 91.6, 107.1)   | -12.3 | -4.6% (3.3%, -11.9%)          |
| 1689 | United States of America | Corpus Christi            | 346,589   | 1/28/2020 | 69.5 (58.9, 67.2, 75.6)    | 68.9 (59.7, 65.9, 74.9)    | -0.6  | 0.0% (1.9%, -2.0%)            |
| 1690 | United States of America | Dallas-Fort Worth         | 6,300,661 | 1/28/2020 | 102.0 (79.9, 90.3, 108.6)  | 90.9 (77.4, 86.9, 97.0)    | -11.1 | -1.0% (0.9%, -2.9%)           |
| 1691 | United States of America | Dayton                    | 740,751   | 2/2/2020  | 106.2 (74.5, 91.1, 113.7)  | 95.3 (77.7, 90.9, 107.1)   | -11.0 | <b>-11.8% (-3.6%, -19.2%)</b> |
| 1692 | United States of America | Daytona Beach-Port Orange | 475,592   | 2/2/2020  | 70.8 (57.9, 68.8, 79.8)    | 73.3 (63.5, 70.8, 80.5)    | 2.6   | -1.4% (0.8%, -3.6%)           |
| 1693 | United States of America | Denver-Aurora             | 2,826,679 | 2/2/2020  | 143.8 (92.6, 116.5, 153.4) | 113.8 (84.5, 100.5, 122.8) | -30.1 | <b>-4.5% (-0.2%, -8.7%)</b>   |
| 1694 | United States of America | Des Moines                | 544,267   | 2/2/2020  | 85.5 (63.7, 79.0, 94.8)    | 80.2 (66.2, 78.5, 89.4)    | -5.3  | -1.4% (4.6%, -7.1%)           |
| 1695 | United States of America | Detroit                   | 3,547,509 | 1/1/2020  | 149.6 (91.0, 117.3, 159.9) | 117.7 (87.6, 103.4, 136.3) | -31.9 | -7.4% (0.5%, -14.8%)          |
| 1696 | United States of America | Durham                    | 417,924   | 2/2/2020  | 88.6 (73.0, 84.1, 96.9)    | 82.3 (70.8, 79.1, 88.0)    | -6.3  | -1.0% (1.5%, -3.4%)           |



|      |                          |                         |         |           |                            |                           |       |                               |
|------|--------------------------|-------------------------|---------|-----------|----------------------------|---------------------------|-------|-------------------------------|
| 1697 | United States of America | El Paso                 | 951,270 | 1/28/2020 | 111.0 (82.7, 100.1, 125.0) | 103.8 (84.6, 94.0, 118.7) | -7.2  | <b>-3.1% (-1.0%, -5.2%)</b>   |
| 1698 | United States of America | Fayetteville            | 346,517 | 2/2/2020  | 80.4 (69.0, 78.4, 89.8)    | 78.8 (68.4, 75.9, 85.8)   | -1.5  | -1.7% (0.7%, -4.0%)           |
| 1699 | United States of America | Fayetteville-Springdale | 504,003 | 2/2/2020  | 72.9 (59.5, 69.5, 79.0)    | 74.0 (64.5, 72.2, 81.4)   | 1.1   | -0.5% (3.8%, -4.7%)           |
| 1700 | United States of America | Flint                   | 345,232 | 1/1/2020  | 107.9 (67.7, 84.5, 111.1)  | 83.0 (63.7, 77.4, 97.9)   | -24.9 | <b>-10.8% (-2.4%, -18.5%)</b> |
| 1701 | United States of America | Fort Collins            | 336,939 | 2/2/2020  | 95.3 (71.0, 85.5, 102.7)   | 83.0 (68.7, 78.5, 90.1)   | -12.3 | -3.2% (0.7%, -6.9%)           |
| 1702 | United States of America | Cape Coral              | 851,360 | 2/2/2020  | 67.2 (57.6, 64.7, 73.8)    | 68.5 (59.0, 65.8, 75.0)   | 1.3   | 0.2% (2.4%, -2.0%)            |
| 1703 | United States of America | Fort Wayne              | 339,621 | 2/2/2020  | 98.3 (72.8, 84.3, 103.1)   | 91.4 (74.2, 85.5, 100.8)  | -6.9  | -5.6% (0.9%, -11.8%)          |
| 1704 | United States of America | Fresno                  | 768,549 | 1/17/2020 | 97.0 (81.0, 95.2, 106.3)   | 92.9 (77.1, 90.6, 100.0)  | -4.2  | <b>-6.9% (-4.3%, -9.5%)</b>   |
| 1705 | United States of America | Grand Rapids            | 599,003 | 1/1/2020  | 98.2 (71.7, 86.1, 106.3)   | 85.2 (67.5, 81.6, 93.1)   | -13.1 | <b>-8.3% (-0.6%, -15.4%)</b>  |
| 1706 | United States of America | Greensboro              | 361,153 | 2/2/2020  | 92.3 (74.0, 85.7, 99.0)    | 83.6 (70.1, 78.9, 89.8)   | -8.7  | <b>-3.8% (-0.6%, -6.8%)</b>   |
| 1707 | United States of America | Greenville              | 528,845 | 2/2/2020  | 87.6 (73.4, 82.3, 93.5)    | 78.2 (67.2, 74.6, 83.0)   | -9.4  | 0.9% (3.7%, -1.9%)            |
| 1708 | United States of America | Harrisburg              | 542,165 | 2/2/2020  | 115.3 (80.7, 95.6, 125.3)  | 96.3 (78.5, 87.4, 103.0)  | -19.0 | -2.3% (4.7%, -8.9%)           |
| 1709 | United States of America | Hartford                | 998,852 | 2/2/2020  | 105.0 (76.1, 89.3, 111.8)  | 91.5 (74.3, 87.3, 99.5)   | -13.4 | 1.0% (9.8%, -7.2%)            |

|      |                          |                                   |           |           |                            |                           |       |                             |
|------|--------------------------|-----------------------------------|-----------|-----------|----------------------------|---------------------------|-------|-----------------------------|
| 1710 | United States of America | Victorville-Hesperia-Apple Valley | 537,446   | 1/17/2020 | 93.7 (78.8, 93.4, 106.0)   | 88.8 (78.4, 86.8, 97.8)   | -4.9  | -0.9% (0.5%, -2.2%)         |
| 1711 | United States of America | Honolulu                          | 891,839   | 2/2/2020  | 51.9 (45.5, 51.4, 57.3)    | 50.8 (47.7, 50.8, 54.1)   | -1.1  | -0.9% (1.3%, -2.9%)         |
| 1712 | United States of America | Houston                           | 6,370,704 | 1/28/2020 | 119.6 (88.0, 105.5, 133.6) | 105.2 (83.9, 98.7, 121.6) | -14.3 | -1.9% (0.4%, -4.1%)         |
| 1713 | United States of America | Huntsville                        | 384,082   | 2/2/2020  | 80.5 (64.6, 74.4, 85.0)    | 78.0 (66.1, 72.6, 81.0)   | -2.5  | 0.9% (2.7%, -0.9%)          |
| 1714 | United States of America | Indianapolis                      | 1,807,149 | 2/2/2020  | 107.5 (80.3, 95.1, 116.9)  | 95.3 (77.9, 91.0, 107.9)  | -12.2 | -1.5% (3.3%, -6.0%)         |
| 1715 | United States of America | Jackson, Mississippi              | 420,208   | 2/2/2020  | 73.1 (61.7, 70.5, 79.0)    | 72.7 (64.3, 71.3, 79.3)   | -0.4  | 0.3% (4.7%, -3.9%)          |
| 1716 | United States of America | Jacksonville, Florida             | 1,280,209 | 2/2/2020  | 83.5 (66.2, 81.2, 95.6)    | 80.4 (68.7, 79.5, 89.0)   | -3.2  | <b>-2.6% (-0.2%, -4.8%)</b> |
| 1717 | United States of America | Concord                           | 401,258   | 1/17/2020 | 96.3 (75.8, 87.8, 101.2)   | 84.3 (72.6, 81.7, 93.9)   | -12.1 | <b>-5.4% (-2.0%, -8.6%)</b> |
| 1718 | United States of America | Kansas City                       | 1,686,280 | 2/2/2020  | 104.4 (76.3, 95.4, 110.9)  | 96.5 (78.5, 90.3, 106.0)  | -7.8  | 0.2% (2.6%, -2.2%)          |
| 1719 | United States of America | Knoxville                         | 740,838   | 2/2/2020  | 90.3 (74.6, 83.4, 96.5)    | 80.2 (68.3, 77.0, 86.3)   | -10.1 | -1.3% (0.8%, -3.4%)         |
| 1720 | United States of America | Lafayette                         | 357,602   | 2/2/2020  | 73.4 (63.1, 70.9, 78.0)    | 73.0 (60.3, 70.2, 79.0)   | -0.3  | <b>-3.7% (-0.5%, -6.7%)</b> |
| 1721 | United States of America | Lakeland                          | 344,399   | 2/2/2020  | 79.0 (67.1, 76.2, 86.5)    | 78.1 (69.1, 76.0, 86.8)   | -0.9  | 0.8% (3.3%, -1.6%)          |
| 1722 | United States of America | Lancaster                         | 497,341   | 2/2/2020  | 116.7 (82.8, 97.6, 122.5)  | 93.8 (77.2, 85.4, 101.3)  | -22.9 | -2.7% (3.8%, -8.7%)         |

|      |                          |                                  |            |           |                             |                             |       |                             |
|------|--------------------------|----------------------------------|------------|-----------|-----------------------------|-----------------------------|-------|-----------------------------|
| 1723 | United States of America | Lancaster-Palmdale               | 490,880    | 1/17/2020 | 84.9 (69.9, 79.4, 91.0)     | 77.1 (69.9, 76.2, 82.5)     | -7.9  | 0.3% (1.6%, -1.1%)          |
| 1724 | United States of America | Lansing                          | 325,668    | 1/1/2020  | 99.1 (69.4, 86.0, 104.2)    | 81.2 (66.4, 79.1, 90.2)     | -17.9 | -2.2% (5.6%, -9.5%)         |
| 1725 | United States of America | Laredo                           | 315,374    | 1/28/2020 | 75.4 (63.7, 72.7, 82.1)     | 72.0 (65.5, 70.4, 76.6)     | -3.4  | -0.2% (1.9%, -2.3%)         |
| 1726 | United States of America | Las Vegas                        | 2,698,684  | 2/2/2020  | 114.8 (90.9, 104.4, 126.9)  | 98.3 (81.7, 90.3, 104.1)    | -16.5 | -2.0% (1.7%, -5.7%)         |
| 1727 | United States of America | Denton-Lewisville                | 445,221    | 1/28/2020 | 114.4 (84.9, 100.1, 118.4)  | 96.9 (81.8, 91.1, 105.0)    | -17.6 | <b>-4.1% (-0.4%, -7.6%)</b> |
| 1728 | United States of America | Lexington-Fayette                | 333,999    | 2/2/2020  | 92.2 (71.1, 82.6, 97.7)     | 83.2 (71.2, 79.4, 88.7)     | -9.0  | -2.6% (2.4%, -7.4%)         |
| 1729 | United States of America | Little Rock                      | 514,062    | 2/2/2020  | 83.9 (67.2, 76.9, 87.7)     | 80.7 (67.5, 76.2, 86.2)     | -3.2  | 1.0% (5.3%, -3.2%)          |
| 1730 | United States of America | Los Angeles-Long Beach-Santa Ana | 12,446,597 | 1/17/2020 | 246.0 (155.3, 211.2, 297.3) | 202.7 (120.4, 152.3, 248.1) | -43.2 | 5.9% (12.6%, -0.5%)         |
| 1731 | United States of America | Louisville                       | 1,089,499  | 2/2/2020  | 114.7 (86.2, 102.0, 124.1)  | 101.8 (81.5, 95.9, 110.8)   | -12.9 | -0.4% (3.4%, -4.0%)         |
| 1732 | United States of America | Madison                          | 487,389    | 2/2/2020  | 92.8 (62.6, 79.0, 99.8)     | 84.4 (65.8, 83.0, 94.7)     | -8.4  | 3.2% (10.2%, -3.4%)         |
| 1733 | United States of America | McAllen                          | 1,012,214  | 1/28/2020 | 69.9 (60.8, 68.3, 76.3)     | 68.2 (60.2, 67.3, 73.3)     | -1.6  | 0.2% (1.8%, -1.4%)          |
| 1734 | United States of America | Palm Bay-Melbourne               | 518,673    | 2/2/2020  | 68.1 (57.3, 67.0, 76.3)     | 70.1 (61.3, 69.0, 75.6)     | 2.1   | -0.3% (2.2%, -2.7%)         |

|      |                          |                       |            |           |                             |                             |       |                              |
|------|--------------------------|-----------------------|------------|-----------|-----------------------------|-----------------------------|-------|------------------------------|
| 1735 | United States of America | Memphis               | 1,149,542  | 2/2/2020  | 92.6 (74.2, 85.4, 99.3)     | 83.3 (71.2, 83.0, 95.9)     | -9.3  | -0.5% (5.3%, -5.9%)          |
| 1736 | United States of America | Miami                 | 6,122,134  | 2/2/2020  | 80.8 (65.1, 76.9, 92.6)     | 78.8 (65.4, 74.9, 86.7)     | -2.0  | 1.0% (3.4%, -1.5%)           |
| 1737 | United States of America | Milwaukee             | 1,438,923  | 2/2/2020  | 117.0 (76.1, 97.2, 134.9)   | 99.8 (76.3, 93.3, 114.0)    | -17.2 | -5.0% (1.9%, -11.4%)         |
| 1738 | United States of America | Minneapolis-St. Paul  | 2,926,094  | 1/29/2020 | 118.1 (76.9, 97.1, 125.3)   | 104.5 (82.0, 96.9, 112.6)   | -13.6 | 3.2% (8.5%, -1.8%)           |
| 1739 | United States of America | Mobile                | 332,921    | 2/2/2020  | 76.5 (64.8, 75.1, 85.0)     | 75.5 (63.6, 73.2, 82.4)     | -1.0  | 1.7% (5.5%, -2.0%)           |
| 1740 | United States of America | Modesto               | 410,501    | 1/17/2020 | 96.4 (80.8, 94.5, 106.7)    | 90.6 (79.7, 88.9, 98.3)     | -5.9  | <b>-2.1% (0.0%, -4.1%)</b>   |
| 1741 | United States of America | Montgomery            | 352,496    | 2/2/2020  | 74.8 (65.2, 73.4, 82.5)     | 73.7 (64.5, 71.4, 78.0)     | -1.1  | <b>-2.5% (-0.5%, -4.4%)</b>  |
| 1742 | United States of America | Bonita Springs-Naples | 433,860    | 2/2/2020  | 65.2 (56.6, 63.3, 71.7)     | 65.6 (57.5, 64.4, 71.8)     | 0.4   | -0.8% (1.0%, -2.5%)          |
| 1743 | United States of America | Nashville-Davidson    | 1,248,729  | 2/2/2020  | 95.7 (76.5, 89.0, 106.4)    | 86.7 (73.8, 82.4, 94.8)     | -9.0  | <b>2.4% (4.0%, 0.9%)</b>     |
| 1744 | United States of America | New Haven             | 592,734    | 2/2/2020  | 114.4 (82.1, 97.5, 125.1)   | 98.1 (77.6, 90.4, 104.9)    | -16.3 | 0.5% (2.3%, -1.3%)           |
| 1745 | United States of America | New Orleans           | 991,754    | 2/2/2020  | 87.9 (69.5, 81.5, 100.1)    | 88.3 (68.5, 79.5, 93.8)     | 0.4   | 0.5% (6.0%, -4.8%)           |
| 1746 | United States of America | New York-Newark       | 18,803,552 | 1/17/2020 | 229.7 (137.4, 187.5, 273.5) | 192.5 (123.6, 155.8, 218.7) | -37.2 | -0.8% (4.7%, -6.1%)          |
| 1747 | United States of America | Virginia Beach        | 1,477,248  | 2/2/2020  | 86.1 (69.3, 82.8, 95.9)     | 82.5 (71.5, 79.9, 91.1)     | -3.6  | <b>-3.5% (-0.9%, -6.0%)</b>  |
| 1748 | United States of America | Ogden-Layton          | 710,695    | 2/2/2020  | 108.4 (74.6, 87.8, 115.5)   | 89.4 (72.4, 81.1, 94.1)     | -18.9 | <b>-7.5% (-1.1%, -13.5%)</b> |

|      |                          |                                   |           |           |                             |                            |       |                            |
|------|--------------------------|-----------------------------------|-----------|-----------|-----------------------------|----------------------------|-------|----------------------------|
| 1749 | United States of America | Oklahoma City                     | 988,577   | 2/2/2020  | 89.3 (72.1, 84.3, 95.6)     | 84.3 (74.5, 80.8, 92.0)    | -5.0  | -1.0% (1.8%, -3.7%)        |
| 1750 | United States of America | Omaha                             | 834,661   | 2/2/2020  | 92.7 (68.0, 87.2, 104.4)    | 89.0 (71.4, 87.9, 100.5)   | -3.8  | -3.9% (1.0%, -8.6%)        |
| 1751 | United States of America | Orlando                           | 1,963,879 | 2/2/2020  | 85.1 (70.1, 83.0, 97.1)     | 82.2 (71.6, 80.2, 90.2)    | -2.9  | -3.1% (0.2%, -6.3%)        |
| 1752 | United States of America | Oxnard                            | 397,301   | 1/17/2020 | 93.3 (75.3, 83.6, 97.4)     | 83.8 (70.8, 77.5, 87.6)    | -9.5  | -2.5% (0.3%, -5.1%)        |
| 1753 | United States of America | Indio-Cathedral City-Palm Springs | 467,017   | 1/17/2020 | 84.9 (74.0, 84.5, 92.9)     | 82.7 (74.4, 82.0, 89.3)    | -2.2  | 0.9% (2.6%, -0.8%)         |
| 1754 | United States of America | Pensacola                         | 355,041   | 2/2/2020  | 69.7 (60.1, 68.5, 78.1)     | 67.2 (58.5, 67.6, 74.0)    | -2.5  | -1.5% (0.9%, -3.9%)        |
| 1755 | United States of America | Philadelphia                      | 5,716,764 | 2/2/2020  | 152.6 (103.9, 127.9, 171.7) | 121.3 (90.5, 109.9, 137.3) | -31.4 | -0.6% (3.6%, -4.6%)        |
| 1756 | United States of America | Phoenix-Mesa                      | 4,511,420 | 2/2/2020  | 137.1 (104.3, 126.2, 158.2) | 125.0 (94.9, 117.6, 145.0) | -12.2 | -0.9% (0.9%, -2.6%)        |
| 1757 | United States of America | Pittsburgh                        | 1,703,526 | 2/2/2020  | 121.9 (84.4, 100.9, 130.8)  | 100.8 (80.0, 91.3, 113.3)  | -21.1 | -4.1% (2.3%, -10.2%)       |
| 1758 | United States of America | Portland                          | 2,151,050 | 2/2/2020  | 105.1 (75.3, 96.7, 125.0)   | 94.3 (74.5, 88.4, 105.6)   | -10.8 | <b>-5.0% (0.0%, -9.6%)</b> |
| 1759 | United States of America | Poughkeepsie-Newburgh             | 507,368   | 1/17/2020 | 96.7 (71.1, 84.8, 104.6)    | 90.7 (68.8, 81.0, 94.6)    | -6.0  | -2.4% (2.4%, -6.9%)        |
| 1760 | United States of America | Providence                        | 1,199,970 | 2/2/2020  | 99.3 (76.4, 92.1, 110.6)    | 94.0 (76.3, 90.9, 105.8)   | -5.3  | -0.5% (5.5%, -6.2%)        |
| 1761 | United States of America | Provo-Orem                        | 766,268   | 2/2/2020  | 86.1 (69.2, 79.7, 93.7)     | 77.1 (67.2, 76.2, 82.6)    | -9.0  | -2.3% (1.6%, -6.0%)        |

|      |                          |                                    |           |           |                             |                            |       |                              |
|------|--------------------------|------------------------------------|-----------|-----------|-----------------------------|----------------------------|-------|------------------------------|
| 1762 | United States of America | Raleigh                            | 1,443,805 | 2/2/2020  | 89.0 (74.5, 84.4, 98.6)     | 83.1 (71.1, 78.8, 89.3)    | -6.0  | -1.8% (0.4%, -4.0%)          |
| 1763 | United States of America | Reno                               | 504,393   | 2/2/2020  | 89.3 (69.5, 83.1, 97.4)     | 80.3 (68.1, 77.8, 88.6)    | -9.0  | <b>-3.0% (-1.1%, -4.9%)</b>  |
| 1764 | United States of America | Richmond                           | 1,104,980 | 2/2/2020  | 97.7 (76.6, 89.6, 105.8)    | 84.9 (71.9, 80.0, 88.6)    | -12.8 | 1.3% (3.5%, -0.9%)           |
| 1765 | United States of America | Riverside-San Bernardino           | 2,469,090 | 1/17/2020 | 130.9 (102.7, 119.1, 143.7) | 114.3 (89.9, 103.7, 122.9) | -16.7 | <b>-2.8% (-0.4%, -5.1%)</b>  |
| 1766 | United States of America | Rochester                          | 743,189   | 1/17/2020 | 94.0 (72.6, 88.0, 106.0)    | 89.5 (70.8, 82.6, 95.9)    | -4.5  | -2.7% (3.6%, -8.6%)          |
| 1767 | United States of America | Rockford                           | 324,104   | 2/2/2020  | 99.8 (65.4, 83.4, 110.3)    | 85.3 (65.9, 81.2, 101.6)   | -14.5 | 2.3% (9.1%, -4.1%)           |
| 1768 | United States of America | Round Lake Beach-McHenry-Grayslake | 370,214   | 2/2/2020  | 115.2 (72.3, 92.9, 121.6)   | 100.2 (73.7, 91.6, 119.9)  | -15.0 | -0.5% (6.4%, -6.9%)          |
| 1769 | United States of America | Sacramento                         | 2,122,795 | 1/17/2020 | 101.1 (80.8, 93.8, 110.3)   | 90.2 (79.4, 86.4, 96.5)    | -10.8 | <b>-1.8% (-0.2%, -3.4%)</b>  |
| 1770 | United States of America | Salt Lake City                     | 1,169,022 | 2/2/2020  | 142.1 (83.8, 104.6, 149.2)  | 107.1 (76.4, 90.0, 106.7)  | -35.0 | <b>-5.4% (-0.5%, -10.1%)</b> |
| 1771 | United States of America | San Antonio                        | 2,320,137 | 1/28/2020 | 92.9 (75.7, 86.6, 100.5)    | 85.8 (72.8, 82.6, 93.6)    | -7.1  | -1.5% (1.0%, -4.0%)          |
| 1772 | United States of America | San Diego                          | 3,251,064 | 1/17/2020 | 102.1 (81.1, 91.8, 110.6)   | 90.7 (72.5, 82.6, 94.4)    | -11.4 | -1.0% (1.7%, -3.7%)          |

|      |                          |                                         |           |           |                            |                           |       |                               |
|------|--------------------------|-----------------------------------------|-----------|-----------|----------------------------|---------------------------|-------|-------------------------------|
| 1773 | United States of America | San Francisco-Oakland                   | 3,313,702 | 1/17/2020 | 111.3 (80.4, 93.1, 126.7)  | 95.0 (73.9, 83.2, 100.6)  | -16.3 | -1.7% (0.2%, -3.6%)           |
| 1774 | United States of America | San Jose                                | 1,790,841 | 1/17/2020 | 126.1 (91.6, 114.3, 144.7) | 109.1 (83.0, 94.9, 112.0) | -17.0 | -1.4% (3.8%, -6.4%)           |
| 1775 | United States of America | Santa Rosa                              | 330,987   | 1/17/2020 | 80.3 (63.7, 73.6, 84.1)    | 71.4 (62.7, 71.4, 77.4)   | -9.0  | <b>-3.5% (-0.1%, -6.8%)</b>   |
| 1776 | United States of America | Sarasota-Bradenton                      | 736,184   | 2/2/2020  | 74.0 (63.2, 70.8, 82.3)    | 73.0 (64.2, 70.5, 79.6)   | -1.1  | 1.7% (4.1%, -0.6%)            |
| 1777 | United States of America | Savannah                                | 323,937   | 2/2/2020  | 78.7 (64.1, 75.9, 89.9)    | 75.1 (65.4, 72.6, 82.7)   | -3.6  | <b>-11.4% (-6.5%, -16.1%)</b> |
| 1778 | United States of America | Scranton                                | 375,329   | 2/2/2020  | 92.2 (68.8, 82.8, 101.5)   | 86.8 (70.2, 79.8, 95.6)   | -5.4  | 2.3% (8.8%, -3.8%)            |
| 1779 | United States of America | Seattle                                 | 3,432,944 | 2/2/2020  | 120.7 (88.4, 111.3, 141.8) | 102.7 (80.0, 98.8, 116.8) | -18.0 | <b>-11.5% (-4.1%, -18.3%)</b> |
| 1780 | United States of America | Shreveport                              | 321,537   | 2/2/2020  | 82.4 (67.6, 76.7, 87.9)    | 77.3 (67.9, 74.8, 80.6)   | -5.0  | -2.6% (0.4%, -5.5%)           |
| 1781 | United States of America | Spokane                                 | 446,988   | 2/2/2020  | 77.0 (61.2, 78.2, 90.2)    | 75.8 (63.8, 74.9, 85.2)   | -1.1  | -5.7% (1.5%, -12.3%)          |
| 1782 | United States of America | Springfield, Massachusetts, Connecticut | 669,157   | 2/2/2020  | 99.5 (69.9, 85.4, 107.6)   | 87.5 (70.4, 80.9, 95.8)   | -12.0 | -1.6% (6.8%, -9.3%)           |
| 1783 | United States of America | Springfield, Missouri                   | 347,079   | 2/2/2020  | 74.4 (60.4, 72.0, 82.2)    | 75.3 (64.6, 73.1, 82.2)   | 0.9   | 0.1% (3.4%, -3.1%)            |

|      |                          |                      |           |           |                            |                            |       |                             |
|------|--------------------------|----------------------|-----------|-----------|----------------------------|----------------------------|-------|-----------------------------|
| 1784 | United States of America | St. Louis            | 2,212,730 | 2/2/2020  | 112.0 (81.4, 99.8, 123.0)  | 99.7 (81.4, 96.0, 114.9)   | -12.4 | -1.4% (3.2%, -5.9%)         |
| 1785 | United States of America | Stockton             | 436,122   | 1/17/2020 | 101.8 (82.9, 95.1, 109.2)  | 94.4 (81.1, 88.2, 97.5)    | -7.3  | <b>-1.9% (-0.3%, -3.4%)</b> |
| 1786 | United States of America | Syracuse             | 419,994   | 1/17/2020 | 90.2 (67.2, 81.0, 99.0)    | 88.2 (69.6, 79.1, 98.2)    | -2.0  | -3.0% (3.7%, -9.2%)         |
| 1787 | United States of America | Tampa-St. Petersburg | 2,877,274 | 2/2/2020  | 86.2 (72.8, 83.7, 96.5)    | 85.5 (74.3, 82.6, 93.3)    | -0.7  | -0.2% (2.1%, -2.5%)         |
| 1788 | United States of America | Toledo               | 509,059   | 2/2/2020  | 108.6 (78.0, 96.6, 121.7)  | 102.9 (81.1, 95.4, 113.3)  | -5.7  | -0.5% (3.8%, -4.6%)         |
| 1789 | United States of America | Trenton              | 328,513   | 2/2/2020  | 134.8 (92.6, 113.2, 149.3) | 109.7 (85.8, 102.3, 122.2) | -25.1 | -3.9% (1.1%, -8.7%)         |
| 1790 | United States of America | Tucson               | 982,018   | 2/2/2020  | 84.7 (71.3, 85.4, 96.8)    | 82.6 (73.2, 81.3, 90.9)    | -2.2  | <b>-3.4% (-0.8%, -6.0%)</b> |
| 1791 | United States of America | Tulsa                | 765,813   | 2/2/2020  | 89.3 (69.9, 83.1, 99.3)    | 84.2 (71.3, 81.6, 93.1)    | -5.1  | 0.6% (3.5%, -2.2%)          |
| 1792 | United States of America | Visalia              | 401,041   | 1/17/2020 | 92.9 (80.6, 92.2, 101.4)   | 87.9 (76.6, 89.7, 97.6)    | -5.1  | -0.9% (2.7%, -4.5%)         |
| 1793 | United States of America | Washington, D.C.     | 5,321,730 | 2/2/2020  | 123.3 (92.7, 105.9, 132.5) | 101.4 (82.4, 93.5, 111.7)  | -22.0 | 0.1% (2.3%, -2.0%)          |
| 1794 | United States of America | Wichita              | 526,682   | 2/2/2020  | 82.3 (64.3, 76.3, 88.0)    | 80.3 (69.1, 78.9, 86.6)    | -2.0  | -3.4% (0.4%, -7.1%)         |
| 1795 | United States of America | Winston-Salem        | 508,957   | 2/2/2020  | 91.7 (73.2, 84.0, 96.2)    | 81.8 (70.4, 78.6, 89.9)    | -9.9  | -0.7% (2.2%, -3.4%)         |
| 1796 | United States of America | Worcester            | 547,743   | 2/2/2020  | 95.5 (68.0, 83.5, 105.1)   | 91.9 (69.4, 85.2, 100.8)   | -3.6  | -2.8% (5.5%, -10.4%)        |
| 1797 | United States of America | Youngstown           | 357,213   | 2/2/2020  | 103.9 (73.5, 88.8, 111.1)  | 87.9 (73.8, 82.1, 96.7)    | -16.0 | -6.2% (3.2%, -14.7%)        |



|      |                                    |                   |           |           |                             |                             |       |                              |
|------|------------------------------------|-------------------|-----------|-----------|-----------------------------|-----------------------------|-------|------------------------------|
| 1798 | United States of America           | Concord           | 682,892   | 1/17/2020 | 104.2 (82.7, 95.9, 113.6)   | 88.3 (77.1, 86.2, 97.0)     | -15.9 | -1.8% (0.9%, -4.4%)          |
| 1799 | United States of America           | Kissimmee         | 527,793   | 2/2/2020  | 80.4 (66.7, 78.0, 89.1)     | 79.1 (68.3, 77.3, 84.7)     | -1.4  | -0.7% (1.6%, -2.9%)          |
| 1800 | United States of America           | Mission Viejo     | 635,623   | 1/17/2020 | 116.6 (87.2, 100.8, 131.9)  | 100.3 (77.8, 89.7, 104.5)   | -16.4 | <b>5.1% (10.0%, 0.5%)</b>    |
| 1801 | United States of America           | Myrtle Beach      | 376,624   | 2/2/2020  | 72.8 (61.7, 71.5, 81.4)     | 74.7 (65.0, 71.5, 79.3)     | 2.0   | -0.2% (1.6%, -2.0%)          |
| 1802 | United States of America           | Port St. Lucie    | 520,605   | 2/2/2020  | 66.9 (57.1, 65.0, 75.3)     | 71.3 (62.2, 69.1, 76.7)     | 4.4   | <b>-2.2% (-0.2%, -4.1%)</b>  |
| 1803 | United States of America           | Santa Clarita     | 391,549   | 1/17/2020 | 126.7 (92.4, 113.5, 143.2)  | 110.4 (83.8, 100.0, 121.7)  | -16.4 | 0.7% (5.7%, -4.1%)           |
| 1804 | United States of America           | Temecula-Murrieta | 848,482   | 1/17/2020 | 90.6 (77.1, 86.9, 96.9)     | 84.4 (73.0, 81.9, 90.6)     | -6.2  | <b>-2.2% (-0.9%, -3.6%)</b>  |
| 1805 | United States of America           | The Woodlands     | 569,773   | 1/28/2020 | 95.5 (75.9, 86.4, 101.3)    | 89.0 (73.9, 82.6, 94.4)     | -6.6  | -2.8% (0.4%, -5.9%)          |
| 1806 | Uruguay                            | Montevideo        | 1,752,388 | 3/13/2020 | 69.6 (57.8, 66.3, 75.0)     | 62.4 (50.6, 59.6, 70.6)     | -7.2  | <b>-3.5% (-2.3%, -4.6%)</b>  |
| 1807 | Uzbekistan                         | Andizhan          | 442,863   | 3/1/2020  | 136.4 (100.8, 120.1, 150.3) | 101.4 (87.5, 100.5, 112.4)  | -35.0 | 0.4% (4.9%, -3.9%)           |
| 1808 | Uzbekistan                         | Namangan          | 528,763   | 3/1/2020  | 132.6 (104.5, 119.1, 140.4) | 101.8 (86.4, 96.4, 113.2)   | -30.8 | 1.4% (5.3%, -2.4%)           |
| 1809 | Uzbekistan                         | Nukus             | 338,175   | 3/1/2020  | 71.9 (56.7, 73.1, 87.0)     | 76.7 (69.1, 77.3, 84.9)     | 4.8   | -2.3% (0.2%, -4.7%)          |
| 1810 | Uzbekistan                         | Samarkand         | 578,762   | 3/1/2020  | 115.3 (92.2, 107.2, 128.2)  | 98.0 (84.9, 94.4, 106.8)    | -17.3 | <b>-2.9% (-1.6%, -4.1%)</b>  |
| 1811 | Uzbekistan                         | Tashkent          | 2,517,381 | 3/1/2020  | 257.9 (153.2, 212.4, 307.9) | 169.9 (115.2, 141.8, 204.3) | -88.0 | <b>-8.7% (-2.8%, -14.2%)</b> |
| 1812 | Venezuela (Bolivarian Republic of) | Acarigua-Aruare   | 338,983   | 3/12/2020 | 51.2 (43.6, 49.1, 57.1)     | 58.2 (48.7, 56.9, 67.2)     | 7.0   | 1.2% (2.8%, -0.3%)           |

|      |                                          |                  |           |           |                         |                         |      |                             |
|------|------------------------------------------|------------------|-----------|-----------|-------------------------|-------------------------|------|-----------------------------|
| 1813 | Venezuela<br>(Bolivarian<br>Republic of) | Barinas          | 380,483   | 3/12/2020 | 44.9 (38.9, 43.9, 49.2) | 51.9 (44.7, 50.4, 58.9) | 7.0  | <b>2.0% (3.5%, 0.5%)</b>    |
| 1814 | Venezuela<br>(Bolivarian<br>Republic of) | Barquisimeto     | 1,214,362 | 3/12/2020 | 51.2 (44.9, 51.2, 57.6) | 54.7 (48.6, 54.7, 59.5) | 3.5  | 0.3% (1.8%, -1.2%)          |
| 1815 | Venezuela<br>(Bolivarian<br>Republic of) | Cabimas          | 578,222   | 3/12/2020 | 54.6 (46.9, 53.5, 60.7) | 56.6 (49.6, 55.5, 61.1) | 2.0  | <b>-1.9% (-0.2%, -3.6%)</b> |
| 1816 | Venezuela<br>(Bolivarian<br>Republic of) | Caracas          | 2,938,992 | 3/12/2020 | 63.5 (50.9, 60.1, 70.8) | 59.6 (50.9, 57.3, 66.1) | -3.9 | <b>-5.7% (-2.9%, -8.3%)</b> |
| 1817 | Venezuela<br>(Bolivarian<br>Republic of) | Ciudad Bolivar   | 402,476   | 3/12/2020 | 41.2 (37.4, 41.5, 45.3) | 43.7 (39.9, 43.8, 47.3) | 2.5  | -0.6% (0.5%, -1.6%)         |
| 1818 | Venezuela<br>(Bolivarian<br>Republic of) | Ciudad Guayana   | 917,700   | 3/12/2020 | 41.3 (36.0, 40.7, 45.5) | 44.9 (39.4, 44.8, 49.4) | 3.6  | -1.8% (0.1%, -3.6%)         |
| 1819 | Venezuela<br>(Bolivarian<br>Republic of) | Cumana           | 393,023   | 3/12/2020 | 46.2 (40.3, 45.3, 51.7) | 51.1 (45.9, 50.7, 56.1) | 4.9  | -0.4% (1.3%, -2.0%)         |
| 1820 | Venezuela<br>(Bolivarian<br>Republic of) | Guarenas-Guatire | 451,542   | 3/12/2020 | 45.7 (37.7, 44.2, 52.0) | 54.8 (44.3, 49.8, 60.9) | 9.1  | -0.4% (1.9%, -2.7%)         |
| 1821 | Venezuela<br>(Bolivarian<br>Republic of) | Maracaibo        | 2,257,999 | 3/12/2020 | 67.8 (56.1, 65.7, 77.1) | 65.5 (53.9, 61.7, 74.0) | -2.3 | 0.8% (1.9%, -0.4%)          |
| 1822 | Venezuela<br>(Bolivarian<br>Republic of) | Maracay          | 1,203,227 | 3/12/2020 | 55.5 (46.3, 54.1, 62.7) | 56.5 (49.6, 54.7, 61.3) | 1.1  | -0.1% (1.6%, -1.8%)         |

|      |                                          |                                           |           |           |                            |                            |       |                             |
|------|------------------------------------------|-------------------------------------------|-----------|-----------|----------------------------|----------------------------|-------|-----------------------------|
| 1823 | Venezuela<br>(Bolivarian<br>Republic of) | Maturin                                   | 694,716   | 3/12/2020 | 41.6 (37.0, 41.5, 45.7)    | 45.0 (40.8, 44.8, 48.5)    | 3.4   | -0.7% (0.6%, -2.0%)         |
| 1824 | Venezuela<br>(Bolivarian<br>Republic of) | Merida                                    | 343,834   | 3/12/2020 | 40.8 (36.1, 40.6, 45.1)    | 43.0 (38.4, 42.8, 45.9)    | 2.3   | <b>1.7% (2.9%, 0.4%)</b>    |
| 1825 | Venezuela<br>(Bolivarian<br>Republic of) | San Crist?al                              | 471,046   | 3/12/2020 | 42.1 (37.3, 41.8, 46.5)    | 43.8 (40.0, 43.7, 47.2)    | 1.7   | -1.5% (0.1%, -3.1%)         |
| 1826 | Venezuela<br>(Bolivarian<br>Republic of) | Valencia                                  | 1,910,188 | 3/12/2020 | 63.3 (51.3, 60.6, 73.1)    | 61.6 (52.2, 59.5, 68.1)    | -1.7  | -1.3% (0.2%, -2.8%)         |
| 1827 | Venezuela<br>(Bolivarian<br>Republic of) | Barcelona-Puerto La Cruz                  | 793,641   | 3/12/2020 | 50.7 (45.2, 50.7, 56.6)    | 54.9 (49.6, 55.2, 59.9)    | 4.2   | 1.0% (2.4%, -0.3%)          |
| 1828 | Viet Nam                                 | Bien Hoa                                  | 1,013,064 | 1/25/2020 | 81.1 (67.8, 79.9, 91.8)    | 81.2 (69.9, 81.7, 93.1)    | 0.1   | -1.1% (1.2%, -3.3%)         |
| 1829 | Viet Nam                                 | Da Nang                                   | 1,125,316 | 1/25/2020 | 59.7 (49.1, 59.4, 69.4)    | 59.9 (52.1, 60.7, 66.9)    | 0.2   | <b>-2.6% (-0.6%, -4.5%)</b> |
| 1830 | Viet Nam                                 | Hai Ph?g                                  | 1,300,088 | 1/25/2020 | 129.7 (75.3, 99.0, 133.8)  | 100.7 (69.9, 83.1, 112.5)  | -29.0 | 2.6% (9.1%, -3.5%)          |
| 1831 | Viet Nam                                 | H?Noi                                     | 4,678,198 | 1/25/2020 | 118.9 (90.2, 106.9, 132.9) | 106.7 (89.3, 102.3, 120.4) | -12.2 | 1.7% (6.2%, -2.7%)          |
| 1832 | Viet Nam                                 | Th?h Pho Ho Ch?Minh (Ho<br>Chi Minh City) | 8,602,317 | 1/25/2020 | 91.6 (70.8, 85.5, 106.1)   | 87.4 (72.1, 87.1, 100.2)   | -4.3  | -0.7% (2.3%, -3.6%)         |
| 1833 | Viet Nam                                 | Can Tho                                   | 1,617,602 | 1/25/2020 | 57.4 (48.9, 56.7, 64.1)    | 60.1 (52.0, 58.4, 66.7)    | 2.7   | 0.0% (2.3%, -2.2%)          |
| 1834 | Viet Nam                                 | Hue                                       | 400,320   | 1/25/2020 | 59.5 (47.8, 57.3, 69.0)    | 60.4 (52.7, 60.0, 67.1)    | 0.9   | <b>-3.8% (-1.2%, -6.3%)</b> |
| 1835 | Viet Nam                                 | Nha Trang                                 | 329,373   | 1/25/2020 | 50.4 (42.7, 49.5, 58.8)    | 51.0 (43.7, 50.3, 56.9)    | 0.6   | -0.9% (0.9%, -2.6%)         |

|      |          |             |           |           |                           |                          |       |                            |
|------|----------|-------------|-----------|-----------|---------------------------|--------------------------|-------|----------------------------|
| 1836 | Viet Nam | Long Xuyen  | 321,104   | 1/25/2020 | 61.5 (52.1, 60.3, 68.1)   | 64.4 (55.4, 62.6, 72.2)  | 2.9   | -1.2% (2.1%, -4.3%)        |
| 1837 | Viet Nam | Vungtau     | 417,824   | 1/25/2020 | 58.9 (49.5, 55.4, 65.0)   | 56.4 (46.9, 53.1, 63.5)  | -2.6  | 0.6% (3.0%, -1.8%)         |
| 1838 | Viet Nam | Thu Dau Mot | 413,397   | 1/25/2020 | 76.3 (63.0, 73.1, 89.3)   | 78.3 (70.2, 78.3, 87.3)  | 2.0   | -1.8% (0.6%, -4.1%)        |
| 1839 | Yemen    | Adan (Aden) | 980,455   | 3/15/2020 | 53.9 (44.4, 51.5, 59.9)   | 60.2 (49.6, 56.6, 67.2)  | 6.3   | 0.7% (4.0%, -2.4%)         |
| 1840 | Yemen    | Al-Hudaydah | 668,899   | 3/15/2020 | 52.3 (46.4, 51.3, 57.9)   | 54.9 (51.4, 54.5, 57.6)  | 2.6   | 1.2% (3.2%, -0.8%)         |
| 1841 | Yemen    | Sana'a'     | 2,972,988 | 3/15/2020 | 81.9 (59.1, 71.6, 92.3)   | 70.5 (54.6, 63.0, 73.3)  | -11.5 | -3.6% (2.9%, -9.7%)        |
| 1842 | Yemen    | Ta'izz      | 845,154   | 3/15/2020 | 54.0 (46.8, 53.2, 59.7)   | 57.6 (50.8, 56.2, 62.5)  | 3.6   | 2.6% (5.5%, -0.2%)         |
| 1843 | Yemen    | Al-Mukalla  | 506,356   | 3/15/2020 | 51.1 (44.4, 49.9, 57.4)   | 55.1 (46.8, 53.0, 60.3)  | 4.0   | 2.0% (4.8%, -0.7%)         |
| 1844 | Yemen    | Dhamar      | 351,039   | 3/15/2020 | 52.5 (46.7, 51.9, 58.4)   | 52.7 (48.0, 53.0, 55.9)  | 0.2   | 1.2% (4.0%, -1.6%)         |
| 1845 | Yemen    | Ibb         | 648,889   | 3/15/2020 | 56.4 (48.4, 55.1, 63.7)   | 56.1 (47.8, 55.9, 61.0)  | -0.2  | -1.8% (1.3%, -4.8%)        |
| 1846 | Zambia   | Kitwe       | 685,908   | 2/21/2020 | 54.8 (40.9, 47.8, 69.0)   | 52.0 (41.2, 47.3, 60.2)  | -2.8  | <b>3.9% (7.3%, 0.6%)</b>   |
| 1847 | Zambia   | Lusaka      | 2,774,133 | 2/21/2020 | 64.1 (48.7, 59.3, 76.0)   | 55.4 (46.5, 53.2, 62.2)  | -8.7  | 2.1% (5.6%, -1.3%)         |
| 1848 | Zambia   | Ndola       | 542,495   | 2/21/2020 | 63.8 (42.8, 53.6, 79.7)   | 53.1 (42.6, 49.4, 61.0)  | -10.7 | 0.0% (3.0%, -2.9%)         |
| 1849 | Zimbabwe | Bulawayo    | 638,188   | 1/28/2020 | 57.2 (49.0, 56.0, 64.4)   | 50.0 (45.0, 49.8, 54.9)  | -7.2  | -1.0% (0.4%, -2.5%)        |
| 1850 | Zimbabwe | Chitungwiza | 386,452   | 1/28/2020 | 56.9 (46.7, 54.0, 66.2)   | 48.6 (42.9, 47.9, 52.9)  | -8.3  | 0.1% (1.7%, -1.4%)         |
| 1851 | Zimbabwe | Harare      | 1,529,920 | 1/28/2020 | 68.4 (51.8, 62.8, 81.5)   | 56.2 (46.9, 53.0, 64.3)  | -12.2 | <b>-1.8% (0.0%, -3.5%)</b> |
|      | Overall  |             | /         | 1/1/2020  | 106.4 (60.1, 82.1, 114.9) | 93.3 (61.4, 79.7, 104.7) | -13.1 |                            |

**Table S3** - Region-specific percent changes of Sentinel 5P satellite observed NO<sub>2</sub> associated with stringent CRPs compared to the pre-CRP from January 1st 2019, to July 31st 2020, across 1,768 world locations. The regions are based on World Bank definition. Statistically significant (with P-value < 0.05) changes in NO<sub>2</sub> levels are indicated in bold.

|                              | Mild CRPs                    | Moderate CRPs                   | Stringent CRPs                   |
|------------------------------|------------------------------|---------------------------------|----------------------------------|
| South Asia                   | -2.01% (-5.30%, 1.39%)       | -4.22% (-12.65%, 5.02%)         | <b>-8.16% (-14.74%, -1.06%)</b>  |
| Europe and Central Asia      | <b>6.85% (1.96%, 11.97%)</b> | 4.60% (-0.40%, 9.85%)           | 0.87% (-4.08%, 6.07%)            |
| Middle East and North Africa | -0.73% (-3.73%, 2.38%)       | <b>-6.71% (-11.44%, -1.72%)</b> | <b>-14.74% (-21.37%, -7.55%)</b> |
| Sub-Saharan Africa           | 1.75% (-0.24%, 3.79%)        | 0.39% (-2.70%, 3.57%)           | -1.39% (-5.32%, 2.71%)           |
| Latin America and Caribbean  | 0.65% (-1.95%, 3.33%)        | -2.54% (-5.03%, 0.00%)          | <b>-6.13% (-8.80%, -3.39%)</b>   |
| East Asia and Pacific        | 1.90% (-2.78%, 6.80%)        | -2.62% (-13.47%, 9.59%)         | -5.82% (-16.75%, 6.55%)          |
| North America                | 13.90% (-7.04%, 39.56%)      | 8.38% (-18.96%, 44.94%)         | 5.65% (-16.43%, 33.55%)          |

**Table S4** - Percentage change of tropospheric NO<sub>2</sub> concentration associated with stringent CRPs in some populated cities. Statistically significant (with P-value < 0.05) changes in NO<sub>2</sub> levels are indicated in bold.

| <b>World Bank Region</b>     | <b>Urban Agglomeration</b> | <b>Country or area</b>     | <b>Population*</b> | <b>Relative Change (95% CI)**</b> |
|------------------------------|----------------------------|----------------------------|--------------------|-----------------------------------|
| East Asia and Pacific        | Shanghai                   | China                      | 27058479           | <b>-63.4% (-42.7%, -76.6%)</b>    |
| East Asia and Pacific        | Beijing                    | China                      | 20462610           | <b>-55.0% (-34.3%, -69.1%)</b>    |
| East Asia and Pacific        | Chongqing                  | China                      | 15872179           | <b>-67.0% (-50.7%, -77.9%)</b>    |
| East Asia and Pacific        | Manila                     | Philippines                | 13923452           | <b>-42.4% (-2.4%, -66.0%)</b>     |
| East Asia and Pacific        | Tianjin                    | China                      | 13589078           | <b>-51.9% (-31.7%, -66.1%)</b>    |
| East Asia and Pacific        | Guangzhou,<br>Guangdong    | China                      | 13301532           | <b>-48.9% (-23.7%, -65.8%)</b>    |
| Europe and Central Asia      | Istanbul                   | Turkey                     | 15190336           | <b>78.4% (170.0%, 17.9%)</b>      |
| Europe and Central Asia      | Paris                      | France                     | 11017230           | -42.5% (1.9%, -67.6%)             |
| Europe and Central Asia      | London                     | United Kingdom             | 9304016            | -2.0% (47.2%, -34.8%)             |
| Europe and Central Asia      | Madrid                     | Spain                      | 6617513            | 17.3% (71.2%, -19.6%)             |
| Europe and Central Asia      | Rome                       | Italy                      | 4257056            | -2.1% (42.2%, -32.6%)             |
| Europe and Central Asia      | Milan                      | Italy                      | 3140181            | -34.2% (3.3%, -58.0%)             |
| Latin America and Caribbean  | São Paulo                  | Brazil                     | 22043028           | -16.0% (10.6%, -36.2%)            |
| Latin America and Caribbean  | Mexico City                | Mexico                     | 21782378           | -20.1% (31.4%, -51.4%)            |
| Latin America and Caribbean  | Buenos Aires               | Argentina                  | 15153729           | <b>-27.4% (-10.2%, -41.4%)</b>    |
| Latin America and Caribbean  | Rio de Janeiro             | Brazil                     | 13458075           | <b>-26.4% (-8.4%, -41.0%)</b>     |
| Middle East and North Africa | Cairo                      | Egypt                      | 20900604           | -15.2% (6.1%, -32.2%)             |
| Middle East and North Africa | Tehran                     | Iran (Islamic Republic of) | 9134708            | 9.1% (119.8%, -45.8%)             |
| Middle East and North Africa | Riyadh                     | Saudi Arabia               | 7231447            | -23.3% (0.2%, -41.3%)             |
| Middle East and North Africa | Baghdad                    | Iraq                       | 7144260            | <b>-62.8% (-38.5%, -77.5%)</b>    |
| Middle East and North Africa | Alexandria                 | Egypt                      | 5280664            | -10.7% (5.4%, -24.3%)             |
| North America                | New York-Newark            | United States of America   | 18803552           | 15.1% (111.0%, -37.2%)            |

|                    |                                  |                                  |          |                                |
|--------------------|----------------------------------|----------------------------------|----------|--------------------------------|
| North America      | Los Angeles-Long Beach-Santa Ana | United States of America         | 12446597 | 7.6% (78.7%, -35.2%)           |
| North America      | Chicago                          | United States of America         | 8865009  | 29.9% (140.4%, -29.9%)         |
| North America      | Houston                          | United States of America         | 6370704  | <b>-23.2% (-6.8%, -36.7%)</b>  |
| North America      | Dallas-Fort Worth                | United States of America         | 6300661  | <b>-36.3% (-10.9%, -54.4%)</b> |
| North America      | Toronto                          | Canada                           | 6196731  | 17.0% (38.5%, -1.2%)           |
| South Asia         | Delhi                            | India                            | 30290936 | <b>-63.1% (-40.4%, -77.2%)</b> |
| South Asia         | Dhaka                            | Bangladesh                       | 21005860 | <b>-50.6% (-15.1%, -71.3%)</b> |
| South Asia         | Mumbai                           | India                            | 20411274 | -11.6% (29.8%, -39.8%)         |
| South Asia         | Karachi                          | Pakistan                         | 16093786 | 5.7% (21.5%, -8.0%)            |
| South Asia         | Kolkata                          | India                            | 14850066 | -17.8% (20.3%, -43.8%)         |
| Sub-Saharan Africa | Lagos                            | Nigeria                          | 14368332 | -15.8% (17.6%, -39.8%)         |
| Sub-Saharan Africa | Kinshasa                         | Democratic Republic of the Congo | 14342439 | <b>58.1% (138.2%, 4.9%)</b>    |
| Sub-Saharan Africa | Luanda                           | Angola                           | 8329798  | -1.4% (33.2%, -26.9%)          |
| Sub-Saharan Africa | Khartoum                         | Sudan                            | 5828858  | 11.9% (46.7%, -14.7%)          |
| Sub-Saharan Africa | Johannesburg                     | South Africa                     | 5782747  | <b>-74.1% (-52.7%, -85.8%)</b> |

\* Population in each city is the total population in 2020, estimated by the Population division, Department of Economic and Social Affairs, United Nations

\*\* Results are present as relative change (RC) and 95% confidence interval (CI). This is estimated in linking categorical CPRs with satellite observation NO<sub>2</sub> using city-specific log-linear regression model, after adjusted for time trend, meteorology and the day of week.

Only cities that experienced stringent CPRs were presented above.

**Table S5** - The effect modification of COVID-19 stringent CRPs on tropospheric NO<sub>2</sub> concentration by population size and baseline NO<sub>2</sub> pollution

| Variable                              | Units                          | Percent change         | P-value |
|---------------------------------------|--------------------------------|------------------------|---------|
| Population                            | Log <sub>10</sub> (Population) | -11.43 (-14.08, -8.70) | <0.0001 |
| Baseline NO <sub>2</sub>              | 10 μmol/m <sup>2</sup>         | -1.78 (-1.98, -1.49)   | <0.0001 |
| Population + Baseline NO <sub>2</sub> | Log <sub>10</sub> (Population) | -4.91 (-7.80, -1.93)   | 0.0014  |
|                                       | 10 μmol/m <sup>2</sup>         | -1.59 (-1.88, )        | <0.0001 |



**Table S6** - Percentage change of tropospheric NO<sub>2</sub> concentration associated with 10 unit increase in CRPs scores (sample size was 1851 cities).  
The AIC values are for the average values across 1851 models.

| Model | Time trend                 | Meteorology                | Relative Change (%) | 95% CI         | AIC    |
|-------|----------------------------|----------------------------|---------------------|----------------|--------|
| 1     | City-specific cubic spline | City-specific cubic spline | -0.99               | (-0.70, -1.29) | 86.10  |
| 2     | Time stratified            | City-specific cubic spline | -0.28               | (-0.06, -0.50) | 128.36 |
| 3     | Periodic function          | City-specific cubic spline | -0.57               | (-0.35, -0.79) | 111.77 |
| 4     | City-specific cubic spline | Linear                     | -1.04               | (-0.74, -1.33) | 97.62  |
| 5     | City-specific cubic spline | Universal nonlinear        | -0.97               | (-0.67, -1.26) | 93.98  |

The estimations presented here are the relative changes of nitrogen dioxide associated with 10 unites increase in CRPs score, which were the pooled estimations from 1851 cities using the two-stage framework (obtaining city-specific estimates, and then meta-analysis).

City-specific natural spline: natural cubic spline with city-specific degrees of freedom to control the time-dependent or meteorology-dependent change in tropospheric nitrogen dioxide;

Time-stratified: the day of the week, the day of the month, the month of the year, and year as factors to control the fixed effects of the long-term and short-term trend.

Periodic function: the time trend was decomposed into a combination of cosine and sine functions with 365.25 days as a period, to control the seasonal and short-term change for tropospheric nitrogen dioxide.

Linear: a linear association between meteorological covariates and nitrogen dioxide was assumed and adjusted in the model.

Universal nonlinear: natural spline with two degrees of freedom was applied for all cities to control the non-linear association between meteorology and nitrogen dioxide.

**Table S7:** Percentage change of tropospheric NO<sub>2</sub> concentration associated with 10 unit increase in CRPs scores (sample size was 1851 cities). The AIC values are for the average values across 1851 models.

| Model                         | RR    | 95% CI         | AIC    |
|-------------------------------|-------|----------------|--------|
| Final model                   | -0.99 | (-0.70, -1.29) | 86.10  |
| Final model + autocorrelation | -0.99 | (-0.70, -1.27) | 173.51 |

The estimations presented here are the relative changes of nitrogen dioxide associated with 10 unites increase in CRPs score, which were the pooled estimations from 1851 cities using the two-stage framework (obtaining city-specific estimates, and then meta-analysis).

Final model used natural cubic spline with city-specific degrees of freedom to control the time-dependent or meteorology-dependent change in tropospheric nitrogen dioxide;

### Supplementary Text 1: COVID-19 containment response policies data and clustering

To compare the global “containment and closure” related COVID-19 response policies, we obtained eight policy indicators data (Table S8) from Oxford’s COVID-19 Government Response Tracker (OxCGRT) (29, 30). Each policy indicator at each country was recorded as time series.

We collected each policy indicator since firstly implemented in each country until July 31, 2020. The observations used in this analysis constituted 40,163 COVID-19 response policies dates across 229 countries and areas (note that the eight policies of Table S3 were implemented at different days across 229 countries).

$$I_{j,t} = 100 \times \frac{v_{j,t} - 0.5 \times (F_j - f_{j,t})}{N_j}$$

Following the equation above proposed by OxCGRT, we converted the ordinal scale of each implemented policy in Table S4 to a numerical score from 0 to 100 (29) (Table S9). Where,  $N_j$  is the maximum value of each indicator;  $F_j$  and  $f_{j,t}$  are the indicator of scope record and the recorded binary number in certain time, and  $v_{j,t}$  is the recorded policy value on the ordinal scale.

After summarizing the CRPs, we observed that “International Travel Control” and “Restriction on Gathering” were the earliest COVID-19 response policies, initially issued on January 01, 2020. With the COVID-19 gradually formulating the epidemic, other COVID-19 response policies were introduced step by step. Besides, the 1st quarter value of “School Closure”, “Cancel Public events”, and “International Travel Control” were quite higher than other COVID-19 response policies meaning that these policies were widely implemented across countries compared to others (Table S10).

Using such data, we conducted a K-mean algorithm with gap statistic method (31) to explore the potential cluster number within the whole observations. The principle of cluster analysis was to group the observations based on their similarity (32, 33). Within the clusters, the K-mean algorithm with Euclidean distance (34, 35) was used, which projected all the observations into a N-dimension Euclidean space and centroid calculation and observation grouping process was iterated to cluster the observations (35).

The result of the gap statistic is presented in Figure S13. As shown, we can see that although there was no peak in the gap statistic curve, the rising rate of the gap function sharply decreased after cluster number larger than 3, which was then chosen as the optimal number for clustering.

Applying the K-mean algorithm, all the COVID-19 CRPs dates were classified into three groups (mild, moderate, and stringent CRPs). To take a snapshot of what the three groups look like, we calculated the cluster centroids for each cluster (Table S11).

Comparing among different clusters, we can see that the centroids values for all COVID-19 CRPs were largest at stringent, and were smallest at mild CRPs. In other words, from mild to stringent, all COVID-19 CRPs got stricter. Looking at CRPs at

each cluster, “International Travel Control” stand out most. Even at the mild cluster, the centroid value of “International Travel Control” already surpassed half of the scale (>50). However, the centroid values of other COVID-19 CRPs just reached 15% of the scale at this cluster (for “School Closure”). This indicated that “International Travel Control” was a commonly used COVID-19 response policy and widely and strictly implemented during the pandemic. Across all the clusters, the centroid values of “Close Public Transportation” and “Stay at Home Requirement” were always the least two. This may show that these two CRPs were conservatively used during this pandemic.

In order to better interpret and understand the detailed COVID-19 CRPs, this study linked the policy feature in each cluster with the OxCGRT codebook, and presented the policies description of each COVID-19 response phase, which are presented in Table 1.

**Table S8-** Summary of the included containment and closure policies

| <b>Policy</b>                           | <b>Description</b>                                                                                         | <b>Measurement</b>        | <b>Geographic scope record</b> |
|-----------------------------------------|------------------------------------------------------------------------------------------------------------|---------------------------|--------------------------------|
| <b>School closure</b>                   | Record closing of schools and university                                                                   | Ordinal scale from 0 to 3 | True                           |
| <b>Workplace closing</b>                | Record closings of workplaces                                                                              | Ordinal scale from 0 to 3 | True                           |
| <b>Cancel public events</b>             | Record cancelling public events                                                                            | Ordinal scale from 0 to 2 | True                           |
| <b>Restriction on gatherings</b>        | Record limits on private gatherings                                                                        | Ordinal scale from 0 to 4 | True                           |
| <b>Close public transportation</b>      | Record closing of public transport                                                                         | Ordinal scale from 0 to 2 | True                           |
| <b>Stay at home requirement</b>         | Record orders to "shelter-in-place" and otherwise confine to the home                                      | Ordinal scale from 0 to 2 | True                           |
| <b>Restriction on internal movement</b> | Record restrictions on internal movement between cities/regions                                            | Ordinal scale from 0 to 3 | True                           |
| <b>International travel control</b>     | Record restrictions on international travel. Note: this records policy for foreign travelers, not citizens | Ordinal scale from 0 to 4 | False                          |

**Table S9** – The data structure of COVID-19 CRPs in OxCGRT.

| Country     | Date     | School closure | Workplace closing | Cancel public events | Restriction on gatherings | Close public transportation | Stay at home requirement | Restriction on internal movement | International travel control |
|-------------|----------|----------------|-------------------|----------------------|---------------------------|-----------------------------|--------------------------|----------------------------------|------------------------------|
| Aruba       | 20200401 | 100            | 100               | 100                  | 100                       | 0                           | 66.67                    | 100                              | 100                          |
| Aruba       | 20200402 | 100            | 100               | 100                  | 100                       | 0                           | 66.67                    | 100                              | 100                          |
| Aruba       | 20200403 | 100            | 100               | 100                  | 100                       | 0                           | 66.67                    | 100                              | 100                          |
| Aruba       | 20200404 | 100            | 100               | 100                  | 100                       | 0                           | 66.67                    | 100                              | 100                          |
| Aruba       | 20200405 | 100            | 100               | 100                  | 100                       | 0                           | 66.67                    | 100                              | 100                          |
| Aruba       | 20200406 | 100            | 100               | 100                  | 100                       | 0                           | 66.67                    | 100                              | 100                          |
| Aruba       | 20200407 | 100            | 100               | 100                  | 100                       | 0                           | 66.67                    | 100                              | 100                          |
| Afghanistan | 20200401 | 100            | 83.33             | 100                  | 0                         | 75                          | 50                       | 25                               | 75                           |
| Afghanistan | 20200402 | 100            | 83.33             | 100                  | 0                         | 75                          | 50                       | 25                               | 75                           |
| Afghanistan | 20200403 | 100            | 83.33             | 100                  | 0                         | 75                          | 50                       | 25                               | 75                           |
| Afghanistan | 20200404 | 100            | 83.33             | 100                  | 0                         | 75                          | 50                       | 25                               | 75                           |
| Afghanistan | 20200405 | 100            | 83.33             | 100                  | 100                       | 75                          | 50                       | 25                               | 75                           |
| Afghanistan | 20200406 | 100            | 83.33             | 100                  | 100                       | 75                          | 50                       | 25                               | 75                           |
| Afghanistan | 20200407 | 100            | 83.33             | 100                  | 100                       | 75                          | 50                       | 25                               | 75                           |

**Table S10** – Summary of the converted daily COVID-19 CRPs data used for the analysis

|                                             | <b>1st<br/>Quarte<br/>r</b> | <b>Media<br/>n</b> | <b>3rd<br/>Quarte<br/>r</b> | <b>Mea<br/>n</b> | <b>First issued<br/>date</b> | <b>Issued<br/>country/area<br/>*</b> |
|---------------------------------------------|-----------------------------|--------------------|-----------------------------|------------------|------------------------------|--------------------------------------|
| <b>School closure</b>                       | 50.00                       | 100.00             | 100.00                      | 71.08            | Jan. 24th                    | 229                                  |
| <b>Workplace closing</b>                    | 0.00                        | 66.67              | 66.67                       | 48.41            | Jan. 26th                    | 229                                  |
| <b>Cancel public events</b>                 | 50.00                       | 100.00             | 100.00                      | 71.13            | Jan. 22nd                    | 229                                  |
| <b>Restriction on gatherings</b>            | 0.00                        | 75.00              | 100.00                      | 60.23            | Jan. 1st                     | 229                                  |
| <b>Close public<br/>transportation</b>      | 0.00                        | 0.00               | 50.00                       | 29.51            | Jan. 23rd                    | 229                                  |
| <b>Stay at home<br/>requirement</b>         | 0.00                        | 33.33              | 66.67                       | 33.13            | Jan. 23rd                    | 229                                  |
| <b>Restriction on internal<br/>movement</b> | 0.00                        | 50.00              | 75.00                       | 47.94            | Jan. 23rd                    | 229                                  |
| <b>International travel<br/>control</b>     | 75.00                       | 75.00              | 100.00                      | 75.76            | Jan. 1st                     | 229                                  |

Note: The areas/country here counted all sub-regions/states in UK and US separately. The table describes the data distribution of each policy. As an example, for policy “school closure,” the table shows that 3/4 of the total countries-dates have the school closure level higher than score 50, and the mean implementation score across overall countries-dates was 71.08.

**Table S11** – The cluster centroids of each COVID-19 CRP based on K-mean algorithm results

| <b>Policy Indicator</b>                 | <b>Mild</b> | <b>Moderate</b> | <b>Stringent</b> |
|-----------------------------------------|-------------|-----------------|------------------|
| <b>School closure</b>                   | 15.15036    | 68.49417        | 92.84664         |
| <b>Workplace closing</b>                | 7.927928    | 44.22697        | 72.29106         |
| <b>Cancel public events</b>             | 10.90788    | 77.8721         | 95.40996         |
| <b>Restriction on gatherings</b>        | 10.98496    | 65.14231        | 86.41839         |
| <b>Close public transportation</b>      | 1.821469    | 12.61517        | 55.39967         |
| <b>Stay at home requirement</b>         | 3.366324    | 23.80726        | 55.56279         |
| <b>Restriction on internal movement</b> | 5.590027    | 32.95125        | 81.40778         |
| <b>International travel control</b>     | 57.59041    | 72.46204        | 81.90763         |



## Supplementary Text 2: Statistical analysis

- Multilevel mixed effect model

In the pooled analysis, we applied multilevel meta-analytical models as a priori considering the variations in the associations across two nested groups (cities and countries) and pooled city-specific estimations to calculate the overall (global) association. Further, city-specific random-effect was also applied to synthesize the association, and the likelihood ratio test was used to examine the necessity to consider two nested variations. The high heterogeneity ( $I^2=80.7\%$  in city-specific random-effect models,  $I^2=78.1\%$  in the city- and country-specific random-effect models) in the pooled estimates and the likelihood ratio test between city-specific random-effects model and city- and country-specific random-effect models ( $P<0.001$ ) further confirmed the need to consider the nested variation across city- and country-level.

Our model can be written as:

$$\beta_{r,u,n} = \beta_r x_{r,u,n} + \xi_{r,u} + \xi_n + \varepsilon;$$

What this study was interested in was  $\beta_r$ , which represented the certain COVID-19 CRPs' (r) average effects; and  $\beta_{r,u,n}$  represented the urban-agglomeration-specific effects coming from urban u in country n first-stage analysis.

The random effects  $\xi_{r,u}$  in the location level are induced first, which can minimize the bias when we introduce national lockdown policy situation to location level; another random effects  $\xi_n$  could capture the political and cultural related variance at the country level. Besides, an unstructured covariance matrix structure was adapted here, to estimate and capture heterogeneity for each CRP.

Our two-stage analytic framework controlled the influence from the meteorology and time trend at first and focused on the policy intervention effect in each urban agglomeration. Besides, it enabled us to pool our evidence into national and regional level.

- Effect modification by population of locations

We applied a mixed-effects meta-regression model to explore the effect modification by urban population.

$$\beta_{r,u} = \beta_r x_{r,u} + \xi_u + \varepsilon;$$

Where  $\beta_r$  with the categorical variable was the average policy intervention effects for cities with population r;  $\beta_r$  with the continual population size variable represented the population size's modification effect;  $\xi_u$  and  $\varepsilon$  represent the country- and location-specific random effects unobserved by our data.

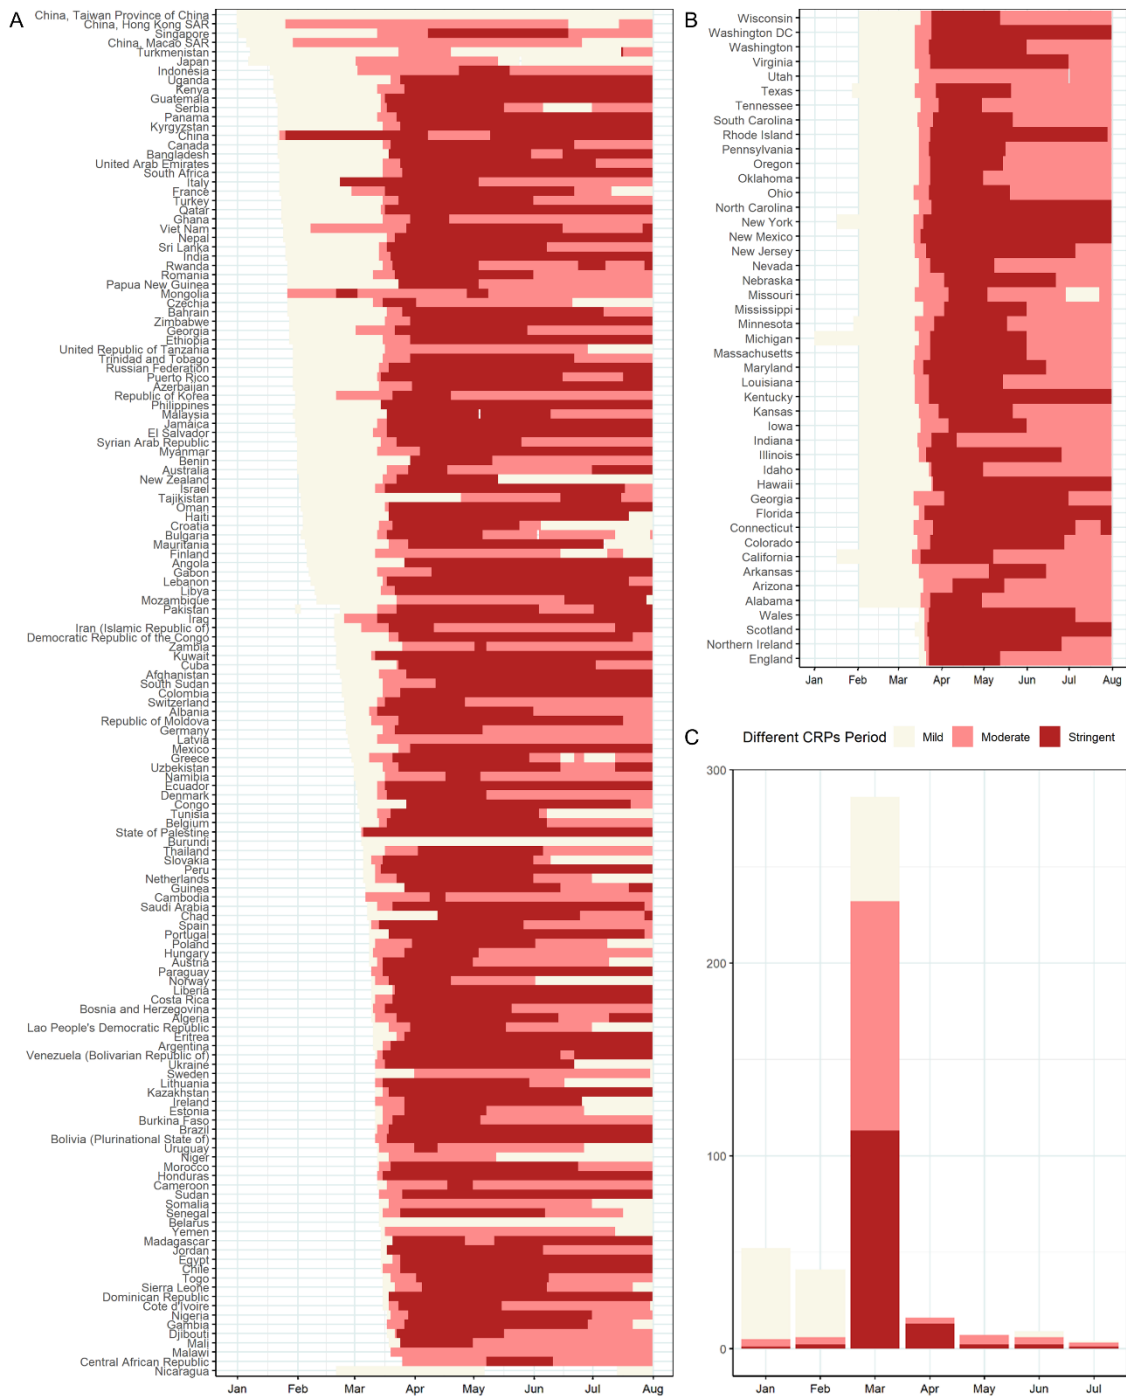

**Figure S1** – Timeline of different COVID-19 CRPs for each country from Jan 1st to July 31st 2020. A) National or regional timeline (except US and UK); B) Regional or state-level timeline for US and UK; C) Counts for countries' first-issued dates.

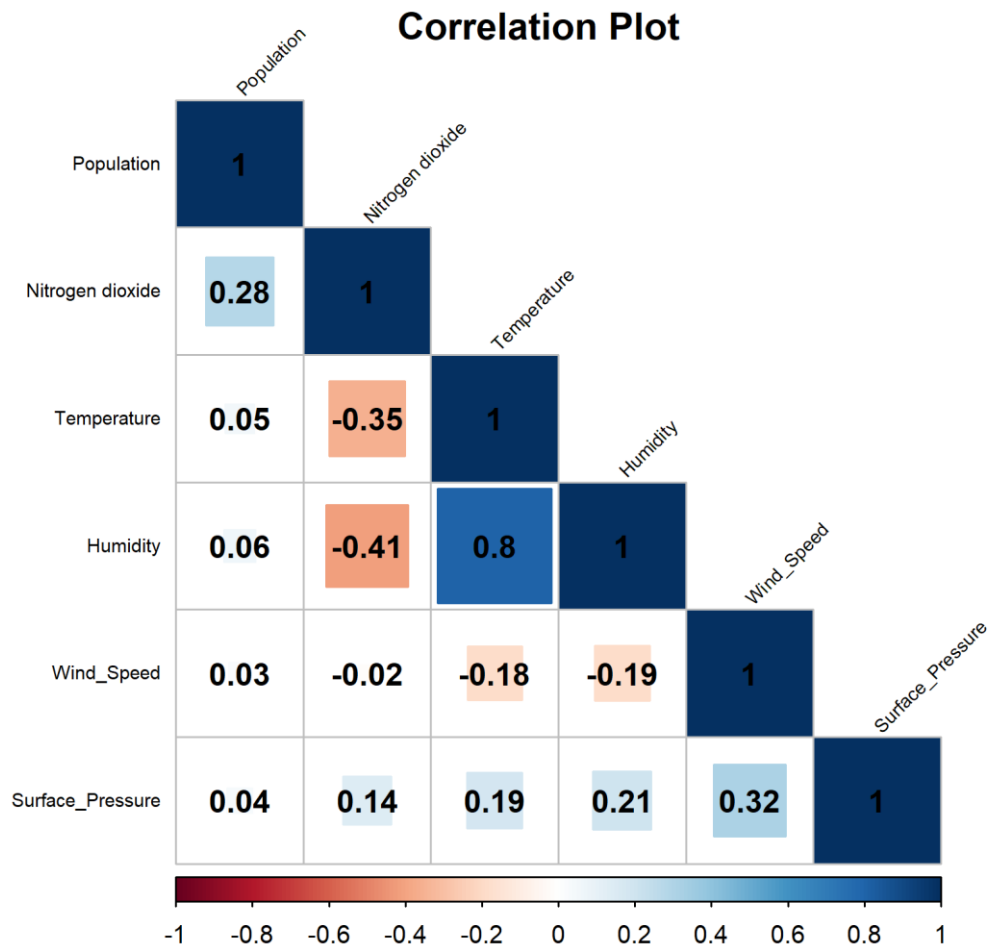

**Figure S2** – Pearson correlation coefficient between population sizes, baseline NO2 concentration (2019), and annual mean meteorological variables (2019).

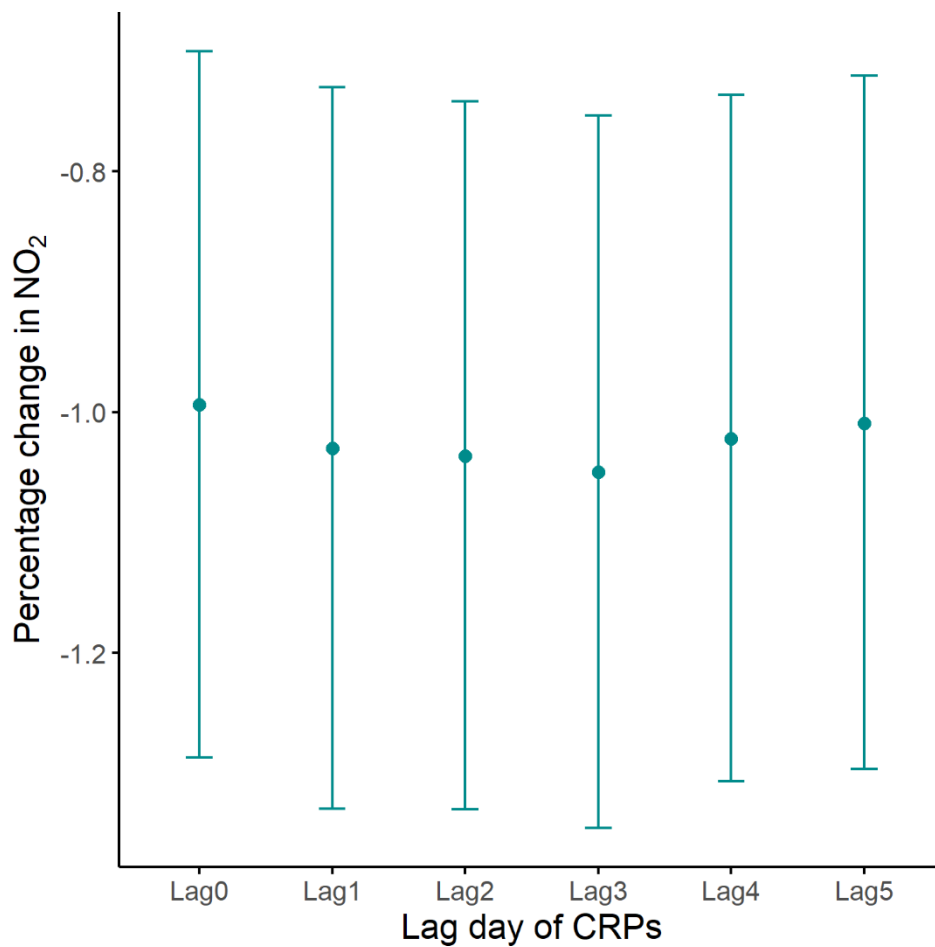

**Figure S3**– Percentage change of tropospheric NO<sub>2</sub> concentration associated with 10 increase in CRPs scores on different lag days for CRPs in 1,851 cities across 149 countries from January 1<sup>st</sup> 2019, to July 31<sup>st</sup> 2020. Lags indicate the time difference between the NO<sub>2</sub> concentration and the CRPs.

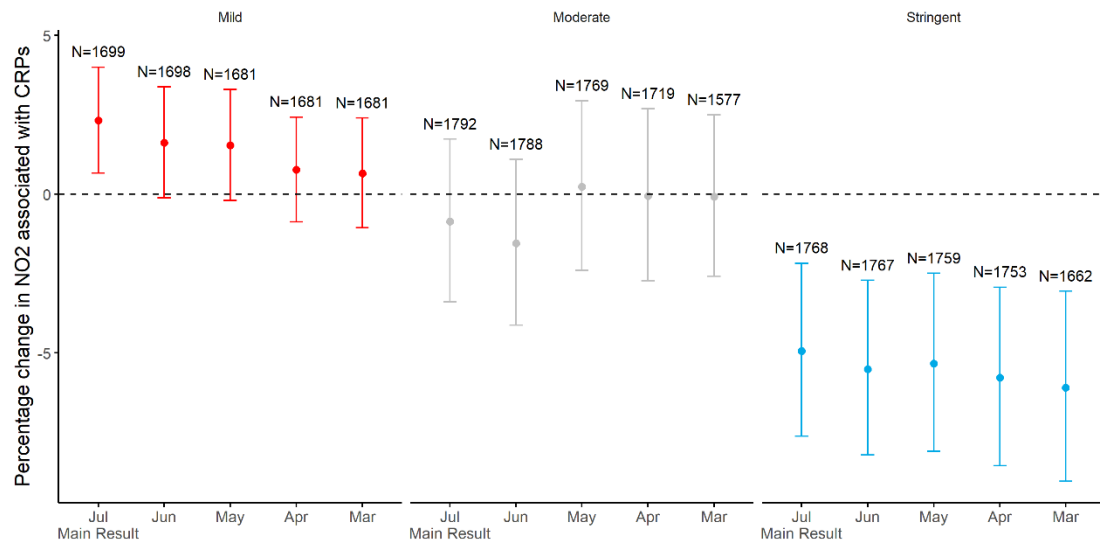

**Figure S4** – The percentage change in satellite observed NO<sub>2</sub> concentration associated with COVID-19 CRPs compared to the pre-CRP from January 1<sup>st</sup> 2019, to different study periods.

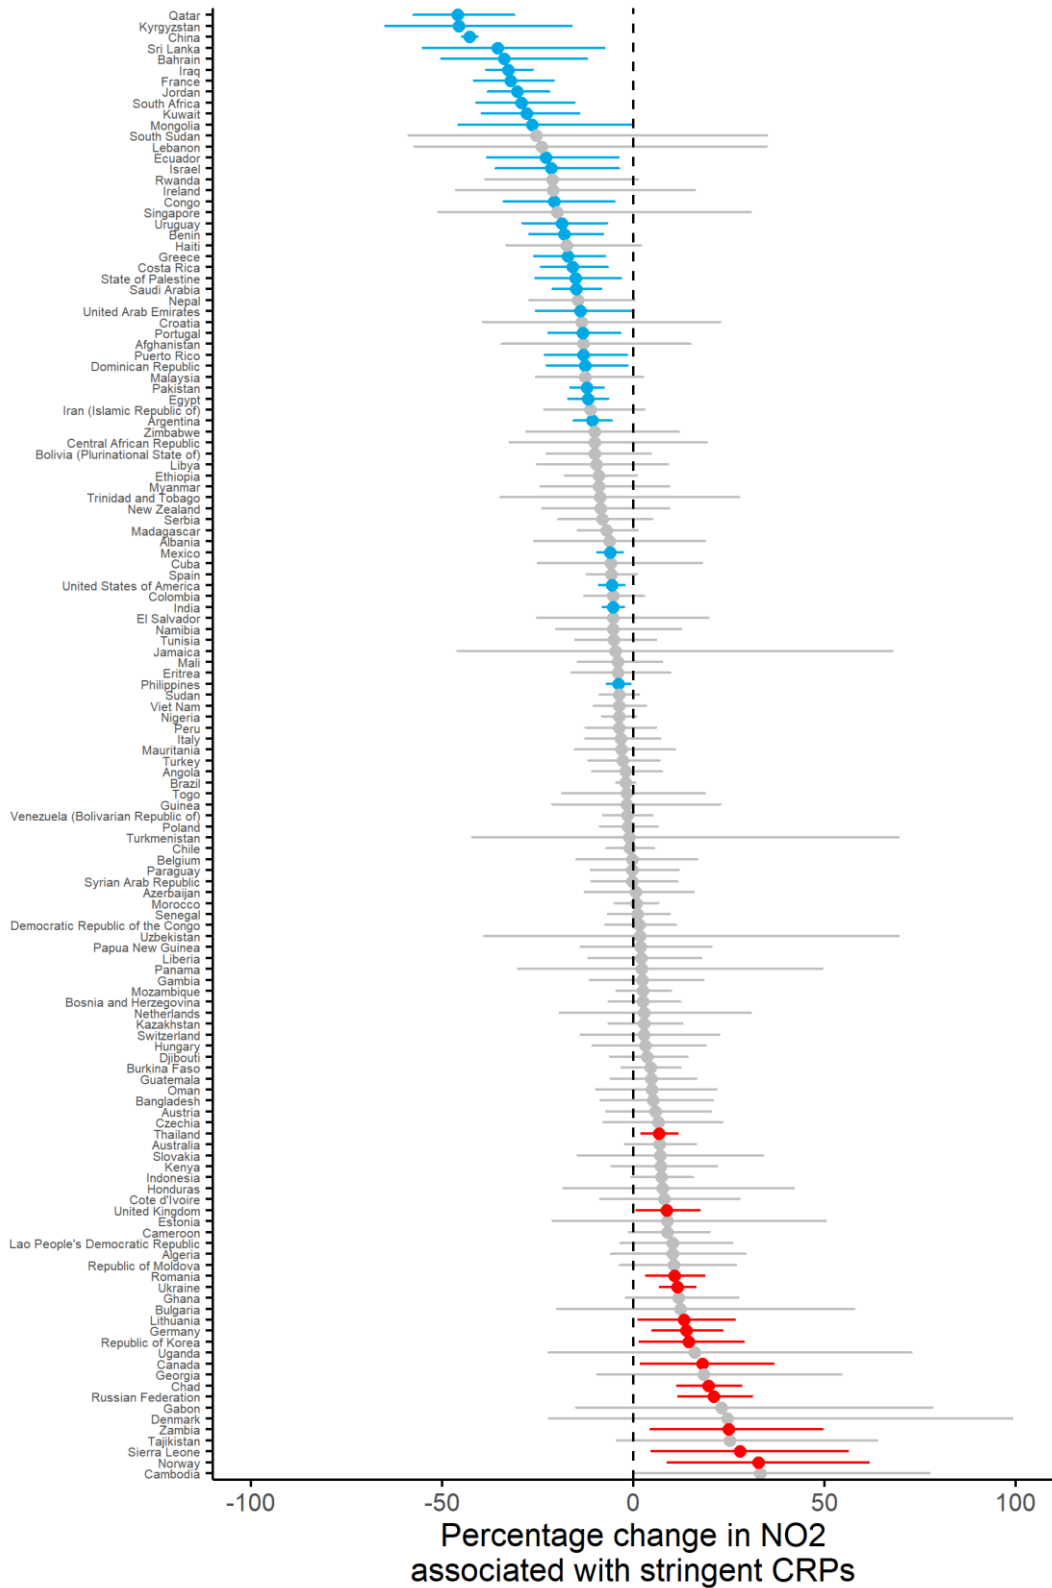

**Figure S5** – The percentage change in satellite observed NO<sub>2</sub> associated with stringent COVID-19 CRPs compared to the pre-CRP from January 1<sup>st</sup> 2019, to July 31<sup>st</sup> 2020, across 132 countries. Significant reductions are shown in blue while significant increases are shown in red.

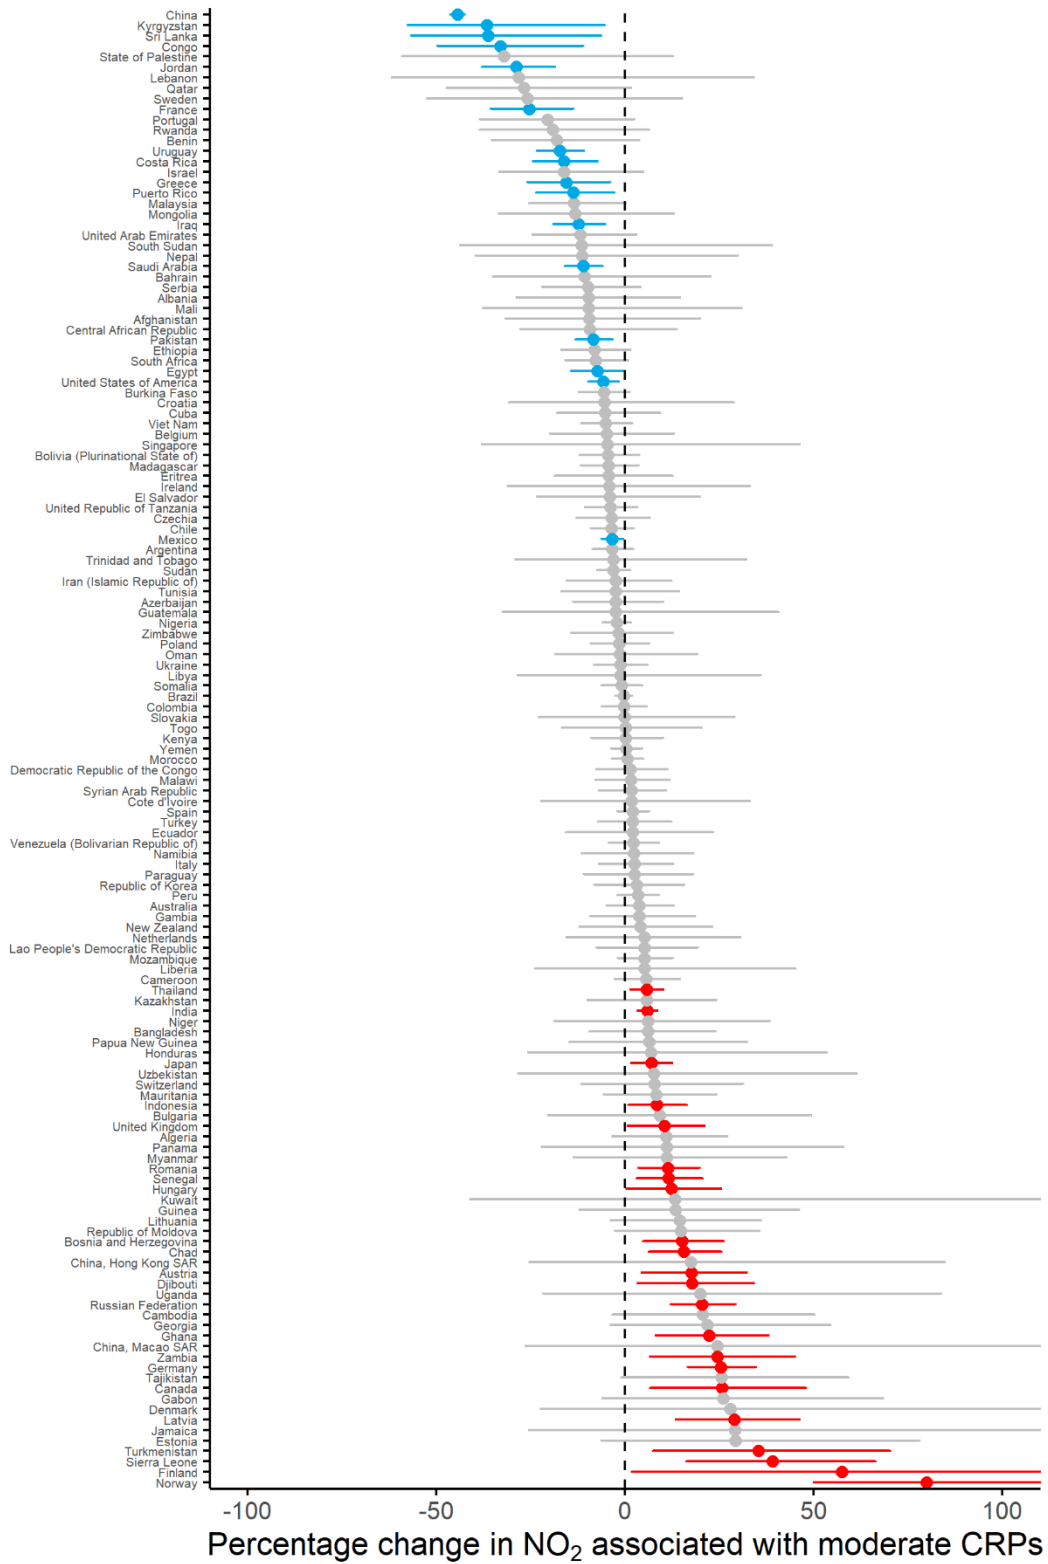

**Figure S6** – The percentage change in satellite observed NO<sub>2</sub> associated with moderate COVID-19 CRPs compared to the pre-CRP from January 1<sup>st</sup>, 2019, to July 31<sup>st</sup>, 2020, across 141 countries. Significant reductions are shown in blue while significant increases are shown in red.

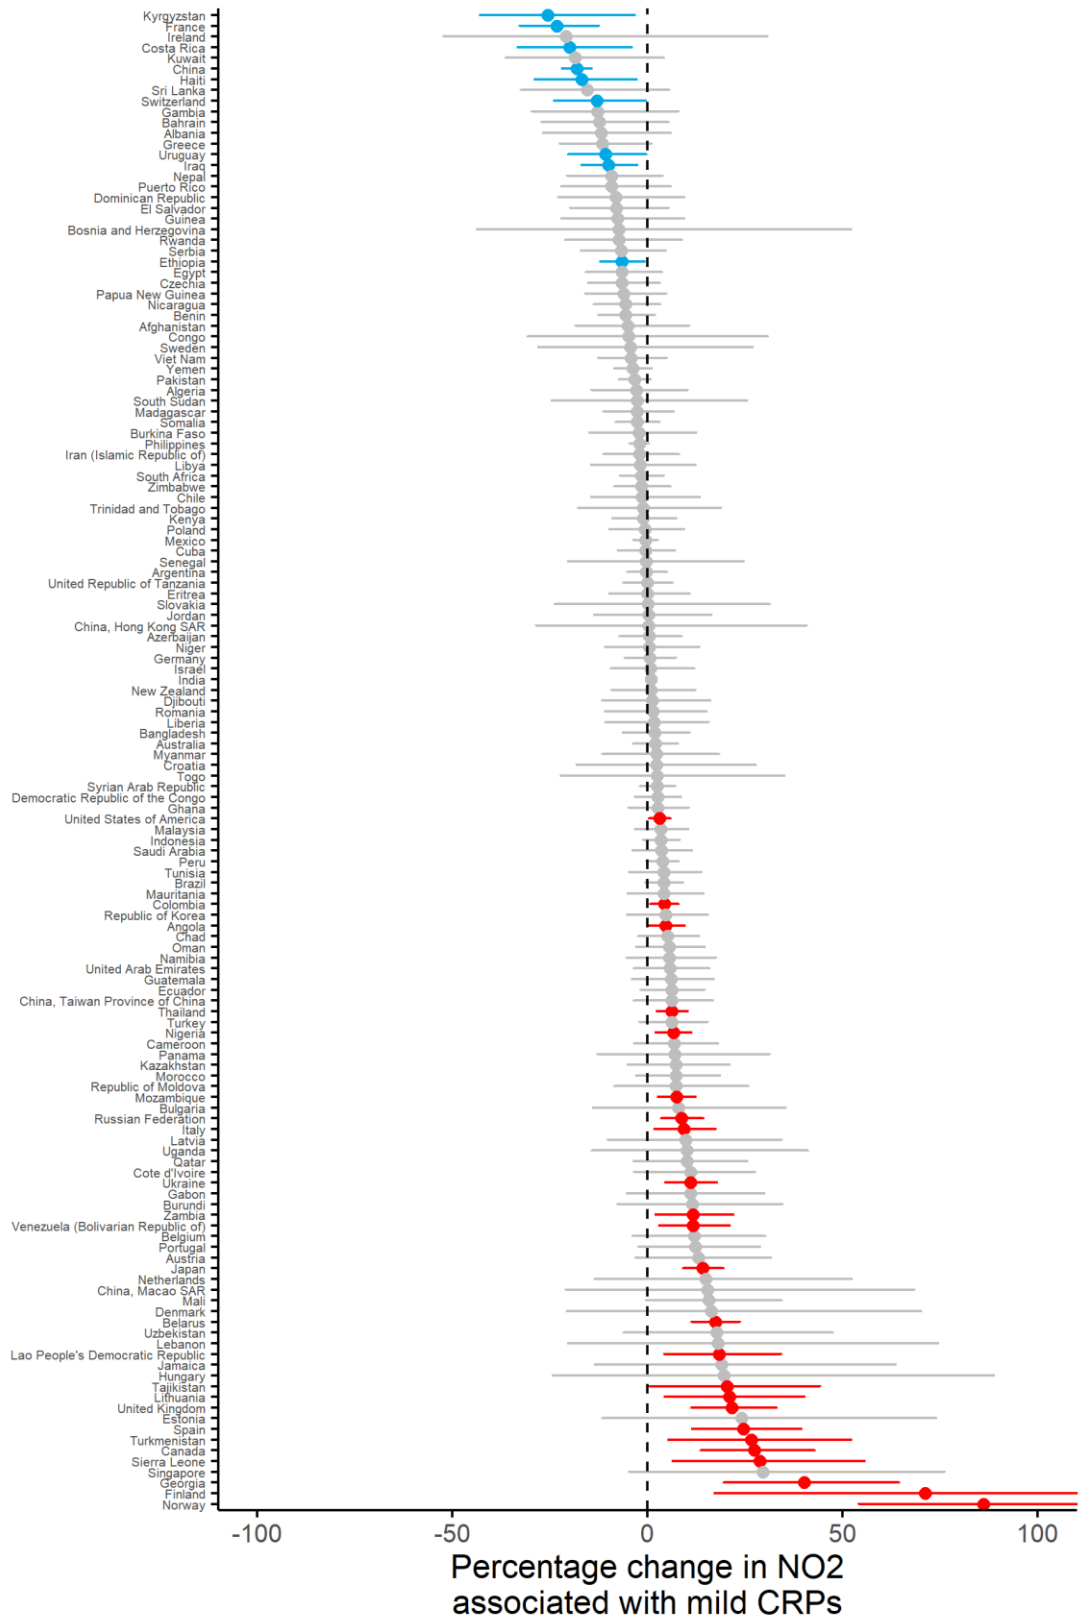

**Figure S7** – The percentage change in satellite observed NO<sub>2</sub> associated with mild COVID-19 CRPs compared to the pre-CRP from January 1<sup>st</sup>, 2019, to July 31<sup>st</sup>, 2020, across 140 countries. Significant reductions are shown in blue while significant increases are shown in red.



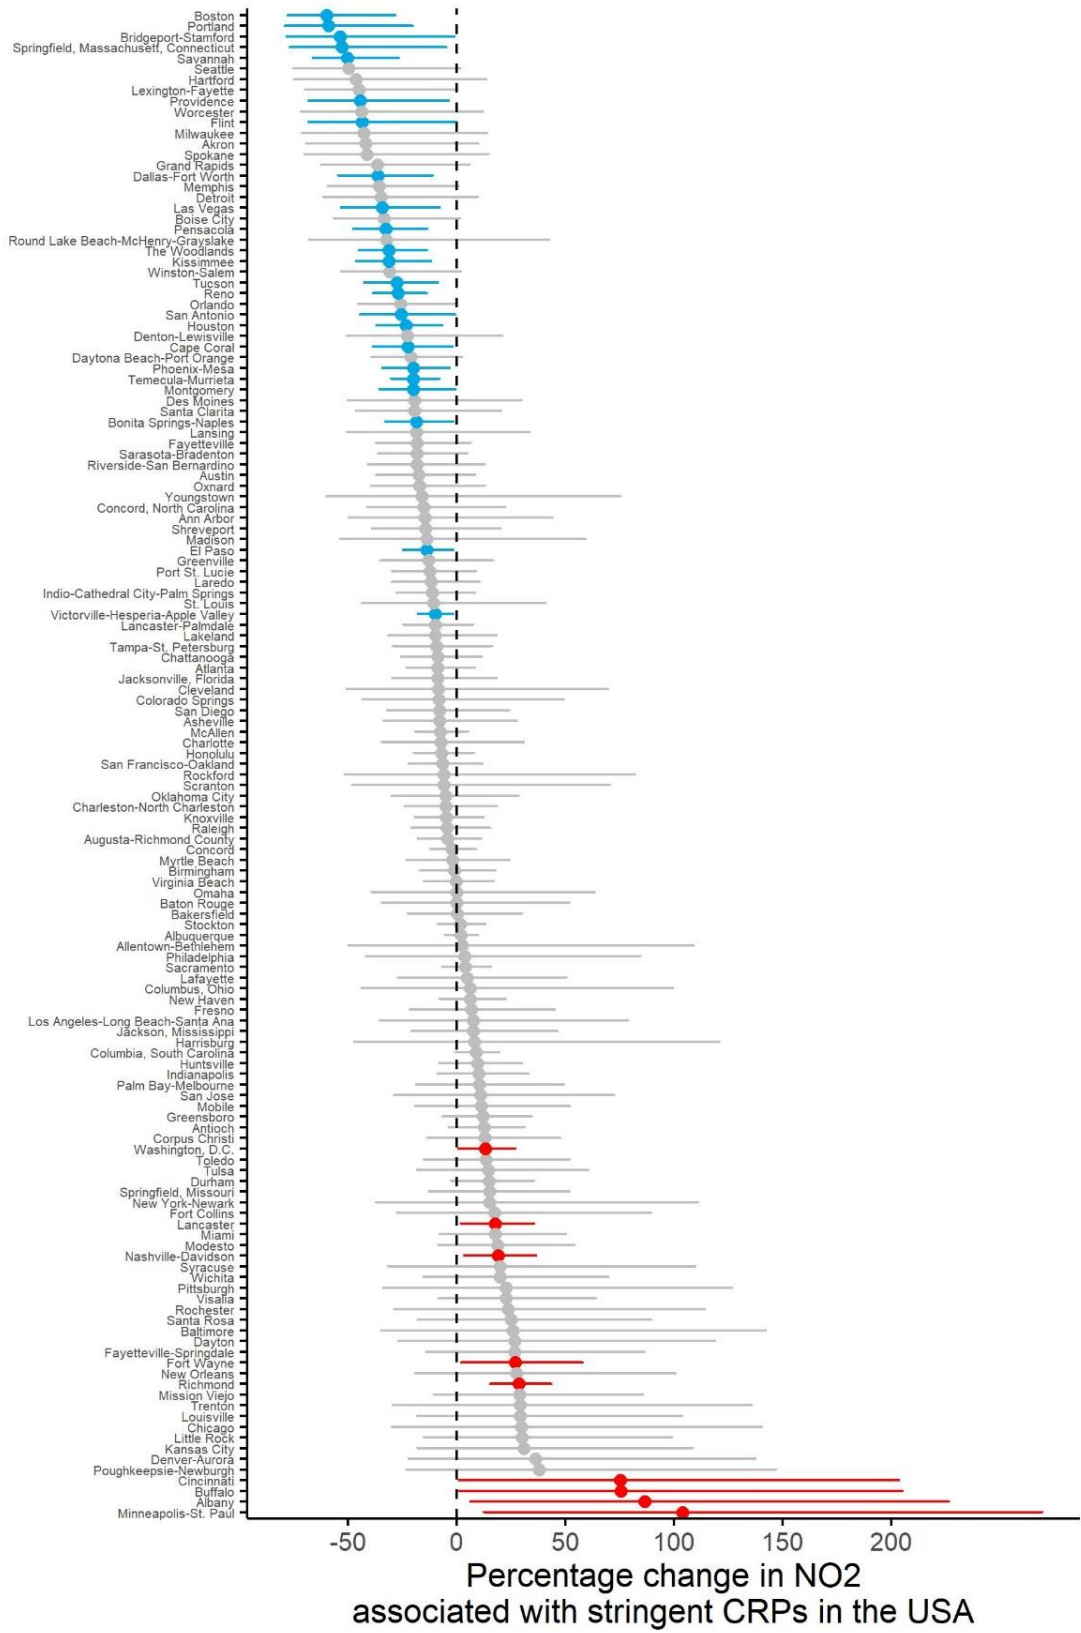

**Figure S8** – The percentage change in satellite observed NO<sub>2</sub> associated with stringent COVID-19 CRPs compared to the pre-CRP from January 1<sup>st</sup> 2019, to July 31<sup>st</sup> 2020, across 141 US cities (see SI, Figures S7, S8, or S10 for further US-specific results). Significant reductions are shown in blue while significant increases are shown in red.

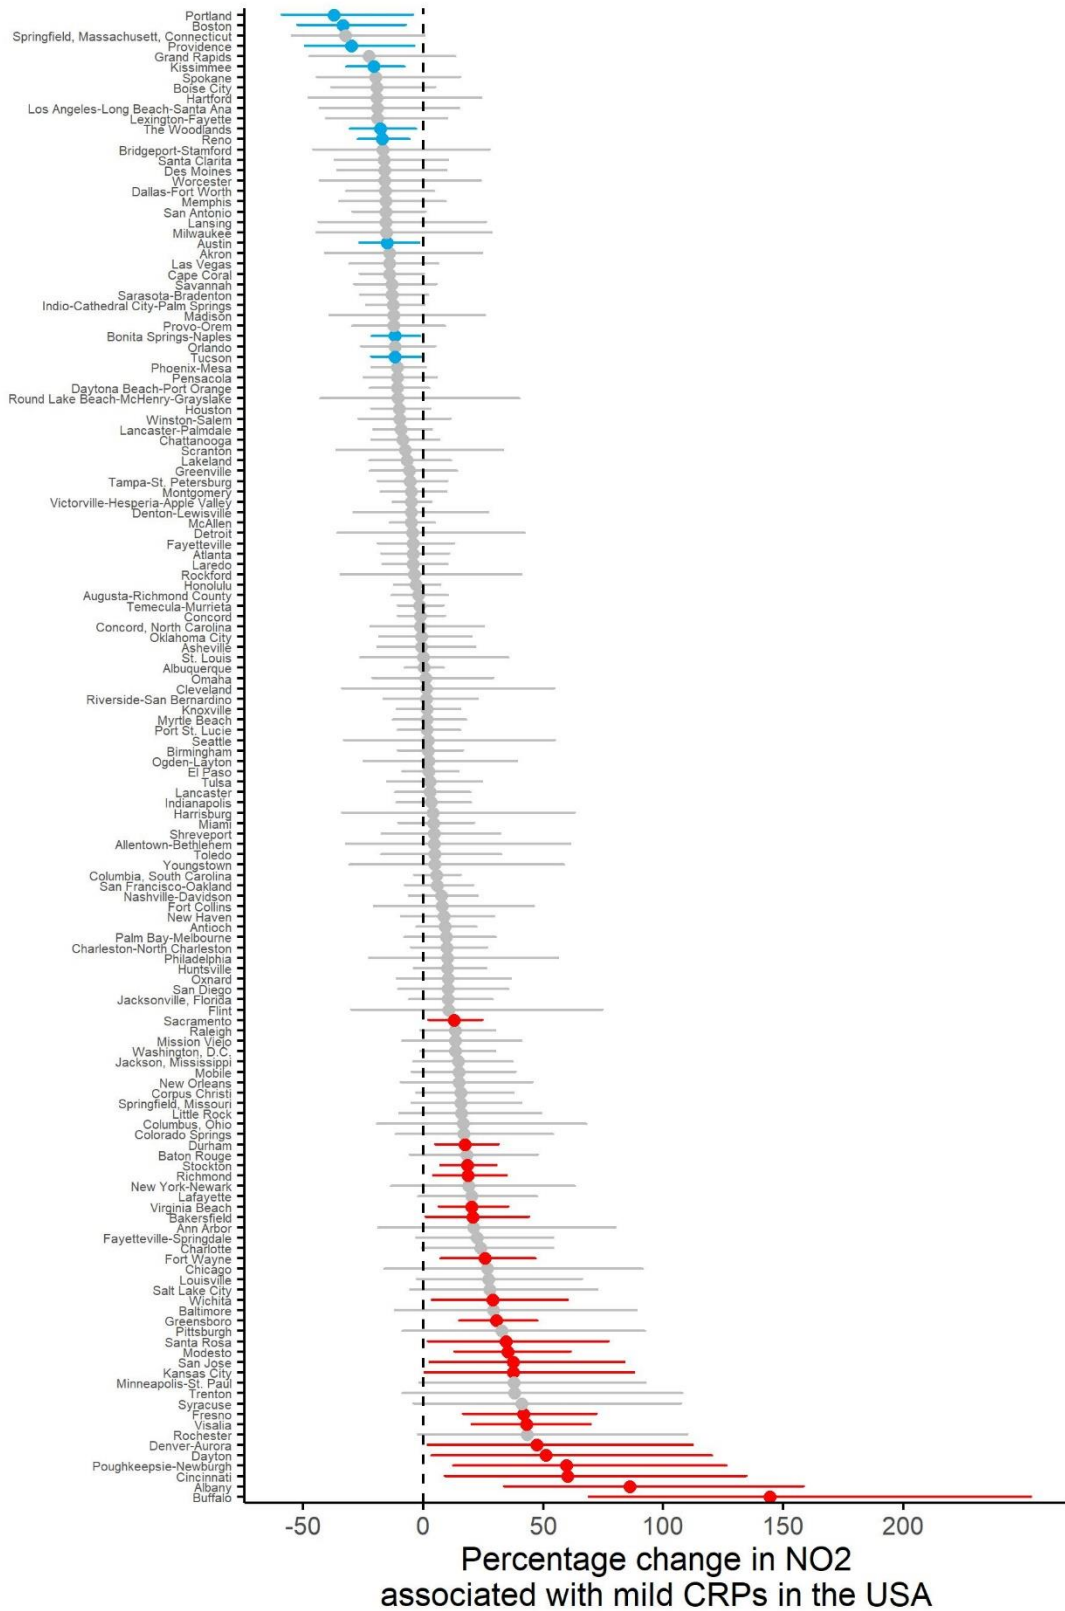

**Figure S9** – The percentage change in satellite observed NO<sub>2</sub> associated with mild COVID-19 CRPs compared to the pre-CRP from January 1<sup>st</sup>, 2019, to July 31<sup>st</sup>, 2020, across the US cities. Significant reductions are shown in blue while significant increases are shown in red.

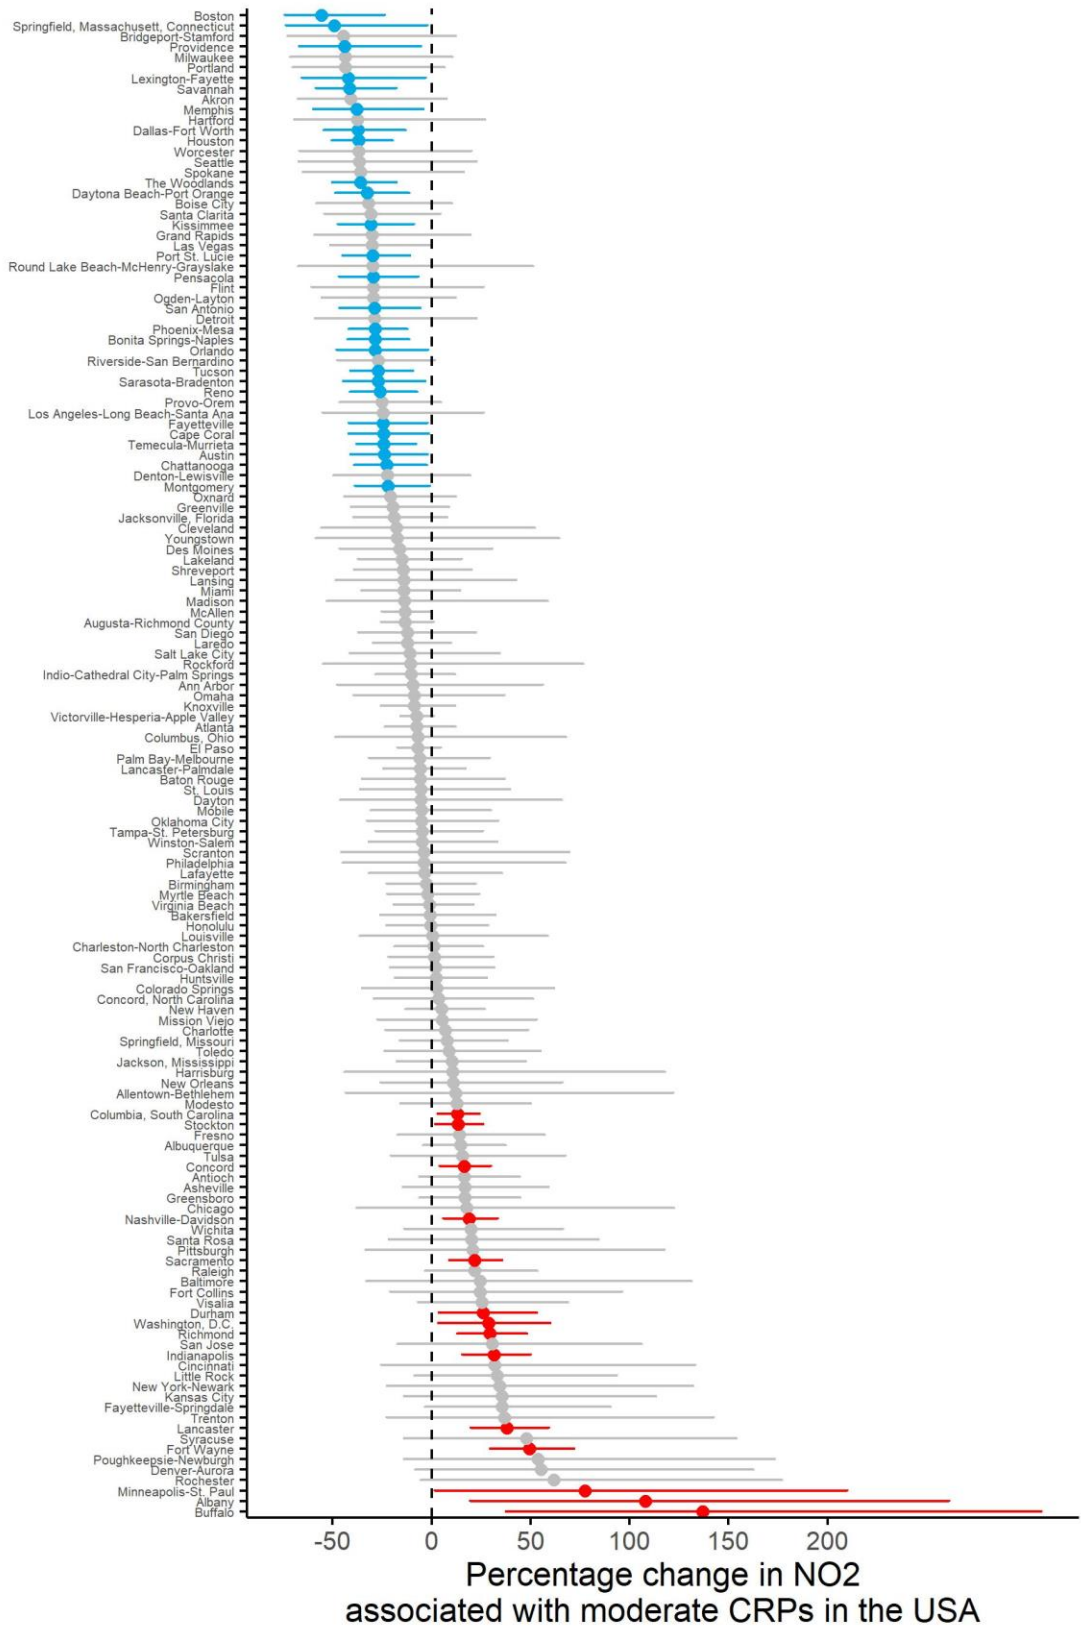

**Figure S10** – The percentage change in satellite observed NO<sub>2</sub> associated with moderate COVID-19 CRPs compared to the pre-CRP from January 1<sup>st</sup>, 2019, to July 31<sup>st</sup>, 2020, across the US cities. Significant reductions are shown in blue while significant increases are shown in red.

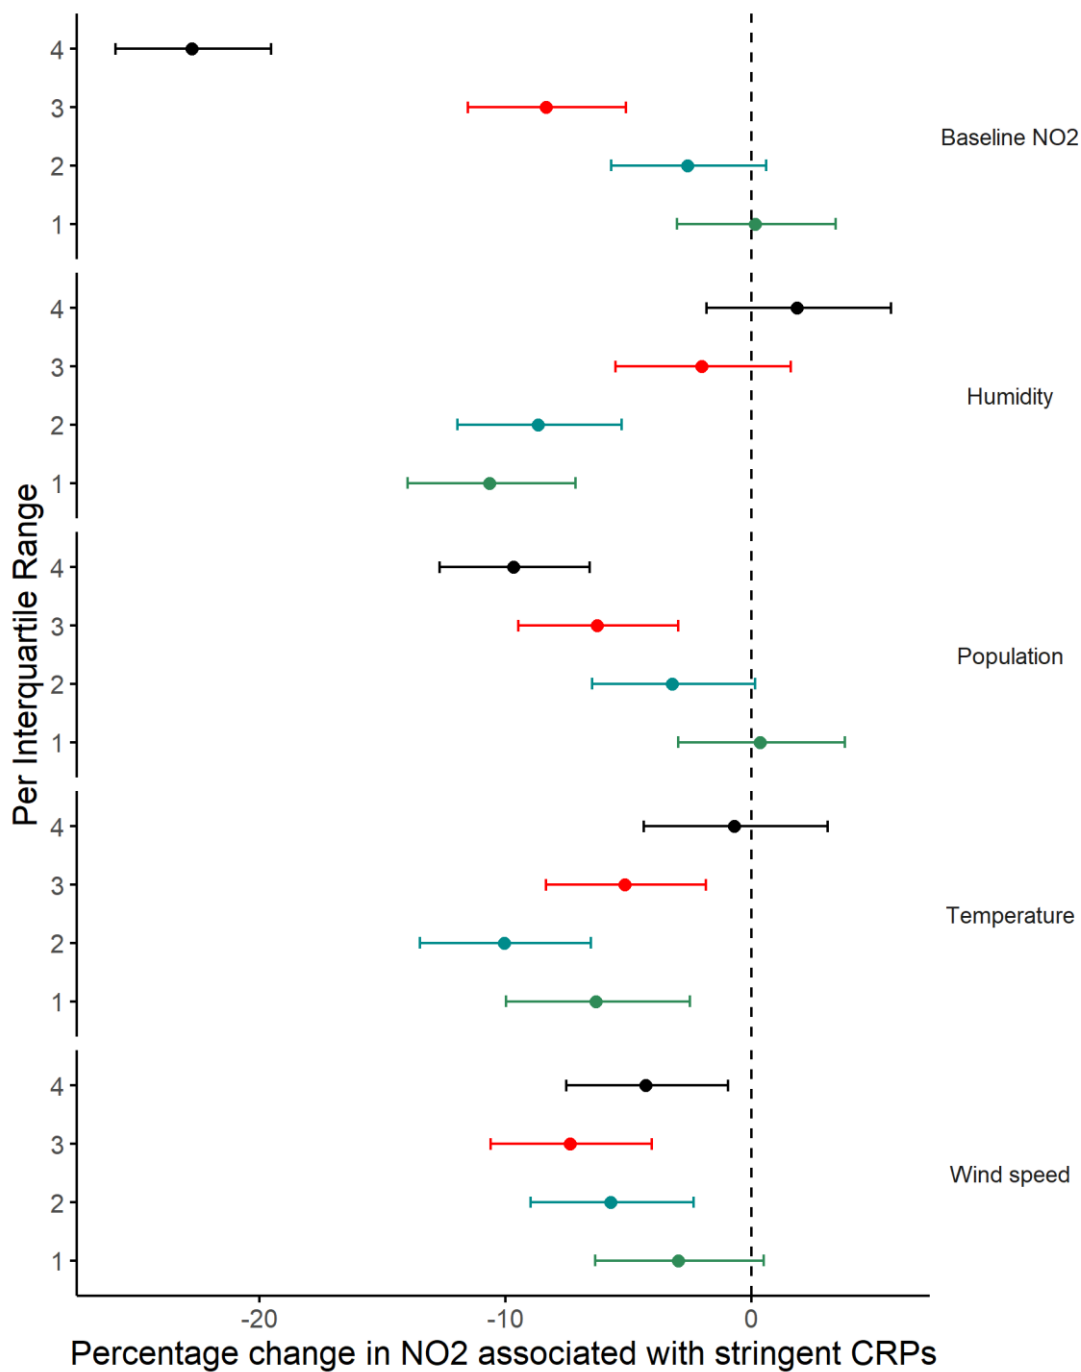

**Figure S11** – The potential effect modification by weather covariates, population and baseline NO<sub>2</sub> level. The NO<sub>2</sub> change in the least populated locations (locations from the 1<sup>st</sup> quarter range of population) was +0.3% (95% CI: -3.0%, +3.8%); however, in most populated locations (the locations from the 4<sup>th</sup> quarter range of population) the change was -9.7% (95% CI: -12.7%, -6.6%). The NO<sub>2</sub> change in the cleaner locations (locations from the 1<sup>st</sup> quarter range of 2019 annual mean NO<sub>2</sub>) was +0.1% (95% CI: -3.0%, +3.4%); however, in the most polluted locations (locations from the 4<sup>th</sup> quarter range), the change was -22.7% (95% CI: -25.8%, -19.5%).

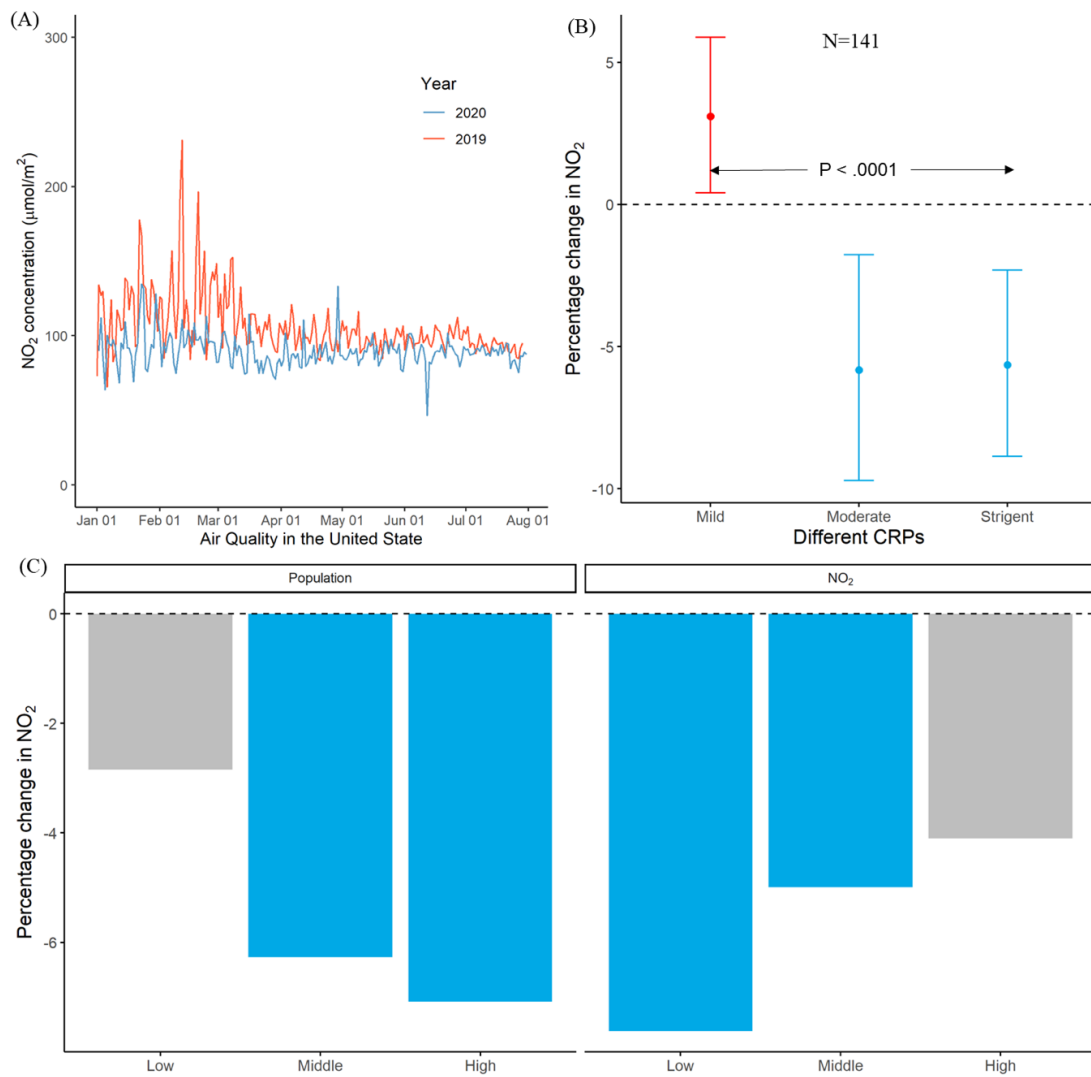

**Figure S12** – The air quality and corresponding change due to different CRPs in the United States. A) The time series of national average air quality in 2019 and 2020; B) The country-specific association between air quality and different CRPs in the USA (# of cities in this analysis was 141 where population of each city was > 300,000 inhabitants). The P-value is estimated using Cochran’s Q-test; C) Effect modification by population and NO<sub>2</sub> level in the USA. The cities in the US were divided into three population and NO<sub>2</sub> level categories based on tertiles.

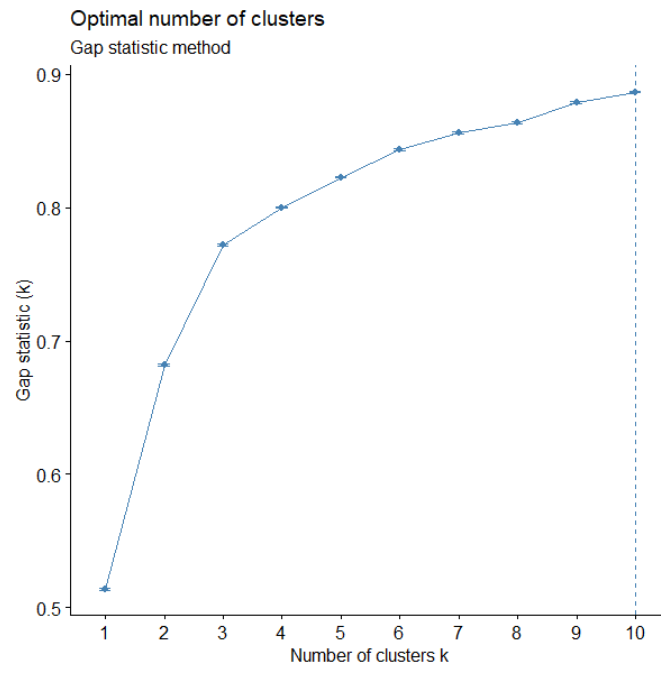

**Figure S13** – The gap statistic curve for COVID-19 response date across countries

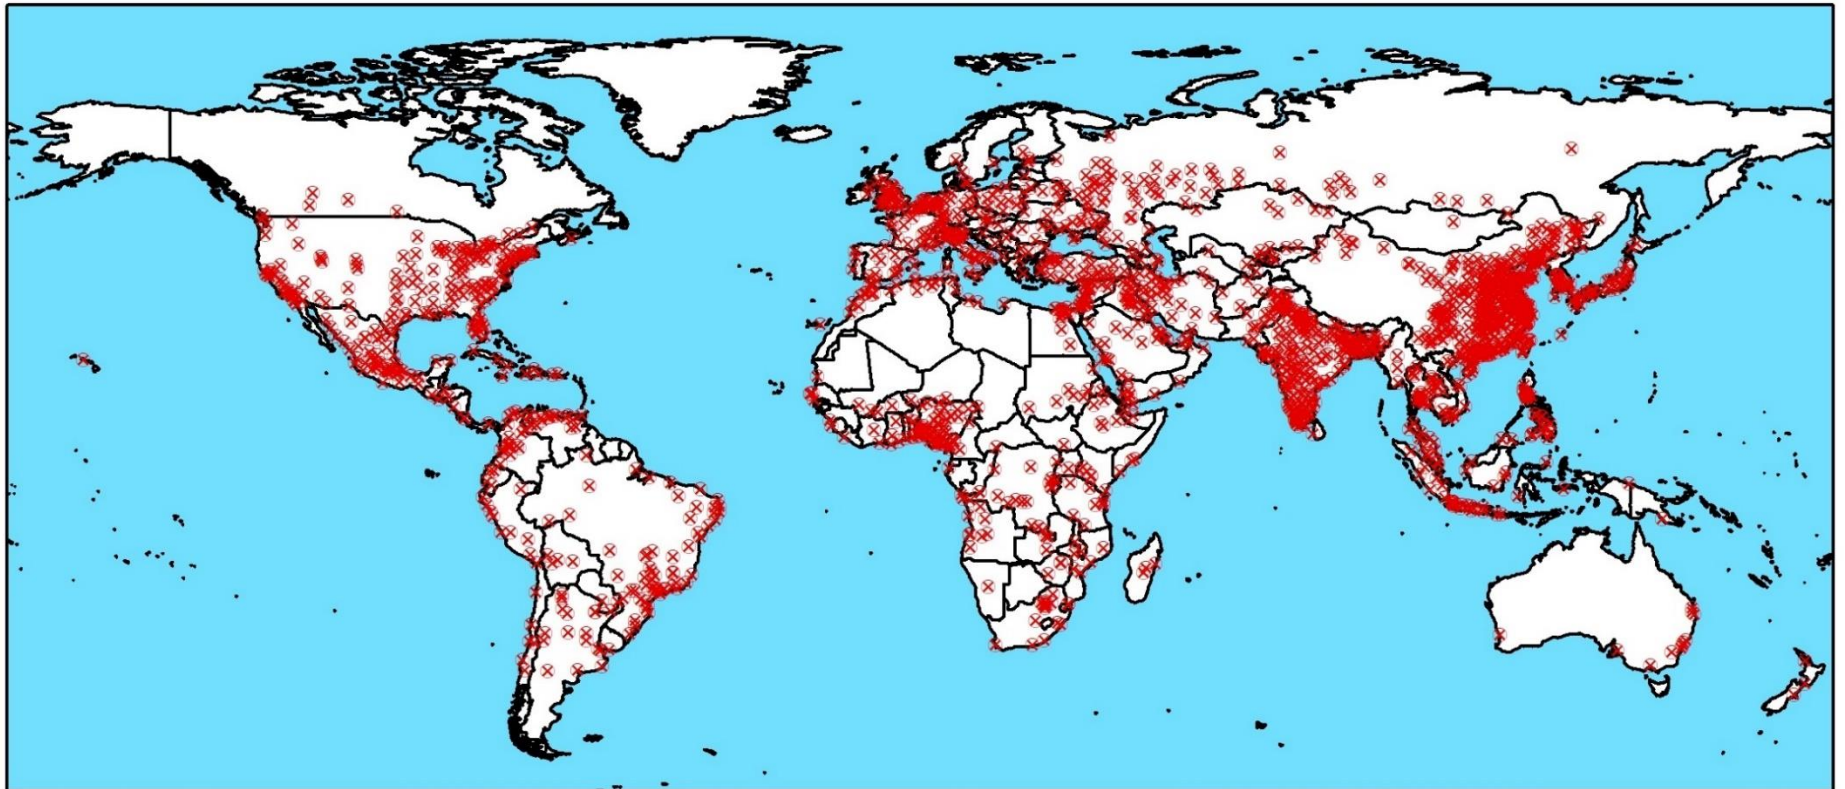

**Figure S14** – The spatial distribution of 1,851 locations across 149 countries where daily Sentinel 5P NO<sub>2</sub> was collected from January 01, 2019 up to July 31, 2020.

### Supplementary Text 3: Sample R code for Analysis

```
#####  
# Sample R code for the analysis in:  
# " Stringency of COVID-19 Containment Response Policies and Air Quality Changes: A  
Global Analysis across 1,851 Cities"  
#####  
library(readr); library(dplyr); library(metafor); library(mgcv); library(lubridate);  
library(splines)  
library(broom); library(splines)  
  
CAMP <- readRDS("H:/Ana/workdata/CAMP.rds")  
  
#Pre-process the data  
CAMP$timetrend <- as.numeric(CAMP$date)  
CAMP$week <- as.numeric(wday(CAMP$date))  
CAMP$NO2_1 <- log(CAMP$NO2)  
  
#Extract location specific data  
Cov.ID <- subset.data.frame(CAMP, CAMP$City.Code==S5City$City.Code[1])  
  
# location-specific log-linear regression models for CRPs score  
gam_1l <- gam(NO2_1~Score1 + s(timetrend, k=12) + as.factor(week) +  
          s(Temperature) + s(Humidity) + s(Wind_Speed) + s(Surface_Pressure),  
data=Cov.ID)  
  
GAM_df_score <- round(summary(gam_1l)$edf)  
names(GAM_df_score) <-  
c("timetrend", "Temperature", "Humidity", "Wind_Speed", "Surface_Pressure")  
  
glm_res <- glm(NO2_1~Score1 + ns(timetrend, df=GAM_df_score$timetrend[1]) +  
as.factor(week) +
```



```

      ns(Temperature,df=GAM_df_score$Temperature[1]) +
ns(Humidity,df=GAM_df_score$Humidity[1]) +
ns(Wind_Speed,df=GAM_df_score$Wind_Speed[1]) +
ns(Surface_Pressure,df=GAM_df_score$Surface_Pressure[1]), data=Cov.ID)

summary(glm_res)
GLM.Res.score <- tidy(glm_res)[c(2,)]

##Calculating the relative reduction associated with per 10 increase in CRPs scores
GLM.Res.score$RR <- exp(GLM.Res.score$estimate*10)-1
GLM.Res.score$URR <- exp((GLM.Res.score$estimate+qnorm(1-
0.05/2)*GLM.Res.score$std.error) *10)-1
GLM.Res.score$LRR <- exp((GLM.Res.score$estimate-qnorm(1-
0.05/2)*GLM.Res.score$std.error) *10)-1

# location-specific log-linear regression models for categorical CRPs
gam_df <- gam(NO2_1~RANK2 + s(timetrend, k=12) + as.factor(week) +
      s(Temperature) + s(Humidity) + s(Wind_Speed) + s(Surface_Pressure),
data=Cov.ID)

GAM_ldf <- round(summary(gam_df)$edf)
names(GAM_ldf) <-
c("timetrend","Temperature","Humidity","Wind_Speed","Surface_Pressure")

glm_res <- glm(NO2_1~RANK2 + ns(timetrend, df=GAM_ldf$timetrend[1]) +
as.factor(week) +
      ns(Temperature,df=GAM_ldf$Temperature[1]) +
ns(Humidity,df=GAM_ldf$Humidity[1]) +
ns(Wind_Speed,df=GAM_ldf$Wind_Speed[1]) +
ns(Surface_Pressure,df=GAM_ldf$Surface_Pressure[1]), data=Cov.ID)

```

```
GLM.IRes <- tidy(glm_res)[c(2,3,4),]
```

```
#Calculating relative reduction
```

```
GLM.IRes$RR <- exp(GLM.IRes$estimate)-1
```

```
GLM.IRes$URR <- exp(GLM.IRes$estimate+qnorm(1-0.05/2)*GLM.IRes$std.error)-1
```

```
GLM.IRes$LRR <- exp(GLM.IRes$estimate-qnorm(1-0.05/2)*GLM.IRes$std.error)-1
```

## SI References

1. X. Lian *et al.*, Impact of city lockdown on the air quality of COVID-19-hit of Wuhan city. *Science of The Total Environment* **742**, 140556 %U <http://www.sciencedirect.com/science/article/pii/S004896972034078X> (2020).
2. S. Zangari, D. T. Hill, A. T. Charette, J. E. Mirowsky, Air quality changes in New York City during the COVID-19 pandemic. *Science of The Total Environment* **742**, 140496 (2020).
3. S. Abdullah *et al.*, Air quality status during 2020 Malaysia Movement Control Order (MCO) due to 2019 novel coronavirus (2019-nCoV) pandemic. *Science of The Total Environment* **729**, 139022 (2020).
4. G. Dantas, B. Siciliano, B. B. França, C. M. da Silva, G. Arbilla, The impact of COVID-19 partial lockdown on the air quality of the city of Rio de Janeiro, Brazil. *Science of The Total Environment* **729**, 139085 %U <http://www.sciencedirect.com/science/article/pii/S0048969720326024> (2020).
5. L. Li *et al.*, Air quality changes during the COVID-19 lockdown over the Yangtze River Delta Region: An insight into the impact of human activity pattern changes on air pollution variation. *Science of The Total Environment* **732**, 139282 %U <http://www.sciencedirect.com/science/article/pii/S0048969720327996> (2020).
6. A. Tobías *et al.*, Changes in air quality during the lockdown in Barcelona (Spain) one month into the SARS-CoV-2 epidemic. *Science of The Total Environment* **726**, 138540 %U <http://www.sciencedirect.com/science/article/pii/S0048969720320532> (2020).
7. H. Zheng *et al.*, Significant changes in the chemical compositions and sources of PM<sub>2.5</sub> in Wuhan since the city lockdown as COVID-19. *Science of The Total Environment* **739**, 140000 %U <http://www.sciencedirect.com/science/article/pii/S0048969720335208> (2020).
8. K. Xu *et al.*, Impact of the COVID-19 Event on Air Quality in Central China. *Aerosol and Air Quality Research* **20**, 915-929 %U <http://dx.doi.org/910.4209/aaqr.2020.4204.0150> (2020).
9. J. D. Berman, K. Ebisu, Changes in U.S. air pollution during the COVID-19 pandemic. *Science of The Total Environment* **739**, 139864 %U <http://www.sciencedirect.com/science/article/pii/S0048969720333842> (2020).
10. P. Wang, K. Chen, S. Zhu, P. Wang, H. Zhang, Severe air pollution events not avoided by reduced anthropogenic activities during COVID-19 outbreak. *Resources, Conservation and Recycling* **158**, 104814 (2020).
11. M. C. Collivignarelli *et al.*, Lockdown for CoViD-2019 in Milan: What are the effects on air quality? *Science of The Total Environment* **732**, 139280 %U <http://www.sciencedirect.com/science/article/pii/S0048969720327972> (2020).
12. R. Bao, A. Zhang, Does lockdown reduce air pollution? Evidence from 44 cities in northern China. *Science of The Total Environment* **731**, 139052 %U <http://www.sciencedirect.com/science/article/pii/S0048969720325699> (2020).
13. A. Kerimray *et al.*, Assessing air quality changes in large cities during COVID-19 lockdowns: The impacts of traffic-free urban conditions in Almaty, Kazakhstan. *Science of The Total Environment* **730**, 139179 %U <http://www.sciencedirect.com/science/article/pii/S0048969720326966> (2020).
14. S. Sharma *et al.*, Effect of restricted emissions during COVID-19 on air quality in India. *Science of The Total Environment* **728**, 138878 %U <http://www.sciencedirect.com/science/article/pii/S0048969720323950> (2020).
15. S. Mahato, S. Pal, K. G. Ghosh, Effect of lockdown amid COVID-19 pandemic on air quality of the megacity Delhi, India. *Science of The Total Environment* **730**, 139086 %U <http://www.sciencedirect.com/science/article/pii/S0048969720326036> (2020).
16. M. Bauwens *et al.*, Impact of Coronavirus Outbreak on NO<sub>2</sub> Pollution Assessed Using TROPOMI and OMI Observations. *Geophysical Research Letters* **47**, e2020GL087978 (2020).
17. A. Chauhan, R. P. Singh, Decline in PM<sub>2.5</sub> concentrations over major cities around the world associated with COVID-19. *Environmental Research* **187**, 109634 %U <http://www.sciencedirect.com/science/article/pii/S0013935120305272> (2020).
18. K. Chen, M. Wang, C. Huang, P. L. Kinney, P. T. Anastas, Air pollution reduction and mortality benefit during the COVID-19 outbreak in China. *The Lancet Planetary Health* **4**, e210-e212 (2020).

19. T. Le *et al.*, Unexpected air pollution with marked emission reductions during the COVID-19 outbreak in China. *Science* **369**, 702 (2020).
20. J. Xing *et al.*, Quantifying the emission changes and associated air quality impacts during the COVID-19 pandemic on the North China Plain: a response modeling study. *Atmospheric Chemistry and Physics* **20**, 14347–14359 %U <https://acp.copernicus.org/articles/14320/14347/12020/> (2020).
21. G. He, Y. Pan, T. Tanaka, The short-term impacts of COVID-19 lockdown on urban air pollution in China. *Nature Sustainability*, (2020).
22. Z. S. Venter, K. Aunan, S. Chowdhury, J. Lelieveld, COVID-19 lockdowns cause global air pollution declines. *Proceedings of the National Academy of Sciences* **117**, 18984-18990 (2020).
23. Y. Wang *et al.*, Four-Month Changes in Air Quality during and after the COVID-19 Lockdown in Six Megacities in China. *Environmental Science & Technology Letters* **7**, 802-808 (2020).
24. L. Menut *et al.*, Impact of lockdown measures to combat Covid-19 on air quality over western Europe. *Science of The Total Environment* **741**, 140426 %U <http://www.sciencedirect.com/science/article/pii/S0048969720339486> (2020).
25. P. Giani *et al.*, Short-term and long-term health impacts of air pollution reductions from COVID-19 lockdowns in China and Europe: a modelling study. *Lancet Planet Health* **4**, e474-e482 (2020).
26. F. Liu *et al.*, Abrupt decline in tropospheric nitrogen dioxide over China after the outbreak of COVID-19. *Science Advances* **6**, eabc2992 (2020).
27. H.-A. H. Dang, T.-A. Trinh, Does the COVID-19 lockdown improve global air quality? New cross-national evidence on its unintended consequences. *Journal of Environmental Economics and Management*, 102401 (2020).
28. Y. Zhao *et al.*, Substantial Changes in Nitrogen Dioxide and Ozone after Excluding Meteorological Impacts during the COVID-19 Outbreak in Mainland China. *Environmental Science & Technology Letters* **7**, 402-408 (2020).
29. H. Thomas, W. Sam, P. Anna, P. Toby, K. Beatriz. (Blavatnik School of Government, 2020).
30. T. Hale *et al.*, A global panel database of pandemic policies (Oxford COVID-19 Government Response Tracker). *Nat Hum Behav*, (2021).
31. R. Tibshirani, G. Walther, T. Hastie, Estimating the number of clusters in a data set via the gap statistic. *Journal of the Royal Statistical Society: Series B (Statistical Methodology)* **63**, 411-423 %U <https://doi.org/410.1111/1467-9868.00293> (2001).
32. A. W. F. Edwards, Cavallis.LI, A Method for Cluster Analysis. *Biometrics* **21**, 362-& (1965).
33. M. B. Eisen, P. T. Spellman, P. O. Brown, D. Botstein, Cluster analysis and display of genome-wide expression patterns. *P Natl Acad Sci USA* **95**, 14863-14868 (1998).
34. Y. Shan *et al.*, City-level climate change mitigation in China. *Science advances* **4**, eaaq0390 (2018).
35. A. Singh, A. Yadav, A. Rana, K-means with Three different Distance Metrics. *International Journal of Computer Applications* **67**, 13-17 (2013).
